# Supplementary material for: Chiral phosphoric acid catalyzed intermolecular [4 + 2] cycloaddition for the synthesis of chiral azomethine imines: mechanism and stereochemical model
Source: Royal Society of Chemistry journal article supplement (doi:10.1039/d5qo00203f), 2025-01-01
Supplement: d5qo00203f1.pdf [file d5qo00203f1.pdf]

## Supplementary information

### **Chiral Phosphoric Acid Catalyzed Intermolecular [4+2] Cycloaddition for Chiral Azomethine imines: Mechanism and Stereochemical Model**

Weichi Chen,<sup>a,b</sup> Zhongqing Qu,<sup>b</sup> Shuanglin Qu,<sup>b</sup> Abing Duan<sup>\*,a</sup>

<sup>a</sup> College of Environmental Science and Engineering, Hunan University, Changsha 410082, China.

<sup>b</sup> College of Chemistry and Chemical Engineering, Hunan University, Changsha 410082, China.

\*Corresponding author: College of Environmental Science and Engineering, Hunan University, Changsha, Hunan 410082, China. E-mail: [duanabing@hnu.edu.cn](mailto:duanabing@hnu.edu.cn)

## Table of Contents

|                                                                                                                     |     |
|---------------------------------------------------------------------------------------------------------------------|-----|
| 1. Reactivity of (3+2) Cycloaddition Between Dienes 1a–7f and MDA.....                                              | 3   |
| 2. Free Energy Profiles for (3+2) and [4+2] Cycloadditions .....                                                    | 5   |
| 3. Details in Nucleus-Independent Chemical Shifts (NICS) .....                                                      | 7   |
| 4. Benchmark for Various Atomic Charges .....                                                                       | 8   |
| 5. Activation Strain Model of Intermolecular (3+2) Cycloaddition .....                                              | 15  |
| 6. Activation Strain and Compete Energy Decomposition Diagrams of (3+2) and [4+2] Cycloadditions .....              | 16  |
| 7. Free Energy Profile of Light Excitation of 2-Methylbenzophenone to Afford Hydroxy- <i>o</i> -quinodimethane..... | 17  |
| 8. Equation of Calculation <i>ee</i> Values .....                                                                   | 17  |
| 9. Buried Volumes of CPA Catalysts.....                                                                             | 17  |
| 10. Space-Filling Models of Transition States for 7bb Enantiomers .....                                             | 18  |
| 11. Possible transition states of CPA-catalyzed (3+2) and [4+2] cycloadditions .....                                | 19  |
| 12. Benchmark for Various DFT Methods.....                                                                          | 21  |
| 13. Conformation Analysis of Possible (3+2) and [4+2] Cycloaddition Transition States .....                         | 22  |
| 14. Table of Energies.....                                                                                          | 37  |
| 15. Cartesian Coordinates of the Structures.....                                                                    | 44  |
| 16. Refrences.....                                                                                                  | 155 |

# 1. Reactivity of (3+2) Cycloaddition Between Dienes 1a–7f and MDA

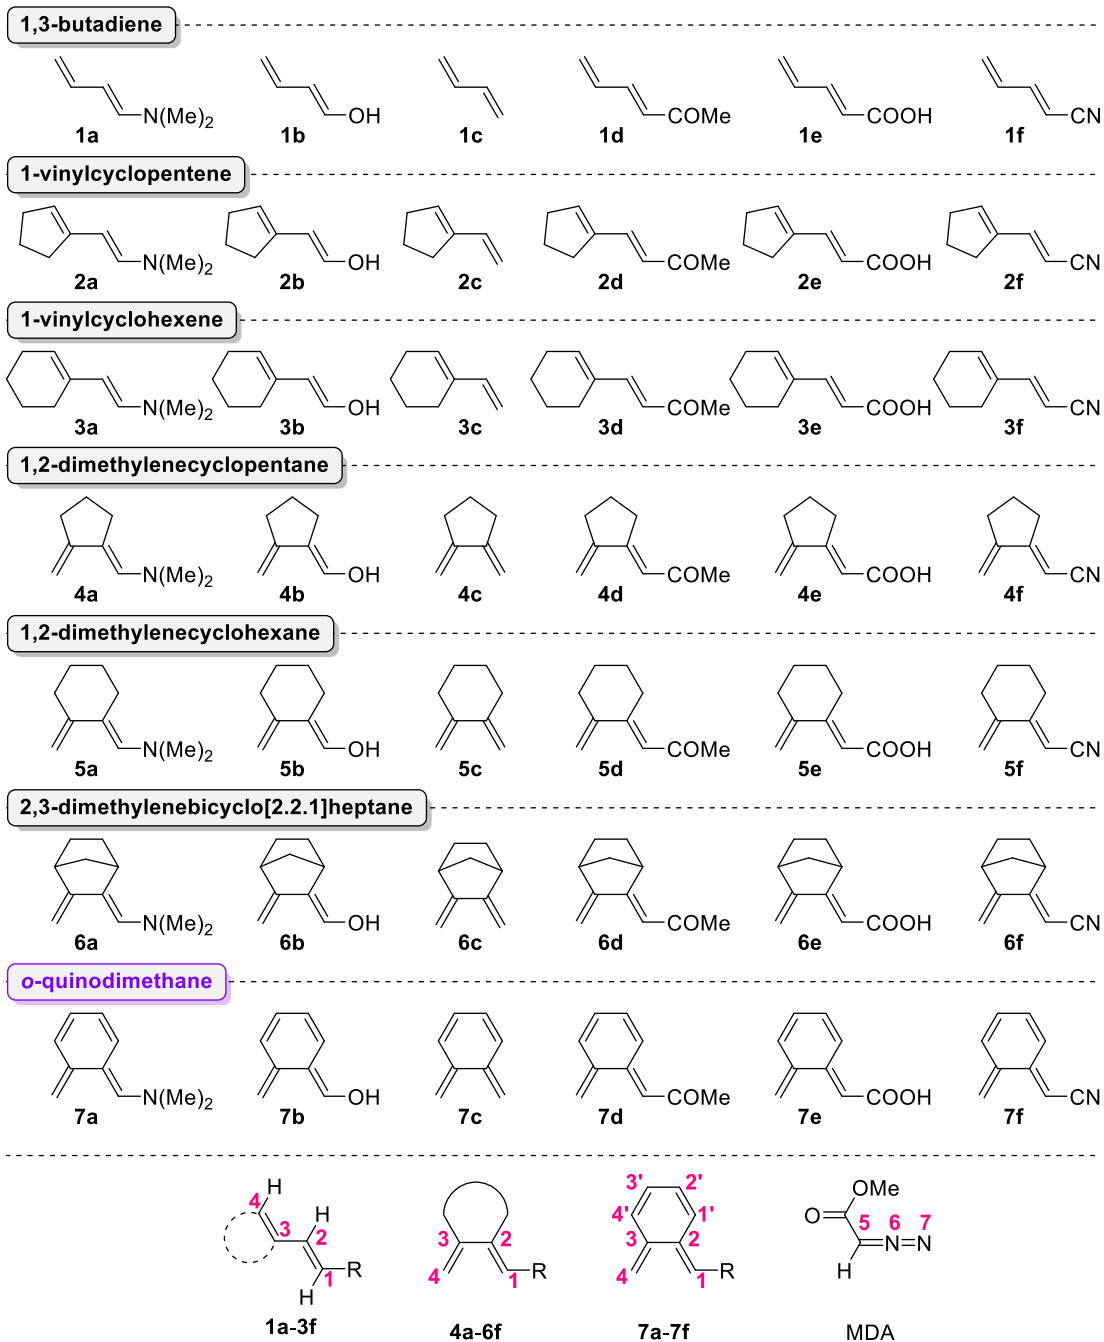

Scheme S1. Schematic structures of dienes involved in (3+2) and [4+2] cycloadditions.

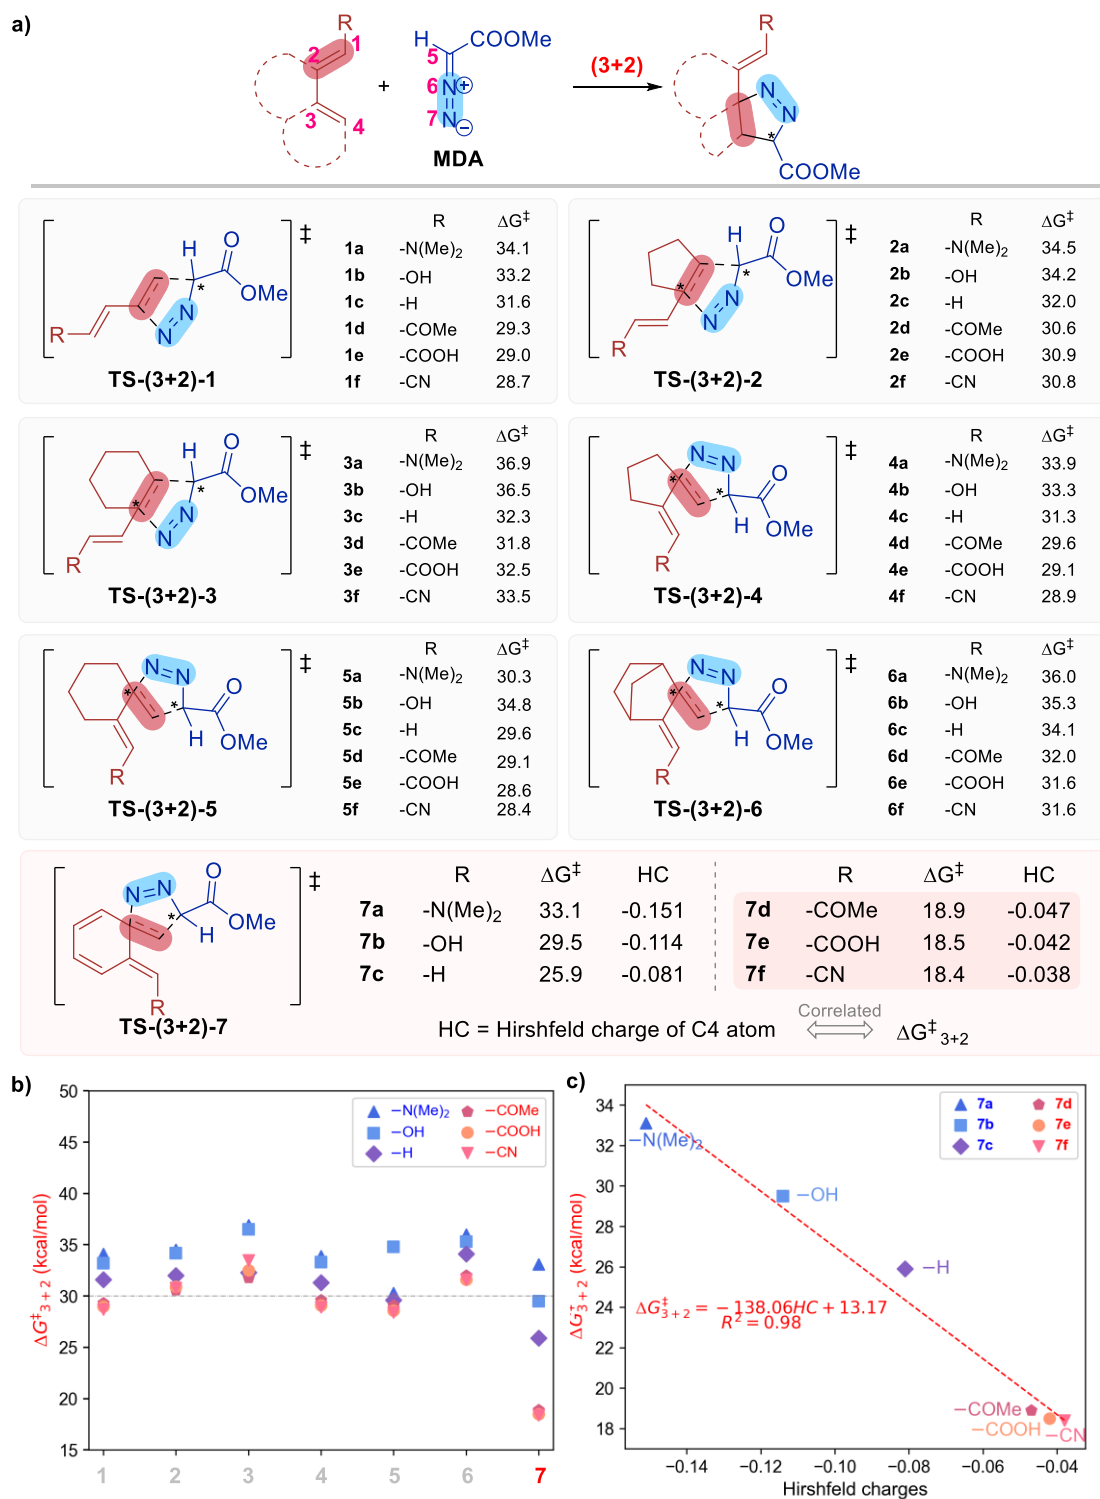

**Figure S1.** (a) Schematic structures of dienes involved in (3+2) cycloadditions and atom numbering. (b) Activation barriers for (3+2) cycloadditions between **MDA** and dienes. (c) Linear correlations between Hirshfeld charges on the C4 atom of dienes and activation barriers for (3+2) cycloadditions.

## 2. Free Energy Profiles for (3+2) and [4+2] Cycloadditions

**Table S1.** Free activation energies and reaction energies for (3+2) cycloadditions (energies in kcal/mol).

| Free energy profile for (3+2) cycloaddition |                     |                         |            |                     |                         |
|---------------------------------------------|---------------------|-------------------------|------------|---------------------|-------------------------|
| diene                                       | $\Delta G^\ddagger$ | $\Delta G_{\text{rxn}}$ | diene      | $\Delta G^\ddagger$ | $\Delta G_{\text{rxn}}$ |
| <b>1a</b>                                   | 34.1                | -12.8                   | <b>2a</b>  | 34.5                | -12.0                   |
| <b>1b</b>                                   | 33.2                | -13.3                   | <b>2b</b>  | 34.2                | -12.0                   |
| <b>1c</b>                                   | 31.6                | -13.3                   | <b>2c</b>  | 32.0                | -13.5                   |
| <b>1d</b>                                   | 29.3                | -12.3                   | <b>2d</b>  | 30.6                | -6.0                    |
| <b>1e</b>                                   | 29.0                | -12.0                   | <b>2e</b>  | 30.9                | -10.1                   |
| <b>1f</b>                                   | 28.7                | -11.5                   | <b>2f</b>  | 30.8                | -9.4                    |
| <b>3a</b>                                   | 36.9                | -4.9                    | <b>4a</b>  | 33.9                | -4.6                    |
| <b>3b</b>                                   | 36.5                | -8.2                    | <b>4b</b>  | 33.3                | -14.6                   |
| <b>3c</b>                                   | 32.3                | -14.2                   | <b>4c</b>  | 31.3                | -15.0                   |
| <b>3d</b>                                   | 31.8                | -5.4                    | <b>4d</b>  | 29.6                | -14.6                   |
| <b>3e</b>                                   | 32.5                | -3.5                    | <b>4e</b>  | 29.1                | -14.5                   |
| <b>3f</b>                                   | 33.5                | -2.5                    | <b>4f</b>  | 28.9                | -13.9                   |
| <b>5a</b>                                   | 30.3                | -18.3                   | <b>6a</b>  | 36.0                | -9.1                    |
| <b>5b</b>                                   | 34.8                | -13.3                   | <b>6b</b>  | 35.3                | -14.9                   |
| <b>5c</b>                                   | 29.6                | -17.7                   | <b>6c</b>  | 34.1                | -15.1                   |
| <b>5d</b>                                   | 29.1                | -15.6                   | <b>6d</b>  | 32.0                | -14.8                   |
| <b>5e</b>                                   | 28.6                | -15.6                   | <b>6e</b>  | 31.6                | -14.8                   |
| <b>5f</b>                                   | 28.4                | -14.8                   | <b>6f</b>  | 31.6                | -13.9                   |
| <b>7a</b>                                   | 33.1                | -4.9                    |            |                     |                         |
| <b>7b</b>                                   | 29.5                | -8.6                    | <b>7ba</b> | 31.0                | -8.3                    |
| <b>7c</b>                                   | 25.9                | -9.4                    |            |                     |                         |
| <b>7d</b>                                   | 18.9                | -8.0                    |            |                     |                         |
| <b>7e</b>                                   | 18.5                | -7.9                    |            |                     |                         |
| <b>7f</b>                                   | 18.4                | -7.5                    |            |                     |                         |

**Table S2.** Free activation energies and reaction energies for [4+2] cycloadditions. (energies in kcal/mol).

| Free energy profile for [4+2] cycloaddition |                     |                         |            |                     |                         |
|---------------------------------------------|---------------------|-------------------------|------------|---------------------|-------------------------|
| diene                                       | $\Delta G^\ddagger$ | $\Delta G_{\text{rxn}}$ | diene      | $\Delta G^\ddagger$ | $\Delta G_{\text{rxn}}$ |
| <b>1a</b>                                   | 29.2                | 15.6                    | <b>2a</b>  | 25.3                | 15.0                    |
| <b>1b</b>                                   | 35.8                | 11.0                    | <b>2b</b>  | 32.0                | 17.0                    |
| <b>1c</b>                                   | 39.9                | 6.1                     | <b>2c</b>  | 36.6                | 6.8                     |
| <b>1d</b>                                   | 42.3                | 18.1                    | <b>2d</b>  | 39.1                | 19.0                    |
| <b>1e</b>                                   | 42.9                | 19.2                    | <b>2e</b>  | 40.0                | 20.3                    |
| <b>1f</b>                                   | 43.0                | 20.9                    | <b>2f</b>  | 40.2                | 21.9                    |
| <b>3a</b>                                   | 28.1                | 12.9                    | <b>4a</b>  | 23.2                | 6.9                     |
| <b>3b</b>                                   | 34.9                | 10.2                    | <b>4b</b>  | 31.0                | 9.0                     |
| <b>3c</b>                                   | 39.6                | 8.1                     | <b>4c</b>  | 35.8                | 4.3                     |
| <b>3d</b>                                   | 43.1                | 20.4                    | <b>4d</b>  | 38.2                | 18.4                    |
| <b>3e</b>                                   | 44.0                | 17.3                    | <b>4e</b>  | 39.0                | 13.4                    |
| <b>3f</b>                                   | 44.4                | 20.7                    | <b>4f</b>  | 39.5                | 19.3                    |
| <b>5a</b>                                   | 22.6                | 1.5                     | <b>6a</b>  | 23.9                | 15.0                    |
| <b>5b</b>                                   | 31.6                | 5.0                     | <b>6b</b>  | 31.6                | 13.7                    |
| <b>5c</b>                                   | 33.3                | -2.1                    | <b>6c</b>  | 36.6                | 10.7                    |
| <b>5d</b>                                   | 37.1                | 11.0                    | <b>6d</b>  | 38.7                | 22.4                    |
| <b>5e</b>                                   | 38.0                | 11.4                    | <b>6e</b>  | 39.7                | 19.8                    |
| <b>5f</b>                                   | 37.4                | 14.5                    | <b>6f</b>  | 40.5                | 26.0                    |
| <b>7a</b>                                   | 17.7                | -13.8                   |            |                     |                         |
| <b>7b</b>                                   | 22.4                | -17.6                   | <b>7ba</b> | 23.7                | -16.5                   |
| <b>7c</b>                                   | 25.6                | -23.2                   |            |                     |                         |
| <b>7d</b>                                   | 28.1                | -10.8                   |            |                     |                         |
| <b>7e</b>                                   | 29.1                | -9.6                    |            |                     |                         |
| <b>7f</b>                                   | 29.0                | -.67                    |            |                     |                         |

### 3. Details in Nucleus-Independent Chemical Shifts (NICS)

All the density functional theory (DFT) calculations (at 298K) were carried out by using the Gaussian 16 package<sup>1</sup>. Nucleus-independent chemical shifts (NMR=GIAO) calculations, performed at the M06-2X/6-311+G(d,p)//M06-2X/6-31G(d,p) level of theory. Each six-member (C2-C1'-C2'-C3'-C4'-C3) in **7a**–**7f** is denoted as ring A. Since ring A is a twisted ring, we first need to calculate the most representative plane based on the cartesian coordination using the least square method. Then coordinates of the points below and above 1 Angstrom of the plane can be obtained for the NMR jobs. Subsequently, with the aid of a powerful tool Multiwfn 3.8 program<sup>2</sup>, we attain the values of NICS(+1)zz (above the plane) and NICS(-1)zz (below the plane), and take the average values of NICS(+1)zz and NICS(-1)zz to afford the final NICS(1)zz value.

**Table S3.** NICS values of ring A in ground states, transition state, and cycloadduct.

|           | ground state | TS-[4+2] | [4+2]-product |
|-----------|--------------|----------|---------------|
| <b>7a</b> | -0.3         | -16.1    | -29.4         |
| <b>7b</b> | 3.0          | -17.6    | -30.0         |
| <b>7c</b> | 3.6          | -17.0    | -29.8         |
| <b>7d</b> | 1.8          | -17.7    | -29.9         |
| <b>7e</b> | 1.9          | -18.5    | -30.0         |
| <b>7f</b> | 2.2          | -17.0    | -29.9         |

#### 4. Benchmark for Various Atomic Charges

Table S4. ADCH charges of C1-C4 atoms

| dienes    | ADCH charges |        |        |        | dienes    | ADCH charges |        |        |        |
|-----------|--------------|--------|--------|--------|-----------|--------------|--------|--------|--------|
|           | C1           | C2     | C3     | C4     |           | C1           | C2     | C3     | C4     |
| <b>1a</b> | 0.001        | -0.113 | -0.060 | -0.133 | <b>2a</b> | -0.006       | -0.114 | -0.029 | -0.079 |
| <b>1b</b> | 0.042        | -0.096 | -0.052 | -0.115 | <b>2b</b> | 0.034        | -0.099 | -0.024 | -0.068 |
| <b>1c</b> | -0.089       | -0.049 | -0.049 | -0.089 | <b>2c</b> | -0.098       | -0.053 | -0.023 | -0.048 |
| <b>1d</b> | -0.064       | -0.014 | -0.043 | -0.062 | <b>2d</b> | -0.072       | -0.017 | -0.019 | -0.025 |
| <b>1e</b> | -0.063       | -0.006 | -0.041 | -0.057 | <b>2e</b> | -0.072       | -0.010 | -0.017 | -0.021 |
| <b>1f</b> | -0.025       | 0.007  | -0.038 | -0.052 | <b>2f</b> | -0.034       | 0.002  | -0.016 | -0.017 |
| <b>3a</b> | -0.012       | -0.113 | -0.028 | -0.072 | <b>4a</b> | -0.006       | -0.054 | -0.015 | -0.139 |
| <b>3b</b> | 0.027        | -0.100 | -0.023 | -0.063 | <b>4b</b> | 0.029        | -0.059 | -0.012 | -0.129 |
| <b>3c</b> | -0.105       | -0.054 | -0.022 | -0.045 | <b>4c</b> | -0.106       | -0.011 | -0.011 | -0.106 |
| <b>3d</b> | -0.077       | -0.018 | -0.018 | -0.023 | <b>4d</b> | -0.077       | 0.028  | -0.007 | -0.085 |
| <b>3e</b> | -0.077       | -0.011 | -0.016 | -0.019 | <b>4e</b> | -0.078       | 0.033  | -0.006 | -0.080 |
| <b>3f</b> | -0.039       | 0.001  | -0.015 | -0.016 | <b>4f</b> | -0.043       | 0.037  | -0.005 | -0.074 |
| <b>5a</b> | -0.012       | -0.026 | -0.006 | -0.118 | <b>6a</b> | -0.008       | -0.048 | -0.013 | -0.134 |
| <b>5b</b> | 0.022        | -0.050 | -0.006 | -0.118 | <b>6b</b> | 0.028        | -0.056 | -0.010 | -0.127 |
| <b>5c</b> | -0.108       | -0.002 | -0.002 | -0.108 | <b>6c</b> | -0.106       | -0.010 | -0.010 | -0.106 |
| <b>5d</b> | -0.078       | 0.036  | 0.001  | -0.090 | <b>6d</b> | -0.077       | 0.026  | -0.007 | -0.086 |
| <b>5e</b> | -0.079       | 0.041  | 0.002  | -0.086 | <b>6e</b> | -0.078       | 0.032  | -0.006 | -0.081 |
| <b>5f</b> | -0.044       | 0.044  | 0.003  | -0.081 | <b>6f</b> | -0.042       | 0.036  | -0.004 | -0.075 |
| <b>7a</b> | 0.030        | -0.067 | -0.026 | -0.151 |           |              |        |        |        |
| <b>7b</b> | 0.058        | -0.053 | -0.016 | -0.114 |           |              |        |        |        |
| <b>7c</b> | -0.081       | -0.014 | -0.014 | -0.081 |           |              |        |        |        |
| <b>7d</b> | -0.069       | 0.018  | -0.008 | -0.047 |           |              |        |        |        |
| <b>7e</b> | -0.072       | 0.022  | -0.006 | -0.042 |           |              |        |        |        |
| <b>7f</b> | -0.037       | 0.027  | -0.005 | -0.038 |           |              |        |        |        |



**Table S5. Chelpg charges of C1-C4 atoms**

| dienes    | Chelpg charge |        |        |        | dienes    | Chelpg charge |        |        |        |
|-----------|---------------|--------|--------|--------|-----------|---------------|--------|--------|--------|
|           | C1            | C2     | C3     | C4     |           | C1            | C2     | C3     | C4     |
| <b>1a</b> | 0.009         | -0.285 | -0.069 | -0.437 | <b>2a</b> | 0.061         | -0.377 | -0.005 | -0.364 |
| <b>1b</b> | 0.126         | -0.342 | 0.005  | -0.451 | <b>2b</b> | 0.182         | -0.444 | 0.048  | -0.329 |
| <b>1c</b> | -0.438        | -0.033 | -0.025 | -0.447 | <b>2c</b> | -0.385        | -0.131 | 0.015  | -0.365 |
| <b>1d</b> | -0.469        | 0.071  | -0.083 | -0.376 | <b>2d</b> | -0.388        | -0.054 | -0.032 | -0.284 |
| <b>1e</b> | -0.429        | 0.022  | -0.058 | -0.364 | <b>2e</b> | -0.360        | -0.079 | -0.004 | -0.282 |
| <b>1f</b> | -0.401        | 0.068  | -0.095 | -0.333 | <b>2f</b> | -0.316        | -0.068 | -0.016 | -0.274 |
| <b>3a</b> | 0.056         | -0.351 | -0.029 | -0.334 | <b>4a</b> | 0.018         | -0.236 | 0.098  | -0.592 |
| <b>3b</b> | 0.181         | -0.443 | 0.082  | -0.353 | <b>4b</b> | 0.075         | -0.236 | 0.077  | -0.589 |
| <b>3c</b> | -0.402        | -0.107 | 0.016  | -0.343 | <b>4c</b> | -0.536        | 0.095  | 0.091  | -0.532 |
| <b>3d</b> | -0.393        | -0.030 | -0.038 | -0.267 | <b>4d</b> | -0.566        | 0.198  | 0.043  | -0.482 |
| <b>3e</b> | -0.356        | -0.078 | -0.000 | -0.281 | <b>4e</b> | -0.539        | 0.171  | 0.050  | -0.474 |
| <b>3f</b> | -0.314        | -0.067 | -0.006 | -0.281 | <b>4f</b> | -0.458        | 0.145  | 0.067  | -0.483 |
| <b>5a</b> | 0.054         | -0.222 | 0.136  | -0.541 | <b>6a</b> | 0.047         | -0.273 | 0.161  | -0.623 |
| <b>5b</b> | 0.082         | -0.244 | 0.098  | -0.528 | <b>6b</b> | 0.086         | -0.242 | 0.125  | -0.574 |
| <b>5c</b> | -0.491        | 0.092  | 0.112  | -0.511 | <b>6c</b> | -0.542        | 0.124  | 0.111  | -0.542 |
| <b>5d</b> | -0.561        | 0.220  | 0.065  | -0.462 | <b>6d</b> | -0.568        | 0.193  | 0.076  | -0.498 |
| <b>5e</b> | -0.524        | 0.183  | 0.070  | -0.444 | <b>6e</b> | -0.535        | 0.168  | 0.094  | -0.493 |
| <b>5f</b> | -0.472        | 0.173  | 0.031  | -0.428 | <b>6f</b> | -0.466        | 0.181  | 0.068  | -0.459 |
| <b>7a</b> | -0.164        | -0.028 | 0.323  | -0.713 |           |               |        |        |        |
| <b>7b</b> | 0.046         | -0.036 | 0.256  | -0.642 |           |               |        |        |        |
| <b>7c</b> | -0.548        | 0.236  | 0.216  | -0.548 |           |               |        |        |        |
| <b>7d</b> | -0.620        | 0.348  | 0.147  | -0.453 |           |               |        |        |        |
| <b>7e</b> | -0.593        | 0.320  | 0.157  | -0.445 |           |               |        |        |        |
| <b>7f</b> | -0.574        | 0.356  | 0.140  | -0.435 |           |               |        |        |        |

**Table S6. Hirshfeld charges of C1-C4 atoms**

| dienes    | Hirshfeld charges |        |        |        | dienes    | Hirshfeld charges |        |        |        |
|-----------|-------------------|--------|--------|--------|-----------|-------------------|--------|--------|--------|
|           | C1                | C2     | C3     | C4     |           | C1                | C2     | C3     | C4     |
| <b>1a</b> | 0.001             | -0.113 | -0.060 | -0.133 | <b>2a</b> | -0.006            | -0.114 | -0.029 | -0.079 |
| <b>1b</b> | 0.042             | -0.096 | -0.052 | -0.115 | <b>2b</b> | 0.034             | -0.099 | -0.024 | -0.068 |
| <b>1c</b> | -0.089            | -0.049 | -0.049 | -0.089 | <b>2c</b> | -0.098            | -0.053 | -0.023 | -0.048 |
| <b>1d</b> | -0.064            | -0.014 | -0.043 | -0.062 | <b>2d</b> | -0.072            | -0.017 | -0.019 | -0.025 |
| <b>1e</b> | -0.063            | -0.006 | -0.041 | -0.057 | <b>2e</b> | -0.072            | -0.010 | -0.017 | -0.021 |
| <b>1f</b> | -0.025            | 0.007  | -0.038 | -0.052 | <b>2f</b> | -0.034            | 0.002  | -0.016 | -0.017 |
| <b>3a</b> | -0.012            | -0.113 | -0.028 | -0.072 | <b>4a</b> | -0.006            | -0.054 | -0.015 | -0.139 |
| <b>3b</b> | 0.027             | -0.100 | -0.023 | -0.063 | <b>4b</b> | 0.029             | -0.059 | -0.012 | -0.129 |
| <b>3c</b> | -0.105            | -0.054 | -0.022 | -0.045 | <b>4c</b> | -0.106            | -0.011 | -0.011 | -0.106 |
| <b>3d</b> | -0.077            | -0.018 | -0.018 | -0.023 | <b>4d</b> | -0.077            | 0.028  | -0.007 | -0.085 |
| <b>3e</b> | -0.077            | -0.011 | -0.016 | -0.019 | <b>4e</b> | -0.078            | 0.033  | -0.006 | -0.080 |
| <b>3f</b> | -0.039            | 0.001  | -0.015 | -0.016 | <b>4f</b> | -0.043            | 0.037  | -0.005 | -0.074 |
| <b>5a</b> | -0.012            | -0.026 | -0.006 | -0.118 | <b>6a</b> | -0.008            | -0.048 | -0.013 | -0.134 |
| <b>5b</b> | 0.022             | -0.050 | -0.006 | -0.118 | <b>6b</b> | 0.028             | -0.056 | -0.010 | -0.127 |
| <b>5c</b> | -0.108            | -0.002 | -0.002 | -0.108 | <b>6c</b> | -0.106            | -0.010 | -0.010 | -0.106 |
| <b>5d</b> | -0.078            | 0.036  | 0.001  | -0.090 | <b>6d</b> | -0.077            | 0.026  | -0.007 | -0.086 |
| <b>5e</b> | -0.079            | 0.041  | 0.002  | -0.086 | <b>6e</b> | -0.078            | 0.032  | -0.006 | -0.081 |
| <b>5f</b> | -0.044            | 0.044  | 0.003  | -0.081 | <b>6f</b> | -0.042            | 0.036  | -0.004 | -0.075 |
| <b>7a</b> | 0.030             | -0.067 | -0.026 | -0.151 |           |                   |        |        |        |
| <b>7b</b> | 0.058             | -0.053 | -0.016 | -0.114 |           |                   |        |        |        |
| <b>7c</b> | -0.081            | -0.014 | -0.014 | -0.081 |           |                   |        |        |        |
| <b>7d</b> | -0.069            | 0.018  | -0.008 | -0.047 |           |                   |        |        |        |
| <b>7e</b> | -0.072            | 0.022  | -0.006 | -0.042 |           |                   |        |        |        |
| <b>7f</b> | -0.037            | 0.027  | -0.005 | -0.038 |           |                   |        |        |        |

**Table S7. NPA charges of C1-C4 atoms**

| dienes    | NPA charges |        |        |        | dienes    | NPA charges |        |        |        |
|-----------|-------------|--------|--------|--------|-----------|-------------|--------|--------|--------|
|           | C1          | C2     | C3     | C4     |           | C1          | C2     | C3     | C4     |
| <b>1a</b> | 0.067       | -0.381 | -0.212 | -0.452 | <b>2a</b> | 0.053       | -0.363 | -0.047 | -0.232 |
| <b>1b</b> | 0.199       | -0.376 | -0.219 | -0.424 | <b>2b</b> | 0.187       | -0.361 | -0.054 | -0.212 |
| <b>1c</b> | -0.377      | -0.240 | -0.240 | -0.377 | <b>2c</b> | -0.394      | -0.224 | -0.076 | -0.172 |
| <b>1d</b> | -0.320      | -0.138 | -0.253 | -0.330 | <b>2d</b> | -0.335      | -0.122 | -0.091 | -0.125 |
| <b>1e</b> | -0.335      | -0.131 | -0.257 | -0.323 | <b>2e</b> | -0.351      | -0.115 | -0.095 | -0.120 |
| <b>1f</b> | -0.348      | -0.116 | -0.260 | -0.317 | <b>2f</b> | -0.364      | -0.101 | -0.098 | -0.113 |
| <b>3a</b> | 0.039       | -0.349 | -0.051 | -0.217 | <b>4a</b> | 0.055       | -0.142 | -0.022 | -0.449 |
| <b>3b</b> | 0.173       | -0.351 | -0.058 | -0.200 | <b>4b</b> | 0.195       | -0.187 | -0.024 | -0.431 |
| <b>3c</b> | -0.409      | -0.215 | -0.080 | -0.163 | <b>4c</b> | -0.389      | -0.049 | -0.049 | -0.389 |
| <b>3d</b> | -0.350      | -0.112 | -0.093 | -0.119 | <b>4d</b> | -0.336      | 0.071  | -0.060 | -0.355 |
| <b>3e</b> | -0.365      | -0.106 | -0.096 | -0.114 | <b>4e</b> | -0.352      | 0.076  | -0.063 | -0.347 |
| <b>3f</b> | -0.378      | -0.093 | -0.099 | -0.108 | <b>4f</b> | -0.368      | 0.082  | -0.068 | -0.336 |
| <b>5a</b> | 0.021       | -0.084 | -0.025 | -0.414 | <b>6a</b> | 0.048       | -0.130 | -0.020 | -0.443 |
| <b>5b</b> | 0.181       | -0.178 | -0.020 | -0.419 | <b>6b</b> | 0.193       | -0.183 | -0.018 | -0.432 |
| <b>5c</b> | -0.399      | -0.040 | -0.040 | -0.399 | <b>6c</b> | -0.392      | -0.045 | -0.045 | -0.392 |
| <b>5d</b> | -0.343      | 0.079  | -0.051 | -0.370 | <b>6d</b> | -0.339      | 0.072  | -0.055 | -0.358 |
| <b>5e</b> | -0.359      | 0.084  | -0.054 | -0.364 | <b>6e</b> | -0.355      | 0.078  | -0.058 | -0.351 |
| <b>5f</b> | -0.374      | 0.090  | -0.060 | -0.354 | <b>6f</b> | -0.369      | 0.083  | -0.064 | -0.340 |
| <b>7a</b> | 0.134       | -0.231 | -0.065 | -0.477 |           |             |        |        |        |
| <b>7b</b> | 0.234       | -0.207 | -0.075 | -0.404 |           |             |        |        |        |
| <b>7c</b> | -0.341      | -0.100 | -0.100 | -0.341 |           |             |        |        |        |
| <b>7d</b> | -0.309      | 0.006  | -0.111 | -0.284 |           |             |        |        |        |
| <b>7e</b> | -0.329      | 0.012  | -0.114 | -0.276 |           |             |        |        |        |
| <b>7f</b> | -0.344      | 0.020  | -0.118 | -0.269 |           |             |        |        |        |

**Table S8. VDD charges of C1-C4 atoms**

| dienes    | VDD charge |        |        |        | dienes    | VDD charge |        |        |        |
|-----------|------------|--------|--------|--------|-----------|------------|--------|--------|--------|
|           | C1         | C2     | C3     | C4     |           | C1         | C2     | C3     | C4     |
| <b>1a</b> | 0.008      | -0.133 | -0.055 | -0.114 | <b>2a</b> | -0.000     | -0.132 | -0.041 | -0.091 |
| <b>1b</b> | 0.043      | -0.125 | -0.052 | -0.099 | <b>2b</b> | 0.035      | -0.122 | -0.038 | -0.080 |
| <b>1c</b> | -0.077     | -0.058 | -0.058 | -0.077 | <b>2c</b> | -0.084     | -0.057 | -0.044 | -0.061 |
| <b>1d</b> | -0.095     | -0.020 | -0.058 | -0.059 | <b>2d</b> | -0.101     | -0.019 | -0.044 | -0.039 |
| <b>1e</b> | -0.092     | -0.011 | -0.058 | -0.054 | <b>2e</b> | -0.098     | -0.011 | -0.046 | -0.035 |
| <b>1f</b> | -0.065     | -0.004 | -0.057 | -0.051 | <b>2f</b> | -0.071     | -0.007 | -0.045 | -0.032 |
| <b>3a</b> | -0.008     | -0.133 | -0.044 | -0.082 | <b>4a</b> | -0.002     | -0.089 | -0.022 | -0.123 |
| <b>3b</b> | 0.025      | -0.123 | -0.042 | -0.074 | <b>4b</b> | 0.028      | -0.096 | -0.021 | -0.118 |
| <b>3c</b> | -0.094     | -0.059 | -0.048 | -0.056 | <b>4c</b> | -0.098     | -0.024 | -0.024 | -0.098 |
| <b>3d</b> | -0.109     | -0.019 | -0.045 | -0.035 | <b>4d</b> | -0.109     | 0.022  | -0.028 | -0.080 |
| <b>3e</b> | -0.106     | -0.012 | -0.046 | -0.031 | <b>4e</b> | -0.106     | 0.031  | -0.028 | -0.079 |
| <b>3f</b> | -0.081     | -0.005 | -0.047 | -0.026 | <b>4f</b> | -0.080     | 0.029  | -0.029 | -0.073 |
| <b>5a</b> | -0.013     | -0.054 | -0.026 | -0.108 | <b>6a</b> | -0.006     | -0.079 | -0.020 | -0.119 |
| <b>5b</b> | 0.023      | -0.092 | -0.019 | -0.103 | <b>6b</b> | 0.024      | -0.094 | -0.017 | -0.115 |
| <b>5c</b> | -0.098     | -0.021 | -0.020 | -0.098 | <b>6c</b> | -0.098     | -0.020 | -0.020 | -0.098 |
| <b>5d</b> | -0.108     | 0.024  | -0.021 | -0.083 | <b>6d</b> | -0.110     | 0.022  | -0.026 | -0.082 |
| <b>5e</b> | -0.108     | 0.033  | -0.021 | -0.079 | <b>6e</b> | -0.109     | 0.030  | -0.023 | -0.079 |
| <b>5f</b> | -0.083     | 0.034  | -0.021 | -0.076 | <b>6f</b> | -0.081     | 0.033  | -0.024 | -0.076 |
| <b>7a</b> | 0.035      | -0.103 | -0.021 | -0.125 |           |            |        |        |        |
| <b>7b</b> | 0.057      | -0.079 | -0.017 | -0.100 |           |            |        |        |        |
| <b>7c</b> | -0.073     | -0.020 | -0.020 | -0.073 |           |            |        |        |        |
| <b>7d</b> | -0.096     | 0.018  | -0.019 | -0.044 |           |            |        |        |        |
| <b>7e</b> | -0.096     | 0.027  | -0.018 | -0.041 |           |            |        |        |        |
| <b>7f</b> | -0.071     | 0.029  | -0.016 | -0.038 |           |            |        |        |        |

**Table S9.** Benchmark for linear correlations between various atomic charges of C4 atm of dienes and activation barriers for (3+2) cycloaddition.

| CHG       | dienes       | Linear regression equation                            | R <sup>2</sup> | CHG | dienes       | Linear regression equation                            | R <sup>2</sup> |
|-----------|--------------|-------------------------------------------------------|----------------|-----|--------------|-------------------------------------------------------|----------------|
| ADCH      | <b>1a-1f</b> | $\Delta G_{3+2}^\ddagger = -75.48\text{CHG} + 11.99$  | 1.00           | NPA | <b>1a-1f</b> | $\Delta G_{3+2}^\ddagger = -40.55\text{CHG} + 15.96$  | 0.99           |
|           | <b>2a-2f</b> | $\Delta G_{3+2}^\ddagger = -72.06\text{CHG} + 19.06$  | 0.74           |     | <b>2a-2f</b> | $\Delta G_{3+2}^\ddagger = -33.87\text{CHG} + 26.67$  | 0.96           |
|           | <b>3a-3f</b> | $\Delta G_{3+2}^\ddagger = -18.41\text{CHG} + 31.65$  | 0.01           |     | <b>3a-3f</b> | $\Delta G_{3+2}^\ddagger = -39.81\text{CHG} + 27.81$  | 0.71           |
|           | <b>4a-4f</b> | $\Delta G_{3+2}^\ddagger = -27.13\text{CHG} + 26.48$  | 0.71           |     | <b>4a-4f</b> | $\Delta G_{3+2}^\ddagger = -46.46\text{CHG} + 13.15$  | 1.00           |
|           | <b>5a-5f</b> | $\Delta G_{3+2}^\ddagger = -12.97\text{CHG} + 29.89$  | 0.64           |     | <b>5a-5f</b> | $\Delta G_{3+2}^\ddagger = -67.70\text{CHG} + 3.96$   | 0.61           |
|           | <b>6a-6f</b> | $\Delta G_{3+2}^\ddagger = -8.06\text{CHG} + 32.17$   | 0.55           |     | <b>6a-6f</b> | $\Delta G_{3+2}^\ddagger = -44.59\text{CHG} + 16.22$  | 0.98           |
|           | <b>7a-7f</b> | $\Delta G_{3+2}^\ddagger = -66.84\text{CHG} + 12.41$  | 0.89           |     | <b>7a-7f</b> | $\Delta G_{3+2}^\ddagger = -75.04\text{CHG} - 1.60$   | 0.97           |
| ChelpG    | <b>1a-1f</b> | $\Delta G_{3+2}^\ddagger = -41.67\text{CHG} + 14.26$  | 0.81           | VDD | <b>1a-1f</b> | $\Delta G_{3+2}^\ddagger = -88.80\text{CHG} + 24.26$  | 0.98           |
|           | <b>2a-2f</b> | $\Delta G_{3+2}^\ddagger = -31.85\text{CHG} + 22.09$  | 0.58           |     | <b>2a-2f</b> | $\Delta G_{3+2}^\ddagger = -68.87\text{CHG} + 28.29$  | 0.96           |
|           | <b>3a-3f</b> | $\Delta G_{3+2}^\ddagger = -66.84\text{CHG} + 12.4$   | 0.43           |     | <b>3a-3f</b> | $\Delta G_{3+2}^\ddagger = -77.43\text{CHG} + 29.99$  | 0.71           |
|           | <b>4a-4f</b> | $\Delta G_{3+2}^\ddagger = -66.84\text{CHG} + 12.4$   | 0.98           |     | <b>4a-4f</b> | $\Delta G_{3+2}^\ddagger = -101.71\text{CHG} + 21.34$ | 1.00           |
|           | <b>5a-5f</b> | $\Delta G_{3+2}^\ddagger = -34.32\text{CHG} + 13.46$  | 0.46           |     | <b>5a-5f</b> | $\Delta G_{3+2}^\ddagger = -117.80\text{CHG} + 19.39$ | 0.45           |
|           | <b>6a-6f</b> | $\Delta G_{3+2}^\ddagger = -31.55\text{CHG} + 16.66$  | 0.94           |     | <b>6a-6f</b> | $\Delta G_{3+2}^\ddagger = -103.76\text{CHG} + 23.59$ | 0.99           |
|           | <b>7a-7f</b> | $\Delta G_{3+2}^\ddagger = -54.47\text{CHG} - 5.32$   | 0.99           |     | <b>7a-7f</b> | $\Delta G_{3+2}^\ddagger = -176.44\text{CHG} + 11.67$ | 0.99           |
| Hirshfeld | <b>1a-1f</b> | $\Delta G_{3+2}^\ddagger = -69.05\text{CHG} + 25.14$  | 0.99           |     |              |                                                       |                |
|           | <b>2a-2f</b> | $\Delta G_{3+2}^\ddagger = -65.77\text{CHG} + 29.34$  | 0.96           |     |              |                                                       |                |
|           | <b>3a-3f</b> | $\Delta G_{3+2}^\ddagger = -77.18\text{CHG} + 30.86$  | 0.69           |     |              |                                                       |                |
|           | <b>4a-4f</b> | $\Delta G_{3+2}^\ddagger = -80.36\text{CHG} + 22.81$  | 1.00           |     |              |                                                       |                |
|           | <b>5a-5f</b> | $\Delta G_{3+2}^\ddagger = -107.73\text{CHG} + 8.68$  | 0.56           |     |              |                                                       |                |
|           | <b>6a-6f</b> | $\Delta G_{3+2}^\ddagger = -78.46\text{CHG} + 25.47$  | 0.99           |     |              |                                                       |                |
|           | <b>7a-7f</b> | $\Delta G_{3+2}^\ddagger = -138.06\text{CHG} + 13.17$ | 0.98           |     |              |                                                       |                |

**Table S10.** Benchmark for linear correlations between various atomic charges of C4 atm of dienes and activation barriers for (3+2) cycloaddition.

| CHG       | dienes       | Linear regression equation                            | R <sup>2</sup> | CHG | dienes       | Linear regression equation                           | R <sup>2</sup> |
|-----------|--------------|-------------------------------------------------------|----------------|-----|--------------|------------------------------------------------------|----------------|
| ADCH      | <b>1a-1f</b> | $\Delta G_{4+2}^\ddagger = 167.83\text{CHG} + 81.09$  | 0.89           | NPA | <b>1a-1f</b> | $\Delta G_{4+2}^\ddagger = 91.81\text{CHG} + 72.86$  | 0.92           |
|           | <b>2a-2f</b> | $\Delta G_{4+2}^\ddagger = 198.61\text{CHG} + 71.10$  | 0.49           |     | <b>2a-2f</b> | $\Delta G_{4+2}^\ddagger = 109.76\text{CHG} + 53.35$ | 0.91           |
|           | <b>3a-3f</b> | $\Delta G_{4+2}^\ddagger = 45.47\text{CHG} + 44.62$   | 0.01           |     | <b>3a-3f</b> | $\Delta G_{4+2}^\ddagger = 131.62\text{CHG} + 59.22$ | 0.93           |
|           | <b>4a-4f</b> | $\Delta G_{4+2}^\ddagger = 80.88\text{CHG} + 47.98$   | 0.75           |     | <b>4a-4f</b> | $\Delta G_{4+2}^\ddagger = 128.16\text{CHG} + 83.73$ | 0.90           |
|           | <b>5a-5f</b> | $\Delta G_{4+2}^\ddagger = 28.05\text{CHG} + 33.86$   | 0.50           |     | <b>5a-5f</b> | $\Delta G_{4+2}^\ddagger = 171.23\text{CHG} + 99.54$ | 0.65           |
|           | <b>6a-6f</b> | $\Delta G_{4+2}^\ddagger = 21.25\text{CHG} + 38.49$   | 0.36           |     | <b>6a-6f</b> | $\Delta G_{4+2}^\ddagger = 136.53\text{CHG} + 87.87$ | 0.87           |
|           | <b>7a-7f</b> | $\Delta G_{4+2}^\ddagger = 49.59\text{CHG} + 33.95$   | 0.98           |     | <b>7a-7f</b> | $\Delta G_{4+2}^\ddagger = 167.83\text{CHG} + 43.71$ | 0.99           |
| Chelpg    | <b>1a-1f</b> | $\Delta G_{4+2}^\ddagger = 77.41\text{CHG} + 69.92$   | 0.50           | VDD | <b>1a-1f</b> | $\Delta G_{4+2}^\ddagger = 203.87\text{CHG} + 54.28$ | 0.94           |
|           | <b>2a-2f</b> | $\Delta G_{4+2}^\ddagger = 107.39\text{CHG} + 69.50$  | 0.59           |     | <b>2a-2f</b> | $\Delta G_{4+2}^\ddagger = 224.85\text{CHG} + 48.20$ | 0.92           |
|           | <b>3a-3f</b> | $\Delta G_{4+2}^\ddagger = 127.18\text{CHG} + 78.42$  | 0.55           |     | <b>3a-3f</b> | $\Delta G_{4+2}^\ddagger = 261.07\text{CHG} + 52.24$ | 0.92           |
|           | <b>4a-4f</b> | $\Delta G_{4+2}^\ddagger = 105.78\text{CHG} + 90.02$  | 0.83           |     | <b>4a-4f</b> | $\Delta G_{4+2}^\ddagger = 275.69\text{CHG} + 60.69$ | 0.87           |
|           | <b>5a-5f</b> | $\Delta G_{4+2}^\ddagger = 106.70\text{CHG} + 85.15$  | 0.74           |     | <b>5a-5f</b> | $\Delta G_{4+2}^\ddagger = 383.28\text{CHG} + 68.28$ | 0.79           |
|           | <b>6a-6f</b> | $\Delta G_{4+2}^\ddagger = 101.77\text{CHG} + 89.26$  | 0.93           |     | <b>6a-6f</b> | $\Delta G_{4+2}^\ddagger = 314.67\text{CHG} + 65.01$ | 0.86           |
|           | <b>7a-7f</b> | $\Delta G_{4+2}^\ddagger = 38.25\text{CHG} + 45.94$   | 0.97           |     | <b>7a-7f</b> | $\Delta G_{4+2}^\ddagger = 124.41\text{CHG} + 34.05$ | 0.98           |
| Hirshfeld | <b>1a-1f</b> | $\Delta G_{4+2}^\ddagger = 156.58\text{CHG} + 52.11$  | 0.92           |     |              |                                                      |                |
|           | <b>2a-2f</b> | $\Delta G_{4+2}^\ddagger = 214.34\text{CHG} + 44.75$  | 0.91           |     |              |                                                      |                |
|           | <b>3a-3f</b> | $\Delta G_{4+2}^\ddagger = 258.163\text{CHG} + 49.28$ | 0.93           |     |              |                                                      |                |
|           | <b>4a-4f</b> | $\Delta G_{4+2}^\ddagger = 220.45\text{CHG} + 56.97$  | 0.89           |     |              |                                                      |                |
|           | <b>5a-5f</b> | $\Delta G_{4+2}^\ddagger = 295.82\text{CHG} + 62.97$  | 0.70           |     |              |                                                      |                |
|           | <b>6a-6f</b> | $\Delta G_{4+2}^\ddagger = 239.42\text{CHG} + 59.47$  | 0.87           |     |              |                                                      |                |
|           | <b>7a-7f</b> | $\Delta G_{4+2}^\ddagger = 98.22\text{CHG} + 33.06$   | 0.99           |     |              |                                                      |                |

To compare the performance of predicting cycloaddition reactivity with atomic charge, various population analysis approaches to calculate atomic charges have been employed, including atomic dipole moment corrected Hirshfeld atomic charges (ADCH)<sup>3</sup>, Chelpg ESP fitting<sup>4</sup>, Hirshfeld, natural population analysis (NPA)<sup>5</sup> and Voronoi deformation density (VDD)<sup>6</sup>. The atomic charges are obtained from Multiwfn at the M06-2X/6-311+G(d,p)-SMD(CH<sub>2</sub>Cl<sub>2</sub>)/M06-2X/6-31G(d,p) level of theory. As shown in Tables S4 and S5, the Hirshfeld and NPA charges have good and consistent performance in predicting (3+2) and [4+2] cycloaddition reactivity, and here we chose the Hirshfeld charge.

## 5. Activation Strain Model of Intermolecular (3+2) Cycloaddition

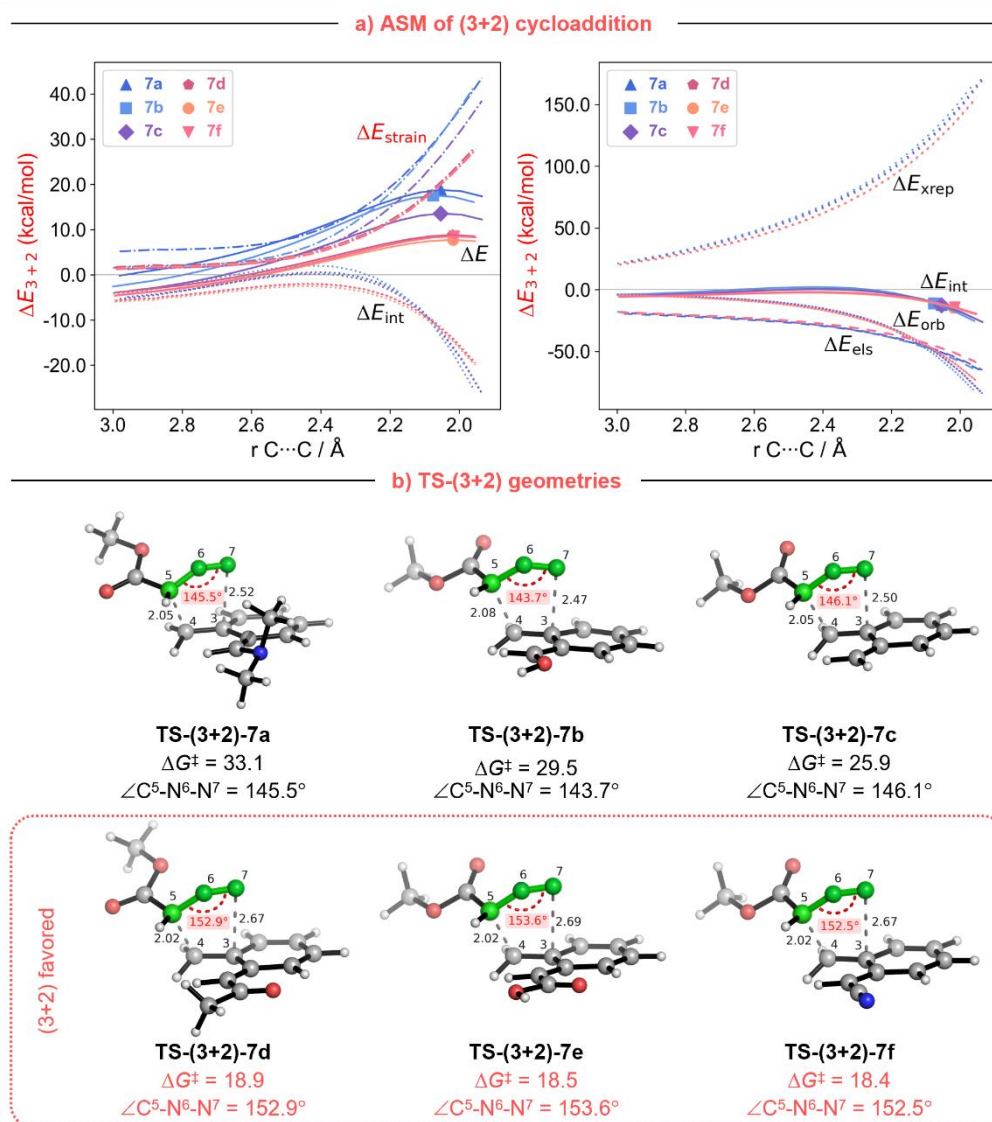

**Figure S2.** (a) Activation strain analysis and energy decomposition analysis of [4+2] cycloaddition between MDA and dienes (**7a–7f**) along the reaction coordinate projected onto the N $\cdots$ C bond stretch. (b) Transition geometries and free energy of activation ( $\Delta G^\ddagger_{298}$ ) (in kcal/mol) for (4+2) cycloadditions between MDA and dienes (**7a–7f**). Bond lengths in Å.

## 6. Activation Strain and Compete Energy Decomposition Diagrams of (3+2) and [4+2] Cycloadditions

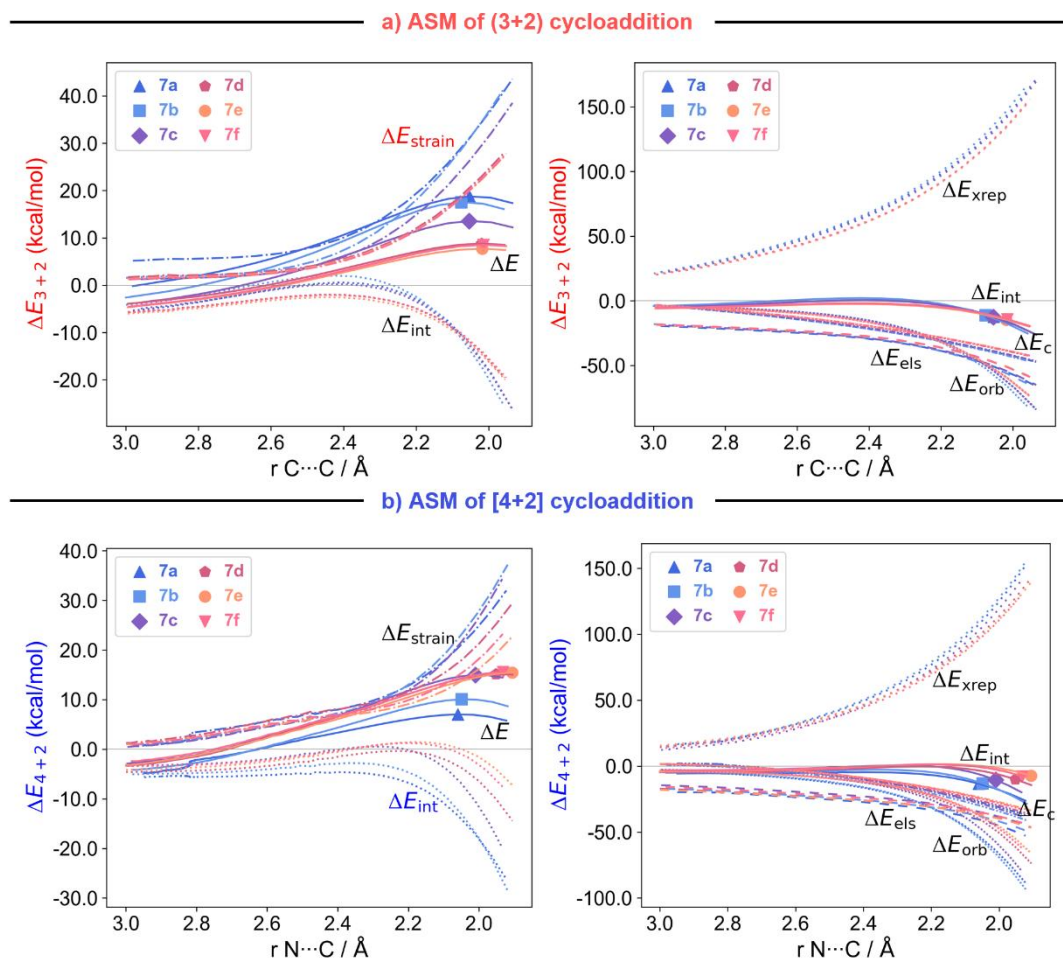

**Figure S3.** (a) Activation strain analysis and energy decomposition analysis of (3+2) cycloaddition between **MDA** and dienes (**7a–7f**) along the reaction coordinate projected onto the C···C bond stretch. (b) Activation strain analysis and energy decomposition analysis of [4+2] cycloaddition between **MDA** and dienes (**7a–7f**) along the reaction coordinate projected onto the N···C bond stretch.



## 7. Free Energy Profile of Light Excitation of 2-Methylbenzophenone to Afford Hydroxy-*o*-quinodimethane

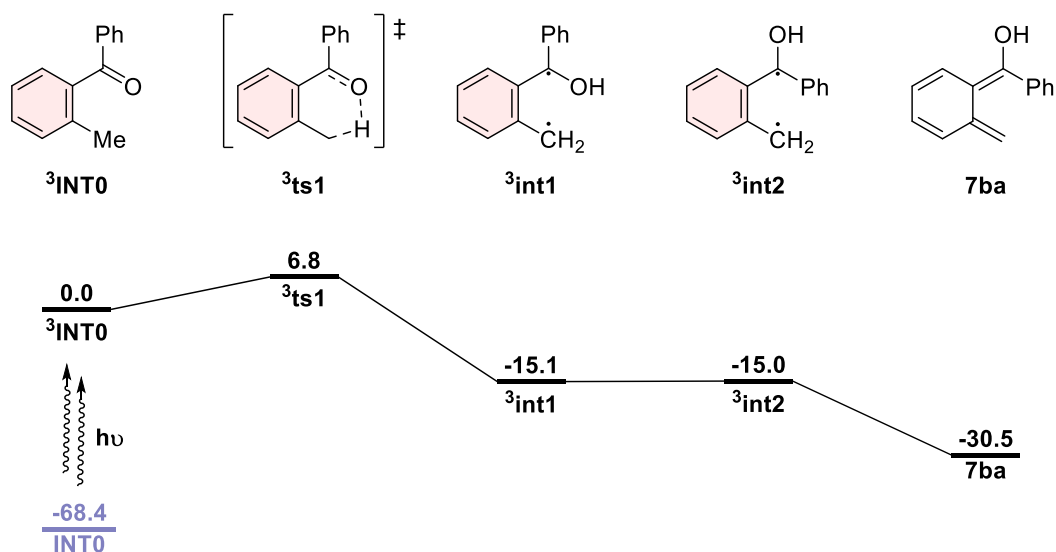

**Figure S4.** Free energy profile ( $\Delta G$  in kcal/mol) of light excitation of 2-methylbenzophenone. Computed at M06-2X/6-311+G(d,p)/SMD(CH<sub>2</sub>Cl<sub>2</sub>)/M06-2X/6-31G(d,p).

## 8. Equation of Calculation *ee* Values

The enantiomeric excess (*ee* %) can be computed using the following equation, where  $\Delta G^\ddagger$  is the difference in the Gibbs free energies (in kcal/mol) between the enantiomeric transition states; *R* is the gas constant (1.987 cal/(mol•K)); *T* is the temperature in K.

$$ee = \frac{1 - e^{\frac{-\Delta G_{R/S}^\ddagger}{RT}}}{1 + e^{\frac{-\Delta G_{R/S}^\ddagger}{RT}}} \times 100\%$$

## 9. Buried Volumes of CPA Catalysts

For the consistent quantification of the CPA pocket size, %*V*<sub>bur</sub> is used. To define the xyz axes, first the phosphorus atom defines as the center of the sphere, the middle point between the oxygen atom of the hydroxy group and the phosphoryl group oxygen atom defines the z axis, the oxygen atoms that connecting the backbone defines the xz-plane and the y axis is determined automatically. All the other parameters are set to default. Based on the definition above, the %*V*<sub>bur</sub> is visualized by SambVca 2.1<sup>7</sup>.

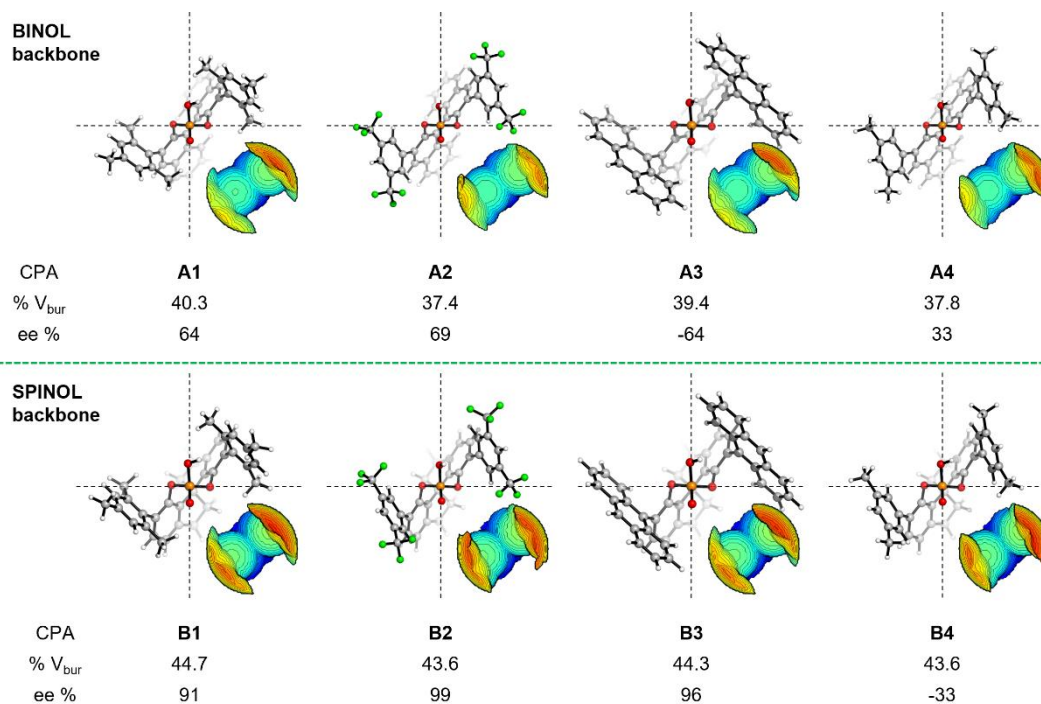

Figure S5. Buried volumes of CPA A1–B4 and the predicted ee values for (*S*)-7bb.

## 10. Space-Filling Models of Transition States for 7bb Enantiomers

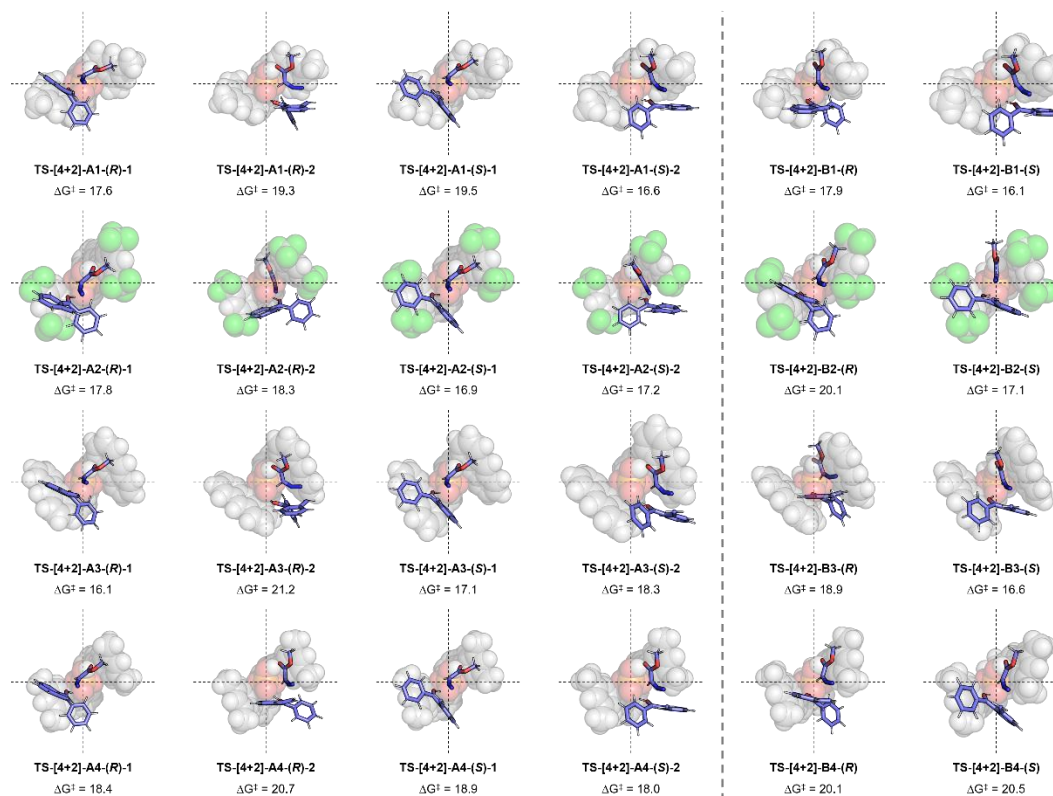

Figure S6. Space-filling models of transition states for 7bb enantiomers and the relative Gibbs free energy barriers for the 7bb enantiomers (in kcal/mol).

## 11. Possible transition states of CPA-catalyzed (3+2) and [4+2] cycloadditions

**Table S11.** Relative Gibbs free energy barrier for the (3+2) cycloaddition catalyzed by CPA **B2** and **B4**.

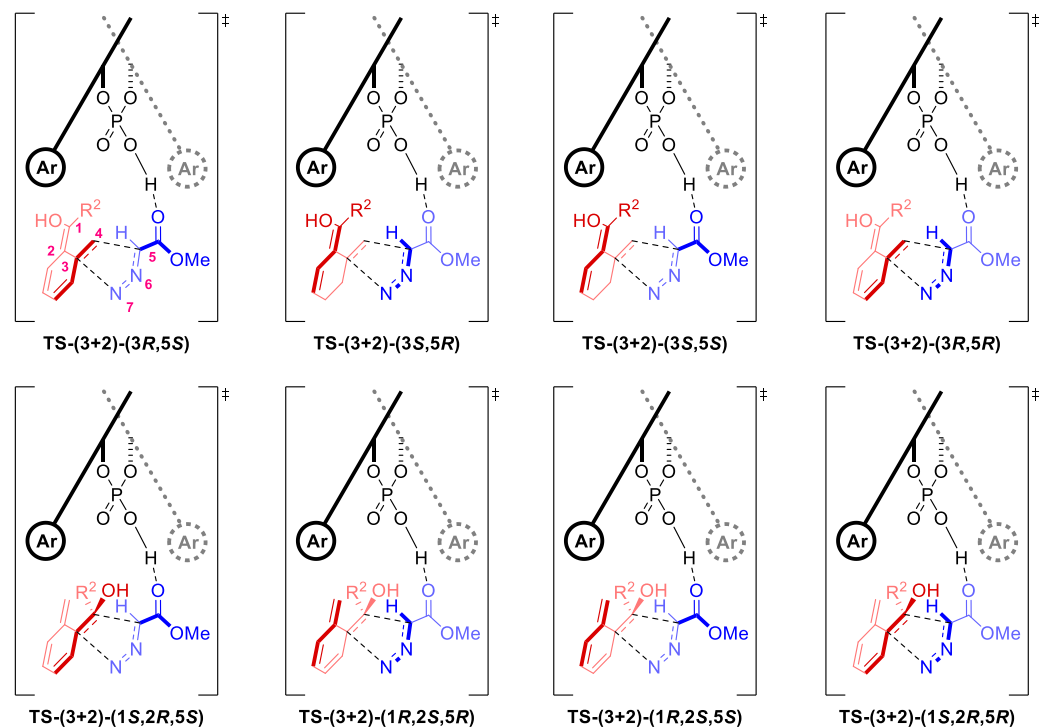

| TS-(3+2)   | $\Delta G^\ddagger$ (kcal/mol) |           |           |
|------------|--------------------------------|-----------|-----------|
|            | No CPA                         | <b>B2</b> | <b>B4</b> |
| (3R,5S)    | 31.2                           | 38.8      | 38.9      |
| (3S,5R)    | 31.2                           | 37.6      | 40.0      |
| (3S,5S)    | 31.0                           | 34.7      | 37.2      |
| (3R,5R)    | 31.0                           | 37.2      | 38.0      |
| (1S,2R,5S) | 36.2                           | 42.8      | 41.3      |
| (1R,2S,5R) | 36.2                           | 41.7      | 42.9      |
| (1R,2S,5S) | 37.7                           | 49.2      | 39.3      |
| (1S,2R,5R) | 37.7                           | 40.1      | 41.3      |

**Table S12.** Relative Gibbs free energy barrier for the [4+2] cycloaddition catalyzed by CPA **B2** and **B4**.

| TS-[4+2]       | $\Delta G^\ddagger$ (kcal/mol) |           |           |
|----------------|--------------------------------|-----------|-----------|
|                | No CPA                         | <b>B2</b> | <b>B4</b> |
| ( <i>R</i> )   | 23.7                           | 20.1      | 20.1      |
| ( <i>S</i> )   | 23.7                           | 17.1      | 20.5      |
| ( <i>R</i> )-2 | 25.9                           | 26.4      | 29.3      |
| ( <i>R</i> )-3 | 25.2                           | 26.2      | 27.8      |
| ( <i>S</i> )-2 | 25.9                           | 25.9      | 31.2      |
| ( <i>S</i> )-3 | 25.2                           | 24.7      | 27.9      |

## 12. Benchmark for Various DFT Methods

A variety of density functional methods were surveyed to confirm that our conclusions were not sensitive to the method used. The single-point energies were evaluated with the higher accuracy density functionals:  $\omega$ B97X-D3<sup>8</sup>,  $\omega$ B97M-V<sup>9</sup>,  $\omega$ B97M-D3BJ<sup>10</sup>,  $\omega$ B97M-D4<sup>11</sup>, and PWPB95-D3BJ<sup>12</sup> using the ORCA 5.0.3 program<sup>13</sup> for a comparison of the stereoselectivities (Table S13). The trends in enantioselectivities are consistent with each of the five DFT methods.

**Table S13.** Benchmark for various DFT methods using the def2-TZVP basis set. All numbers are given in kcal/mol.

|           | $\omega$ B97X-D3 | $\omega$ B97M-V | $\omega$ B97M-D3BJ | $\omega$ B97M-D4 | PWPB95-D3BJ |
|-----------|------------------|-----------------|--------------------|------------------|-------------|
| <b>A1</b> | 0.9              | 1.0             | 0.6                | 0.2              | 0.9         |
| <b>A2</b> | 0.1              | 0.3             | 0.0                | 0.3              | 0.7         |
| <b>A3</b> | -1.6             | -1.4            | -1.6               | -1.7             | -0.9        |
| <b>A4</b> | 0.4              | 0.6             | 0.3                | 0.1              | 1.0         |
| <b>B1</b> | 1.4              | 2.0             | 1.7                | 1.6              | 2.2         |
| <b>B2</b> | 2.7              | 2.8             | 2.2                | 2.6              | 2.5         |
| <b>B3</b> | 2.0              | 2.2             | 1.8                | 2.1              | 2.0         |
| <b>B4</b> | -1.2             | -1.4            | -1.7               | -1.6             | -1.2        |

### 13. Conformation Analysis of Possible (3+2) and [4+2] Cycloaddition Transition States

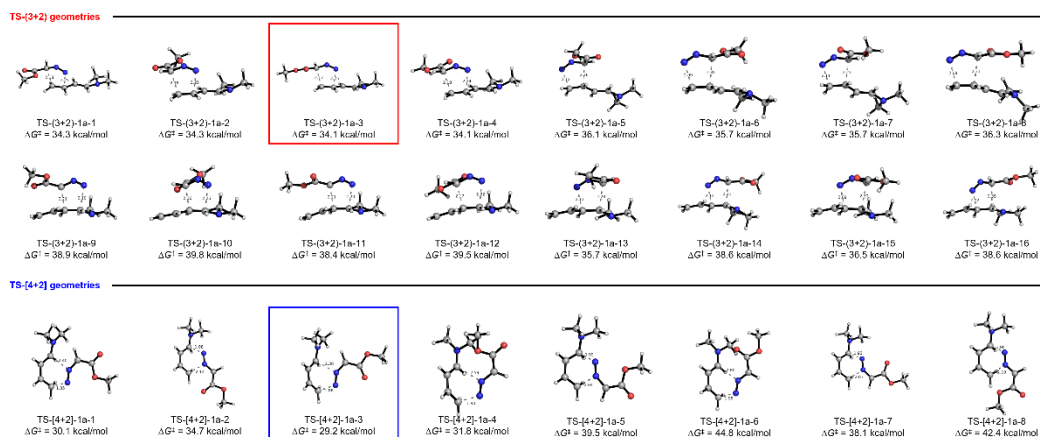

**Figure S7.** Free energies ( $\Delta G_{298}^\ddagger$ ) (in kcal/mol) of possible transition states of intermolecular (3+2) and [4+2] cycloadditions reactions between **1a** and **MDA** were calculated at the M06-2X/6-311+G(d,p)/SMD(CH<sub>2</sub>Cl<sub>2</sub>)/M06-2X/6-31G(d,p) level.

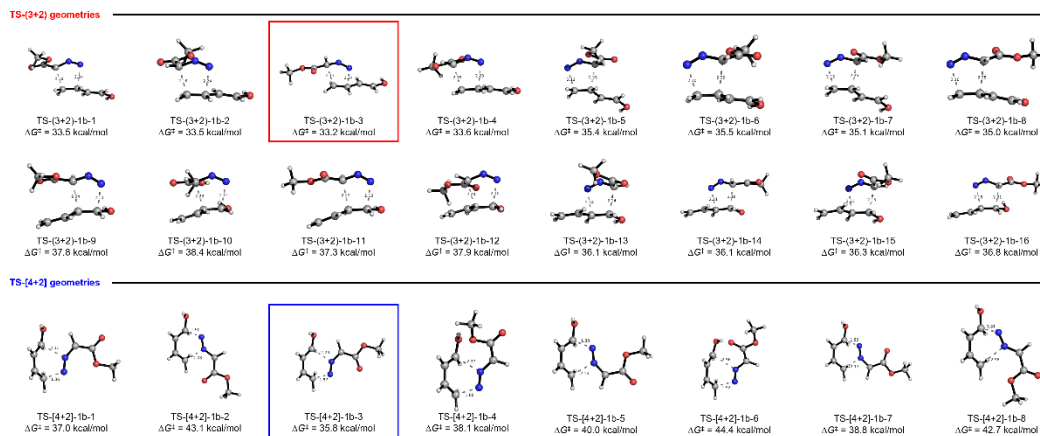

**Figure S8.** Free energies ( $\Delta G_{298}^\ddagger$ ) (in kcal/mol) of possible transition states of intermolecular (3+2) and [4+2] cycloadditions reactions between **1b** and **MDA** were calculated at the M06-2X/6-311+G(d,p)/SMD(CH<sub>2</sub>Cl<sub>2</sub>)/M06-2X/6-31G(d,p) level.

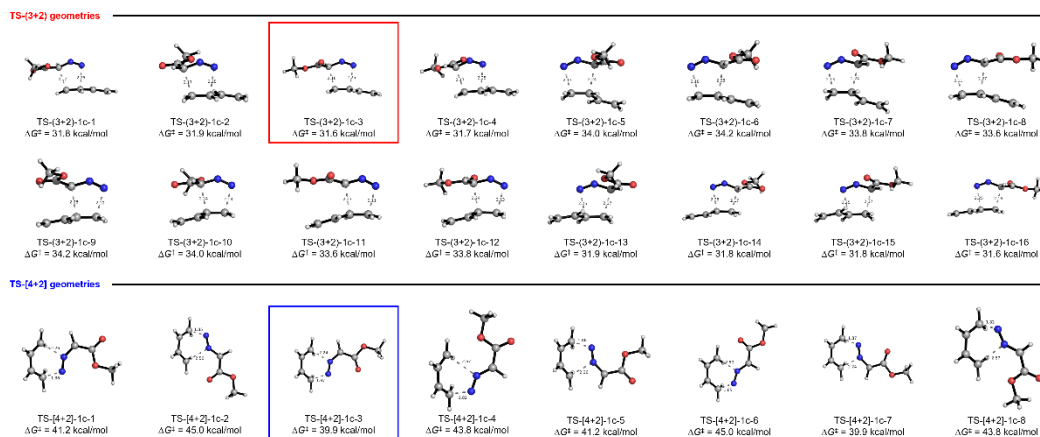

**Figure S9.** Free energies ( $\Delta G_{298}^\ddagger$ ) (in kcal/mol) of possible transition states of intermolecular (3+2) and [4+2] cycloadditions reactions between **1c** and **MDA** were calculated at the M06-2X/6-311+G(d,p)/SMD(CH<sub>2</sub>Cl<sub>2</sub>)/M06-2X/6-31G(d,p) level.

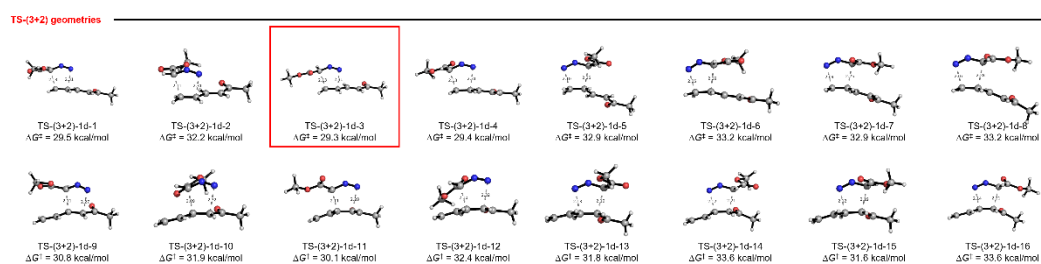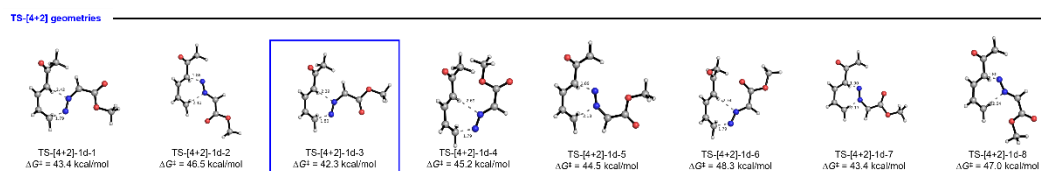

**Figure S10.** Free energies ( $\Delta G_{298}^\ddagger$ ) (in kcal/mol) of possible transition states of intermolecular (3+2) and [4+2] cycloadditions reactions between **1d** and **MDA** were calculated at the M06-2X/6-311+G(d,p)/SMD(CH<sub>2</sub>Cl<sub>2</sub>)/M06-2X/6-31G(d,p) level.

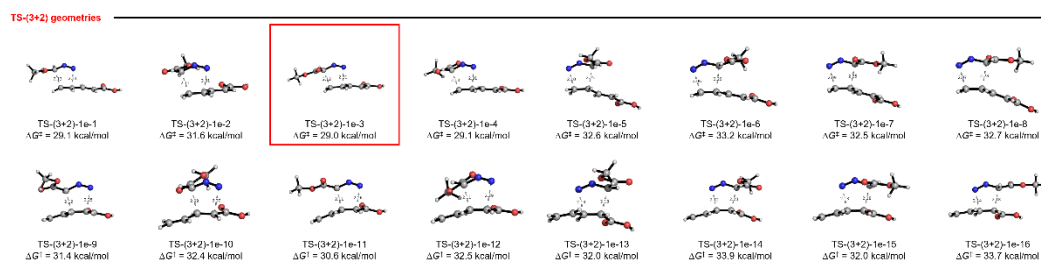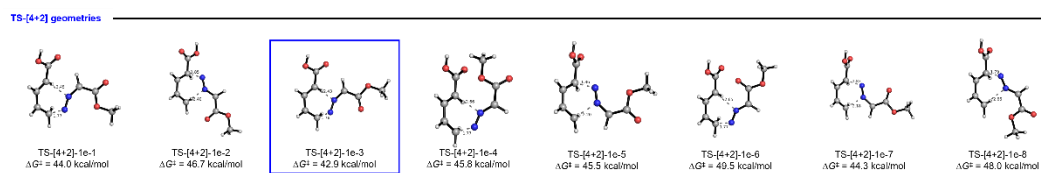

**Figure S11.** Free energies ( $\Delta G_{298}^\ddagger$ ) (in kcal/mol) of possible transition states of intermolecular (3+2) and [4+2] cycloadditions reactions between **1e** and **MDA** were calculated at the M06-2X/6-311+G(d,p)/SMD(CH<sub>2</sub>Cl<sub>2</sub>)/M06-2X/6-31G(d,p) level.

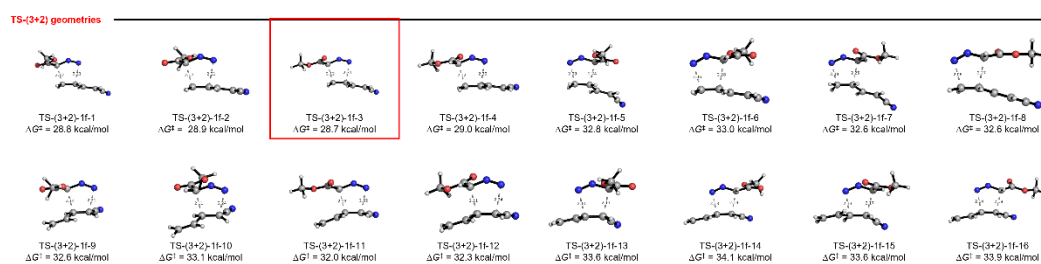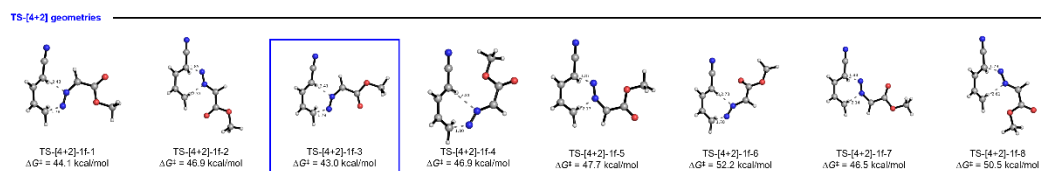

**Figure S12.** Free energies ( $\Delta G_{298}^\ddagger$ ) (in kcal/mol) of possible transition states of intermolecular (3+2) and [4+2] cycloadditions reactions between **1f** and **MDA** were calculated at the M06-2X/6-311+G(d,p)/SMD(CH<sub>2</sub>Cl<sub>2</sub>)/M06-2X/6-31G(d,p) level.

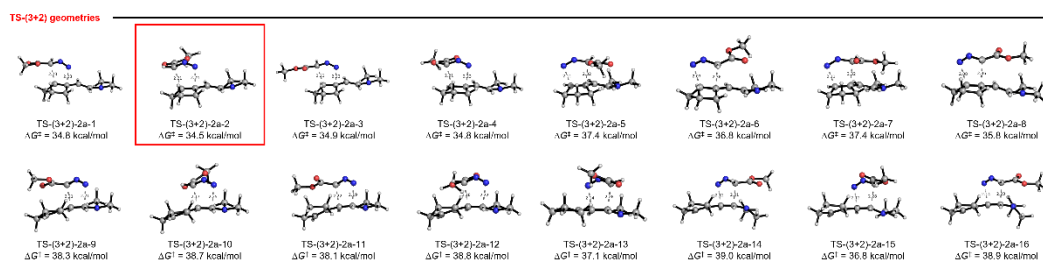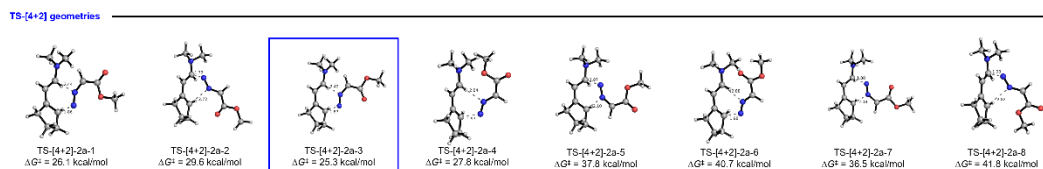

**Figure S13.** Free energies ( $\Delta G_{298}$ ) (in kcal/mol) of possible transition states of intermolecular (3+2) and [4+2] cycloadditions reactions between **2a** and **MDA** were calculated at the M06-2X/6-311+G(d,p)/SMD(CH<sub>2</sub>Cl<sub>2</sub>)/M06-2X/6-31G(d,p) level.

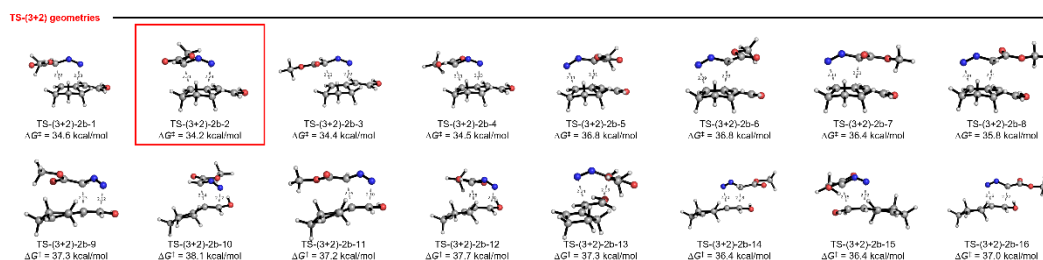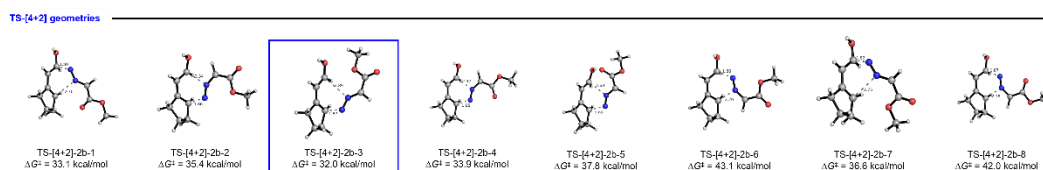

**Figure S14.** Free energies ( $\Delta G_{298}$ ) (in kcal/mol) of possible transition states of intermolecular (3+2) and [4+2] cycloadditions reactions between **2b** and **MDA** were calculated at the M06-2X/6-311+G(d,p)/SMD(CH<sub>2</sub>Cl<sub>2</sub>)/M06-2X/6-31G(d,p) level.

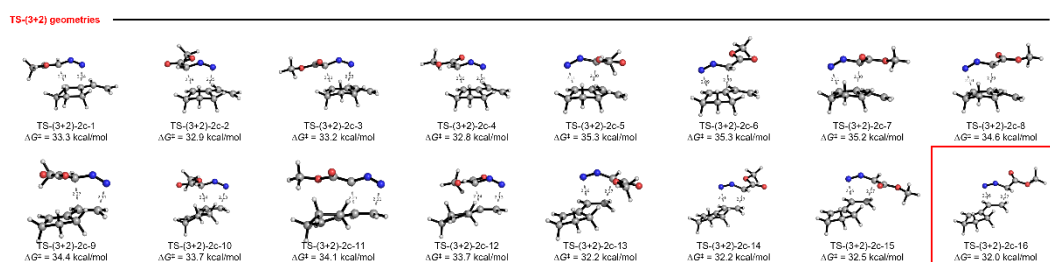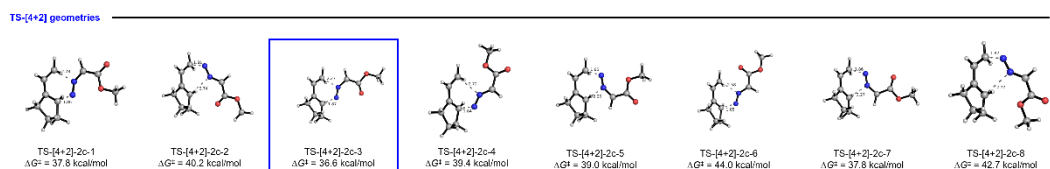

**Figure S15.** Free energies ( $\Delta G_{298}$ ) (in kcal/mol) of possible transition states of intermolecular (3+2) and [4+2] cycloadditions reactions between **2c** and **MDA** were calculated at the M06-2X/6-311+G(d,p)/SMD(CH<sub>2</sub>Cl<sub>2</sub>)/M06-2X/6-31G(d,p) level.



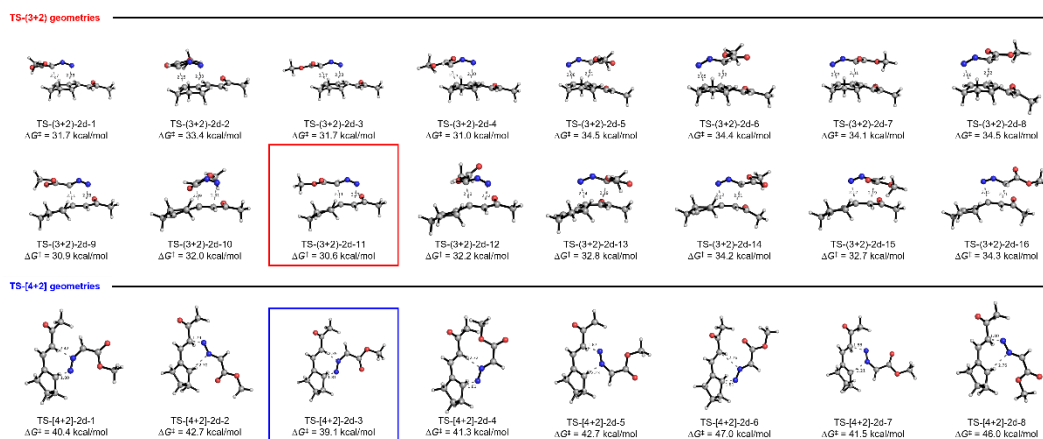

**Figure S16.** Free energies ( $\Delta G_{298}$ ) (in kcal/mol) of possible transition states of intermolecular (3+2) and [4+2] cycloadditions reactions between **2d** and **MDA** were calculated at the M06-2X/6-311+G(d,p)/SMD(CH<sub>2</sub>Cl<sub>2</sub>)/M06-2X/6-31G(d,p) level.

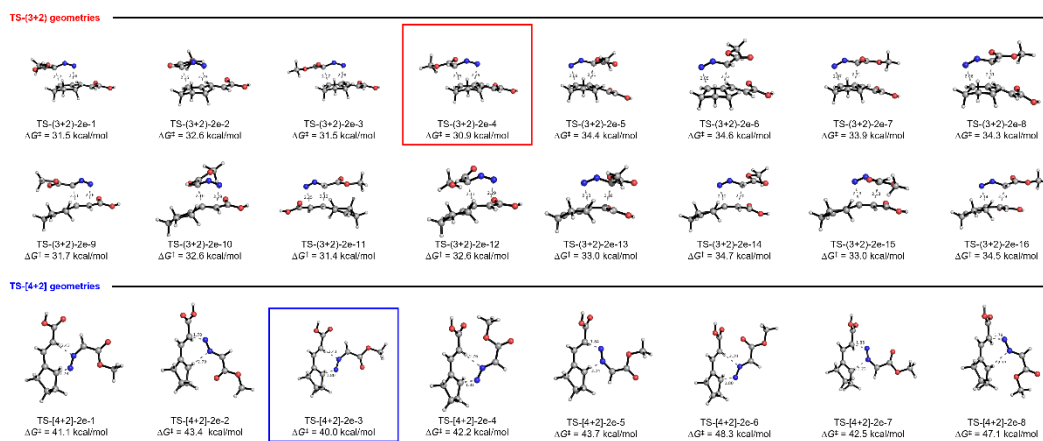

**Figure S17.** Free energies ( $\Delta G_{298}$ ) (in kcal/mol) of possible transition states of intermolecular (3+2) and [4+2] cycloadditions reactions between **2e** and **MDA** were calculated at the M06-2X/6-311+G(d,p)/SMD(CH<sub>2</sub>Cl<sub>2</sub>)/M06-2X/6-31G(d,p) level.

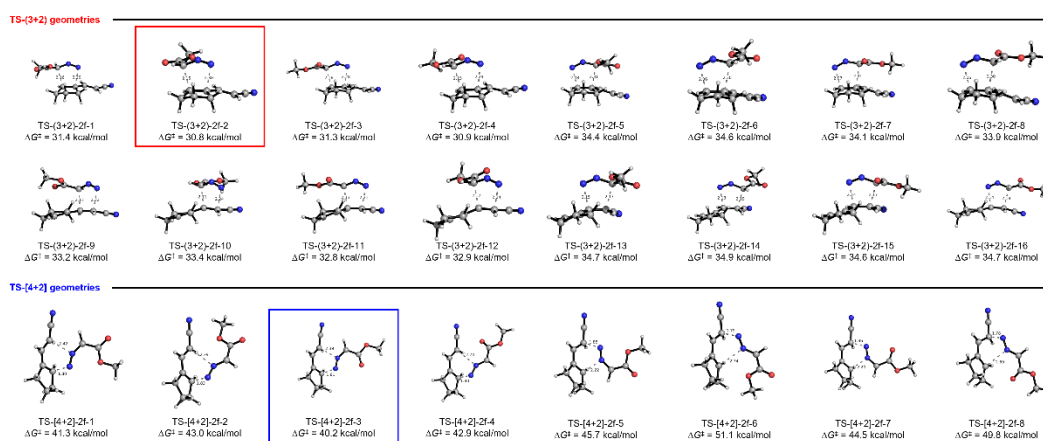

**Figure S18.** Free energies ( $\Delta G_{298}$ ) (in kcal/mol) of possible transition states of intermolecular (3+2) and [4+2] cycloadditions reactions between **2f** and **MDA** were calculated at the M06-2X/6-311+G(d,p)/SMD(CH<sub>2</sub>Cl<sub>2</sub>)/M06-2X/6-31G(d,p) level.

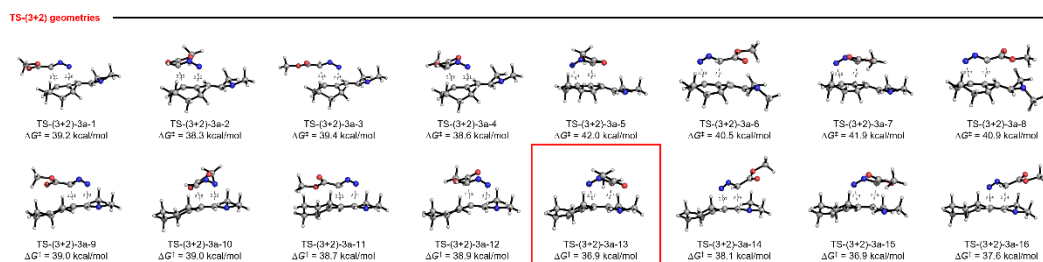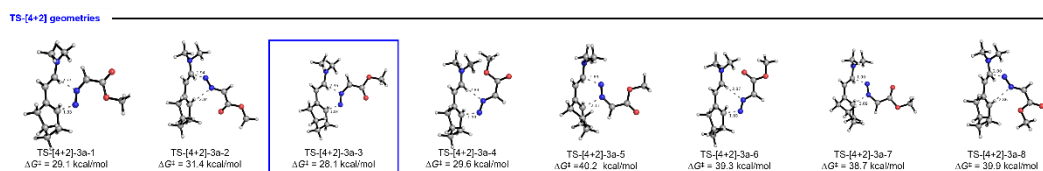

**Figure S19.** Free energies ( $\Delta G_{298}$ ) (in kcal/mol) of possible transition states of intermolecular (3+2) and [4+2] cycloadditions reactions between **3a** and **MDA** were calculated at the M06-2X/6-311+G(d,p)/SMD(CH<sub>2</sub>Cl<sub>2</sub>)/M06-2X/6-31G(d,p) level.

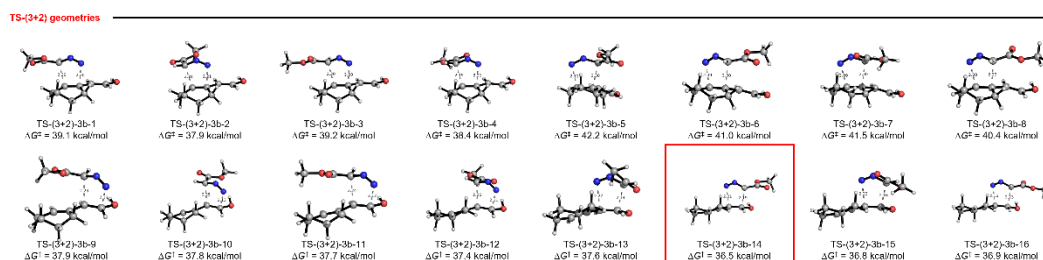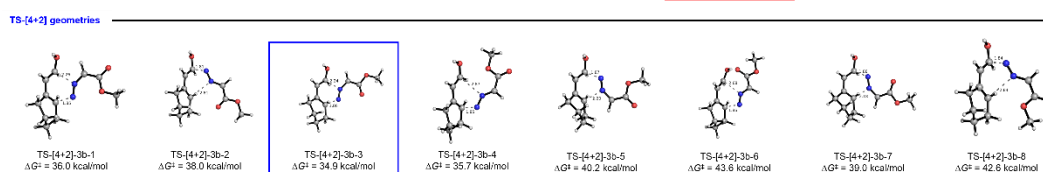

**Figure S20.** Free energies ( $\Delta G_{298}$ ) (in kcal/mol) of possible transition states of intermolecular (3+2) and [4+2] cycloadditions reactions between **3b** and **MDA** were calculated at the M06-2X/6-311+G(d,p)/SMD(CH<sub>2</sub>Cl<sub>2</sub>)/M06-2X/6-31G(d,p) level.

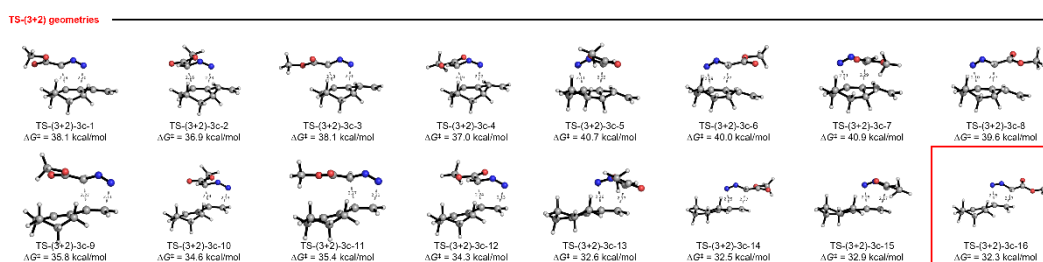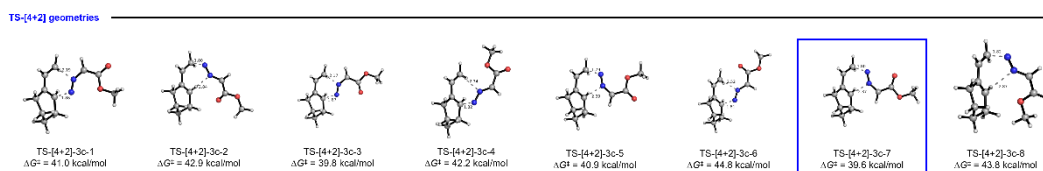

**Figure S21.** Free energies ( $\Delta G_{298}$ ) (in kcal/mol) of possible transition states of intermolecular (3+2) and [4+2] cycloadditions reactions between **3c** and **MDA** were calculated at the M06-2X/6-311+G(d,p)/SMD(CH<sub>2</sub>Cl<sub>2</sub>)/M06-2X/6-31G(d,p) level.

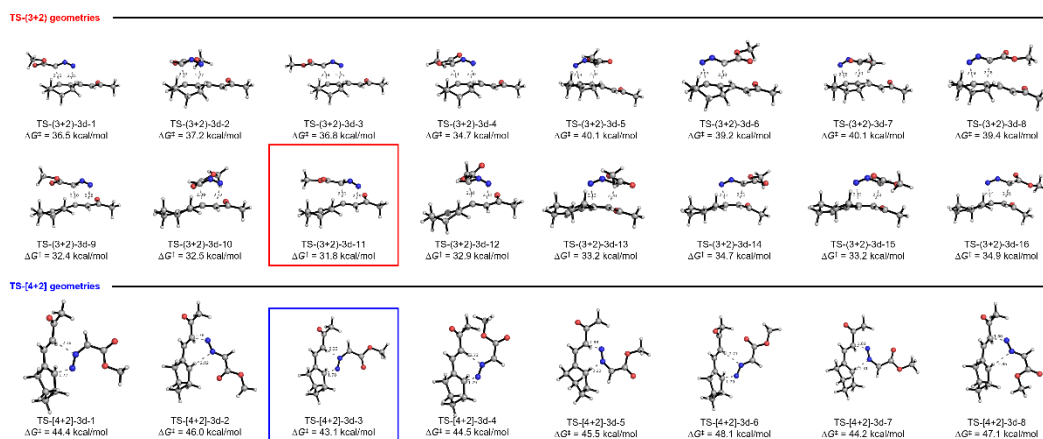

**Figure S22.** Free energies ( $\Delta G_{298}^\ddagger$ ) (in kcal/mol) of possible transition states of intermolecular (3+2) and [4+2] cycloadditions reactions between **3d** and **MDA** were calculated at the M06-2X/6-311+G(d,p)/SMD(CH<sub>2</sub>Cl<sub>2</sub>)/M06-2X/6-31G(d,p) level.

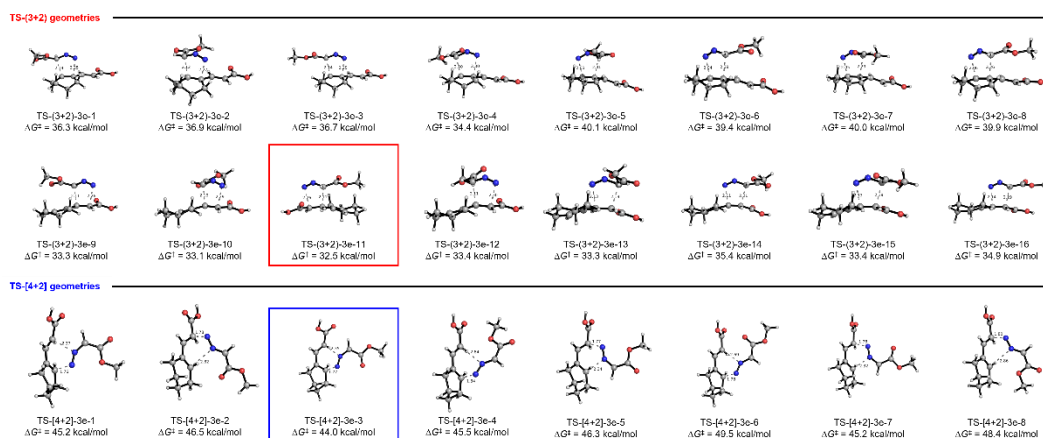

**Figure S23.** Free energies ( $\Delta G_{298}^\ddagger$ ) (in kcal/mol) of possible transition states of intermolecular (3+2) and [4+2] cycloadditions reactions between **3e** and **MDA** were calculated at the M06-2X/6-311+G(d,p)/SMD(CH<sub>2</sub>Cl<sub>2</sub>)/M06-2X/6-31G(d,p) level.

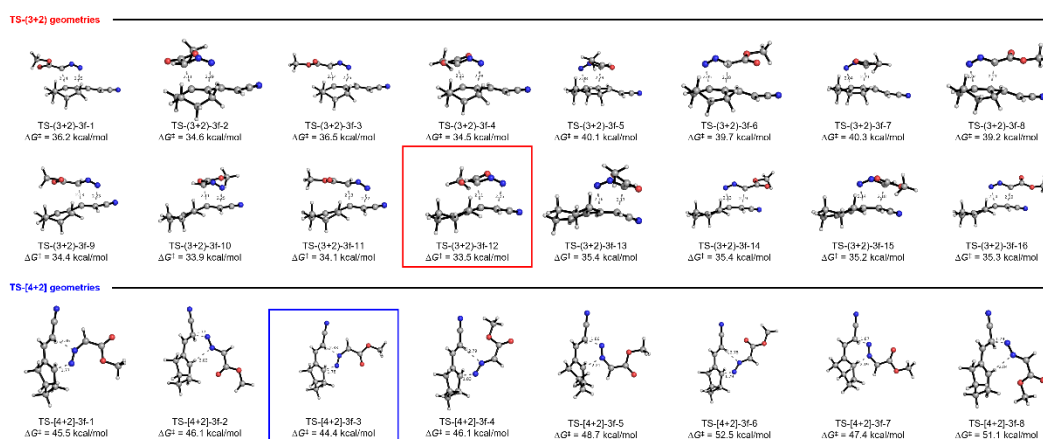

**Figure S24.** Free energies ( $\Delta G_{298}^\ddagger$ ) (in kcal/mol) of possible transition states of intermolecular (3+2) and [4+2] cycloadditions reactions between **3f** and **MDA** were calculated at the M06-2X/6-311+G(d,p)/SMD(CH<sub>2</sub>Cl<sub>2</sub>)/M06-2X/6-31G(d,p) level.

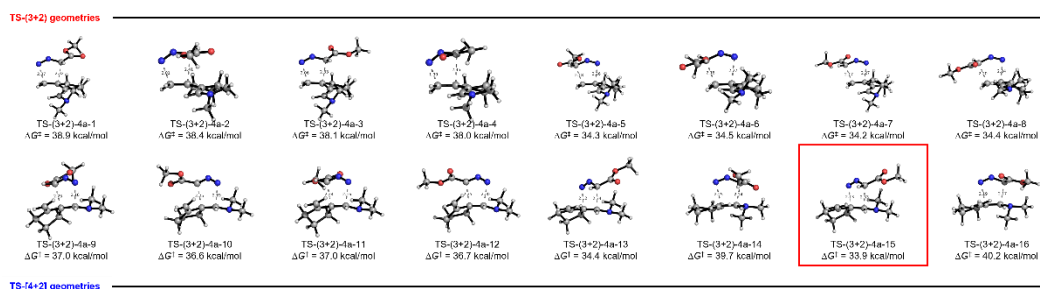

**Figure S25.** Free energies ( $\Delta G_{298}$ ) (in kcal/mol) of possible transition states of intermolecular (3+2) and [4+2] cycloadditions reactions between **4a** and **MDA** were calculated at the M06-2X/6-311+G(d,p)/SMD(CH<sub>2</sub>Cl<sub>2</sub>)/M06-2X/6-31G(d,p) level.

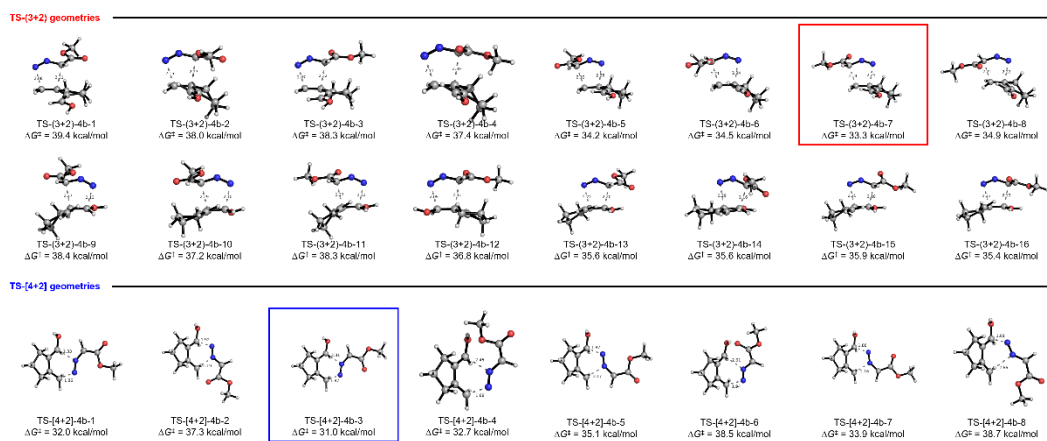

**Figure S26.** Free energies ( $\Delta G_{298}$ ) (in kcal/mol) of possible transition states of intermolecular (3+2) and [4+2] cycloadditions reactions between **4b** and **MDA** were calculated at the M06-2X/6-311+G(d,p)/SMD(CH<sub>2</sub>Cl<sub>2</sub>)/M06-2X/6-31G(d,p) level.

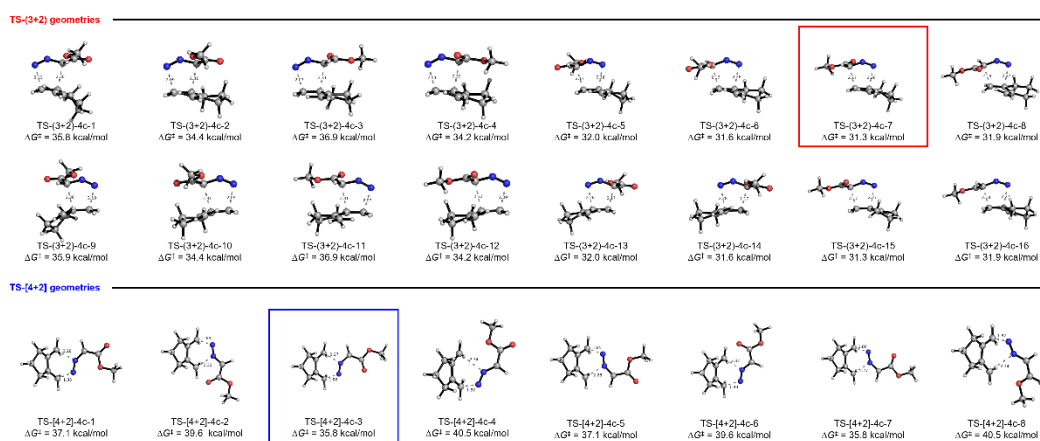

**Figure S27.** Free energies ( $\Delta G_{298}$ ) (in kcal/mol) of possible transition states of intermolecular (3+2) and [4+2] cycloadditions reactions between **4c** and **MDA** were calculated at the M06-2X/6-311+G(d,p)/SMD(CH<sub>2</sub>Cl<sub>2</sub>)/M06-2X/6-31G(d,p) level.

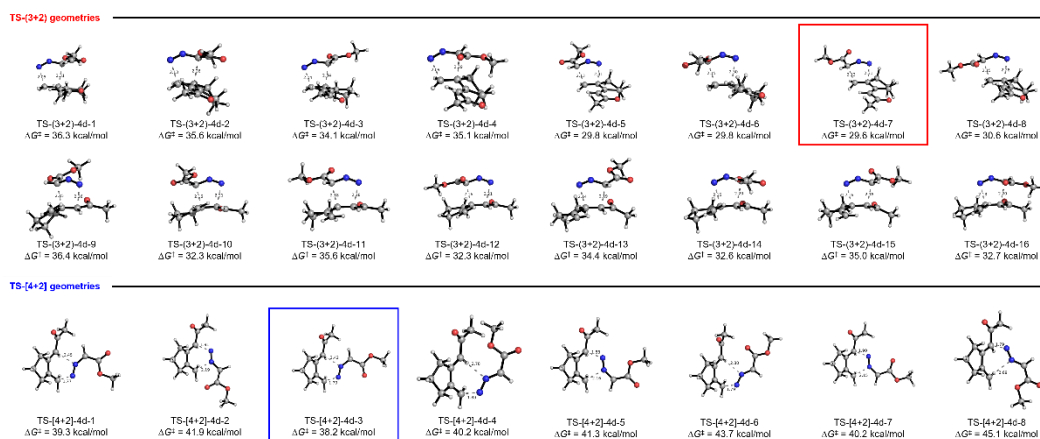

**Figure S28.** Free energies ( $\Delta G_{298}$ ) (in kcal/mol) of possible transition states of intermolecular (3+2) and [4+2] cycloadditions reactions between **4d** and **MDA** were calculated at the M06-2X/6-311+G(d,p)/SMD(CH<sub>2</sub>Cl<sub>2</sub>)/M06-2X/6-31G(d,p) level.

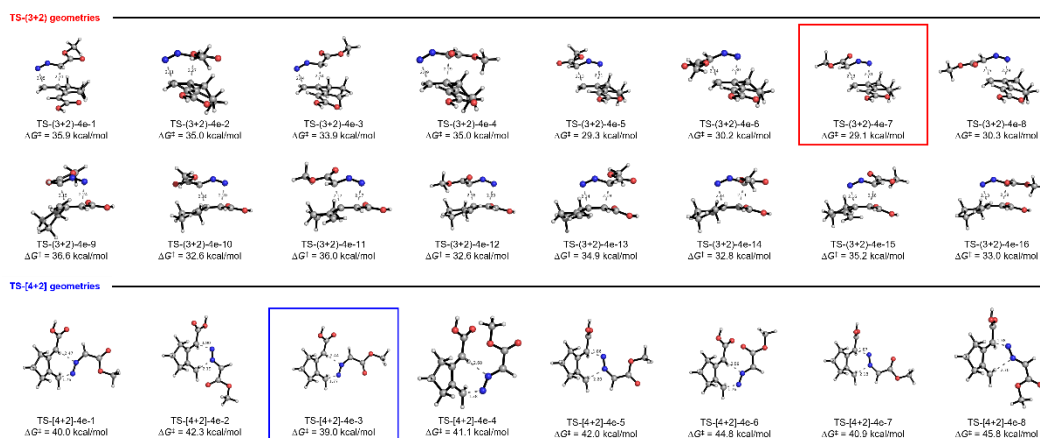

**Figure S29.** Free energies ( $\Delta G_{298}$ ) (in kcal/mol) of possible transition states of intermolecular (3+2) and [4+2] cycloadditions reactions between **4e** and **MDA** were calculated at the M06-2X/6-311+G(d,p)/SMD(CH<sub>2</sub>Cl<sub>2</sub>)/M06-2X/6-31G(d,p) level.

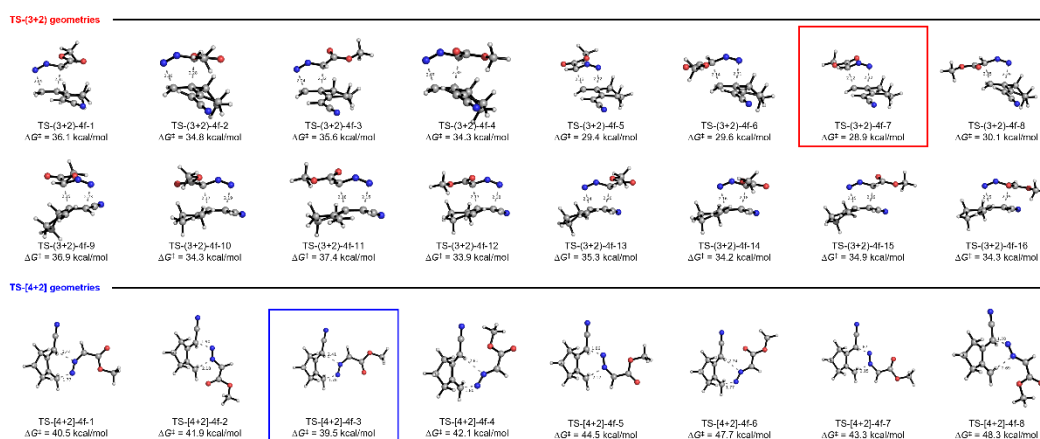

**Figure S30.** Free energies ( $\Delta G_{298}$ ) (in kcal/mol) of possible transition states of intermolecular (3+2) and [4+2] cycloadditions reactions between **4f** and **MDA** were calculated at the M06-2X/6-311+G(d,p)/SMD(CH<sub>2</sub>Cl<sub>2</sub>)/M06-2X/6-31G(d,p) level.

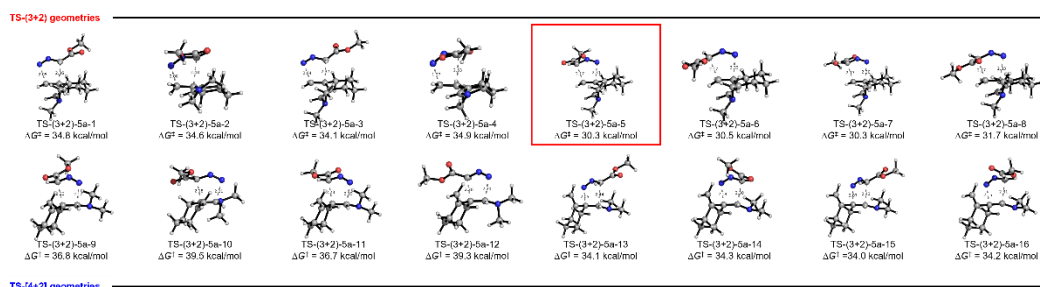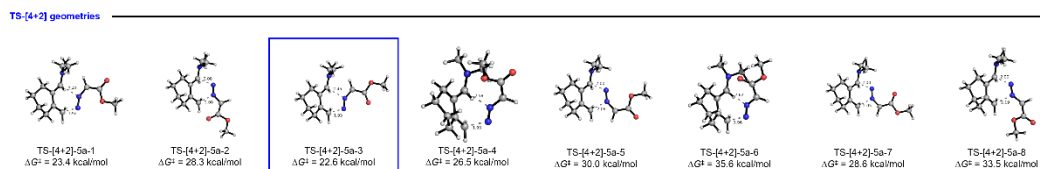

**Figure S31.** Free energies ( $\Delta G_{298}^\ddagger$ ) (in kcal/mol) of possible transition states of intermolecular (3+2) and [4+2] cycloadditions reactions between **5a** and **MDA** were calculated at the M06-2X/6-311+G(d,p)/SMD(CH<sub>2</sub>Cl<sub>2</sub>)/M06-2X/6-31G(d,p) level.

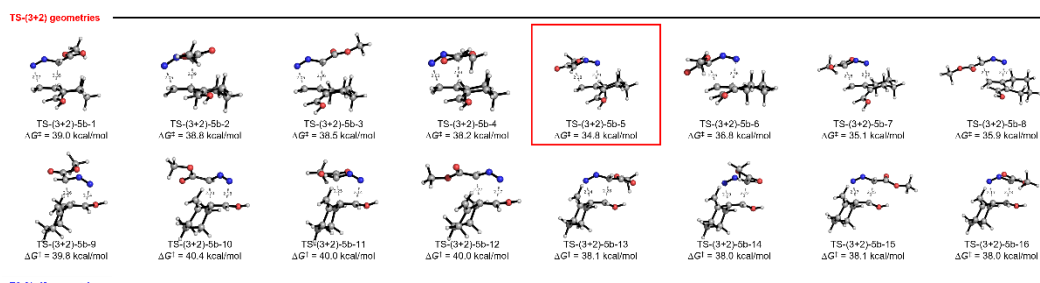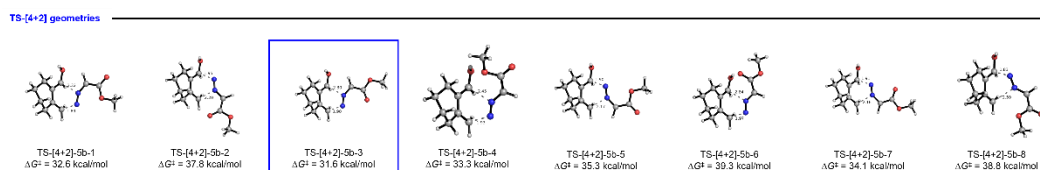

**Figure S32.** Free energies ( $\Delta G_{298}^\ddagger$ ) (in kcal/mol) of possible transition states of intermolecular (3+2) and [4+2] cycloadditions reactions between **5b** and **MDA** were calculated at the M06-2X/6-311+G(d,p)/SMD(CH<sub>2</sub>Cl<sub>2</sub>)/M06-2X/6-31G(d,p) level.

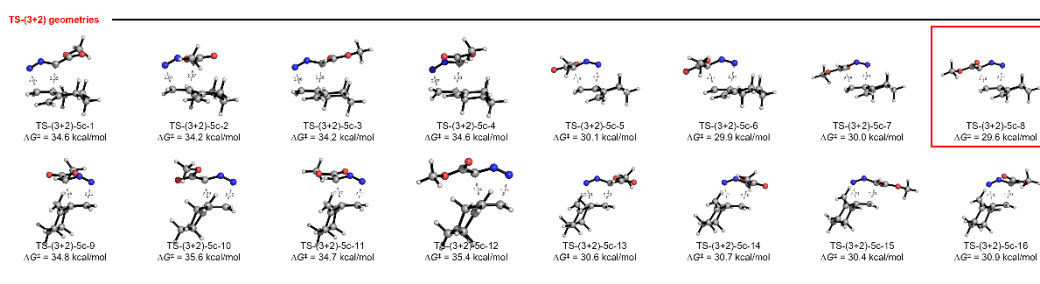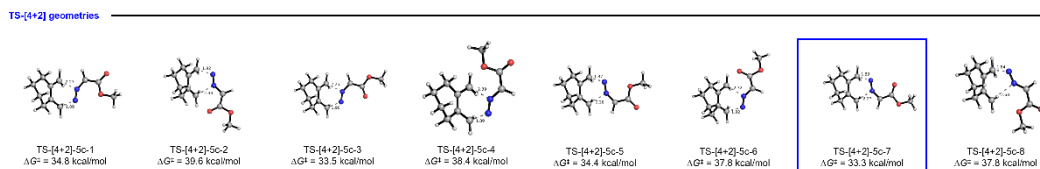

**Figure S33.** Free energies ( $\Delta G_{298}^\ddagger$ ) (in kcal/mol) of possible transition states of intermolecular (3+2) and [4+2] cycloadditions reactions between **5c** and **MDA** were calculated at the M06-2X/6-311+G(d,p)/SMD(CH<sub>2</sub>Cl<sub>2</sub>)/M06-2X/6-31G(d,p) level.

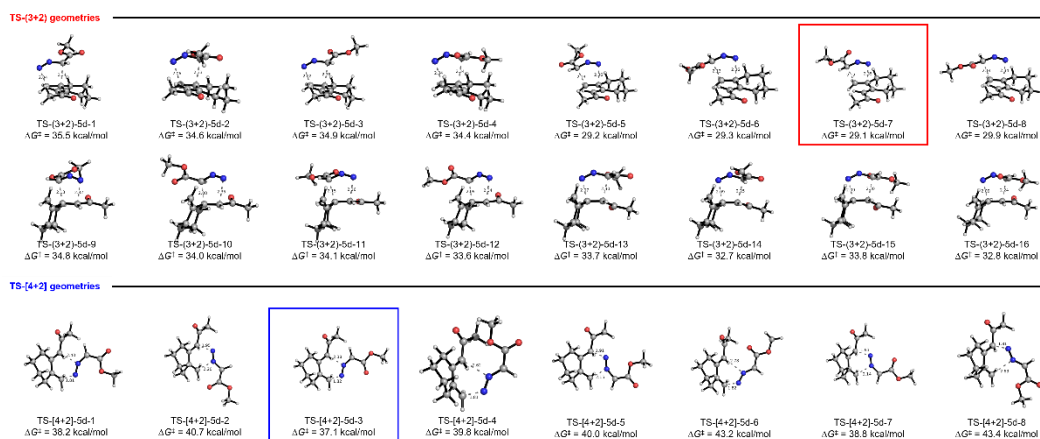

**Figure S34.** Free energies ( $\Delta G_{298}^\ddagger$ ) (in kcal/mol) of possible transition states of intermolecular (3+2) and [4+2] cycloadditions reactions between **5d** and **MDA** were calculated at the M06-2X/6-311+G(d,p)/SMD(CH<sub>2</sub>Cl<sub>2</sub>)/M06-2X/6-31G(d,p) level.

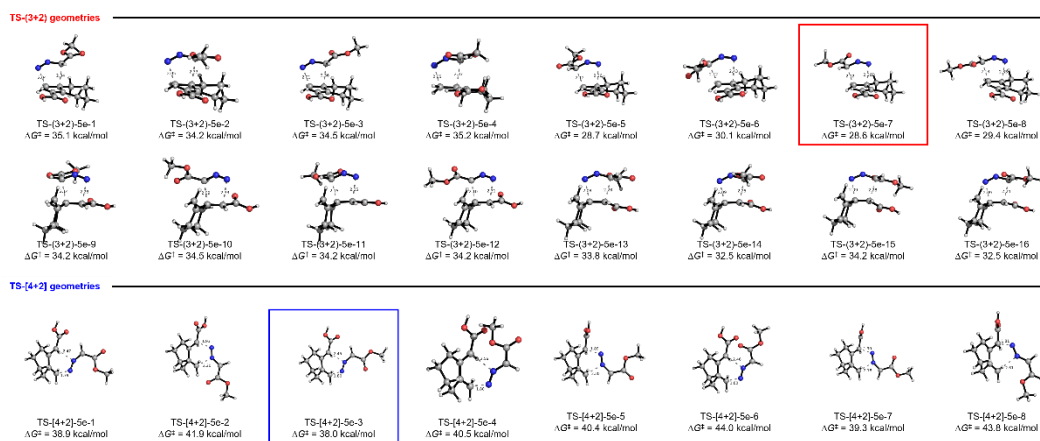

**Figure S35.** Free energies ( $\Delta G_{298}^\ddagger$ ) (in kcal/mol) of possible transition states of intermolecular (3+2) and [4+2] cycloadditions reactions between **5e** and **MDA** were calculated at the M06-2X/6-311+G(d,p)/SMD(CH<sub>2</sub>Cl<sub>2</sub>)/M06-2X/6-31G(d,p) level.

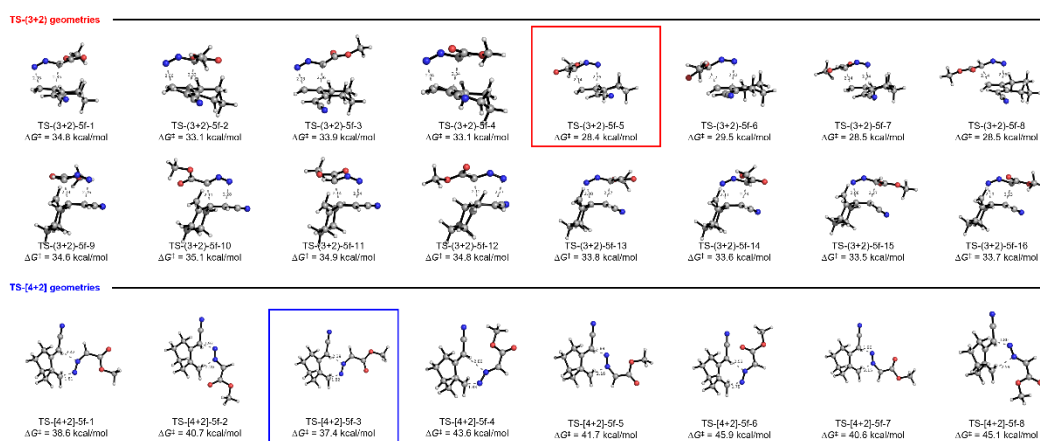

**Figure S36.** Free energies ( $\Delta G_{298}^\ddagger$ ) (in kcal/mol) of possible transition states of intermolecular (3+2) and [4+2] cycloadditions reactions between **5f** and **MDA** were calculated at the M06-2X/6-311+G(d,p)/SMD(CH<sub>2</sub>Cl<sub>2</sub>)/M06-2X/6-31G(d,p) level.

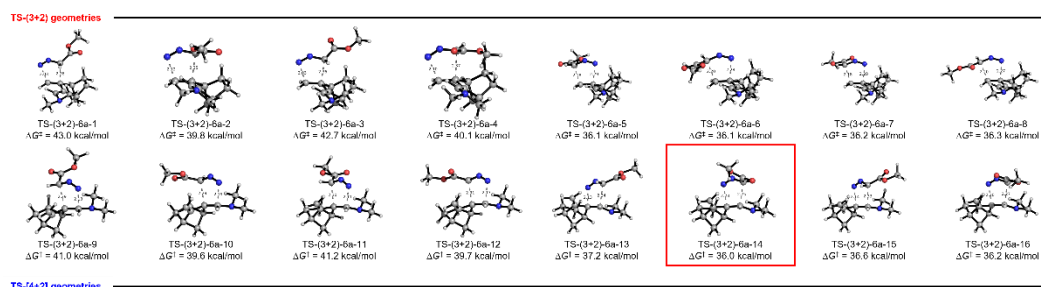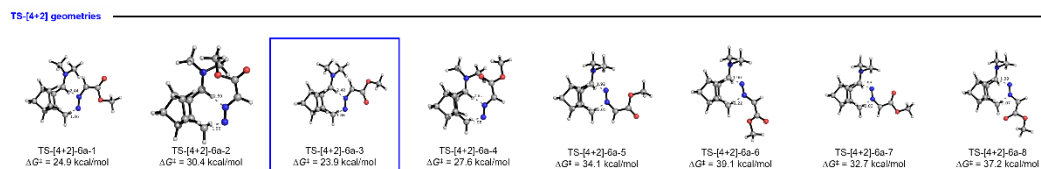

**Figure S37.** Free energies ( $\Delta G_{298}$ ) (in kcal/mol) of possible transition states of intermolecular (3+2) and [4+2] cycloadditions reactions between **6a** and **MDA** were calculated at the M06-2X/6-311+G(d,p)/SMD(CH<sub>2</sub>Cl<sub>2</sub>)/M06-2X/6-31G(d,p) level.

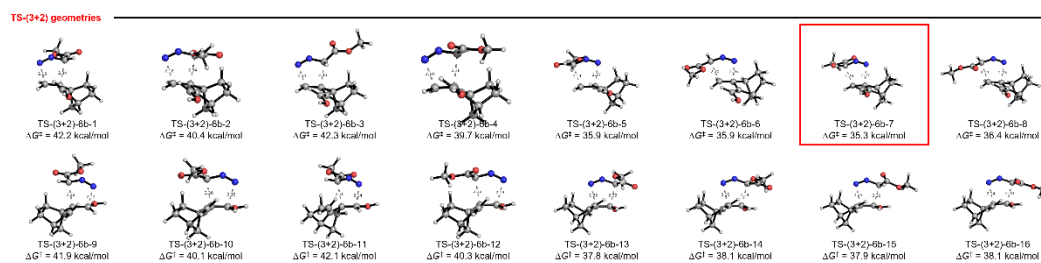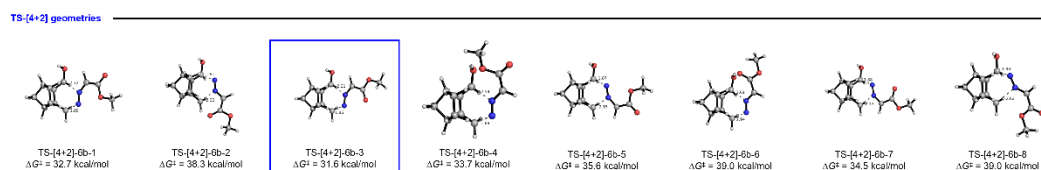

**Figure S38.** Free energies ( $\Delta G_{298}$ ) (in kcal/mol) of possible transition states of intermolecular (3+2) and [4+2] cycloadditions reactions between **6b** and **MDA** were calculated at the M06-2X/6-311+G(d,p)/SMD(CH<sub>2</sub>Cl<sub>2</sub>)/M06-2X/6-31G(d,p) level.

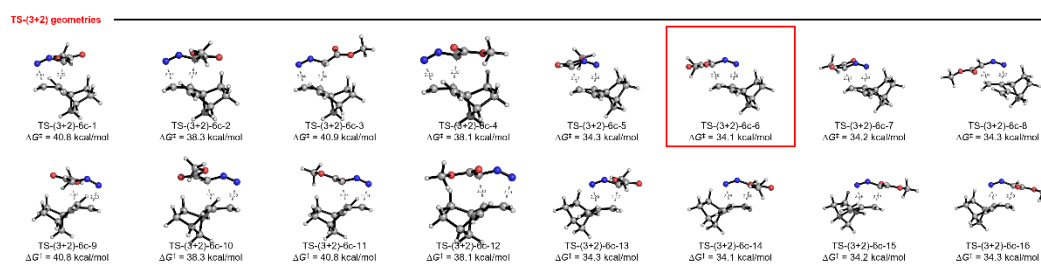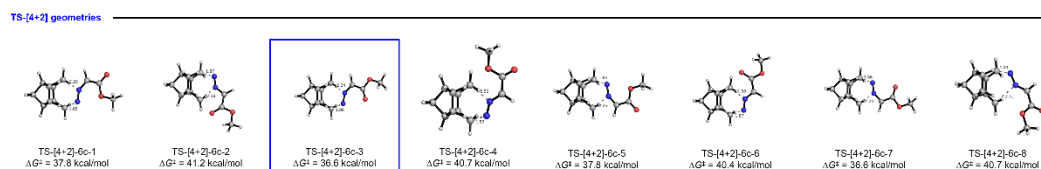

**Figure S39.** Free energies ( $\Delta G_{298}$ ) (in kcal/mol) of possible transition states of intermolecular (3+2) and [4+2] cycloadditions reactions between **6c** and **MDA** were calculated at the M06-2X/6-311+G(d,p)/SMD(CH<sub>2</sub>Cl<sub>2</sub>)/M06-2X/6-31G(d,p) level.



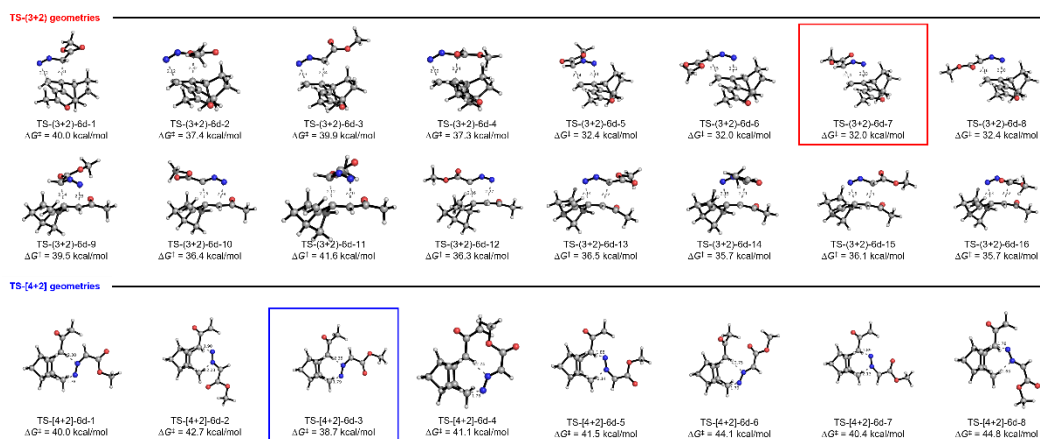

**Figure S40.** Free energies ( $\Delta G_{298}$ ) (in kcal/mol) of possible transition states of intermolecular (3+2) and [4+2] cycloadditions reactions between **6d** and **MDA** were calculated at the M06-2X/6-311+G(d,p)/SMD(CH<sub>2</sub>Cl<sub>2</sub>)/M06-2X/6-31G(d,p) level.

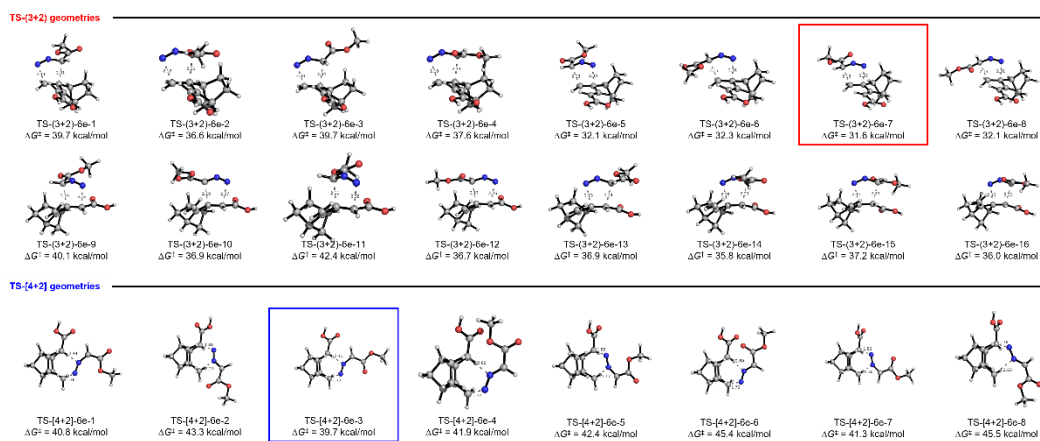

**Figure S41.** Free energies ( $\Delta G_{298}$ ) (in kcal/mol) of possible transition states of intermolecular (3+2) and [4+2] cycloadditions reactions between **6e** and **MDA** were calculated at the M06-2X/6-311+G(d,p)/SMD(CH<sub>2</sub>Cl<sub>2</sub>)/M06-2X/6-31G(d,p) level.

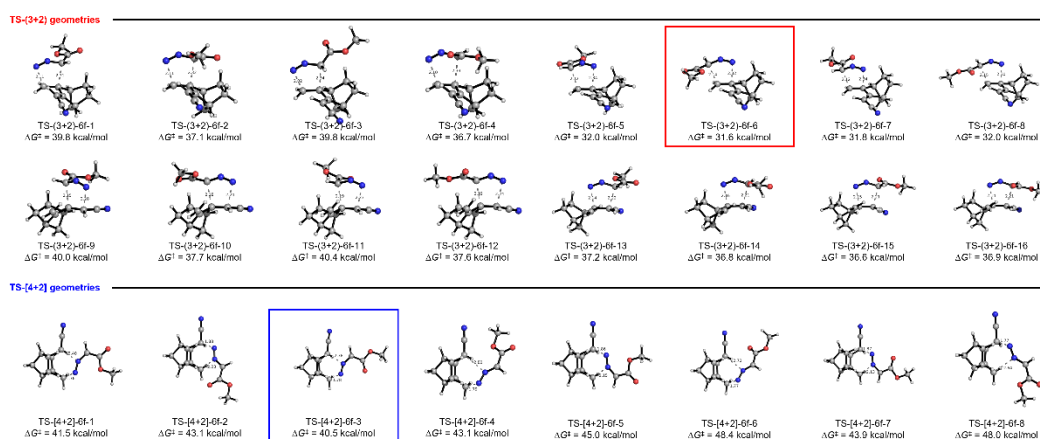

**Figure S42.** Free energies ( $\Delta G_{298}$ ) (in kcal/mol) of possible transition states of intermolecular (3+2) and [4+2] cycloadditions reactions between **6f** and **MDA** were calculated at the M06-2X/6-311+G(d,p)/SMD(CH<sub>2</sub>Cl<sub>2</sub>)/M06-2X/6-31G(d,p) level.

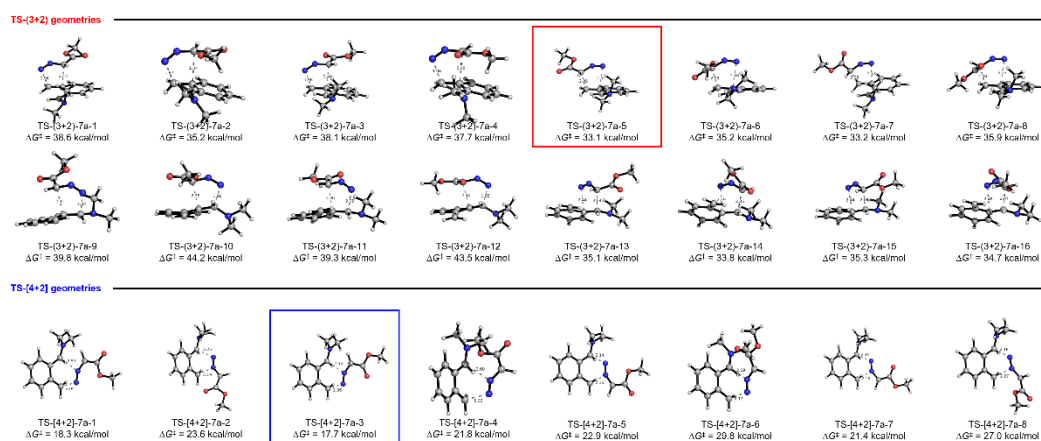

**Figure S43.** Free energies ( $\Delta G_{298}$ ) (in kcal/mol) of possible transition states of intermolecular (3+2) and [4+2] cycloadditions reactions between **7a** and **MDA** were calculated at the M06-2X/6-311+G(d,p)/SMD(CH<sub>2</sub>Cl<sub>2</sub>)/M06-2X/6-31G(d,p) level.

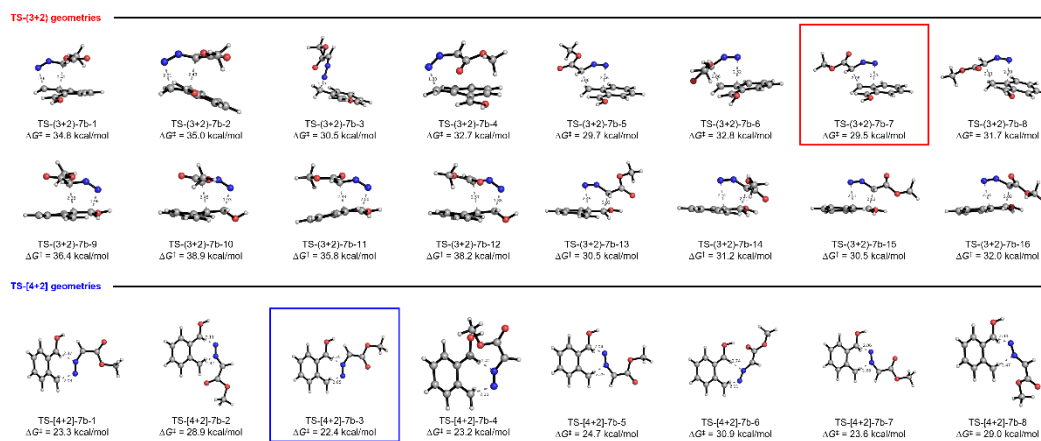

**Figure S44.** Free energies ( $\Delta G_{298}$ ) (in kcal/mol) of possible transition states of intermolecular (3+2) and [4+2] cycloadditions reactions between **7b** and **MDA** were calculated at the M06-2X/6-311+G(d,p)/SMD(CH<sub>2</sub>Cl<sub>2</sub>)/M06-2X/6-31G(d,p) level.

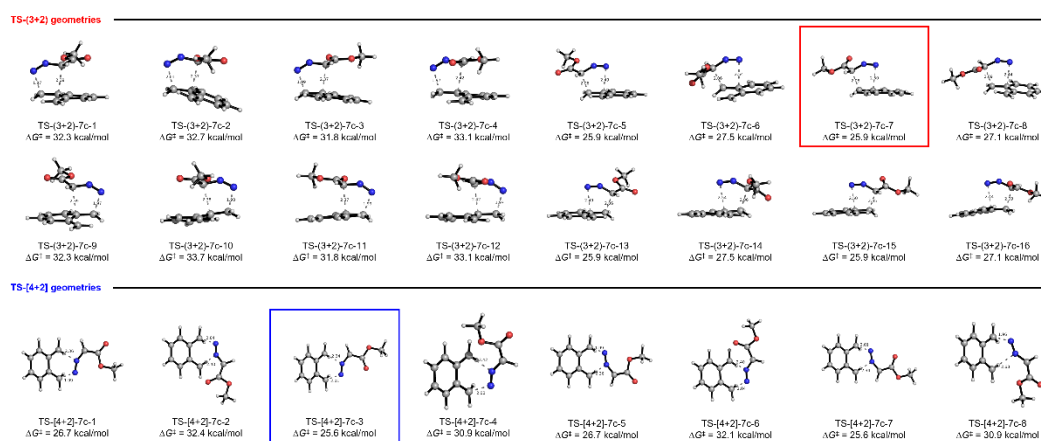

**Figure S45.** Free energies ( $\Delta G_{298}$ ) (in kcal/mol) of possible transition states of intermolecular (3+2) and [4+2] cycloadditions reactions between **7c** and **MDA** were calculated at the M06-2X/6-311+G(d,p)/SMD(CH<sub>2</sub>Cl<sub>2</sub>)/M06-2X/6-31G(d,p) level.

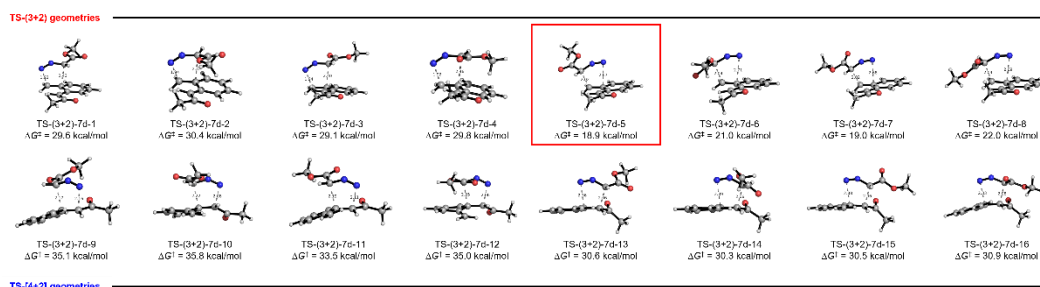

**Figure S46.** Free energies ( $\Delta G_{298}$ ) (in kcal/mol) of possible transition states of intermolecular (3+2) and [4+2] cycloadditions reactions between **7d** and **MDA** were calculated at the M06-2X/6-311+G(d,p)/SMD(CH<sub>2</sub>Cl<sub>2</sub>)/M06-2X/6-31G(d,p) level.

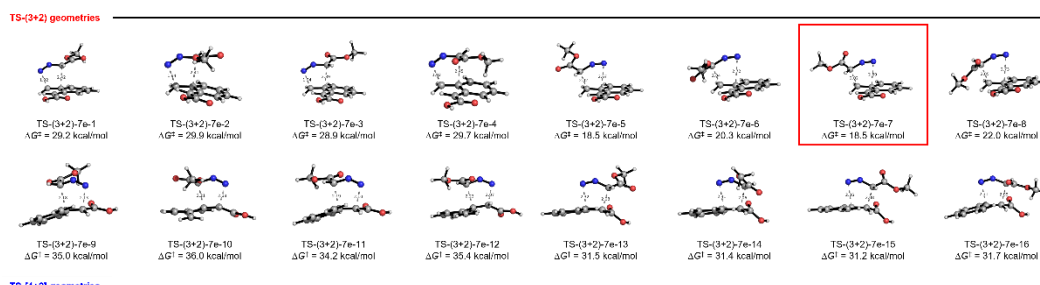

**Figure S47.** Free energies ( $\Delta G_{298}$ ) (in kcal/mol) of possible transition states of intermolecular (3+2) and [4+2] cycloadditions reactions between **7e** and **MDA** were calculated at the M06-2X/6-311+G(d,p)/SMD(CH<sub>2</sub>Cl<sub>2</sub>)/M06-2X/6-31G(d,p) level.

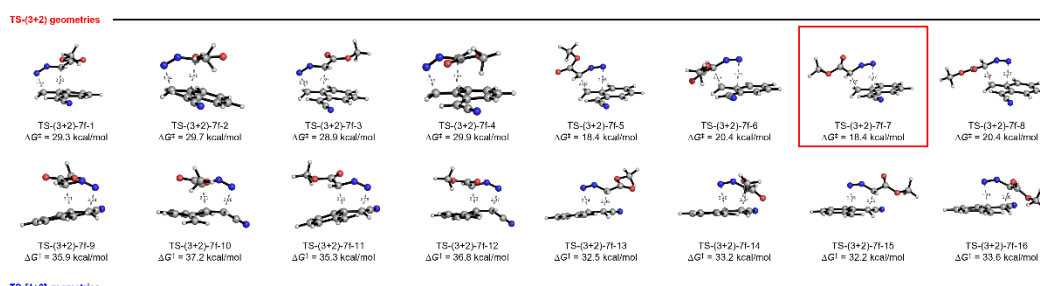

**Figure S48.** Free energies ( $\Delta G_{298}$ ) (in kcal/mol) of possible transition states of intermolecular (3+2) and [4+2] cycloadditions reactions between **7f** and **MDA** were calculated at the M06-2X/6-311+G(d,p)/SMD(CH<sub>2</sub>Cl<sub>2</sub>)/M06-2X/6-31G(d,p) level.

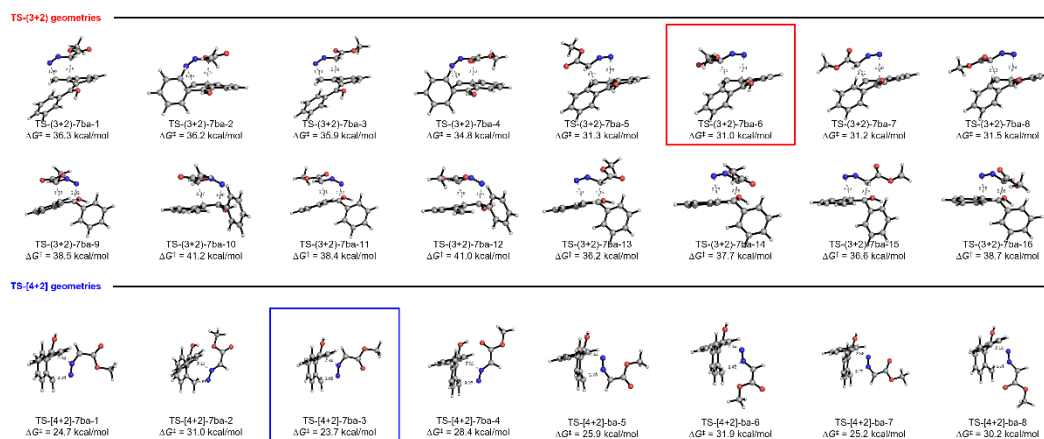

**Figure S49.** Free energies ( $\Delta G_{298}^\ddagger$ ) (in kcal/mol) of possible transition states of intermolecular (3+2) and [4+2] cycloadditions reactions between **7ba** and **MDA** were calculated at the M06-2X/6-311+G(d,p)/SMD(CH<sub>2</sub>Cl<sub>2</sub>)/M06-2X/6-31G(d,p) level.

## 14. Table of Energies

Zero-point correction (*ZPE*), thermal correction to enthalpy (*TCH*), thermal correction to Gibbs free energy (*TCG*), energies (*E*), enthalpies (*H*), and Gibbs free energies (*G*) (in Hartree) of the structures calculated at the M06-2X/6-311+G(d,p)-SMD(CH<sub>2</sub>Cl<sub>2</sub>)/M06-2X/6-31G(d,p) level of theory.

**Table S9.** Energies for all calculated species

| Structures | ZPE      | tcH      | tcG      | E(gas phase) | E(solvent)  | Imaginary Frequency |
|------------|----------|----------|----------|--------------|-------------|---------------------|
| <b>1a</b>  | 0.160857 | 0.170252 | 0.128334 | -289.828458  | -289.913183 |                     |
| <b>1b</b>  | 0.091529 | 0.098060 | 0.063282 | -231.109156  | -231.186979 |                     |
| <b>1c</b>  | 0.086097 | 0.091687 | 0.059630 | -155.911244  | -155.957111 |                     |
| <b>1d</b>  | 0.124465 | 0.133348 | 0.091970 | -308.500463  | -308.595487 |                     |
| <b>1e</b>  | 0.102452 | 0.110516 | 0.070888 | -344.426434  | -344.539366 |                     |
| <b>1f</b>  | 0.085469 | 0.092601 | 0.055852 | -248.127852  | -248.204784 |                     |
| <b>2a</b>  | 0.226306 | 0.238014 | 0.189888 | -406.520784  | -406.631689 |                     |
| <b>2b</b>  | 0.157089 | 0.165836 | 0.124815 | -347.801972  | -347.906463 |                     |
| <b>2c</b>  | 0.151767 | 0.159469 | 0.121176 | -272.604476  | -272.677381 |                     |
| <b>2d</b>  | 0.189904 | 0.201085 | 0.153522 | -425.194434  | -425.316800 |                     |
| <b>2e</b>  | 0.167910 | 0.178276 | 0.132440 | -461.120562  | -461.260956 |                     |
| <b>2f</b>  | 0.150990 | 0.160369 | 0.117381 | -364.822266  | -364.926522 |                     |
| <b>3a</b>  | 0.256067 | 0.268644 | 0.218617 | -445.822478  | -445.942385 |                     |
| <b>3b</b>  | 0.186833 | 0.196461 | 0.153483 | -387.104010  | -387.217722 |                     |
| <b>3c</b>  | 0.181572 | 0.190111 | 0.149911 | -311.907384  | -311.989593 |                     |
| <b>3d</b>  | 0.219621 | 0.231696 | 0.182145 | -464.497710  | -464.629401 |                     |
| <b>3e</b>  | 0.197665 | 0.208911 | 0.161146 | -500.423939  | -500.573756 |                     |
| <b>3f</b>  | 0.180770 | 0.191015 | 0.146118 | -404.125649  | -404.239422 |                     |
| <b>4a</b>  | 0.225466 | 0.237241 | 0.189159 | -406.511605  | -406.620926 |                     |
| <b>4b</b>  | 0.156592 | 0.165352 | 0.124188 | -347.798435  | -347.902156 |                     |
| <b>4c</b>  | 0.151150 | 0.158779 | 0.120386 | -272.601084  | -272.673369 |                     |
| <b>4d</b>  | 0.189328 | 0.200413 | 0.153372 | -425.192196  | -425.312431 |                     |
| <b>4e</b>  | 0.167347 | 0.177618 | 0.132293 | -461.118295  | -461.256669 |                     |
| <b>4f</b>  | 0.150389 | 0.159729 | 0.116747 | -364.820977  | -364.924165 |                     |
| <b>5a</b>  | 0.255034 | 0.267715 | 0.217440 | -445.804508  | -445.922012 |                     |
| <b>5b</b>  | 0.186681 | 0.196217 | 0.153617 | -387.099951  | -387.212398 |                     |
| <b>5c</b>  | 0.180731 | 0.189440 | 0.148453 | -311.896498  | -311.977719 |                     |
| <b>5d</b>  | 0.219004 | 0.231097 | 0.181669 | -464.487218  | -464.616146 |                     |
| <b>5e</b>  | 0.196972 | 0.208268 | 0.160538 | -500.413432  | -500.560568 |                     |
| <b>5f</b>  | 0.179999 | 0.190379 | 0.144946 | -404.117131  | -404.229029 |                     |
| <b>6a</b>  | 0.261959 | 0.274622 | 0.224435 | -483.894394  | -484.021105 |                     |
| <b>6b</b>  | 0.193137 | 0.202717 | 0.159673 | -425.181369  | -425.302599 |                     |
| <b>6c</b>  | 0.187833 | 0.196274 | 0.156087 | -349.985420  | -350.075179 |                     |
| <b>6d</b>  | 0.226043 | 0.238053 | 0.188651 | -502.575319  | -502.713098 |                     |
| <b>6e</b>  | 0.204027 | 0.215226 | 0.167552 | -538.501645  | -538.657516 |                     |

|                            |          |          |          |             |             |         |
|----------------------------|----------|----------|----------|-------------|-------------|---------|
| <b>6f</b>                  | 0.187139 | 0.197312 | 0.152484 | -442.204987 | -442.325509 |         |
| <b>7a</b>                  | 0.208561 | 0.220244 | 0.172430 | -443.380490 | -443.504082 |         |
| <b>7b</b>                  | 0.138927 | 0.147807 | 0.106577 | -384.662894 | -384.779703 |         |
| <b>7c</b>                  | 0.133789 | 0.141453 | 0.103660 | -309.466484 | -309.550385 |         |
| <b>7d</b>                  | 0.172211 | 0.183353 | 0.136064 | -462.054681 | -462.186004 |         |
| <b>7e</b>                  | 0.150092 | 0.160438 | 0.114824 | -497.980869 | -498.130186 |         |
| <b>7f</b>                  | 0.133089 | 0.142439 | 0.099550 | -401.685562 | -401.799336 |         |
| <b>7ba</b>                 | 0.220933 | 0.234158 | 0.182109 | -615.629765 | -615.801443 |         |
| <b>MDA</b>                 | 0.078143 | 0.086235 | 0.046603 | -376.474472 | -376.590023 |         |
| <b>TS-(3+2)-1a</b>         | 0.240677 | 0.257437 | 0.195866 | -666.272431 | -666.469809 | 550.11i |
| <b>TS-(3+2)-1a-product</b> | 0.245982 | 0.261854 | 0.201883 | -666.352119 | -666.550480 |         |
| <b>TS-(3+2)-1b</b>         | 0.171311 | 0.185193 | 0.130484 | -607.553296 | -607.744620 | 546.55i |
| <b>TS-(3+2)-1b-product</b> | 0.176729 | 0.189624 | 0.136729 | -607.632848 | -607.825029 |         |
| <b>TS-(3+2)-1c</b>         | 0.166088 | 0.178872 | 0.127109 | -532.357632 | -532.517682 | 535.98i |
| <b>TS-(3+2)-1c-product</b> | 0.171398 | 0.183215 | 0.133370 | -532.436102 | -532.595462 |         |
| <b>TS-(3+2)-1d</b>         | 0.204396 | 0.220652 | 0.159679 | -684.950216 | -685.159912 | 528.49i |
| <b>TS-(3+2)-1d-product</b> | 0.209429 | 0.224789 | 0.165392 | -685.023277 | -685.231854 |         |
| <b>TS-(3+2)-1e</b>         | 0.182378 | 0.197810 | 0.138606 | -720.876235 | -721.104245 | 526.97i |
| <b>TS-(3+2)-1e-product</b> | 0.187478 | 0.202010 | 0.144441 | -720.949143 | -721.175502 |         |
| <b>TS-(3+2)-1f</b>         | 0.165451 | 0.179909 | 0.123455 | -624.577847 | -624.770026 | 526.59i |
| <b>TS-(3+2)-1f-product</b> | 0.170594 | 0.184109 | 0.129613 | -624.650129 | -624.840346 |         |
| <b>TS-(3+2)-2a</b>         | 0.305743 | 0.324815 | 0.258342 | -782.965552 | -783.188643 | 550.48i |
| <b>TS-(3+2)-2a-product</b> | 0.311062 | 0.329111 | 0.265184 | -783.045243 | -783.269502 |         |
| <b>TS-(3+2)-2b</b>         | 0.236482 | 0.252627 | 0.193290 | -724.246653 | -724.463899 | 547.58i |
| <b>TS-(3+2)-2b-product</b> | 0.241949 | 0.256958 | 0.200352 | -724.326495 | -724.544512 |         |
| <b>TS-(3+2)-2c</b>         | 0.231576 | 0.246650 | 0.188922 | -649.050979 | -649.237515 | 536.56i |
| <b>TS-(3+2)-2c-product</b> | 0.236963 | 0.251067 | 0.195531 | -649.129756 | -649.316635 |         |
| <b>TS-(3+2)-2d</b>         | 0.269877 | 0.288114 | 0.224537 | -801.652430 | -801.882476 | 519.10i |
| <b>TS-(3+2)-2d-product</b> | 0.274417 | 0.291909 | 0.229271 | -801.713328 | -801.945500 |         |
| <b>TS-(3+2)-2e</b>         | 0.247391 | 0.265154 | 0.201007 | -837.568667 | -837.823754 | 537.86i |
| <b>TS-(3+2)-2e-product</b> | 0.252529 | 0.269276 | 0.207329 | -837.643193 | -837.895304 |         |
| <b>TS-(3+2)-2f</b>         | 0.230615 | 0.247340 | 0.186238 | -741.271759 | -741.489767 | 538.45i |
| <b>TS-(3+2)-2f-product</b> | 0.235741 | 0.251434 | 0.192848 | -741.343810 | -741.560389 |         |
| <b>TS-(3+2)-3a</b>         | 0.335124 | 0.355218 | 0.287095 | -822.265075 | -822.495437 | 489.64i |
| <b>TS-(3+2)-3a-product</b> | 0.340858 | 0.359565 | 0.295151 | -822.337787 | -822.570117 |         |
| <b>TS-(3+2)-3b</b>         | 0.266182 | 0.283130 | 0.222292 | -763.546059 | -763.771725 | 557.31i |
| <b>TS-(3+2)-3b-product</b> | 0.271433 | 0.287484 | 0.227866 | -763.621909 | -763.848514 |         |
| <b>TS-(3+2)-3c</b>         | 0.261156 | 0.277216 | 0.216970 | -688.352706 | -688.548635 | 539.11i |
| <b>TS-(3+2)-3c-product</b> | 0.266605 | 0.281657 | 0.223725 | -688.433266 | -688.629403 |         |
| <b>TS-(3+2)-3d</b>         | 0.299570 | 0.318777 | 0.253242 | -840.954455 | -841.193202 | 522.97i |
| <b>TS-(3+2)-3d-product</b> | 0.304149 | 0.322558 | 0.258098 | -841.016062 | -841.257345 |         |
| <b>TS-(3+2)-3e</b>         | 0.277467 | 0.295873 | 0.231951 | -876.878458 | -877.136132 | 522.77i |
| <b>TS-(3+2)-3e-product</b> | 0.282140 | 0.299785 | 0.236719 | -876.938684 | -877.198351 |         |
| <b>TS-(3+2)-3f</b>         | 0.260186 | 0.277971 | 0.213812 | -780.569343 | -780.797159 | 529.32i |

|                            |          |          |          |             |             |         |
|----------------------------|----------|----------|----------|-------------|-------------|---------|
| <b>TS-(3+2)-3f-product</b> | 0.265026 | 0.281898 | 0.219614 | -780.635430 | -780.860308 |         |
| <b>TS-(3+2)-4a</b>         | 0.305514 | 0.324317 | 0.260283 | -782.961889 | -783.181493 | 471.81i |
| <b>TS-(3+2)-4a-product</b> | 0.310858 | 0.328449 | 0.267567 | -783.029962 | -783.250030 |         |
| <b>TS-(3+2)-4b</b>         | 0.235658 | 0.252322 | 0.190302 | -724.239821 | -724.458675 | 551.08i |
| <b>TS-(3+2)-4b-product</b> | 0.241270 | 0.256649 | 0.198699 | -724.326479 | -724.543347 |         |
| <b>TS-(3+2)-4c</b>         | 0.230961 | 0.246052 | 0.188161 | -649.048517 | -649.234674 | 546.32i |
| <b>TS-(3+2)-4c-product</b> | 0.236286 | 0.250271 | 0.195662 | -649.131622 | -649.316044 |         |
| <b>TS-(3+2)-4d</b>         | 0.269166 | 0.287814 | 0.221399 | -801.641397 | -801.876629 | 542.15i |
| <b>TS-(3+2)-4d-product</b> | 0.274406 | 0.291936 | 0.228623 | -801.722182 | -801.954401 |         |
| <b>TS-(3+2)-4e</b>         | 0.247187 | 0.265008 | 0.200380 | -837.568208 | -837.821747 | 541.06i |
| <b>TS-(3+2)-4e-product</b> | 0.252366 | 0.269098 | 0.207463 | -837.647986 | -837.898428 |         |
| <b>TS-(3+2)-4f</b>         | 0.230316 | 0.247149 | 0.184935 | -741.271403 | -741.489731 | 544.16i |
| <b>TS-(3+2)-4f-product</b> | 0.235411 | 0.251188 | 0.191939 | -741.349745 | -741.564912 |         |
| <b>TS-(3+2)-5a</b>         | 0.335223 | 0.355230 | 0.287303 | -822.257991 | -822.487029 | 542.34i |
| <b>TS-(3+2)-5a-product</b> | 0.340270 | 0.359297 | 0.293480 | -822.339753 | -822.570686 |         |
| <b>TS-(3+2)-5b</b>         | 0.266277 | 0.283381 | 0.222160 | -763.543417 | -763.768847 | 541.32i |
| <b>TS-(3+2)-5b-product</b> | 0.271353 | 0.287676 | 0.227908 | -763.624410 | -763.851234 |         |
| <b>TS-(3+2)-5c</b>         | 0.260995 | 0.276931 | 0.217613 | -688.348071 | -688.543177 | 531.77i |
| <b>TS-(3+2)-5c-product</b> | 0.266449 | 0.281087 | 0.225964 | -688.431263 | -688.626871 |         |
| <b>TS-(3+2)-5d</b>         | 0.298980 | 0.318534 | 0.250429 | -840.938741 | -841.181945 | 539.89i |
| <b>TS-(3+2)-5d-product</b> | 0.304327 | 0.322849 | 0.256773 | -841.017538 | -841.259492 |         |
| <b>TS-(3+2)-5e</b>         | 0.276938 | 0.295688 | 0.229360 | -876.865856 | -877.127259 | 537.98i |
| <b>TS-(3+2)-5e-product</b> | 0.282343 | 0.300035 | 0.235986 | -876.944596 | -877.204372 |         |
| <b>TS-(3+2)-5f</b>         | 0.260366 | 0.278032 | 0.214629 | -780.571319 | -780.796810 | 531.33i |
| <b>TS-(3+2)-5f-product</b> | 0.265750 | 0.282348 | 0.221843 | -780.648514 | -780.872932 |         |
| <b>TS-(3+2)-6a</b>         | 0.341723 | 0.361518 | 0.295133 | -860.340236 | -860.577910 | 493.39i |
| <b>TS-(3+2)-6a-product</b> | 0.347304 | 0.365779 | 0.302620 | -860.419953 | -860.657160 |         |
| <b>TS-(3+2)-6b</b>         | 0.272360 | 0.289731 | 0.226591 | -801.620524 | -801.856657 | 535.86i |
| <b>TS-(3+2)-6b-product</b> | 0.277711 | 0.294038 | 0.234135 | -801.710403 | -801.944233 |         |
| <b>TS-(3+2)-6c</b>         | 0.267735 | 0.283470 | 0.225451 | -726.431142 | -726.633614 | 522.53i |
| <b>TS-(3+2)-6c-product</b> | 0.272897 | 0.287796 | 0.231251 | -726.515328 | -726.717799 |         |
| <b>TS-(3+2)-6d</b>         | 0.305895 | 0.325311 | 0.257203 | -879.022161 | -879.274117 | 535.74i |
| <b>TS-(3+2)-6d-product</b> | 0.311025 | 0.329530 | 0.263901 | -879.106140 | -879.355369 |         |
| <b>TS-(3+2)-6e</b>         | 0.283958 | 0.302514 | 0.236424 | -914.949073 | -915.219389 | 535.46i |
| <b>TS-(3+2)-6e-product</b> | 0.288983 | 0.306679 | 0.242799 | -915.032327 | -915.299721 |         |
| <b>TS-(3+2)-6f</b>         | 0.267024 | 0.284548 | 0.222002 | -818.654072 | -818.888060 | 522.78i |
| <b>TS-(3+2)-6f-product</b> | 0.272123 | 0.288791 | 0.227909 | -818.733742 | -818.966451 |         |
| <b>TS-(3+2)-7a</b>         | 0.287085 | 0.306488 | 0.239189 | -819.826506 | -820.061459 | 572.95i |
| <b>TS-(3+2)-7a-product</b> | 0.292154 | 0.310820 | 0.244679 | -819.893578 | -820.127631 |         |
| <b>TS-(3+2)-7b</b>         | 0.217792 | 0.234655 | 0.172951 | -761.109964 | -761.342488 | 578.55i |
| <b>TS-(3+2)-7b-product</b> | 0.223215 | 0.238843 | 0.179957 | -761.180927 | -761.410140 |         |
| <b>TS-(3+2)-7c</b>         | 0.213276 | 0.228478 | 0.171176 | -685.919859 | -686.120007 | 549.98i |
| <b>TS-(3+2)-7c-product</b> | 0.218285 | 0.232544 | 0.176959 | -685.985502 | -686.182066 |         |
| <b>TS-(3+2)-7d</b>         | 0.251738 | 0.270579 | 0.203938 | -838.515084 | -838.767193 | 480.76i |

|                             |          |          |          |             |             |         |
|-----------------------------|----------|----------|----------|-------------|-------------|---------|
| <b>TS-(3+2)-7d-product</b>  | 0.256406 | 0.274332 | 0.209588 | -838.570933 | -838.815622 |         |
| <b>TS-(3+2)-7e</b>          | 0.229759 | 0.247706 | 0.183429 | -874.442591 | -874.712787 | 469.83i |
| <b>TS-(3+2)-7e-product</b>  | 0.234392 | 0.251454 | 0.188606 | -874.498753 | -874.759974 |         |
| <b>TS-(3+2)-7f</b>          | 0.212638 | 0.229626 | 0.167741 | -778.146458 | -778.381613 | 479.01i |
| <b>TS-(3+2)-7f-product</b>  | 0.217426 | 0.233467 | 0.173342 | -778.202865 | -778.428478 |         |
| <b>TS-(3+2)-7ba</b>         | 0.300550 | 0.321306 | 0.250905 | -992.078596 | -992.364186 | 570.21i |
| <b>TS-(3+2)-7ba-product</b> | 0.305590 | 0.325181 | 0.259038 | -992.151383 | -992.435062 |         |
| <b>TS-[4+2]-1a</b>          | 0.241655 | 0.258101 | 0.198456 | -666.274083 | -666.480229 | 434.97i |
| <b>TS-[4+2]-1a-product</b>  | 0.245743 | 0.261321 | 0.203930 | -666.305891 | -666.507327 |         |
| <b>TS-[4+2]-1b</b>          | 0.172868 | 0.185877 | 0.134321 | -607.548116 | -607.744328 | 466.03i |
| <b>TS-[4+2]-1b-product</b>  | 0.176917 | 0.189339 | 0.138786 | -607.593047 | -607.788384 |         |
| <b>TS-[4+2]-1c</b>          | 0.167474 | 0.179534 | 0.130120 | -532.343453 | -532.507436 | 491.94i |
| <b>TS-[4+2]-1c-product</b>  | 0.172234 | 0.183631 | 0.135501 | -532.399153 | -532.566684 |         |
| <b>TS-[4+2]-1d</b>          | 0.205418 | 0.221011 | 0.162774 | -684.931723 | -685.142294 | 463.46i |
| <b>TS-[4+2]-1d-product</b>  | 0.209531 | 0.224355 | 0.168167 | -684.972858 | -685.186255 |         |
| <b>TS-[4+2]-1e</b>          | 0.183553 | 0.198288 | 0.142021 | -720.858925 | -721.085479 | 461.17i |
| <b>TS-[4+2]-1e-product</b>  | 0.187329 | 0.201499 | 0.146346 | -720.897017 | -721.127594 |         |
| <b>TS-[4+2]-1f</b>          | 0.166453 | 0.180266 | 0.126255 | -624.559132 | -624.750106 | 470.52i |
| <b>TS-[4+2]-1f-product</b>  | 0.170416 | 0.183538 | 0.131116 | -624.596666 | -624.790191 |         |
| <b>TS-[4+2]-2a</b>          | 0.306316 | 0.325308 | 0.259826 | -782.972514 | -783.204778 | 391.37i |
| <b>TS-[4+2]-2a-product</b>  | 0.310586 | 0.328562 | 0.265778 | -782.999823 | -783.227127 |         |
| <b>TS-[4+2]-2b</b>          | 0.237621 | 0.253133 | 0.195779 | -724.247127 | -724.469833 | 420.94i |
| <b>TS-[4+2]-2b-product</b>  | 0.241893 | 0.256608 | 0.200842 | -724.287467 | -724.508786 |         |
| <b>TS-[4+2]-2c</b>          | 0.232283 | 0.246773 | 0.191625 | -649.042349 | -649.232964 | 449.34i |
| <b>TS-[4+2]-2c-product</b>  | 0.237320 | 0.250949 | 0.197596 | -649.093408 | -649.286363 |         |
| <b>TS-[4+2]-2d</b>          | 0.270018 | 0.288150 | 0.224085 | -801.631007 | -801.868475 | 425.17i |
| <b>TS-[4+2]-2d-product</b>  | 0.274468 | 0.291694 | 0.229976 | -801.667434 | -801.906371 |         |
| <b>TS-[4+2]-2e</b>          | 0.248225 | 0.265470 | 0.203530 | -837.558092 | -837.811719 | 429.00i |
| <b>TS-[4+2]-2e-product</b>  | 0.252279 | 0.268827 | 0.208273 | -837.591716 | -837.847917 |         |
| <b>TS-[4+2]-2f</b>          | 0.231201 | 0.247493 | 0.187820 | -741.258484 | -741.476282 | 437.05i |
| <b>TS-[4+2]-2f-product</b>  | 0.235426 | 0.250887 | 0.193110 | -741.291971 | -741.510850 |         |
| <b>TS-[4+2]-3a</b>          | 0.336063 | 0.356107 | 0.288053 | -822.268878 | -822.510489 | 400.97i |
| <b>TS-[4+2]-3a-product</b>  | 0.341295 | 0.359803 | 0.295929 | -822.307680 | -822.542582 |         |
| <b>TS-[4+2]-3b</b>          | 0.267391 | 0.283938 | 0.224003 | -763.543998 | -763.776086 | 440.66i |
| <b>TS-[4+2]-3b-product</b>  | 0.271680 | 0.287608 | 0.228110 | -763.590164 | -763.819591 |         |
| <b>TS-[4+2]-3c</b>          | 0.262012 | 0.277568 | 0.219479 | -688.339288 | -688.539462 | 454.69i |
| <b>TS-[4+2]-3c-product</b>  | 0.266928 | 0.281814 | 0.225510 | -688.394321 | -688.595702 |         |
| <b>TS-[4+2]-3d</b>          | 0.299773 | 0.318985 | 0.252145 | -840.927519 | -841.174085 | 422.59i |
| <b>TS-[4+2]-3d-product</b>  | 0.303821 | 0.322247 | 0.257456 | -840.967353 | -841.215696 |         |
| <b>TS-[4+2]-3e</b>          | 0.277863 | 0.296222 | 0.231415 | -876.854435 | -877.117288 | 419.27i |
| <b>TS-[4+2]-3e-product</b>  | 0.282424 | 0.300108 | 0.236298 | -876.899206 | -877.164748 |         |
| <b>TS-[4+2]-3f</b>          | 0.260935 | 0.278310 | 0.215880 | -780.554925 | -780.781872 | 432.97i |
| <b>TS-[4+2]-3f-product</b>  | 0.265442 | 0.282088 | 0.220826 | -780.595288 | -780.824509 |         |
| <b>TS-[4+2]-4a</b>          | 0.306030 | 0.325226 | 0.258797 | -782.965105 | -783.197001 | 417.86i |



|                     |          |          |          |             |             |         |
|---------------------|----------|----------|----------|-------------|-------------|---------|
| TS-[4+2]-4a-product | 0.311288 | 0.329232 | 0.266339 | -783.004528 | -783.230537 |         |
| TS-[4+2]-4b         | 0.237482 | 0.253102 | 0.195385 | -724.244635 | -724.467450 | 445.96i |
| TS-[4+2]-4b-product | 0.241656 | 0.257032 | 0.198535 | -724.285045 | -724.505540 |         |
| TS-[4+2]-4c         | 0.232013 | 0.246610 | 0.190988 | -649.039359 | -649.230277 | 475.81i |
| TS-[4+2]-4c-product | 0.236787 | 0.251215 | 0.193106 | -649.090767 | -649.282734 |         |
| TS-[4+2]-4d         | 0.269840 | 0.288012 | 0.223943 | -801.628999 | -801.865616 | 446.30i |
| TS-[4+2]-4d-product | 0.274325 | 0.291944 | 0.229035 | -801.663339 | -801.902259 |         |
| TS-[4+2]-4e         | 0.248014 | 0.265333 | 0.203198 | -837.556031 | -837.808904 | 447.00i |
| TS-[4+2]-4e-product | 0.252351 | 0.269350 | 0.207408 | -837.595597 | -837.853785 |         |
| TS-[4+2]-4f         | 0.230870 | 0.247310 | 0.187079 | -741.257018 | -741.474972 | 456.77i |
| TS-[4+2]-4f-product | 0.235470 | 0.251509 | 0.191406 | -741.291199 | -741.511508 |         |
| TS-[4+2]-5a         | 0.336083 | 0.355990 | 0.288671 | -822.261193 | -822.500612 | 392.30i |
| TS-[4+2]-5a-product | 0.340293 | 0.359388 | 0.294056 | -822.303322 | -822.539580 |         |
| TS-[4+2]-5b         | 0.267235 | 0.283808 | 0.223868 | -763.544164 | -763.775770 | 436.98i |
| TS-[4+2]-5b-product | 0.271490 | 0.287457 | 0.228810 | -763.592436 | -763.823002 |         |
| TS-[4+2]-5c         | 0.261849 | 0.277394 | 0.219475 | -688.339037 | -688.539121 | 473.25i |
| TS-[4+2]-5c-product | 0.266703 | 0.281644 | 0.225177 | -688.398531 | -688.601274 |         |
| TS-[4+2]-5d         | 0.299728 | 0.318849 | 0.252590 | -840.926154 | -841.171310 | 451.32i |
| TS-[4+2]-5d-product | 0.304064 | 0.322523 | 0.257946 | -840.969785 | -841.218293 |         |
| TS-[4+2]-5e         | 0.277738 | 0.296058 | 0.231568 | -876.852783 | -877.114539 | 452.16i |
| TS-[4+2]-5e-product | 0.281815 | 0.299667 | 0.235510 | -876.894437 | -877.160846 |         |
| TS-[4+2]-5f         | 0.260633 | 0.278063 | 0.215581 | -780.556437 | -780.783465 | 460.57i |
| TS-[4+2]-5f-product | 0.264933 | 0.281638 | 0.221038 | -780.597087 | -780.825503 |         |
| TS-[4+2]-6a         | 0.343115 | 0.362891 | 0.295840 | -860.349752 | -860.597922 | 420.90i |
| TS-[4+2]-6a-product | 0.347119 | 0.366196 | 0.300694 | -860.372059 | -860.616932 |         |
| TS-[4+2]-6b         | 0.274243 | 0.290579 | 0.231436 | -801.628598 | -801.867410 | 444.09i |
| TS-[4+2]-6b-product | 0.278232 | 0.294132 | 0.235265 | -801.660988 | -801.899763 |         |
| TS-[4+2]-6c         | 0.268797 | 0.284106 | 0.227064 | -726.423633 | -726.631231 | 478.80i |
| TS-[4+2]-6c-product | 0.273609 | 0.288398 | 0.231996 | -726.467058 | -726.677386 |         |
| TS-[4+2]-6d         | 0.306652 | 0.325605 | 0.259905 | -879.012755 | -879.266057 | 448.12i |
| TS-[4+2]-6d-product | 0.310896 | 0.329228 | 0.264854 | -879.041396 | -879.296954 |         |
| TS-[4+2]-6e         | 0.284708 | 0.302850 | 0.238914 | -914.939279 | -915.209111 | 445.01i |
| TS-[4+2]-6e-product | 0.288933 | 0.306768 | 0.242303 | -914.970818 | -915.244190 |         |
| TS-[4+2]-6f         | 0.267782 | 0.284926 | 0.223369 | -818.640558 | -818.875272 | 454.60i |
| TS-[4+2]-6f-product | 0.271740 | 0.288366 | 0.227516 | -818.666470 | -818.902491 |         |
| TS-[4+2]-7a         | 0.288884 | 0.307917 | 0.242307 | -819.846551 | -820.089245 | 328.08i |
| TS-[4+2]-7a-product | 0.293988 | 0.311926 | 0.249154 | -819.908526 | -820.146181 |         |
| TS-[4+2]-7b         | 0.219826 | 0.235648 | 0.177348 | -761.125226 | -761.358259 | 384.90i |
| TS-[4+2]-7b-product | 0.225114 | 0.239890 | 0.183884 | -761.195679 | -761.428512 |         |
| TS-[4+2]-7c         | 0.214375 | 0.229131 | 0.172918 | -685.920149 | -686.122198 | 429.83i |
| TS-[4+2]-7c-product | 0.220326 | 0.234088 | 0.180123 | -686.002544 | -686.207242 |         |
| TS-[4+2]-7d         | 0.252566 | 0.270902 | 0.206190 | -838.508004 | -838.754718 | 417.80i |
| TS-[4+2]-7d-product | 0.257717 | 0.275037 | 0.212876 | -838.573663 | -838.823519 |         |
| TS-[4+2]-7e         | 0.230617 | 0.248093 | 0.185370 | -874.434662 | -874.697772 | 430.89i |

|                             |          |          |          |              |              |         |
|-----------------------------|----------|----------|----------|--------------|--------------|---------|
| <b>TS-[4+2]-7e-product</b>  | 0.235573 | 0.252209 | 0.191168 | -874.498053  | -874.765173  |         |
| <b>TS-[4+2]-7f</b>          | 0.213468 | 0.229999 | 0.169530 | -778.138266  | -778.366462  | 427.41i |
| <b>TS-[4+2]-7f-product</b>  | 0.218556 | 0.234105 | 0.175972 | -778.200621  | -778.429814  |         |
| <b>TS-[4+2]-7ba</b>         | 0.301375 | 0.321736 | 0.252828 | -992.090947  | -992.377850  | 380.67i |
| <b>TS-[4+2]-7ba-product</b> | 0.306500 | 0.325839 | 0.258843 | -992.163254  | -992.447835  |         |
| <b>A1</b>                   | 0.616973 | 0.656146 | 0.546124 | -2109.616141 | -2110.103243 |         |
| <b>A2</b>                   | 0.470986 | 0.514580 | 0.387849 | -3221.567094 | -3222.463847 |         |
| <b>A3</b>                   | 0.638462 | 0.678306 | 0.565880 | -2488.140558 | -2488.728526 |         |
| <b>A4</b>                   | 0.560363 | 0.596941 | 0.489659 | -2031.015071 | -2031.488442 |         |
| <b>B1</b>                   | 0.623438 | 0.660452 | 0.556926 | -1996.533449 | -1996.990766 |         |
| <b>B2</b>                   | 0.476814 | 0.518607 | 0.396322 | -3108.485585 | -3109.352936 |         |
| <b>B3</b>                   | 0.644817 | 0.682515 | 0.576985 | -2375.057970 | -2375.615245 |         |
| <b>B4</b>                   | 0.566481 | 0.601092 | 0.497927 | -1917.933579 | -1918.376794 |         |
| <b>TS-[4+2]-A1-R-1</b>      | 0.917734 | 0.976256 | 0.826517 | -3101.771107 | -3102.518377 | 264.76i |
| <b>TS-[4+2]-A1-R-2</b>      | 0.918586 | 0.977432 | 0.825979 | -3101.763249 | -3102.515096 | 316.03i |
| <b>TS-[4+2]-A1-S-1</b>      | 0.918196 | 0.976358 | 0.827512 | -3101.767805 | -3102.516325 | 247.88i |
| <b>TS-[4+2]-A1-S-2</b>      | 0.917754 | 0.976578 | 0.825007 | -3101.770654 | -3102.518411 | 285.50i |
| <b>TS-[4+2]-A2-R-1</b>      | 0.773015 | 0.835806 | 0.672075 | -4213.730536 | -4214.882426 | 235.51i |
| <b>TS-[4+2]-A2-R-2</b>      | 0.771891 | 0.835104 | 0.669492 | -4213.723561 | -4214.879153 | 205.19i |
| <b>TS-[4+2]-A2-S-1</b>      | 0.772404 | 0.835139 | 0.672519 | -4213.733526 | -4214.884392 | 230.29i |
| <b>TS-[4+2]-A2-S-2</b>      | 0.771181 | 0.834386 | 0.668721 | -4213.725048 | -4214.880141 | 214.04i |
| <b>TS-[4+2]-A3-R-1</b>      | 0.939168 | 0.998683 | 0.845699 | -3480.297461 | -3481.145363 | 293.83i |
| <b>TS-[4+2]-A3-R-2</b>      | 0.940376 | 0.999641 | 0.849014 | -3480.294142 | -3481.140642 | 338.33i |
| <b>TS-[4+2]-A3-S-1</b>      | 0.939348 | 0.998472 | 0.847119 | -3480.298781 | -3481.145195 | 240.86i |
| <b>TS-[4+2]-A3-S-2</b>      | 0.940611 | 0.999816 | 0.849417 | -3480.298701 | -3481.145652 | 318.05i |
| <b>TS-[4+2]-A4-R-1</b>      | 0.861175 | 0.917349 | 0.768373 | -3023.166555 | -3023.900617 | 312.88i |
| <b>TS-[4+2]-A4-R-2</b>      | 0.861165 | 0.916852 | 0.771386 | -3023.165519 | -3023.899941 | 289.23i |
| <b>TS-[4+2]-A4-S-1</b>      | 0.860553 | 0.916310 | 0.770548 | -3023.169830 | -3023.901988 | 261.12i |
| <b>TS-[4+2]-A4-S-2</b>      | 0.861870 | 0.917811 | 0.770038 | -3023.168463 | -3023.902913 | 295.60i |
| <b>TS-[4+2]-B1-R</b>        | 0.923816 | 0.980459 | 0.836343 | -2988.683662 | -2989.404386 | 228.25i |
| <b>TS-[4+2]-B1-S</b>        | 0.924086 | 0.980637 | 0.836154 | -2988.689629 | -2989.407087 | 285.74i |
| <b>TS-[4+2]-B2-R</b>        | 0.779333 | 0.840101 | 0.684244 | -4100.650353 | -4101.771608 | 233.79i |
| <b>TS-[4+2]-B2-S</b>        | 0.778399 | 0.839348 | 0.682408 | -4100.652529 | -4101.774562 | 218.61i |
| <b>TS-[4+2]-B3-R</b>        | 0.945807 | 1.003191 | 0.856523 | -3367.208932 | -3368.027374 | 261.06i |
| <b>TS-[4+2]-B3-S</b>        | 0.945535 | 1.002796 | 0.856641 | -3367.212787 | -3368.031168 | 241.60i |
| <b>TS-[4+2]-B4-R</b>        | 0.867371 | 0.921107 | 0.781355 | -2910.085297 | -2910.790960 | 232.85i |
| <b>TS-[4+2]-B4-S</b>        | 0.867893 | 0.921322 | 0.782539 | -2910.088747 | -2910.791439 | 230.86i |
| <b>TS-(3+2)-B2-1R2S5R</b>   | 0.778754 | 0.840609 | 0.681316 | -4100.608767 | -4101.734207 | 542.15i |
| <b>TS-(3+2)-B2-1R2S5S</b>   | 0.778870 | 0.840999 | 0.677922 | -4100.590902 | -4101.718897 | 577.13i |
| <b>TS-(3+2)-B2-1S2R5R</b>   | 0.779688 | 0.841513 | 0.680285 | -4100.607060 | -4101.735685 | 515.77i |
| <b>TS-(3+2)-B2-1S2R5S</b>   | 0.779338 | 0.840899 | 0.681884 | -4100.607988 | -4101.732982 | 555.73i |
| <b>TS-(3+2)-B2-3R5R</b>     | 0.779606 | 0.841595 | 0.679468 | -4100.610432 | -4101.739584 | 584.51i |
| <b>TS-(3+2)-B2-3R5S</b>     | 0.779825 | 0.841632 | 0.682789 | -4100.613369 | -4101.740352 | 594.08i |
| <b>TS-(3+2)-B2-3S5R</b>     | 0.779168 | 0.841422 | 0.678419 | -4100.605985 | -4101.737808 | 595.88i |

|                           |          |          |          |              |              |          |
|---------------------------|----------|----------|----------|--------------|--------------|----------|
| <b>TS-(3+2)-B2-3S5S</b>   | 0.779532 | 0.841525 | 0.680588 | -4100.612346 | -4101.744617 | 585.29i  |
| <b>TS-(3+2)-B4-1R2S5R</b> | 0.868552 | 0.923348 | 0.780093 | -2910.043557 | -2910.753310 | 533.61i  |
| <b>TS-(3+2)-B4-1R2S5S</b> | 0.869560 | 0.923559 | 0.785147 | -2910.059033 | -2910.764168 | 507.39i  |
| <b>TS-(3+2)-B4-1S2R5R</b> | 0.869354 | 0.923890 | 0.782065 | -2910.051520 | -2910.757921 | 501.20i  |
| <b>TS-(3+2)-B4-1S2R5S</b> | 0.868778 | 0.923509 | 0.780225 | -2910.042629 | -2910.756033 | 555.16i  |
| <b>TS-(3+2)-B4-3R5R</b>   | 0.869781 | 0.924187 | 0.783926 | -2910.056188 | -2910.764979 | 528.75i  |
| <b>TS-(3+2)-B4-3R5S</b>   | 0.868829 | 0.923642 | 0.781086 | -2910.048770 | -2910.760694 | 582.43i  |
| <b>TS-(3+2)-B4-3S5R</b>   | 0.869278 | 0.924199 | 0.780013 | -2910.045947 | -2910.757872 | 582.79i  |
| <b>TS-(3+2)-B4-3S5S</b>   | 0.869357 | 0.923853 | 0.783190 | -2910.054420 | -2910.765464 | 580.58i  |
| <b>TS-[4+2]-B2-R-2</b>    | 0.779543 | 0.840531 | 0.683994 | -4100.632350 | -4101.761251 | 299.16i  |
| <b>TS-[4+2]-B2-R-3</b>    | 0.778828 | 0.840820 | 0.677570 | -4100.625438 | -4101.755247 | 254.49i  |
| <b>TS-[4+2]-B2-S-2</b>    | 0.778330 | 0.839795 | 0.680250 | -4100.628400 | -4101.758360 | 322.01i  |
| <b>TS-[4+2]-B2-S-3</b>    | 0.778500 | 0.840177 | 0.680235 | -4100.632263 | -4101.760170 | 197.51i  |
| <b>TS-[4+2]-B4-R-2</b>    | 0.869727 | 0.923693 | 0.782694 | -2910.065212 | -2910.777667 | 364.13i  |
| <b>TS-[4+2]-B4-R-3</b>    | 0.868342 | 0.923167 | 0.779458 | -2910.067820 | -2910.776756 | 223.72i  |
| <b>TS-[4+2]-B4-S-2</b>    | 0.870036 | 0.922999 | 0.785333 | -2910.064301 | -2910.777292 | 360.18i  |
| <b>TS-[4+2]-B4-S-3</b>    | 0.868567 | 0.922775 | 0.782139 | -2910.070951 | -2910.779309 | 220.32i  |
| <b><sup>1</sup>INT0</b>   | 0.221567 | 0.234757 | 0.182378 | -615.695244  | -615.862086  |          |
| <b><sup>3</sup>INT0</b>   | 0.218453 | 0.231942 | 0.177710 | -615.584301  | -615.748467  |          |
| <b><sup>3</sup>TS1</b>    | 0.213407 | 0.226132 | 0.174094 | -615.567654  | -615.734065  | 1292.68i |
| <b><sup>3</sup>INT1</b>   | 0.218135 | 0.231571 | 0.178236 | -615.601916  | -615.773105  |          |
| <b><sup>3</sup>INT2</b>   | 0.218297 | 0.231665 | 0.178613 | -615.601859  | -615.773340  |          |

## 15. Cartesian Coordinates of the Structures

### 1a

|   |           |           |           |
|---|-----------|-----------|-----------|
| C | -3.416499 | 0.178146  | 0.117920  |
| C | -2.247740 | -0.452925 | -0.033163 |
| H | -3.461437 | 1.253450  | 0.265416  |
| H | -4.358047 | -0.357829 | 0.098145  |
| H | -2.247748 | -1.533161 | -0.182469 |
| C | -0.943018 | 0.186959  | -0.010913 |
| C | 0.193594  | -0.519115 | -0.174553 |
| H | -0.917073 | 1.262600  | 0.139676  |
| H | 0.131972  | -1.600217 | -0.294928 |
| N | 1.480582  | -0.029720 | -0.256541 |
| C | 1.670959  | 1.381470  | -0.008295 |
| H | 2.714904  | 1.640986  | -0.195785 |
| H | 1.042809  | 1.961936  | -0.689047 |
| H | 1.414815  | 1.664040  | 1.025388  |
| C | 2.546312  | -0.892422 | 0.215838  |
| H | 2.352323  | -1.918703 | -0.104621 |
| H | 3.496904  | -0.572565 | -0.219086 |
| H | 2.644852  | -0.885181 | 1.312099  |

### 1b

|   |           |           |           |
|---|-----------|-----------|-----------|
| C | -2.469416 | -0.231109 | 0.000226  |
| C | -1.288167 | 0.391194  | -0.000243 |
| H | -2.536252 | -1.315294 | 0.000535  |
| H | -3.401336 | 0.321593  | 0.000370  |
| H | -1.260651 | 1.480415  | -0.000542 |
| C | 0.002717  | -0.281199 | -0.000307 |
| C | 1.159547  | 0.391382  | 0.000202  |
| H | 0.008375  | -1.371035 | -0.000701 |
| H | 1.196086  | 1.477300  | 0.000442  |
| O | 2.403486  | -0.139063 | 0.000046  |
| H | 2.337796  | -1.102083 | 0.000259  |

### 1c

|   |           |           |           |
|---|-----------|-----------|-----------|
| C | -1.839772 | 0.110555  | 0.000134  |
| C | -0.608788 | -0.403996 | 0.000006  |
| H | -1.998884 | 1.185418  | 0.000240  |
| H | -2.722196 | -0.519074 | 0.000139  |
| H | -0.472039 | -1.484584 | -0.000099 |
| C | 0.608792  | 0.403888  | -0.000006 |
| C | 1.839843  | -0.110519 | -0.000134 |
| H | 0.471720  | 1.484433  | 0.000099  |
| H | 1.998980  | -1.185464 | -0.000240 |
| H | 2.721964  | 0.519700  | -0.000138 |

### 1d

|   |           |           |           |
|---|-----------|-----------|-----------|
| C | -3.362063 | 0.211545  | 0.000192  |
| C | -2.229105 | -0.495984 | -0.000098 |
| H | -3.343425 | 1.297687  | 0.000495  |
| H | -4.334684 | -0.267405 | 0.000136  |
| H | -2.264351 | -1.583876 | -0.000406 |
| C | -0.912655 | 0.123438  | -0.000005 |
| C | 0.244420  | -0.553078 | -0.000231 |
| H | -0.859562 | 1.211873  | 0.000214  |
| H | 0.259970  | -1.641137 | -0.000483 |

|   |          |           |           |
|---|----------|-----------|-----------|
| C | 1.544843 | 0.171469  | -0.000064 |
| O | 1.601839 | 1.384926  | -0.000158 |
| C | 2.790689 | -0.686270 | 0.000261  |
| H | 2.797406 | -1.336183 | 0.881137  |
| H | 2.797918 | -1.336078 | -0.880694 |
| H | 3.675250 | -0.050997 | 0.000537  |

### 1e

|   |           |           |           |
|---|-----------|-----------|-----------|
| C | 3.320371  | 0.274934  | 0.000298  |
| C | 2.208144  | -0.464141 | -0.000121 |
| H | 3.271785  | 1.360156  | 0.000548  |
| H | 4.305798  | -0.176943 | 0.000330  |
| H | 2.271879  | -1.550436 | -0.000437 |
| C | 0.875666  | 0.120754  | -0.000175 |
| C | -0.258361 | -0.591057 | -0.000232 |
| H | 0.794743  | 1.207156  | -0.000116 |
| H | -0.268260 | -1.676243 | -0.000271 |
| C | -1.560157 | 0.107485  | -0.000254 |
| O | -1.718884 | 1.306064  | -0.000073 |
| O | -2.592462 | -0.759650 | 0.000353  |
| H | -3.399158 | -0.222850 | 0.000601  |

### 1f

|   |           |           |           |
|---|-----------|-----------|-----------|
| C | 2.836499  | -0.401789 | 0.000176  |
| C | 1.747072  | 0.370161  | 0.000046  |
| H | 2.757664  | -1.485202 | 0.000282  |
| H | 3.834131  | 0.021882  | 0.000182  |
| H | 1.841536  | 1.454157  | -0.000058 |
| C | 0.397501  | -0.173547 | 0.000037  |
| C | -0.704528 | 0.592941  | -0.000092 |
| H | 0.294067  | -1.256752 | 0.000139  |
| H | -0.639037 | 1.676914  | -0.000198 |
| C | -2.020970 | 0.030801  | -0.000100 |
| N | -3.088829 | -0.417486 | -0.000106 |

### 2a

|   |           |           |           |
|---|-----------|-----------|-----------|
| C | -1.251647 | 0.305579  | 0.161084  |
| C | -0.292057 | -0.624493 | -0.015363 |
| H | -0.555541 | -1.667943 | -0.162438 |
| C | 1.125952  | -0.305404 | 0.002631  |
| C | 1.661723  | 1.100938  | 0.196843  |
| C | 2.137714  | -1.181752 | -0.096311 |
| C | 3.152451  | 0.970246  | -0.173231 |
| H | 1.521769  | 1.412524  | 1.240817  |
| C | 3.488261  | -0.523997 | 0.018607  |
| H | 2.007197  | -2.255228 | -0.195230 |
| H | 3.281091  | 1.230796  | -1.227939 |
| H | 3.795993  | 1.632354  | 0.410595  |
| H | 4.211150  | -0.885233 | -0.720494 |
| H | 3.930453  | -0.714692 | 1.006662  |
| H | 1.145579  | 1.839080  | -0.426848 |
| H | -0.971034 | 1.349442  | 0.288995  |
| N | -2.614023 | 0.091612  | 0.253481  |
| C | -3.475926 | 1.155893  | -0.223728 |
| H | -3.568057 | 1.169859  | -1.320756 |
| H | -4.474639 | 1.039521  | 0.205548  |
| H | -3.075929 | 2.120053  | 0.099024  |
| C | -3.093207 | -1.247636 | -0.002618 |

|           |           |           |           |           |           |           |           |
|-----------|-----------|-----------|-----------|-----------|-----------|-----------|-----------|
| H         | -4.168610 | -1.285402 | 0.183302  | H         | 1.155690  | 1.826793  | -0.632715 |
| H         | -2.900338 | -1.572539 | -1.037863 | H         | -1.124196 | 1.391851  | 0.092326  |
| H         | -2.600513 | -1.950118 | 0.674784  | C         | -2.749913 | -0.113965 | -0.012176 |
| <b>2b</b> |           |           |           | O         | -3.059086 | -1.286790 | -0.089728 |
| C         | 2.165131  | -0.335575 | 0.022670  | C         | -3.792861 | 0.980423  | 0.054920  |
| C         | 1.215555  | 0.604796  | -0.051762 | H         | -3.669549 | 1.559467  | 0.975681  |
| H         | 1.507740  | 1.651237  | -0.139117 | H         | -3.662799 | 1.673360  | -0.782506 |
| C         | -0.207842 | 0.309317  | -0.007939 | H         | -4.789373 | 0.542156  | 0.022694  |
| C         | -0.757335 | -1.098599 | 0.119003  | <b>2e</b> |           |           |           |
| C         | -1.203442 | 1.207025  | -0.015276 | C         | 1.335530  | -0.375482 | 0.024796  |
| C         | -2.258642 | -0.921699 | -0.184622 | C         | 0.367447  | 0.550330  | -0.029661 |
| H         | -0.583537 | -1.476030 | 1.135683  | H         | 0.670847  | 1.594154  | -0.096904 |
| C         | -2.560067 | 0.563678  | 0.108527  | C         | -1.053517 | 0.259033  | 0.002923  |
| H         | -1.057205 | 2.282296  | -0.054563 | C         | -1.632962 | -1.138098 | 0.082869  |
| H         | -2.432023 | -1.117160 | -1.246767 | C         | -2.024224 | 1.185221  | 0.024939  |
| H         | -2.890989 | -1.606654 | 0.384350  | C         | -3.130708 | -0.912446 | -0.212945 |
| H         | -3.300993 | 0.982203  | -0.580296 | H         | -1.468415 | -1.552495 | 1.086025  |
| H         | -2.961258 | 0.702530  | 1.121995  | C         | -3.394186 | 0.571769  | 0.125137  |
| H         | -0.275600 | -1.802312 | -0.568430 | H         | -1.846431 | 2.256541  | 0.017528  |
| H         | 1.936857  | -1.392649 | 0.118070  | H         | -3.312009 | -1.071635 | -1.279618 |
| O         | 3.503015  | -0.127064 | -0.003430 | H         | -3.780515 | -1.595278 | 0.337663  |
| H         | 3.672740  | 0.819402  | -0.087090 | H         | -4.121918 | 1.036868  | -0.546794 |
| <b>2c</b> |           |           |           | H         | -3.785044 | 0.694914  | 1.144345  |
| C         | 2.729053  | -0.339569 | 0.016193  | H         | -1.165817 | -1.827579 | -0.627491 |
| C         | 1.767419  | 0.583433  | -0.062102 | H         | 1.130656  | -1.438214 | 0.097533  |
| H         | 2.038190  | 1.633426  | -0.161836 | C         | 2.749374  | 0.046602  | -0.008670 |
| C         | 0.338774  | 0.292465  | -0.013125 | O         | 3.148140  | 1.185901  | -0.086786 |
| C         | -0.225387 | -1.107643 | 0.115332  | O         | 3.588458  | -1.007956 | 0.059194  |
| C         | -0.643277 | 1.204255  | -0.016090 | H         | 4.485323  | -0.642412 | 0.032124  |
| C         | -1.727091 | -0.911018 | -0.178801 | <b>2f</b> |           |           |           |
| H         | -0.049594 | -1.488079 | 1.130277  | C         | 1.813803  | -0.420648 | 0.037895  |
| C         | -2.007486 | 0.579404  | 0.113160  | C         | 0.872884  | 0.535503  | -0.046298 |
| H         | -0.480984 | 2.277389  | -0.057689 | H         | 1.182536  | 1.573687  | -0.144396 |
| H         | -1.911031 | -1.106009 | -1.239275 | C         | -0.552389 | 0.268976  | -0.006420 |
| H         | -2.365790 | -1.585140 | 0.395739  | C         | -1.154396 | -1.115494 | 0.115406  |
| H         | -2.745118 | 1.010165  | -0.571296 | C         | -1.506264 | 1.212634  | -0.013822 |
| H         | -2.398559 | 0.727834  | 1.129056  | C         | -2.648229 | -0.872822 | -0.187241 |
| H         | 0.246123  | -1.814778 | -0.574845 | H         | -0.996965 | -1.502916 | 1.130417  |
| H         | 2.496713  | -1.395201 | 0.121431  | C         | -2.886178 | 0.625737  | 0.103158  |
| H         | 3.778021  | -0.067569 | -0.018960 | H         | -1.311042 | 2.280268  | -0.053826 |
| <b>2d</b> |           |           |           | H         | -2.832890 | -1.063714 | -1.247949 |
| C         | -1.329804 | 0.326171  | 0.021589  | H         | -3.308256 | -1.526467 | 0.385796  |
| C         | -0.337984 | -0.576350 | -0.029811 | H         | -3.604221 | 1.082190  | -0.584663 |
| H         | -0.622515 | -1.625943 | -0.095147 | H         | -3.275530 | 0.788809  | 1.117168  |
| C         | 1.077499  | -0.260069 | 0.003432  | H         | -0.701837 | -1.833921 | -0.575714 |
| C         | 1.634157  | 1.146929  | 0.079499  | H         | 1.553591  | -1.469294 | 0.141470  |
| C         | 2.064883  | -1.168781 | 0.029822  | C         | 3.210190  | -0.110042 | 0.001246  |
| C         | 3.135490  | 0.946030  | -0.215434 | N         | 4.342584  | 0.132614  | -0.027407 |
| H         | 1.462967  | 1.561477  | 1.081601  | <b>3a</b> |           |           |           |
| C         | 3.424023  | -0.531682 | 0.129836  | C         | 0.790489  | 0.295968  | 0.048650  |
| H         | 1.905545  | -2.242989 | 0.025887  | C         | 1.232757  | -1.146871 | -0.078667 |
| H         | 3.313643  | 1.102790  | -1.283057 | C         | 2.708922  | -1.346892 | 0.267951  |
| H         | 3.773725  | 1.642843  | 0.331336  | C         | 3.568762  | -0.273561 | -0.394693 |
| H         | 4.161244  | -0.986812 | -0.538628 | C         | 3.180527  | 1.103535  | 0.143072  |
| H         | 3.815368  | -0.642903 | 1.150294  | C         | 1.687916  | 1.288990  | 0.168965  |

|           |           |           |           |           |           |           |           |
|-----------|-----------|-----------|-----------|-----------|-----------|-----------|-----------|
| C         | -0.642319 | 0.594780  | 0.031164  | H         | 2.316919  | 1.644384  | -0.089735 |
| H         | 2.836531  | -1.281917 | 1.355953  | H         | 0.780941  | -1.738343 | -0.668341 |
| H         | 4.633009  | -0.464544 | -0.225177 | H         | 0.370495  | -1.540034 | 1.024549  |
| H         | 3.589565  | 1.233573  | 1.156132  | H         | -2.200479 | 1.896434  | 0.591301  |
| H         | 1.319909  | 2.308098  | 0.279894  | H         | -1.988501 | -0.353110 | 1.477654  |
| H         | -0.908781 | 1.641260  | 0.153511  | H         | -1.643181 | -2.324829 | -0.074871 |
| H         | 0.615433  | -1.771447 | 0.578027  | C         | 3.029007  | -0.313300 | 0.103191  |
| H         | 1.034541  | -1.493275 | -1.102909 | H         | 2.825532  | -1.375994 | 0.188948  |
| H         | 3.637643  | 1.893032  | -0.465068 | H         | 4.070388  | -0.012681 | 0.125045  |
| H         | 3.402372  | -0.299438 | -1.478971 |           |           |           |           |
| H         | 3.030185  | -2.349084 | -0.032576 | <b>3d</b> |           |           |           |
| C         | -1.607650 | -0.325117 | -0.157120 | C         | 0.739650  | -0.262141 | -0.057521 |
| H         | -1.347623 | -1.375729 | -0.267017 | C         | 1.194185  | 1.179446  | -0.024871 |
| N         | -2.967250 | -0.090557 | -0.287060 | C         | 2.682597  | 1.326610  | -0.346192 |
| C         | -3.849334 | -1.125776 | 0.217071  | C         | 3.505127  | 0.295151  | 0.423973  |
| H         | -3.944429 | -1.108776 | 1.314116  | C         | 3.106656  | -1.118132 | -0.003558 |
| H         | -4.844819 | -1.002988 | -0.217975 | C         | 1.615486  | -1.282166 | -0.068423 |
| H         | -3.466548 | -2.105729 | -0.078335 | C         | -0.689202 | -0.557779 | -0.060418 |
| C         | -3.428874 | 1.260598  | -0.064832 | H         | 2.836323  | 1.174263  | -1.421847 |
| H         | -2.911625 | 1.942674  | -0.744645 | H         | 4.576101  | 0.450920  | 0.264783  |
| H         | -4.499698 | 1.312100  | -0.273220 | H         | 3.534743  | -1.348135 | -0.990030 |
| H         | -3.252089 | 1.602164  | 0.968314  | H         | 1.227088  | -2.298289 | -0.117363 |
|           |           |           |           | H         | -0.979926 | -1.606914 | -0.114065 |
| <b>3b</b> |           |           |           | H         | 0.598365  | 1.759350  | -0.739065 |
| C         | 0.099708  | 0.305217  | -0.057155 | H         | 0.975918  | 1.600436  | 0.966429  |
| C         | -0.347486 | -1.139778 | 0.005089  | H         | 3.524749  | -1.863720 | 0.682214  |
| C         | -1.832355 | -1.310565 | -0.318894 | H         | 3.316848  | 0.414630  | 1.498086  |
| C         | -2.668403 | -0.266725 | 0.417695  | H         | 3.015714  | 2.342849  | -0.116107 |
| C         | -2.280613 | 1.135207  | -0.052773 | C         | -1.685505 | 0.338154  | 0.014375  |
| C         | -0.787701 | 1.311543  | -0.103327 | H         | -1.496065 | 1.406536  | 0.080510  |
| C         | 1.536212  | 0.587989  | -0.050778 | C         | -3.100594 | -0.118332 | 0.016609  |
| H         | -1.982340 | -1.188902 | -1.399013 | O         | -3.401552 | -1.293881 | -0.054298 |
| H         | -3.737357 | -0.439800 | 0.260251  | C         | -4.153069 | 0.965368  | 0.111763  |
| H         | -2.708653 | 1.324649  | -1.048121 | H         | -4.011828 | 1.545260  | 1.029429  |
| H         | -0.412911 | 2.332076  | -0.169238 | H         | -4.052147 | 1.660073  | -0.728197 |
| H         | 1.825874  | 1.637531  | -0.115990 | H         | -5.145454 | 0.516706  | 0.105193  |
| H         | 0.252515  | -1.732512 | -0.695430 |           |           |           |           |
| H         | -0.129870 | -1.538058 | 1.006230  | <b>3e</b> |           |           |           |
| H         | -2.716326 | 1.893939  | 0.607619  | C         | -0.717982 | 0.255894  | -0.058419 |
| H         | -2.480842 | -0.352043 | 1.495368  | C         | -1.192950 | -1.178681 | -0.020079 |
| H         | -2.155195 | -2.324291 | -0.062970 | C         | -2.683322 | -1.304599 | -0.341434 |
| C         | 2.497668  | -0.336342 | 0.052948  | C         | -3.490528 | -0.256863 | 0.423026  |
| H         | 2.294454  | -1.398987 | 0.134993  | C         | -3.070505 | 1.148293  | -0.010839 |
| O         | 3.833125  | -0.098168 | 0.077921  | C         | -1.577080 | 1.289667  | -0.074690 |
| H         | 3.983462  | 0.852462  | 0.006101  | C         | 0.715286  | 0.529529  | -0.060563 |
|           |           |           |           | H         | -2.834223 | -1.155726 | -1.417944 |
| <b>3c</b> |           |           |           | H         | -4.563584 | -0.396877 | 0.263518  |
| C         | 0.614747  | 0.298123  | -0.040182 | H         | -3.493432 | 1.380056  | -0.999071 |
| C         | 0.167647  | -1.144735 | 0.019362  | H         | -1.173233 | 2.299610  | -0.127310 |
| C         | -1.312840 | -1.312544 | -0.326624 | H         | 1.022600  | 1.573371  | -0.117315 |
| C         | -2.157987 | -0.266273 | 0.397164  | H         | -0.605684 | -1.770336 | -0.731598 |
| C         | -1.760398 | 1.136294  | -0.064344 | H         | -0.981045 | -1.598373 | 0.973057  |
| C         | -0.267195 | 1.308102  | -0.098380 | H         | -3.477870 | 1.903576  | 0.670711  |
| C         | 2.053329  | 0.589819  | -0.016747 | H         | -3.305124 | -0.373919 | 1.497873  |
| H         | -1.446656 | -1.191269 | -1.408968 | H         | -3.031687 | -2.314399 | -0.106085 |
| H         | -3.224777 | -0.435704 | 0.222598  | C         | 1.689592  | -0.387982 | 0.018878  |
| H         | -2.171693 | 1.331444  | -1.065438 | H         | 1.502362  | -1.453634 | 0.088591  |
| H         | 0.113151  | 2.326783  | -0.163394 | C         | 3.097815  | 0.052454  | 0.021272  |

|           |           |           |           |           |           |           |           |
|-----------|-----------|-----------|-----------|-----------|-----------|-----------|-----------|
| O         | 3.486440  | 1.195983  | -0.049455 | H         | 1.462767  | -1.493737 | -1.390760 |
| O         | 3.948359  | -0.991673 | 0.113712  | H         | 1.834491  | -2.409390 | 0.077703  |
| H         | 4.840573  | -0.614099 | 0.108596  | H         | -0.760407 | -2.003828 | -0.639717 |
|           |           |           |           | H         | 2.891081  | 0.080670  | -0.161637 |
| <b>3f</b> |           |           |           | C         | -0.434638 | 0.063479  | 0.031411  |
| C         | -0.223905 | 0.258236  | -0.061968 | C         | 0.841384  | 0.810305  | 0.049912  |
| C         | -0.719453 | -1.167922 | 0.010078  | C         | -1.657042 | 0.603293  | 0.018928  |
| C         | -2.211137 | -1.279126 | -0.312069 | H         | -1.829356 | 1.674914  | 0.019893  |
| C         | -3.004479 | -0.200169 | 0.422616  | C         | 1.036842  | 2.116753  | -0.137990 |
| C         | -2.562197 | 1.186674  | -0.046186 | H         | 0.216389  | 2.801410  | -0.328752 |
| C         | -1.066925 | 1.304364  | -0.107706 | H         | 2.034503  | 2.541473  | -0.107556 |
| C         | 1.213129  | 0.512181  | -0.064918 | H         | 2.094188  | -0.335555 | 1.363098  |
| H         | -2.356706 | -1.156627 | -1.392468 | H         | -0.312670 | -1.838258 | 1.063584  |
| H         | -4.078729 | -0.328211 | 0.262357  | O         | -2.825658 | -0.085063 | 0.009776  |
| H         | -2.977152 | 1.399022  | -1.042043 | H         | -2.632480 | -1.030782 | 0.007302  |
| H         | -0.648974 | 2.307138  | -0.183955 |           |           |           |           |
| H         | 1.523321  | 1.552135  | -0.147328 | <b>4c</b> |           |           |           |
| H         | -0.142474 | -1.785969 | -0.687632 | C         | 0.095280  | 0.987476  | -1.203314 |
| H         | -0.516566 | -1.566972 | 1.013598  | C         | -0.478903 | 1.751211  | -0.000000 |
| H         | -2.959924 | 1.965939  | 0.613495  | C         | 0.095280  | 0.987476  | 1.203314  |
| H         | -2.824823 | -0.292013 | 1.500794  | H         | 1.128912  | 1.311398  | -1.382891 |
| H         | -2.574119 | -2.277207 | -0.051143 | H         | -0.462891 | 1.136638  | -2.130297 |
| C         | 2.162968  | -0.432483 | 0.044052  | H         | -0.218808 | 2.811772  | -0.000000 |
| H         | 1.922635  | -1.486060 | 0.139109  | H         | -1.570803 | 1.669249  | -0.000000 |
| C         | 3.554394  | -0.096838 | 0.049187  | H         | 1.128912  | 1.311398  | 1.382891  |
| N         | 4.682734  | 0.165617  | 0.053813  | H         | -0.462891 | 1.136638  | 2.130297  |
|           |           |           |           | C         | 0.095280  | -0.459024 | 0.744888  |
| <b>4a</b> |           |           |           | C         | 0.095280  | -0.459024 | -0.744888 |
| C         | 0.697476  | -1.417280 | 0.018215  | C         | 0.068336  | -1.525972 | 1.542646  |
| C         | 2.766823  | -0.167151 | 0.026486  | H         | 0.065989  | -2.536579 | 1.146322  |
| C         | 2.117785  | -1.421989 | -0.575202 | H         | 0.046122  | -1.420475 | 2.622462  |
| H         | 2.051022  | -1.316388 | -1.662767 | C         | 0.068336  | -1.525972 | -1.542646 |
| H         | 2.670438  | -2.338928 | -0.357487 | H         | 0.065989  | -2.536579 | -1.146322 |
| H         | -0.022729 | -1.982324 | -0.581681 | H         | 0.046122  | -1.420475 | -2.622462 |
| H         | 3.597980  | 0.224517  | -0.565312 |           |           |           |           |
| C         | 0.363551  | 0.057239  | 0.059014  | <b>4d</b> |           |           |           |
| C         | 1.621863  | 0.825816  | 0.153360  | C         | -0.616066 | -1.375319 | 0.018238  |
| C         | -0.847501 | 0.605793  | -0.132182 | C         | -2.679788 | -0.149689 | -0.320557 |
| H         | -0.915275 | 1.685846  | -0.274457 | C         | -2.125868 | -1.437366 | 0.307160  |
| C         | 1.770200  | 2.139950  | 0.341921  | H         | -2.294655 | -1.415320 | 1.388681  |
| H         | 0.921880  | 2.798544  | 0.498850  | H         | -2.594925 | -2.341480 | -0.085967 |
| N         | -2.059138 | -0.083738 | -0.220599 | H         | 0.003790  | -1.908489 | 0.740159  |
| C         | -3.194917 | 0.730747  | -0.610888 | H         | -3.642267 | 0.166625  | 0.087161  |
| H         | -4.026231 | 0.081525  | -0.898467 | C         | -0.294449 | 0.103694  | -0.022676 |
| H         | -3.541090 | 1.391341  | 0.201827  | C         | -1.576080 | 0.854208  | -0.065657 |
| H         | -2.931501 | 1.344930  | -1.473896 | C         | 0.927612  | 0.663658  | -0.054301 |
| C         | -2.389743 | -1.002540 | 0.858311  | H         | 1.021128  | 1.745978  | -0.111533 |
| H         | -2.699898 | -0.466997 | 1.770234  | C         | -1.733507 | 2.159877  | 0.154570  |
| H         | -3.212874 | -1.649267 | 0.541281  | H         | -0.892525 | 2.807626  | 0.381936  |
| H         | -1.536569 | -1.632458 | 1.104613  | H         | -2.716117 | 2.619480  | 0.125424  |
| H         | 2.755056  | 2.595233  | 0.354397  | H         | -2.801808 | -0.288581 | -1.402735 |
| H         | 3.155486  | -0.394070 | 1.027541  | H         | -0.375524 | -1.813709 | -0.958398 |
| H         | 0.715051  | -1.858847 | 1.025304  | C         | 2.184418  | -0.115162 | -0.026578 |
|           |           |           |           | O         | 2.208541  | -1.332871 | -0.058248 |
| <b>4b</b> |           |           |           | C         | 3.464421  | 0.693639  | 0.035281  |
| C         | -0.142335 | -1.427025 | 0.059285  | H         | 3.532573  | 1.354954  | -0.834342 |
| C         | 1.937509  | -0.212144 | 0.283329  | H         | 3.466793  | 1.329280  | 0.926309  |
| C         | 1.352740  | -1.505730 | -0.301770 | H         | 4.321052  | 0.021361  | 0.056408  |

|           |           |           |           |
|-----------|-----------|-----------|-----------|
| <b>4e</b> |           |           |           |
| C         | -0.545592 | -1.373061 | 0.003644  |
| C         | -2.649812 | -0.214623 | -0.315810 |
| C         | -2.049873 | -1.484856 | 0.305120  |
| H         | -2.209891 | -1.470240 | 1.388036  |
| H         | -2.491882 | -2.403190 | -0.086213 |
| H         | 0.096973  | -1.894297 | 0.713969  |
| H         | -3.619476 | 0.068518  | 0.099054  |
| C         | -0.273430 | 0.116621  | -0.023796 |
| C         | -1.578637 | 0.824959  | -0.064754 |
| C         | 0.925601  | 0.720018  | -0.045737 |
| H         | 1.010992  | 1.800356  | -0.094707 |
| C         | -1.775071 | 2.125297  | 0.154266  |
| H         | -0.953467 | 2.798929  | 0.376899  |
| H         | -2.771543 | 2.554176  | 0.128009  |
| H         | -2.774467 | -0.354847 | -1.397485 |
| H         | -0.304808 | -1.790693 | -0.981985 |
| C         | 2.186952  | -0.034580 | -0.020040 |
| O         | 2.311016  | -1.240089 | -0.044305 |
| O         | 3.256415  | 0.789628  | 0.027196  |
| H         | 4.037284  | 0.216329  | 0.033933  |
| <b>4f</b> |           |           |           |
| C         | -0.041874 | -1.334870 | 0.120561  |
| C         | 2.202455  | -0.451528 | 0.226178  |
| C         | 1.399276  | -1.644124 | -0.316596 |
| H         | 1.456207  | -1.658224 | -1.409531 |
| H         | 1.757085  | -2.606669 | 0.053102  |
| H         | -0.811242 | -1.821865 | -0.483064 |
| H         | 3.157942  | -0.295002 | -0.278652 |
| C         | -0.124854 | 0.173602  | 0.055605  |
| C         | 1.253915  | 0.718800  | 0.056658  |
| C         | -1.258967 | 0.890708  | 0.006627  |
| H         | -1.255775 | 1.975248  | -0.019856 |
| C         | 1.597152  | 1.995892  | -0.113005 |
| H         | 0.856541  | 2.776972  | -0.254406 |
| C         | -2.536389 | 0.248354  | -0.006305 |
| N         | -3.564705 | -0.286021 | -0.017082 |
| H         | 2.638566  | 2.300179  | -0.121064 |
| H         | 2.408414  | -0.600306 | 1.293989  |
| H         | -0.199082 | -1.649188 | 1.160713  |
| <b>5a</b> |           |           |           |
| C         | -1.400313 | -1.855587 | 0.268261  |
| C         | -0.483517 | -0.925415 | 1.100658  |
| C         | -2.634310 | 0.317638  | -0.143853 |
| C         | -2.285802 | -1.062048 | -0.711787 |
| H         | -0.797968 | -2.578339 | -0.291816 |
| H         | -2.027849 | -2.437652 | 0.951194  |
| H         | -1.747663 | -0.916042 | -1.655429 |
| H         | -3.192665 | -1.626742 | -0.946540 |
| H         | 0.438158  | -1.428021 | 1.400454  |
| H         | -3.350820 | 0.845246  | -0.779998 |
| C         | -0.173002 | 0.343792  | 0.347526  |
| C         | -1.374330 | 1.149926  | 0.015924  |
| C         | 1.054702  | 0.678228  | -0.070225 |
| H         | 1.196089  | 1.592130  | -0.654858 |

|           |           |           |           |
|-----------|-----------|-----------|-----------|
| C         | -1.372982 | 2.478871  | -0.112084 |
| H         | -0.478771 | 3.067006  | 0.067763  |
| N         | 2.215246  | -0.104971 | 0.169467  |
| C         | 3.423095  | 0.701948  | 0.162732  |
| H         | 4.279118  | 0.078670  | 0.434856  |
| H         | 3.626520  | 1.155343  | -0.824298 |
| H         | 3.335111  | 1.503036  | 0.899882  |
| C         | 2.333098  | -1.236902 | -0.744566 |
| H         | 2.495985  | -0.922123 | -1.789581 |
| H         | 3.176597  | -1.862244 | -0.436980 |
| H         | 1.423532  | -1.839459 | -0.705912 |
| H         | -3.115886 | 0.190660  | 0.836210  |
| H         | -1.011067 | -0.645994 | 2.021294  |
| H         | -2.274973 | 3.016628  | -0.388023 |
| <b>5b</b> |           |           |           |
| C         | -0.640029 | 0.054175  | 0.086011  |
| C         | 0.386357  | 1.121052  | 0.015819  |
| C         | 1.720794  | 0.698327  | -0.557988 |
| C         | 2.201768  | -0.616546 | 0.066950  |
| C         | 1.147674  | -1.709815 | -0.107657 |
| C         | -0.175555 | -1.307077 | 0.557413  |
| H         | 1.606515  | 0.543294  | -1.639959 |
| H         | 3.148217  | -0.924104 | -0.388801 |
| H         | 0.974816  | -1.875821 | -1.178300 |
| H         | -0.925149 | -2.082126 | 0.353938  |
| C         | -1.900720 | 0.324757  | -0.278658 |
| C         | 0.156653  | 2.368403  | 0.435841  |
| H         | -2.177171 | 1.295091  | -0.678920 |
| H         | 0.911040  | 3.143087  | 0.335754  |
| H         | -0.788039 | 2.645539  | 0.892399  |
| H         | 2.459428  | 1.492687  | -0.416885 |
| H         | 2.392998  | -0.461741 | 1.136567  |
| H         | 1.500626  | -2.656086 | 0.314553  |
| H         | -0.029055 | -1.288672 | 1.646246  |
| O         | -2.967551 | -0.512462 | -0.236210 |
| H         | -2.715472 | -1.331100 | 0.206696  |
| <b>5c</b> |           |           |           |
| C         | 0.710268  | -0.739596 | -0.070897 |
| C         | 0.710109  | 0.739642  | 0.070749  |
| C         | -0.544441 | 1.463379  | -0.398253 |
| C         | -1.737269 | 0.512631  | -0.566136 |
| C         | -1.737022 | -0.512867 | 0.566381  |
| C         | -0.544231 | -1.463523 | 0.397949  |
| H         | -0.795914 | 2.243959  | 0.328295  |
| H         | -2.669283 | 1.084404  | -0.590222 |
| H         | -1.661616 | 0.017009  | 1.524442  |
| H         | -0.332580 | -1.972248 | 1.345334  |
| C         | 1.751824  | -1.391724 | -0.591820 |
| C         | 1.751354  | 1.392046  | 0.591951  |
| H         | 2.628755  | -0.858285 | -0.943404 |
| H         | 1.749048  | 2.474545  | 0.687365  |
| H         | 2.628327  | 0.859013  | 0.943982  |
| H         | -0.332831 | 1.971632  | -1.345897 |
| H         | -1.662287 | -0.017265 | -1.524218 |
| H         | -2.669003 | -1.084676 | 0.590850  |
| H         | -0.795892 | -2.243750 | -0.328930 |



|           |           |           |           |           |           |           |           |
|-----------|-----------|-----------|-----------|-----------|-----------|-----------|-----------|
| H         | 1.749726  | -2.474257 | -0.687137 | C         | -1.999133 | -1.162684 | -0.604296 |
| <b>5d</b> |           |           |           | C         | -1.205667 | -1.673215 | 0.597454  |
| C         | 0.060841  | 0.175914  | -0.110983 | C         | 0.243594  | -1.192601 | 0.486420  |
| C         | 1.215715  | 1.109817  | -0.078711 | H         | -3.005429 | 0.605210  | 0.133671  |
| C         | 2.483084  | 0.632714  | 0.613103  | H         | -2.984063 | -1.633295 | -0.663390 |
| C         | 2.566278  | -0.899089 | 0.707124  | H         | -1.660888 | -1.292391 | 1.520173  |
| C         | 1.884985  | -1.530766 | -0.505321 | H         | 0.775502  | -1.316801 | 1.436804  |
| C         | 0.379557  | -1.271739 | -0.426966 | C         | 1.510206  | 0.826426  | -0.275917 |
| H         | 3.344594  | 1.019565  | 0.059277  | C         | -0.951330 | 2.297568  | 0.511982  |
| H         | 3.611500  | -1.208923 | 0.791172  | H         | 1.567318  | 1.853280  | -0.619176 |
| H         | 2.301023  | -1.096766 | -1.423580 | H         | -1.871497 | 2.874777  | 0.504340  |
| H         | -0.133218 | -1.550379 | -1.353462 | H         | -0.071528 | 2.765905  | 0.940543  |
| C         | -1.183971 | 0.637978  | 0.127116  | C         | 2.732782  | 0.084628  | -0.215819 |
| C         | 1.149611  | 2.301147  | -0.680043 | N         | 3.711238  | -0.534190 | -0.164233 |
| H         | -1.309304 | 1.685287  | 0.391042  | H         | -2.386534 | 0.775131  | -1.502457 |
| H         | 2.000216  | 2.976955  | -0.682457 | H         | -1.461789 | -1.432307 | -1.522175 |
| H         | 0.254057  | 2.621990  | -1.201611 | H         | -1.226370 | -2.764517 | 0.655587  |
| H         | 2.530061  | 1.073902  | 1.615210  | H         | 0.784096  | -1.805361 | -0.244748 |
| H         | 2.057385  | -1.248763 | 1.613893  | <b>6a</b> |           |           |           |
| H         | 2.068568  | -2.607865 | -0.547235 | C         | -1.273285 | -1.640700 | -0.616476 |
| H         | -0.074647 | -1.907687 | 0.340603  | C         | -0.556481 | -0.987021 | 0.592031  |
| C         | -2.410561 | -0.185682 | 0.071465  | C         | -2.355820 | 0.350422  | 0.287132  |
| O         | -2.406379 | -1.371193 | -0.211618 | C         | -2.508333 | -0.713427 | -0.830551 |
| C         | -3.703853 | 0.536658  | 0.394047  | H         | -0.629722 | -1.685273 | -1.499076 |
| H         | -3.852439 | 1.371302  | -0.298304 | H         | -1.583692 | -2.661780 | -0.374339 |
| H         | -4.538773 | -0.158853 | 0.320232  | H         | -2.525559 | -0.254200 | -1.821390 |
| H         | -3.658099 | 0.958067  | 1.403176  | H         | -3.442648 | -1.267249 | -0.698660 |
| <b>5e</b> |           |           |           | C         | -1.764075 | -0.502823 | 1.423809  |
| C         | 0.042146  | 0.194465  | -0.100743 | H         | -1.469519 | 0.084442  | 2.296938  |
| C         | 1.221732  | 1.096560  | -0.072081 | H         | -2.422785 | -1.322087 | 1.730481  |
| C         | 2.482749  | 0.578119  | 0.601066  | H         | 0.158120  | -1.626262 | 1.113189  |
| C         | 2.522825  | -0.956007 | 0.683681  | H         | -3.268310 | 0.909404  | 0.501580  |
| C         | 1.812860  | -1.559603 | -0.526655 | C         | 0.010533  | 0.346009  | 0.142072  |
| C         | 0.315956  | -1.259897 | -0.432232 | C         | -1.166942 | 1.218196  | -0.087318 |
| H         | 3.348315  | 0.943780  | 0.039299  | C         | 1.294936  | 0.718946  | 0.050877  |
| H         | 3.559422  | -1.296245 | 0.755225  | H         | 1.518804  | 1.768247  | -0.152020 |
| H         | 2.231688  | -1.130508 | -1.445843 | C         | -1.222403 | 2.467240  | -0.553555 |
| H         | -0.210684 | -1.514963 | -1.357593 | H         | -0.332443 | 3.010759  | -0.855457 |
| C         | -1.182961 | 0.692329  | 0.152776  | N         | 2.413003  | -0.106541 | 0.227858  |
| C         | 1.179621  | 2.294952  | -0.660992 | C         | 3.678872  | 0.602730  | 0.256462  |
| H         | -1.304257 | 1.734108  | 0.427728  | H         | 4.463915  | -0.069334 | 0.613005  |
| H         | 2.047758  | 2.948025  | -0.666061 | H         | 3.975943  | 0.981293  | -0.736545 |
| H         | 0.286805  | 2.645065  | -1.168147 | H         | 3.615909  | 1.445326  | 0.947674  |
| H         | 2.554384  | 1.010617  | 1.605404  | C         | 2.481056  | -1.305270 | -0.595769 |
| H         | 2.013004  | -1.297575 | 1.593012  | H         | 2.717970  | -1.068519 | -1.646232 |
| H         | 1.965699  | -2.641035 | -0.578091 | H         | 3.261056  | -1.966016 | -0.206696 |
| H         | -0.146967 | -1.889055 | 0.335400  | H         | 1.534842  | -1.843799 | -0.571852 |
| C         | -2.410894 | -0.114493 | 0.093296  | H         | -2.171235 | 2.985017  | -0.647878 |
| O         | -2.497818 | -1.291812 | -0.183156 | <b>6b</b> |           |           |           |
| O         | -3.501075 | 0.624983  | 0.395396  | C         | -0.761521 | -1.547031 | -0.827999 |
| H         | -4.258224 | 0.023868  | 0.333063  | C         | 0.038254  | -1.122001 | 0.427644  |
| <b>5f</b> |           |           |           | C         | -1.599342 | 0.432022  | 0.329510  |
| C         | 0.337004  | 0.260883  | 0.063729  | C         | -1.877266 | -0.461544 | -0.906899 |
| C         | -0.916475 | 1.049610  | 0.035990  | H         | -0.132419 | -1.570479 | -1.720649 |
| C         | -2.157229 | 0.361002  | -0.514467 | H         | -1.190714 | -2.544102 | -0.689272 |
|           |           |           |           | H         | -1.839491 | 0.115392  | -1.833388 |

|           |           |           |           |           |           |           |           |
|-----------|-----------|-----------|-----------|-----------|-----------|-----------|-----------|
| H         | -2.870620 | -0.913137 | -0.831015 | H         | -0.305700 | 3.133064  | -0.248239 |
| C         | -1.092873 | -0.611792 | 1.344330  | H         | -2.155273 | 3.059784  | -0.203871 |
| H         | -0.723505 | -0.166599 | 2.271325  | C         | 2.487120  | -0.173702 | -0.013443 |
| H         | -1.835480 | -1.383780 | 1.570075  | O         | 2.388993  | -1.382716 | 0.092487  |
| H         | 0.668214  | -1.911090 | 0.849565  | C         | 3.843537  | 0.495422  | -0.110047 |
| H         | -2.443043 | 1.053398  | 0.633966  | H         | 3.924154  | 1.045075  | -1.053300 |
| C         | 0.743512  | 0.183808  | 0.098878  | H         | 3.964235  | 1.222358  | 0.699242  |
| C         | -0.326278 | 1.210334  | 0.047666  | H         | 4.627722  | -0.258272 | -0.053476 |
| C         | 2.047388  | 0.373599  | -0.116736 |           |           |           |           |
| H         | 2.463492  | 1.350560  | -0.343109 | <b>6e</b> |           |           |           |
| C         | -0.240825 | 2.519002  | -0.192174 | C         | -1.063489 | -1.562325 | -0.833308 |
| H         | 0.706352  | 3.008681  | -0.396016 | C         | -0.429335 | -1.024966 | 0.477086  |
| H         | -1.127480 | 3.144037  | -0.188271 | C         | -2.310132 | 0.226882  | 0.251244  |
| O         | 3.016111  | -0.576328 | -0.082060 | C         | -2.349565 | -0.697756 | -0.991698 |
| H         | 2.609505  | -1.430639 | 0.107947  | H         | -0.377108 | -1.473767 | -1.677857 |
|           |           |           |           | H         | -1.309570 | -2.620599 | -0.711864 |
| <b>6c</b> |           |           |           | H         | -2.362541 | -0.123437 | -1.920800 |
| C         | -1.459107 | -0.778773 | -0.856773 | H         | -3.248997 | -1.319420 | -0.969375 |
| C         | -0.593835 | -1.132124 | 0.378596  | C         | -1.691707 | -0.709995 | 1.306548  |
| C         | -0.594202 | 1.131606  | 0.379555  | H         | -1.474497 | -0.207105 | 2.252553  |
| C         | -1.459449 | 0.779036  | -0.856062 | H         | -2.297537 | -1.601705 | 1.494444  |
| H         | -1.042842 | -1.201545 | -1.773788 | H         | 0.320618  | -1.678957 | 0.912597  |
| H         | -2.471871 | -1.173372 | -0.733186 | H         | -3.261706 | 0.700106  | 0.497668  |
| H         | -1.043478 | 1.202850  | -1.772727 | C         | 0.064533  | 0.368407  | 0.148708  |
| H         | -2.472374 | 1.173064  | -0.731961 | C         | -1.167526 | 1.201818  | 0.053616  |
| C         | -0.986701 | -0.000724 | 1.351175  | C         | 1.318385  | 0.790186  | -0.071057 |
| H         | -0.396032 | -0.001041 | 2.270945  | H         | 1.522820  | 1.828086  | -0.313492 |
| H         | -2.053707 | -0.000997 | 1.595776  | C         | -1.246695 | 2.518028  | -0.134123 |
| H         | -0.710185 | -2.157357 | 0.733670  | H         | -0.360464 | 3.136362  | -0.239477 |
| H         | -0.710840 | 2.156512  | 0.735479  | H         | -2.207616 | 3.020222  | -0.179543 |
| C         | 0.835416  | -0.746034 | 0.048288  | C         | 2.489354  | -0.100162 | -0.011703 |
| C         | 0.835113  | 0.746249  | 0.048634  | O         | 2.488789  | -1.303334 | 0.131413  |
| C         | 1.856886  | -1.568295 | -0.181410 | O         | 3.638679  | 0.595382  | -0.156391 |
| H         | 2.849670  | -1.194088 | -0.412395 | H         | 4.353908  | -0.056878 | -0.116902 |
| C         | 1.856043  | 1.569047  | -0.181552 |           |           |           |           |
| H         | 2.848812  | 1.195375  | -0.413462 | <b>6f</b> |           |           |           |
| H         | 1.731572  | -2.645550 | -0.140726 | C         | -0.590578 | -1.607539 | -0.832135 |
| H         | 1.730289  | 2.646231  | -0.140329 | C         | 0.079035  | -1.006761 | 0.432140  |
|           |           |           |           | C         | -1.912659 | 0.072832  | 0.331772  |
| <b>6d</b> |           |           |           | C         | -1.959570 | -0.867672 | -0.898406 |
| C         | -1.117926 | -1.559285 | -0.814528 | H         | 0.020889  | -1.456697 | -1.724263 |
| C         | -0.481980 | -1.022055 | 0.494832  | H         | -0.726547 | -2.683825 | -0.697647 |
| C         | -2.328205 | 0.273958  | 0.239412  | H         | -2.094521 | -0.310405 | -1.827901 |
| C         | -2.378174 | -0.661516 | -0.995397 | H         | -2.792452 | -1.569695 | -0.803399 |
| H         | -0.420596 | -1.500369 | -1.652547 | C         | -1.145780 | -0.798230 | 1.347951  |
| H         | -1.394627 | -2.608750 | -0.682441 | H         | -0.906924 | -0.270558 | 2.274704  |
| H         | -2.365231 | -0.095784 | -1.929848 | H         | -1.658958 | -1.736466 | 1.578447  |
| H         | -3.294573 | -1.258087 | -0.977803 | H         | 0.913499  | -1.589330 | 0.823521  |
| C         | -1.743282 | -0.667343 | 1.309372  | H         | -2.882019 | 0.464891  | 0.642271  |
| H         | -1.522435 | -0.160190 | 2.252347  | C         | 0.423784  | 0.423568  | 0.088461  |
| H         | -2.373403 | -1.541406 | 1.500693  | C         | -0.876799 | 1.141349  | 0.039982  |
| H         | 0.247931  | -1.689928 | 0.942419  | C         | 1.643202  | 0.932198  | -0.143356 |
| H         | -3.270234 | 0.772919  | 0.471648  | H         | 1.790135  | 1.976091  | -0.401065 |
| C         | 0.050350  | 0.353706  | 0.151650  | C         | -1.082787 | 2.437189  | -0.188935 |
| C         | -1.159526 | 1.218348  | 0.045455  | H         | -0.263073 | 3.124084  | -0.376677 |
| C         | 1.318317  | 0.734770  | -0.073347 | C         | 2.815658  | 0.116218  | -0.063269 |
| H         | 1.525295  | 1.774609  | -0.319341 | N         | 3.760502  | -0.551558 | 0.002273  |
| C         | -1.206767 | 2.535482  | -0.148188 | H         | -2.084586 | 2.853901  | -0.189131 |

|           |           |           |           |           |           |           |           |
|-----------|-----------|-----------|-----------|-----------|-----------|-----------|-----------|
|           |           |           |           | C         | 0.183506  | -1.480838 | 1.729845  |
|           |           |           |           | H         | -0.412047 | 1.030828  | 2.689350  |
| <b>7a</b> |           |           |           | H         | -0.135323 | 2.564133  | 1.689561  |
| C         | -0.239895 | 0.076519  | 0.057184  | H         | 0.135323  | -2.564133 | 1.689561  |
| C         | -1.373499 | 1.026140  | 0.123877  | H         | 0.412047  | -1.030828 | 2.689350  |
| C         | -2.689758 | 0.485908  | -0.205569 |           |           |           |           |
| C         | -2.903071 | -0.842115 | -0.296960 |           |           |           |           |
| C         | -1.814594 | -1.782682 | -0.132877 | <b>7d</b> |           |           |           |
| C         | -0.548017 | -1.342418 | 0.040680  | C         | 0.178721  | 0.104183  | -0.059991 |
| H         | -3.510926 | 1.190255  | -0.307262 | C         | 1.336048  | 1.043234  | -0.026035 |
| H         | -3.901100 | -1.222016 | -0.493545 | C         | 2.658140  | 0.481372  | 0.249142  |
| H         | -2.017949 | -2.846196 | -0.198258 | C         | 2.864373  | -0.846808 | 0.223658  |
| H         | 0.256995  | -2.066931 | 0.073719  | C         | 1.762655  | -1.752356 | -0.054947 |
| C         | 1.009748  | 0.604954  | -0.146043 | C         | 0.495974  | -1.313068 | -0.206605 |
| C         | -1.240525 | 2.315729  | 0.507185  | H         | 3.476477  | 1.177175  | 0.409740  |
| H         | 1.054506  | 1.646169  | -0.468003 | H         | 3.855861  | -1.255909 | 0.386832  |
| H         | -2.083410 | 2.996671  | 0.454278  | H         | 1.970799  | -2.815795 | -0.120928 |
| H         | -0.313799 | 2.703603  | 0.913358  | H         | -0.324748 | -1.996946 | -0.371755 |
| N         | 2.239501  | 0.043020  | 0.011373  | C         | -1.088148 | 0.573289  | 0.099060  |
| C         | 2.469427  | -1.175995 | 0.750652  | C         | 1.220556  | 2.351194  | -0.322455 |
| H         | 1.709581  | -1.274177 | 1.528163  | H         | -1.218394 | 1.628212  | 0.325309  |
| H         | 2.449910  | -2.073897 | 0.117475  | H         | 2.084868  | 3.005557  | -0.270595 |
| H         | 3.454954  | -1.119465 | 1.223989  | H         | 0.286837  | 2.790872  | -0.653652 |
| C         | 3.367763  | 0.570296  | -0.726240 | C         | -2.343964 | -0.204368 | 0.022343  |
| H         | 4.256832  | 0.589219  | -0.087610 | O         | -2.404938 | -1.401857 | -0.196242 |
| H         | 3.595116  | -0.031539 | -1.616159 | C         | -3.609006 | 0.604728  | 0.239482  |
| H         | 3.147305  | 1.589141  | -1.051096 | H         | -3.680619 | 1.404063  | -0.504808 |
|           |           |           |           | H         | -4.475435 | -0.050548 | 0.162516  |
|           |           |           |           | H         | -3.588239 | 1.079778  | 1.225371  |
| <b>7b</b> |           |           |           | <b>7e</b> |           |           |           |
| C         | 0.531673  | 0.009801  | 0.048719  | C         | -0.157021 | 0.122440  | 0.053764  |
| C         | -0.528451 | 1.045666  | 0.016502  | C         | -1.342724 | 1.025073  | 0.022210  |
| C         | -1.886554 | 0.553076  | -0.222177 | C         | -2.648491 | 0.419985  | -0.238836 |
| C         | -2.183501 | -0.757820 | -0.150316 | C         | -2.812868 | -0.913703 | -0.206205 |
| C         | -1.154216 | -1.748833 | 0.126731  | C         | -1.680700 | -1.783043 | 0.067170  |
| C         | 0.137490  | -1.382554 | 0.227443  | C         | -0.427690 | -1.304056 | 0.207376  |
| H         | -2.664001 | 1.292259  | -0.393677 | H         | -3.489188 | 1.089163  | -0.396659 |
| H         | -3.207709 | -1.091529 | -0.285105 | H         | -3.792012 | -1.354743 | -0.359815 |
| H         | -1.440056 | -2.790703 | 0.225928  | H         | -1.854663 | -2.852152 | 0.139588  |
| H         | 0.921840  | -2.113974 | 0.388633  | H         | 0.413731  | -1.963446 | 0.370547  |
| C         | 1.823095  | 0.334303  | -0.164773 | C         | 1.089409  | 0.634633  | -0.111250 |
| C         | -0.308996 | 2.355757  | 0.239609  | C         | -1.263522 | 2.337965  | 0.306986  |
| H         | 2.118718  | 1.347061  | -0.428194 | H         | 1.215361  | 1.686738  | -0.338282 |
| H         | -1.116153 | 3.074120  | 0.144523  | H         | -2.147602 | 2.965486  | 0.257126  |
| H         | 0.658522  | 2.738182  | 0.545088  | H         | -0.340190 | 2.808641  | 0.624485  |
| O         | 2.813601  | -0.586886 | -0.066253 | C         | 2.344890  | -0.126758 | -0.035782 |
| H         | 3.636797  | -0.216703 | -0.397599 | O         | 2.494766  | -1.311800 | 0.173168  |
|           |           |           |           | O         | 3.404765  | 0.689160  | -0.237565 |
| <b>7c</b> |           |           |           | H         | 4.190616  | 0.126227  | -0.174406 |
| C         | 0.007869  | 0.745490  | 0.620891  |           |           |           |           |
| C         | -0.007869 | -0.745490 | 0.620891  | <b>7f</b> |           |           |           |
| C         | -0.183506 | -1.404673 | -0.675197 | C         | 0.250167  | 0.193576  | 0.023132  |
| C         | -0.113635 | -0.719588 | -1.829859 | C         | -1.023917 | 0.958290  | -0.003226 |
| C         | 0.113635  | 0.719588  | -1.829859 | C         | -2.257510 | 0.193261  | -0.188236 |
| C         | 0.183506  | 1.404673  | -0.675197 | C         | -2.264729 | -1.149387 | -0.120940 |
| H         | -0.320394 | -2.482376 | -0.672839 | C         | -1.030122 | -1.881870 | 0.112813  |
| H         | -0.209146 | -1.234819 | -2.780152 | C         | 0.157073  | -1.250607 | 0.194899  |
| H         | 0.209146  | 1.234819  | -2.780152 | H         | -3.176999 | 0.754319  | -0.325679 |
| H         | 0.320394  | 2.482376  | -0.672839 |           |           |           |           |
| C         | -0.183506 | 1.480838  | 1.729845  |           |           |           |           |

|                    |           |           |           |                            |           |           |           |
|--------------------|-----------|-----------|-----------|----------------------------|-----------|-----------|-----------|
| H                  | -3.192593 | -1.701959 | -0.221579 | N                          | -0.930412 | 1.148133  | -0.806252 |
| H                  | -1.073861 | -2.962324 | 0.203542  | N                          | -0.009901 | 1.574545  | -0.262980 |
| H                  | 1.079360  | -1.805728 | 0.332999  | O                          | -3.845385 | -0.797450 | -0.466155 |
| C                  | 1.448020  | 0.807461  | -0.154585 | C                          | -5.136985 | -0.738232 | 0.138734  |
| C                  | -1.082691 | 2.285928  | 0.207745  | H                          | -5.623602 | -1.680131 | -0.106956 |
| H                  | 1.516429  | 1.864253  | -0.384710 | H                          | -5.046011 | -0.621131 | 1.220571  |
| H                  | -2.032370 | 2.808557  | 0.160959  | H                          | -5.705096 | 0.104948  | -0.259060 |
| H                  | -0.208257 | 2.875354  | 0.459168  | C                          | 1.730113  | -0.568033 | 0.390978  |
| C                  | 2.683541  | 0.097947  | -0.082089 | C                          | 0.466633  | -0.204946 | 1.028070  |
| N                  | 3.687043  | -0.480009 | -0.023111 | C                          | 2.883253  | 0.078271  | 0.646389  |
| <b>7ba</b>         |           |           |           | C                          | -0.693375 | -0.938211 | 0.830636  |
| C                  | -1.233002 | 0.455319  | -0.118608 | H                          | 2.874172  | 0.926045  | 1.330563  |
| C                  | -1.456369 | -0.968647 | -0.476289 | H                          | -1.507391 | -0.847319 | 1.542684  |
| C                  | -2.746013 | -1.534053 | -0.067885 | H                          | -0.643366 | -1.886804 | 0.303441  |
| C                  | -3.772456 | -0.749705 | 0.307640  | H                          | 0.512586  | 0.484891  | 1.865859  |
| C                  | -3.619637 | 0.694664  | 0.360598  | H                          | 1.702273  | -1.391493 | -0.318860 |
| C                  | -2.418371 | 1.266069  | 0.146283  | N                          | 4.146219  | -0.232114 | 0.168498  |
| H                  | -2.867578 | -2.610330 | -0.153249 | C                          | 5.039557  | 0.889648  | -0.053375 |
| H                  | -4.733881 | -1.187929 | 0.556690  | H                          | 4.971787  | 1.580700  | 0.790206  |
| H                  | -4.480150 | 1.308018  | 0.606551  | H                          | 6.069696  | 0.529535  | -0.118879 |
| H                  | -2.287345 | 2.337773  | 0.235456  | H                          | 4.804314  | 1.445578  | -0.974290 |
| C                  | -0.006407 | 1.035752  | -0.015594 | C                          | 4.228561  | -1.277455 | -0.825270 |
| C                  | -0.614179 | -1.712415 | -1.219046 | H                          | 5.278002  | -1.471605 | -1.056825 |
| H                  | -0.848631 | -2.750572 | -1.432113 | H                          | 3.786081  | -2.195478 | -0.429284 |
| H                  | 0.301475  | -1.313697 | -1.638299 | H                          | 3.702813  | -1.014297 | -1.758283 |
| O                  | 0.053815  | 2.399233  | 0.069603  | <b>TS-(3+2)-1a-product</b> |           |           |           |
| H                  | 0.903372  | 2.644699  | 0.456060  | C                          | -3.046606 | 0.066037  | 0.296529  |
| C                  | 1.316773  | 0.371435  | 0.050841  | O                          | -3.472999 | 1.124644  | 0.684821  |
| C                  | 2.390256  | 0.897944  | -0.675249 | C                          | -1.575902 | -0.288538 | 0.174966  |
| C                  | 1.541161  | -0.708943 | 0.914692  | H                          | -1.458513 | -1.354788 | 0.393385  |
| C                  | 3.661099  | 0.336732  | -0.563978 | N                          | -1.195781 | -0.115738 | -1.277682 |
| H                  | 2.219512  | 1.735545  | -1.346156 | N                          | -0.146788 | 0.511778  | -1.401614 |
| C                  | 2.807971  | -1.261496 | 1.027178  | O                          | -3.818108 | -0.942875 | -0.120554 |
| H                  | 0.708851  | -1.105727 | 1.487003  | C                          | -5.218666 | -0.662614 | -0.128049 |
| C                  | 3.871873  | -0.743074 | 0.285300  | H                          | -5.700865 | -1.566504 | -0.494550 |
| H                  | 4.483196  | 0.744965  | -1.142801 | H                          | -5.562773 | -0.421185 | 0.879650  |
| H                  | 2.973233  | -2.094967 | 1.702102  | H                          | -5.430998 | 0.182324  | -0.785813 |
| H                  | 4.861236  | -1.179137 | 0.376630  | C                          | 1.700028  | 0.020033  | 0.093582  |
| <b>MDA</b>         |           |           |           | C                          | 0.483158  | 0.875394  | -0.085898 |
| C                  | 0.327610  | 0.048808  | -0.000425 | C                          | 2.939177  | 0.534127  | 0.101101  |
| O                  | 0.305130  | 1.258792  | -0.000227 | C                          | -0.638845 | 0.632321  | 0.938981  |
| C                  | -0.841533 | -0.817774 | -0.000201 | H                          | 3.069447  | 1.605044  | -0.051062 |
| H                  | -0.828198 | -1.895025 | 0.001022  | H                          | -1.166891 | 1.556787  | 1.181945  |
| N                  | -2.003263 | -0.218234 | -0.000299 | H                          | -0.260087 | 0.185159  | 1.858135  |
| N                  | -2.991948 | 0.321471  | 0.000576  | H                          | 0.776003  | 1.927010  | -0.156138 |
| O                  | 1.452675  | -0.689763 | -0.000221 | H                          | 1.528457  | -1.047592 | 0.207224  |
| C                  | 2.656128  | 0.076704  | 0.000417  | N                          | 4.124374  | -0.135330 | 0.331891  |
| H                  | 3.468321  | -0.647827 | -0.001844 | C                          | 5.309117  | 0.387704  | -0.323353 |
| H                  | 2.704600  | 0.712817  | -0.885639 | H                          | 5.305145  | 1.478639  | -0.265530 |
| H                  | 2.706088  | 0.708715  | 0.889360  | H                          | 6.202109  | 0.021929  | 0.190054  |
| <b>TS-(3+2)-1a</b> |           |           |           | H                          | 5.371827  | 0.097384  | -1.382781 |
| C                  | -3.080352 | 0.287457  | -0.249602 | C                          | 4.057625  | -1.576683 | 0.425429  |
| O                  | -3.433387 | 1.254522  | 0.380024  | H                          | 5.045125  | -1.965625 | 0.681505  |
| C                  | -1.729992 | 0.058583  | -0.800377 | H                          | 3.359462  | -1.861474 | 1.217236  |
| H                  | -1.631898 | -0.576467 | -1.673810 | H                          | 3.724254  | -2.042911 | -0.515296 |
| <b>TS-(3+2)-1b</b> |           |           |           |                            |           |           |           |

|   |           |           |           |
|---|-----------|-----------|-----------|
| C | -2.249609 | 0.319178  | -0.107385 |
| O | -2.535766 | 1.050553  | 0.808328  |
| C | -0.948687 | 0.278832  | -0.806986 |
| H | -0.928999 | -0.065977 | -1.834912 |
| N | -0.140984 | 1.331381  | -0.551567 |
| N | 0.817966  | 1.597299  | 0.024344  |
| O | -3.044039 | -0.657627 | -0.577673 |
| C | -4.285184 | -0.794200 | 0.115538  |
| H | -4.803060 | -1.622716 | -0.363483 |
| H | -4.109364 | -1.007093 | 1.171941  |
| H | -4.868607 | 0.124912  | 0.034331  |
| C | 2.597615  | -0.610359 | -0.036115 |
| C | 1.360269  | -0.462282 | 0.729154  |
| C | 3.768264  | -0.087885 | 0.344794  |
| C | 0.199948  | -1.134200 | 0.379052  |
| H | 3.873776  | 0.489406  | 1.258844  |
| H | -0.572325 | -1.284600 | 1.126338  |
| H | 0.229816  | -1.878819 | -0.411394 |
| H | 1.446236  | -0.048605 | 1.729560  |
| H | 2.542867  | -1.174205 | -0.968747 |
| O | 4.951556  | -0.190561 | -0.311176 |
| H | 4.821076  | -0.706485 | -1.116062 |

**TS-(3+2)-1b-product**

|   |           |           |           |
|---|-----------|-----------|-----------|
| C | -2.185235 | -0.297722 | -0.139222 |
| O | -2.522305 | -1.326076 | 0.391463  |
| C | -0.746935 | 0.112809  | -0.403541 |
| H | -0.715830 | 0.672792  | -1.343648 |
| N | -0.359224 | 1.092632  | 0.677770  |
| N | 0.728413  | 0.816404  | 1.177310  |
| O | -3.034135 | 0.651636  | -0.541803 |
| C | -4.408266 | 0.391529  | -0.248178 |
| H | -4.960229 | 1.249795  | -0.625465 |
| H | -4.733859 | -0.526408 | -0.741508 |
| H | -4.549711 | 0.284031  | 0.828813  |
| C | 2.559230  | 0.104318  | -0.248590 |
| C | 1.382239  | -0.378341 | 0.542561  |
| C | 3.815563  | -0.193517 | 0.080741  |
| C | 0.261398  | -1.019979 | -0.293033 |
| H | 4.053515  | -0.816543 | 0.938652  |
| H | -0.198715 | -1.858519 | 0.233366  |
| H | 0.620778  | -1.363243 | -1.263352 |
| H | 1.728188  | -1.019101 | 1.358746  |
| H | 2.350768  | 0.734910  | -1.113539 |
| O | 4.937998  | 0.197999  | -0.562634 |
| H | 4.700345  | 0.775968  | -1.298265 |

**TS-(3+2)-1c**

|   |           |           |           |
|---|-----------|-----------|-----------|
| C | -1.759481 | 0.339529  | -0.054824 |
| O | -1.971799 | 1.017019  | 0.920143  |
| C | -0.499021 | 0.311344  | -0.828043 |
| H | -0.545419 | 0.039473  | -1.876779 |
| N | 0.348260  | 1.326003  | -0.548422 |
| N | 1.338653  | 1.548524  | -0.013962 |
| O | -2.606354 | -0.581564 | -0.542637 |
| C | -3.813560 | -0.730470 | 0.206756  |
| H | -4.379977 | -1.511710 | -0.295992 |
| H | -3.588822 | -1.016787 | 1.236127  |

|   |           |           |           |
|---|-----------|-----------|-----------|
| H | -4.372294 | 0.207258  | 0.215908  |
| C | 3.065956  | -0.667595 | -0.216156 |
| C | 1.840327  | -0.567670 | 0.577297  |
| C | 4.269408  | -0.243553 | 0.176175  |
| C | 0.671163  | -1.200508 | 0.186540  |
| H | 4.412007  | 0.221537  | 1.147480  |
| H | -0.089867 | -1.423460 | 0.927571  |
| H | 0.688589  | -1.867069 | -0.671444 |
| H | 1.943500  | -0.225932 | 1.603373  |
| H | 2.957098  | -1.126295 | -1.199895 |
| H | 5.143263  | -0.348820 | -0.456169 |

**TS-(3+2)-1c-product**

|   |           |           |           |
|---|-----------|-----------|-----------|
| C | -1.542590 | -0.237449 | -0.184569 |
| O | -1.347117 | -1.354805 | 0.227881  |
| C | -0.445820 | 0.677685  | -0.701319 |
| H | -0.862319 | 1.387561  | -1.417067 |
| N | 0.018205  | 1.457018  | 0.510787  |
| N | 1.092297  | 1.035928  | 0.933825  |
| O | -2.734424 | 0.361922  | -0.196753 |
| C | -3.799438 | -0.407996 | 0.366913  |
| H | -4.688734 | 0.213550  | 0.288035  |
| H | -3.926705 | -1.339818 | -0.187382 |
| H | -3.582210 | -0.642899 | 1.410453  |
| C | 3.106320  | 0.044076  | -0.080102 |
| C | 1.631688  | -0.110001 | 0.129907  |
| C | 4.007051  | -0.862266 | 0.281064  |
| C | 0.786125  | -0.092471 | -1.151625 |
| H | 3.712535  | -1.781768 | 0.779433  |
| H | 0.549005  | -1.099104 | -1.494202 |
| H | 1.307689  | 0.447310  | -1.946681 |
| H | 1.426389  | -1.005445 | 0.728133  |
| H | 3.417581  | 0.962400  | -0.577272 |
| H | 5.065566  | -0.718814 | 0.093621  |

**TS-(3+2)-1d**

|   |           |           |           |
|---|-----------|-----------|-----------|
| C | -3.033818 | 0.273912  | -0.194192 |
| O | -3.335599 | 1.231845  | 0.472315  |
| C | -1.713048 | 0.049965  | -0.830243 |
| H | -1.675446 | -0.549557 | -1.733456 |
| N | -0.925891 | 1.149721  | -0.862244 |
| N | 0.009361  | 1.616431  | -0.399826 |
| O | -3.811588 | -0.799827 | -0.390845 |
| C | -5.073637 | -0.749431 | 0.279839  |
| H | -5.574015 | -1.684752 | 0.038472  |
| H | -4.926396 | -0.655173 | 1.357418  |
| H | -5.655437 | 0.103619  | -0.073817 |
| C | 1.791417  | -0.462415 | 0.301221  |
| C | 0.515734  | -0.198417 | 0.935644  |
| C | 2.966257  | 0.113972  | 0.609746  |
| C | -0.597897 | -0.981288 | 0.657985  |
| H | 3.039722  | 0.856888  | 1.400801  |
| H | -1.410222 | -1.022756 | 1.377075  |
| H | -0.471548 | -1.877647 | 0.056948  |
| H | 0.504944  | 0.462539  | 1.797422  |
| H | 1.808116  | -1.195731 | -0.507132 |
| C | 4.194288  | -0.253815 | -0.131386 |
| O | 4.190320  | -1.071881 | -1.033246 |

|   |          |          |           |
|---|----------|----------|-----------|
| C | 5.468186 | 0.447500 | 0.291759  |
| H | 5.672434 | 0.248675 | 1.348623  |
| H | 6.300115 | 0.099181 | -0.318910 |
| H | 5.353488 | 1.530661 | 0.183024  |

**TS-(3+2)-1d-product**

|   |           |           |           |
|---|-----------|-----------|-----------|
| C | -2.802054 | 0.264347  | 0.236250  |
| O | -2.510511 | 1.422875  | 0.063439  |
| C | -1.785141 | -0.826834 | 0.528231  |
| H | -2.257696 | -1.636677 | 1.085343  |
| N | -1.386611 | -1.363550 | -0.827158 |
| N | -0.282969 | -0.948919 | -1.172904 |
| O | -4.039381 | -0.223063 | 0.146550  |
| C | -5.037913 | 0.733305  | -0.220381 |
| H | -5.975441 | 0.183007  | -0.257772 |
| H | -5.085973 | 1.532410  | 0.521694  |
| H | -4.803421 | 1.166354  | -1.194382 |
| C | 1.796525  | -0.352005 | -0.001693 |
| C | 0.343467  | -0.040604 | -0.154180 |
| C | 2.781243  | 0.531931  | -0.158641 |
| C | -0.493939 | -0.270925 | 1.112025  |
| H | 2.574984  | 1.561079  | -0.446099 |
| H | -0.649436 | 0.652726  | 1.668311  |
| H | -0.015610 | -1.009812 | 1.760293  |
| H | 0.203603  | 0.974318  | -0.543353 |
| H | 2.062470  | -1.371317 | 0.279561  |
| C | 4.205554  | 0.126587  | 0.049283  |
| O | 4.500522  | -0.991509 | 0.415446  |
| C | 5.248922  | 1.185194  | -0.223417 |
| H | 5.076497  | 2.054304  | 0.419586  |
| H | 6.242847  | 0.779118  | -0.041550 |
| H | 5.169201  | 1.529377  | -1.259539 |

**TS-(3+2)-1e**

|   |           |           |           |
|---|-----------|-----------|-----------|
| C | -3.018429 | 0.267320  | -0.193151 |
| O | -3.323844 | 1.209761  | 0.493238  |
| C | -1.696619 | 0.063091  | -0.834587 |
| H | -1.657220 | -0.516954 | -1.750385 |
| N | -0.915926 | 1.167948  | -0.844680 |
| N | 0.015355  | 1.632653  | -0.373026 |
| O | -3.790904 | -0.805717 | -0.411945 |
| C | -5.053067 | -0.775441 | 0.260147  |
| H | -5.549817 | -1.707021 | -0.002209 |
| H | -4.905625 | -0.705075 | 1.339503  |
| H | -5.638162 | 0.083159  | -0.074010 |
| C | 1.810786  | -0.443393 | 0.301831  |
| C | 0.528646  | -0.202314 | 0.932375  |
| C | 2.974927  | 0.136862  | 0.636999  |
| C | -0.575401 | -0.989931 | 0.631460  |
| H | 3.058397  | 0.862247  | 1.439151  |
| H | -1.389820 | -1.056316 | 1.346189  |
| H | -0.437257 | -1.871611 | 0.011542  |
| H | 0.507641  | 0.440121  | 1.807604  |
| H | 1.837470  | -1.158928 | -0.521521 |
| C | 4.194907  | -0.214973 | -0.104152 |
| O | 4.269490  | -0.995147 | -1.028351 |
| O | 5.277784  | 0.444549  | 0.362551  |
| H | 6.023693  | 0.151276  | -0.181396 |

**TS-(3+2)-1e-product**

|   |           |           |           |
|---|-----------|-----------|-----------|
| C | -2.786662 | 0.261672  | 0.229736  |
| O | -2.504437 | 1.412963  | 0.002307  |
| C | -1.759068 | -0.807408 | 0.564129  |
| H | -2.221254 | -1.595195 | 1.160167  |
| N | -1.363728 | -1.400968 | -0.767808 |
| N | -0.266576 | -0.991610 | -1.139720 |
| O | -4.020475 | -0.238474 | 0.171236  |
| C | -5.029016 | 0.692755  | -0.232040 |
| H | -5.962467 | 0.134392  | -0.237000 |
| H | -5.077755 | 1.524754  | 0.472874  |
| H | -4.804574 | 1.081994  | -1.226659 |
| C | 1.813033  | -0.323245 | -0.012446 |
| C | 0.356078  | -0.032006 | -0.167230 |
| C | 2.780784  | 0.573078  | -0.192791 |
| C | -0.469312 | -0.214856 | 1.114482  |
| H | 2.583670  | 1.595385  | -0.499723 |
| H | -0.629387 | 0.730776  | 1.631066  |
| H | 0.020109  | -0.920678 | 1.790776  |
| H | 0.204001  | 0.963615  | -0.598921 |
| H | 2.091329  | -1.332581 | 0.290638  |
| C | 4.194134  | 0.180037  | 0.025901  |
| O | 4.572838  | -0.907587 | 0.388492  |
| O | 5.036694  | 1.198405  | -0.229560 |
| H | 5.931669  | 0.862957  | -0.068761 |

**TS-(3+2)-1f**

|   |           |           |           |
|---|-----------|-----------|-----------|
| C | -2.527583 | 0.297511  | -0.129348 |
| O | -2.814950 | 1.033784  | 0.780169  |
| C | -1.213312 | 0.258142  | -0.819074 |
| H | -1.190287 | -0.066701 | -1.853916 |
| N | -0.427541 | 1.327931  | -0.556630 |
| N | 0.507518  | 1.658389  | 0.010094  |
| O | -3.310662 | -0.678314 | -0.606769 |
| C | -4.567228 | -0.813978 | 0.064308  |
| H | -5.072835 | -1.645672 | -0.421336 |
| H | -4.409279 | -1.021119 | 1.124346  |
| H | -5.148373 | 0.104430  | -0.034866 |
| C | 2.304584  | -0.533393 | 0.134697  |
| C | 1.022169  | -0.452533 | 0.804327  |
| C | 3.460143  | -0.041772 | 0.620407  |
| C | -0.086137 | -1.133293 | 0.316170  |
| H | 3.500809  | 0.465384  | 1.579276  |
| H | -0.896102 | -1.378794 | 0.995726  |
| H | 0.045791  | -1.830576 | -0.506832 |
| H | 1.006451  | -0.052616 | 1.813702  |
| H | 2.320927  | -1.030275 | -0.835206 |
| C | 4.688151  | -0.162323 | -0.099904 |
| N | 5.686175  | -0.257460 | -0.681691 |

**TS-(3+2)-1f-product**

|   |           |           |           |
|---|-----------|-----------|-----------|
| C | -2.297857 | -0.265349 | -0.185311 |
| O | -2.023353 | -1.364569 | 0.231143  |
| C | -1.258298 | 0.723717  | -0.689159 |
| H | -1.713420 | 1.418220  | -1.396086 |
| N | -0.838713 | 1.505561  | 0.532626  |
| N | 0.251277  | 1.132836  | 0.959522  |

|   |           |           |           |
|---|-----------|-----------|-----------|
| O | -3.526351 | 0.246948  | -0.215804 |
| C | -4.544873 | -0.596258 | 0.332648  |
| H | -5.473168 | -0.037200 | 0.239562  |
| H | -4.597891 | -1.533615 | -0.223991 |
| H | -4.326697 | -0.815139 | 1.379303  |
| C | 2.307392  | 0.247154  | -0.050483 |
| C | 0.843238  | 0.019971  | 0.141478  |
| C | 3.240239  | -0.639925 | 0.302514  |
| C | 0.015862  | 0.028952  | -1.151075 |
| H | 2.977685  | -1.581838 | 0.775420  |
| H | -0.166504 | -0.978752 | -1.522487 |
| H | 0.514739  | 0.617059  | -1.926025 |
| H | 0.668519  | -0.894832 | 0.718869  |
| H | 2.600526  | 1.185482  | -0.518216 |
| C | 4.637731  | -0.404918 | 0.075697  |
| N | 5.766470  | -0.226749 | -0.107422 |

**TS-(3+2)-2a**

|   |           |           |           |
|---|-----------|-----------|-----------|
| C | -2.367043 | 1.433671  | 0.099719  |
| O | -3.223966 | 1.844313  | -0.646144 |
| C | -2.355064 | 0.065798  | 0.648337  |
| H | -3.318105 | -0.420668 | 0.751247  |
| N | -1.464547 | -0.183576 | 1.633598  |
| N | -0.420742 | -0.647688 | 1.780930  |
| O | -1.257597 | 2.120693  | 0.425063  |
| C | -1.152903 | 3.403624  | -0.190620 |
| H | -0.216883 | 3.827853  | 0.168057  |
| H | -1.140136 | 3.303115  | -1.278144 |
| H | -1.997169 | 4.034350  | 0.094380  |
| C | 1.159799  | -0.215246 | -0.470961 |
| C | 2.435907  | -0.513612 | -0.163719 |
| H | 2.679075  | -1.501689 | 0.223090  |
| H | 0.892608  | 0.777856  | -0.822324 |
| N | 3.546951  | 0.301231  | -0.328059 |
| C | 3.296386  | 1.667646  | -0.724839 |
| H | 4.249634  | 2.179644  | -0.872661 |
| H | 2.746571  | 1.681154  | -1.669886 |
| H | 2.707457  | 2.222022  | 0.025445  |
| C | 4.603196  | 0.140465  | 0.653956  |
| H | 4.779507  | -0.923918 | 0.827020  |
| H | 5.527768  | 0.582168  | 0.272791  |
| H | 4.362721  | 0.611724  | 1.619788  |
| C | -1.162204 | -3.200884 | -0.041686 |
| C | -1.899937 | -2.314427 | -1.059901 |
| C | -1.192649 | -0.979511 | -0.914264 |
| C | 0.063631  | -1.170320 | -0.339369 |
| C | 0.271309  | -2.645890 | -0.044216 |
| H | -1.213416 | -4.264898 | -0.282809 |
| H | -2.981239 | -2.277209 | -0.898023 |
| H | -1.741500 | -2.695809 | -2.078107 |
| H | -1.380311 | -0.178032 | -1.624032 |
| H | 0.802272  | -2.833755 | 0.894538  |
| H | 0.863317  | -3.097140 | -0.854003 |
| H | -1.603853 | -3.064480 | 0.952384  |

**TS-(3+2)-2a-product**

|   |           |          |           |
|---|-----------|----------|-----------|
| C | -2.604993 | 1.078503 | -0.009616 |
| O | -3.728975 | 1.456350 | -0.215186 |

|   |           |           |           |
|---|-----------|-----------|-----------|
| C | -2.186802 | -0.358688 | 0.232888  |
| H | -3.103114 | -0.954410 | 0.244296  |
| N | -1.575917 | -0.441370 | 1.598972  |
| N | -0.395976 | -0.781947 | 1.563589  |
| O | -1.538868 | 1.896064  | 0.024687  |
| C | -1.834318 | 3.278058  | -0.179816 |
| H | -0.881051 | 3.799301  | -0.113796 |
| H | -2.290739 | 3.427998  | -1.160314 |
| H | -2.522727 | 3.634166  | 0.588695  |
| C | 1.206524  | 0.024199  | -0.055274 |
| C | 2.517946  | -0.255876 | -0.082374 |
| H | 2.861170  | -1.277096 | 0.072355  |
| H | 0.845292  | 1.043604  | -0.150206 |
| N | 3.549896  | 0.629587  | -0.339490 |
| C | 3.203576  | 2.029807  | -0.436307 |
| H | 4.093190  | 2.600888  | -0.709876 |
| H | 2.450388  | 2.168331  | -1.216784 |
| H | 2.800157  | 2.428948  | 0.508239  |
| C | 4.817380  | 0.354297  | 0.311337  |
| H | 5.028949  | -0.716290 | 0.257632  |
| H | 5.618440  | 0.886777  | -0.208134 |
| H | 4.827121  | 0.655881  | 1.369707  |
| C | -0.746299 | -3.214270 | -0.210640 |
| C | -1.398232 | -2.300980 | -1.255883 |
| C | -1.119259 | -0.875966 | -0.740940 |
| C | 0.138658  | -1.003440 | 0.173932  |
| C | 0.560988  | -2.479859 | 0.095424  |
| H | -0.593562 | -4.235588 | -0.566659 |
| H | -2.464187 | -2.494506 | -1.405254 |
| H | -0.899537 | -2.442365 | -2.220777 |
| H | -0.948596 | -0.166332 | -1.552330 |
| H | 1.052385  | -2.803942 | 1.016312  |
| H | 1.259490  | -2.608593 | -0.738959 |
| H | -1.367354 | -3.264688 | 0.691956  |

**TS-(3+2)-2b**

|   |           |           |           |
|---|-----------|-----------|-----------|
| C | -2.396386 | -0.238234 | 0.008653  |
| O | -3.252392 | -0.618513 | -0.753452 |
| C | -1.377783 | -1.129414 | 0.593179  |
| H | -1.653582 | -2.173296 | 0.690045  |
| N | -0.636617 | -0.628980 | 1.605085  |
| N | 0.402793  | -0.176841 | 1.803309  |
| O | -2.187478 | 1.051635  | 0.326990  |
| C | -3.090794 | 1.966654  | -0.293745 |
| H | -2.818699 | 2.951419  | 0.081143  |
| H | -2.988679 | 1.923548  | -1.380220 |
| H | -4.121359 | 1.724261  | -0.027881 |
| C | 1.338997  | 1.227742  | -0.413653 |
| C | 2.437175  | 1.917923  | -0.087071 |
| H | 3.331100  | 1.443415  | 0.305789  |
| H | 0.464879  | 1.758718  | -0.792345 |
| C | 1.800846  | -2.519489 | 0.037335  |
| C | 0.709538  | -2.417154 | -1.041824 |
| C | 0.238667  | -0.980567 | -0.902486 |
| C | 1.225328  | -0.221957 | -0.275523 |
| C | 2.407711  | -1.107823 | 0.076670  |
| H | 2.536659  | -3.299552 | -0.168909 |
| H | -0.079125 | -3.167443 | -0.934902 |

|   |           |           |           |
|---|-----------|-----------|-----------|
| H | 1.150419  | -2.554710 | -2.038657 |
| H | -0.435854 | -0.548274 | -1.636974 |
| H | 2.863635  | -0.863242 | 1.041479  |
| H | 3.185424  | -0.997025 | -0.693250 |
| H | 1.340405  | -2.745875 | 1.006310  |
| O | 2.603950  | 3.261017  | -0.196371 |
| H | 1.789113  | 3.649610  | -0.536927 |

**TS-(3+2)-2b-product**

|   |           |           |           |
|---|-----------|-----------|-----------|
| C | -2.368708 | -0.139062 | -0.050831 |
| O | -3.499884 | -0.487274 | -0.266180 |
| C | -1.198835 | -1.063601 | 0.225531  |
| H | -1.600012 | -2.080012 | 0.246165  |
| N | -0.677318 | -0.754070 | 1.595364  |
| N | 0.480828  | -0.345233 | 1.574494  |
| O | -1.974569 | 1.146337  | -0.034219 |
| C | -3.018093 | 2.094333  | -0.267383 |
| H | -2.549967 | 3.074963  | -0.207558 |
| H | -3.461177 | 1.936083  | -1.252573 |
| H | -3.796087 | 1.991747  | 0.491065  |
| C | 1.359149  | 1.203915  | -0.058527 |
| C | 2.583847  | 1.728347  | -0.086210 |
| H | 3.483754  | 1.135464  | 0.044328  |
| H | 0.485242  | 1.845253  | -0.169530 |
| C | 1.633853  | -2.563539 | -0.146366 |
| C | 0.594151  | -2.210807 | -1.216984 |
| C | -0.012950 | -0.880502 | -0.731788 |
| C | 1.069337  | -0.244899 | 0.193711  |
| C | 2.270679  | -1.204305 | 0.151630  |
| H | 2.355938  | -3.312920 | -0.477672 |
| H | -0.160782 | -2.986968 | -1.369794 |
| H | 1.100763  | -2.051047 | -2.174782 |
| H | -0.272184 | -0.215635 | -1.557611 |
| H | 2.841798  | -1.168875 | 1.082571  |
| H | 2.929522  | -0.918889 | -0.676013 |
| H | 1.139740  | -2.950620 | 0.752969  |
| O | 2.890799  | 3.033014  | -0.279646 |
| H | 2.073529  | 3.540671  | -0.356924 |

**TS-(3+2)-2c**

|   |           |           |           |
|---|-----------|-----------|-----------|
| C | -1.370683 | -0.073990 | -0.785102 |
| N | -0.651987 | 1.035602  | -1.062592 |
| N | 0.222200  | 1.663249  | -0.663134 |
| C | -2.729342 | 0.194170  | -0.266645 |
| O | -3.134315 | 1.258994  | 0.129451  |
| O | -3.422878 | -0.954738 | -0.208021 |
| C | -4.711940 | -0.836196 | 0.396057  |
| H | -5.335542 | -0.144323 | -0.173228 |
| H | -5.137849 | -1.837428 | 0.384721  |
| H | -4.619592 | -0.466678 | 1.419318  |
| H | -1.240336 | -0.885732 | -1.492225 |
| C | -0.254214 | -0.585319 | 0.999466  |
| C | 0.787194  | 0.327213  | 1.065810  |
| H | 0.701601  | 1.175199  | 1.739131  |
| C | 2.123738  | 0.020629  | 0.559202  |
| C | 3.257816  | 0.683311  | 0.825356  |
| C | 2.396690  | -1.160546 | -0.352531 |
| C | 4.457079  | 0.059688  | 0.158518  |

|   |           |           |           |
|---|-----------|-----------|-----------|
| H | 3.322540  | 1.544663  | 1.483015  |
| C | 3.812160  | -0.872141 | -0.889799 |
| H | 1.654724  | -1.255213 | -1.155271 |
| H | 2.359951  | -2.096717 | 0.221352  |
| H | 5.129915  | 0.794375  | -0.295350 |
| H | 5.055293  | -0.505361 | 0.886846  |
| H | 3.728978  | -0.333815 | -1.838580 |
| H | 4.392660  | -1.779024 | -1.073315 |
| H | -0.061556 | -1.599987 | 0.663759  |
| H | -1.095729 | -0.476874 | 1.676487  |

**TS-(3+2)-2c-product**

|   |           |           |           |
|---|-----------|-----------|-----------|
| C | -1.116052 | -0.139198 | 0.177601  |
| N | -0.783061 | -0.125589 | -1.293952 |
| N | 0.210782  | 0.557358  | -1.531477 |
| C | -2.607595 | 0.115600  | 0.306986  |
| O | -3.102839 | 1.173060  | 0.605888  |
| O | -3.306903 | -0.983607 | 0.012557  |
| C | -4.725590 | -0.812811 | 0.021597  |
| H | -5.018760 | -0.055226 | -0.707546 |
| H | -5.143077 | -1.782439 | -0.241399 |
| H | -5.063344 | -0.500764 | 1.011802  |
| H | -0.906032 | -1.156940 | 0.523628  |
| C | -0.235992 | 0.938366  | 0.791385  |
| C | 0.833752  | 1.136553  | -0.295771 |
| H | 1.052220  | 2.186994  | -0.503768 |
| C | 2.112470  | 0.393744  | -0.041113 |
| C | 3.337048  | 0.917277  | 0.021525  |
| C | 2.131705  | -1.094472 | 0.244577  |
| C | 4.379559  | -0.117537 | 0.363592  |
| H | 3.562910  | 1.970653  | -0.114827 |
| C | 3.629315  | -1.446731 | 0.125708  |
| H | 1.510291  | -1.665064 | -0.454550 |
| H | 1.745950  | -1.293305 | 1.255033  |
| H | 5.283386  | -0.031909 | -0.246917 |
| H | 4.693856  | -0.008205 | 1.410105  |
| H | 3.830699  | -1.790905 | -0.892434 |
| H | 3.936453  | -2.239302 | 0.810921  |
| H | 0.194451  | 0.638658  | 1.747582  |
| H | -0.826840 | 1.844985  | 0.936286  |

**TS-(3+2)-2d**

|   |           |           |           |
|---|-----------|-----------|-----------|
| C | -1.107654 | -1.567664 | -0.307658 |
| O | -1.619294 | -1.298075 | -1.367759 |
| C | 0.342041  | -1.512716 | -0.017023 |
| H | 0.749387  | -2.139298 | 0.771239  |
| N | 1.146954  | -1.457409 | -1.107439 |
| N | 1.943841  | -0.796464 | -1.597342 |
| O | -1.777498 | -1.863683 | 0.811924  |
| C | -3.196716 | -1.744407 | 0.698762  |
| H | -3.592831 | -1.972090 | 1.686313  |
| H | -3.460723 | -0.727048 | 0.399835  |
| H | -3.578521 | -2.447374 | -0.043828 |
| C | 0.684944  | 0.450749  | 0.677057  |
| H | 0.797279  | 0.056212  | 1.685025  |
| C | 1.867456  | 0.797640  | 0.015621  |
| H | 1.885932  | 1.597442  | -0.717141 |
| C | -2.374597 | 2.004145  | -0.941056 |



|   |           |           |           |
|---|-----------|-----------|-----------|
| C | -2.731578 | 2.087240  | 0.558339  |
| C | -1.613295 | 1.304226  | 1.200607  |
| C | -0.572725 | 1.148994  | 0.371499  |
| C | -0.849535 | 1.790455  | -0.973851 |
| H | -2.700347 | 2.878068  | -1.509004 |
| H | -3.725935 | 1.684625  | 0.780494  |
| H | -2.727943 | 3.124389  | 0.920788  |
| H | -1.637627 | 0.949477  | 2.227112  |
| H | -0.534595 | 1.156651  | -1.809209 |
| H | -0.305047 | 2.741193  | -1.056437 |
| H | -2.850803 | 1.118662  | -1.373738 |
| C | 3.131452  | 0.264859  | 0.544453  |
| O | 3.133780  | -0.667451 | 1.336995  |
| C | 4.415913  | 0.865721  | 0.019605  |
| H | 4.449981  | 1.937365  | 0.237025  |
| H | 5.269300  | 0.365747  | 0.476034  |
| H | 4.456786  | 0.751306  | -1.068464 |

**TS-(3+2)-2d-product**

|   |           |           |           |
|---|-----------|-----------|-----------|
| C | 1.132689  | -1.520064 | 0.399767  |
| O | 1.753546  | -1.299197 | 1.406937  |
| C | -0.335942 | -1.229445 | 0.183805  |
| H | -0.802920 | -2.062615 | -0.352335 |
| N | -1.054334 | -1.082944 | 1.472353  |
| N | -1.852069 | -0.145518 | 1.453305  |
| O | 1.673028  | -1.987915 | -0.733408 |
| C | 3.096385  | -2.101976 | -0.707438 |
| H | 3.382466  | -2.492096 | -1.682079 |
| H | 3.542366  | -1.118239 | -0.538551 |
| H | 3.411553  | -2.777899 | 0.089222  |
| C | -0.564602 | 0.107884  | -0.571460 |
| H | -0.742769 | -0.092338 | -1.628874 |
| C | -1.847639 | 0.561280  | 0.121565  |
| H | -1.910590 | 1.635740  | 0.319525  |
| C | 2.365188  | 2.152772  | 0.763036  |
| C | 2.534957  | 2.325994  | -0.761176 |
| C | 1.478748  | 1.397855  | -1.310153 |
| C | 0.583917  | 1.055266  | -0.380059 |
| C | 0.903719  | 1.706178  | 0.953985  |
| H | 2.620878  | 3.049788  | 1.330721  |
| H | 3.544225  | 2.077526  | -1.103825 |
| H | 2.339279  | 3.359035  | -1.079269 |
| H | 1.440291  | 1.075129  | -2.346694 |
| H | 0.784530  | 1.024520  | 1.801177  |
| H | 0.236427  | 2.563185  | 1.124570  |
| H | 3.013131  | 1.338731  | 1.103484  |
| C | -3.126285 | 0.079084  | -0.578186 |
| O | -3.067700 | -0.703563 | -1.497816 |
| C | -4.421124 | 0.591882  | -0.005428 |
| H | -4.487303 | 1.674115  | -0.155700 |
| H | -5.262645 | 0.098624  | -0.489904 |
| H | -4.435154 | 0.411170  | 1.073677  |

**TS-(3+2)-2e**

|   |          |           |          |
|---|----------|-----------|----------|
| C | 2.397953 | -1.049831 | 0.414314 |
| O | 1.746370 | -2.016766 | 0.720625 |
| C | 2.068600 | 0.349312  | 0.772531 |
| H | 2.868551 | 1.079994  | 0.823526 |

|   |           |           |           |
|---|-----------|-----------|-----------|
| N | 1.138910  | 0.446982  | 1.748094  |
| N | 0.022611  | 0.631850  | 1.919110  |
| O | 3.466343  | -1.069563 | -0.395917 |
| C | 3.791449  | -2.362920 | -0.913741 |
| H | 4.653435  | -2.213907 | -1.560547 |
| H | 4.032874  | -3.046440 | -0.097853 |
| H | 2.948607  | -2.768281 | -1.476790 |
| C | -1.455492 | -0.098297 | -0.321994 |
| C | -2.777546 | 0.017454  | -0.110859 |
| H | -3.254073 | 0.963766  | 0.121111  |
| H | -1.064776 | -1.093727 | -0.535542 |
| C | 0.422439  | 3.196627  | -0.206326 |
| C | 1.250069  | 2.328932  | -1.169539 |
| C | 0.767490  | 0.926281  | -0.842764 |
| C | -0.510385 | 0.998004  | -0.282095 |
| C | -0.917992 | 2.449101  | -0.102970 |
| H | 0.316866  | 4.229864  | -0.542704 |
| H | 2.330021  | 2.471858  | -1.073550 |
| H | 0.985147  | 2.560155  | -2.209802 |
| H | 1.065028  | 0.080921  | -1.458192 |
| H | -1.447140 | 2.639095  | 0.836036  |
| H | -1.590179 | 2.742958  | -0.921906 |
| H | 0.907612  | 3.217659  | 0.777346  |
| C | -3.633149 | -1.175360 | -0.194544 |
| O | -3.270802 | -2.299571 | -0.461314 |
| O | -4.928751 | -0.885168 | 0.062994  |
| H | -5.408517 | -1.723010 | -0.014749 |

**TS-(3+2)-2e-product**

|   |           |           |           |
|---|-----------|-----------|-----------|
| C | 2.310828  | -0.905837 | -0.200671 |
| O | 1.545938  | -1.744410 | -0.610207 |
| C | 1.923024  | 0.542234  | 0.054339  |
| H | 2.814948  | 1.171664  | -0.003934 |
| N | 1.442170  | 0.575068  | 1.477870  |
| N | 0.232389  | 0.771240  | 1.552294  |
| O | 3.580575  | -1.142938 | 0.128114  |
| C | 3.987312  | -2.509594 | 0.006852  |
| H | 5.028908  | -2.537072 | 0.319172  |
| H | 3.372329  | -3.142513 | 0.648930  |
| H | 3.882496  | -2.843844 | -1.026953 |
| C | -1.370383 | -0.200876 | 0.031901  |
| C | -2.698148 | -0.123883 | 0.108276  |
| H | -3.229105 | 0.800894  | 0.308133  |
| H | -0.905938 | -1.168658 | -0.158351 |
| C | 0.120915  | 3.270046  | -0.135676 |
| C | 0.830839  | 2.481800  | -1.245076 |
| C | 0.744420  | 1.008464  | -0.798714 |
| C | -0.435127 | 0.958609  | 0.214383  |
| C | -1.058617 | 2.360930  | 0.217007  |
| H | -0.186874 | 4.269527  | -0.449957 |
| H | 1.860333  | 2.807173  | -1.419228 |
| H | 0.284725  | 2.606529  | -2.185805 |
| H | 0.588682  | 0.321621  | -1.632066 |
| H | -1.530259 | 2.587261  | 1.176246  |
| H | -1.820524 | 2.415542  | -0.568663 |
| H | 0.778608  | 3.381377  | 0.734360  |
| C | -3.516235 | -1.346565 | -0.076280 |
| O | -3.094466 | -2.451336 | -0.317522 |

|                            |           |           |           |                            |           |           |           |
|----------------------------|-----------|-----------|-----------|----------------------------|-----------|-----------|-----------|
| O                          | -4.832070 | -1.083713 | 0.057117  | H                          | 0.455242  | 0.176385  | -1.555763 |
| H                          | -5.293020 | -1.926436 | -0.071092 | H                          | -1.888320 | 2.405346  | 1.116865  |
| <b>TS-(3+2)-2f</b>         |           |           |           | H                          | -2.137855 | 2.162420  | -0.627300 |
| C                          | 2.382349  | -0.804502 | -0.010787 | H                          | 0.378468  | 3.322462  | 0.673240  |
| O                          | 3.316966  | -0.868133 | -0.769566 | C                          | -3.620094 | -1.611418 | -0.157693 |
| C                          | 1.886646  | 0.473529  | 0.553959  | N                          | -4.230559 | -2.584526 | -0.299526 |
| H                          | 2.615895  | 1.271835  | 0.637236  | <b>TS-(3+2)-3a</b>         |           |           |           |
| N                          | 1.029223  | 0.370772  | 1.594311  | C                          | -1.540005 | 1.822053  | 0.185905  |
| N                          | -0.082782 | 0.413816  | 1.861656  | O                          | -2.166146 | 2.155283  | -0.797509 |
| O                          | 1.595144  | -1.835354 | 0.325065  | C                          | -1.776990 | 0.553071  | 0.875069  |
| C                          | 1.956428  | -3.085527 | -0.271586 | H                          | -2.816360 | 0.299387  | 1.055017  |
| H                          | 1.236847  | -3.809332 | 0.104299  | N                          | -0.942646 | 0.193649  | 1.899069  |
| H                          | 1.902511  | -3.013031 | -1.359402 | N                          | -0.117236 | -0.591577 | 2.083363  |
| H                          | 2.972210  | -3.360965 | 0.016838  | O                          | -0.508803 | 2.525077  | 0.690354  |
| C                          | -1.612897 | -0.294076 | -0.351930 | C                          | -0.120407 | 3.654075  | -0.091440 |
| C                          | -2.918405 | -0.377949 | -0.029838 | H                          | 0.700084  | 4.120684  | 0.450612  |
| H                          | -3.472967 | 0.482343  | 0.330630  | H                          | 0.208595  | 3.332590  | -1.083064 |
| H                          | -1.101650 | -1.190148 | -0.700815 | H                          | -0.955599 | 4.347472  | -0.203163 |
| C                          | -0.166683 | 3.193139  | 0.003386  | C                          | 1.442383  | -1.000569 | -0.118719 |
| C                          | 0.697906  | 2.541793  | -1.089261 | C                          | 1.618242  | 0.428034  | -0.589462 |
| C                          | 0.415261  | 1.061822  | -0.895280 | C                          | 3.032697  | 0.708786  | -1.097620 |
| C                          | -0.819696 | 0.912097  | -0.257806 | C                          | 4.067321  | 0.174675  | -0.109999 |
| C                          | -1.394397 | 2.270666  | 0.097482  | C                          | 3.940014  | -1.344212 | 0.006920  |
| H                          | -0.423191 | 4.231340  | -0.215318 | C                          | 2.505331  | -1.777193 | 0.145016  |
| H                          | 1.755496  | 2.812935  | -1.033594 | C                          | 0.079575  | -1.502808 | 0.129146  |
| H                          | 0.340578  | 2.839861  | -2.083641 | H                          | 3.175634  | 0.217649  | -2.068385 |
| H                          | 0.770165  | 0.334714  | -1.621721 | H                          | 5.081048  | 0.450468  | -0.416620 |
| H                          | -1.876862 | 2.296483  | 1.079696  | H                          | 4.386966  | -1.822755 | -0.876903 |
| H                          | -2.151232 | 2.555047  | -0.647777 | H                          | 2.330469  | -2.795736 | 0.488573  |
| H                          | 0.374773  | 3.180598  | 0.957119  | H                          | 0.034111  | -2.502921 | 0.549622  |
| C                          | -3.639211 | -1.606124 | -0.147697 | H                          | 0.894294  | 0.665597  | -1.379345 |
| N                          | -4.226908 | -2.600729 | -0.243308 | H                          | 1.381076  | 1.101139  | 0.245813  |
| <b>TS-(3+2)-2f-product</b> |           |           |           | H                          | 4.516773  | -1.708447 | 0.865160  |
| C                          | 2.358858  | -0.751928 | -0.081852 | H                          | 3.889716  | 0.629472  | 0.872594  |
| O                          | 3.519285  | -0.935976 | -0.334862 | H                          | 3.162804  | 1.784071  | -1.258657 |
| C                          | 1.716798  | 0.601757  | 0.171624  | C                          | -1.037236 | -1.030284 | -0.569928 |
| H                          | 2.516840  | 1.344682  | 0.128787  | H                          | -0.898100 | -0.266811 | -1.329410 |
| N                          | 1.171457  | 0.594739  | 1.562252  | N                          | -2.188734 | -1.787073 | -0.793561 |
| N                          | -0.051916 | 0.694780  | 1.593175  | C                          | -2.593638 | -2.704920 | 0.248482  |
| O                          | 1.442921  | -1.730130 | 0.004149  | H                          | -2.833381 | -2.185325 | 1.193715  |
| C                          | 1.950163  | -3.052909 | -0.202147 | H                          | -3.483497 | -3.245471 | -0.080725 |
| H                          | 1.097528  | -3.719329 | -0.090339 | H                          | -1.811499 | -3.439053 | 0.448715  |
| H                          | 2.382523  | -3.138947 | -1.200581 | C                          | -3.294281 | -1.065717 | -1.391349 |
| H                          | 2.717913  | -3.278208 | 0.539665  | H                          | -3.994935 | -1.776668 | -1.836561 |
| C                          | -1.536944 | -0.405061 | 0.049776  | H                          | -3.843401 | -0.445621 | -0.663330 |
| C                          | -2.871768 | -0.398238 | 0.010033  | H                          | -2.922937 | -0.397556 | -2.170651 |
| H                          | -3.450816 | 0.514927  | 0.103192  | <b>TS-(3+2)-3a-product</b> |           |           |           |
| H                          | -0.995757 | -1.345905 | -0.025538 | C                          | -1.303721 | 1.741528  | -0.160303 |
| C                          | -0.261390 | 3.141874  | -0.198604 | O                          | -1.473798 | 1.981301  | -1.331701 |
| C                          | 0.504603  | 2.359411  | -1.272745 | C                          | -1.659813 | 0.402139  | 0.454665  |
| C                          | 0.525343  | 0.909786  | -0.749953 | H                          | -2.753064 | 0.395788  | 0.542388  |
| C                          | -0.681329 | 0.814033  | 0.229671  | N                          | -1.098410 | 0.226836  | 1.822069  |
| C                          | -1.388865 | 2.175381  | 0.172659  | N                          | -0.242367 | -0.659770 | 1.860985  |
| H                          | -0.625550 | 4.109308  | -0.549923 | O                          | -0.784994 | 2.606130  | 0.712331  |
| H                          | 1.507925  | 2.747566  | -1.466922 | C                          | -0.392034 | 3.859090  | 0.148568  |
| H                          | -0.050904 | 2.397063  | -2.215588 | H                          | -0.013198 | 4.450470  | 0.979317  |

|   |           |           |           |
|---|-----------|-----------|-----------|
| H | 0.386081  | 3.703734  | -0.603005 |
| H | -1.245508 | 4.349781  | -0.322391 |
| C | 1.414310  | -0.909262 | 0.093125  |
| C | 1.683643  | 0.548617  | -0.204516 |
| C | 3.067197  | 0.776905  | -0.819975 |
| C | 4.128646  | -0.053486 | -0.102463 |
| C | 3.818054  | -1.541927 | -0.260460 |
| C | 2.373923  | -1.837503 | 0.044432  |
| C | 0.015644  | -1.286751 | 0.523071  |
| H | 3.042877  | 0.484102  | -1.877016 |
| H | 5.126371  | 0.170841  | -0.491305 |
| H | 4.053806  | -1.869637 | -1.282700 |
| H | 2.113543  | -2.872369 | 0.260055  |
| H | -0.030525 | -2.371532 | 0.655253  |
| H | 0.924065  | 0.931069  | -0.898926 |
| H | 1.570480  | 1.127772  | 0.723299  |
| H | 4.454739  | -2.139591 | 0.401113  |
| H | 4.128670  | 0.203567  | 0.963826  |
| H | 3.314812  | 1.842381  | -0.789677 |
| C | -1.135258 | -0.796389 | -0.371210 |
| H | -0.771406 | -0.453517 | -1.342743 |
| N | -2.114479 | -1.843244 | -0.624975 |
| C | -2.782634 | -2.342930 | 0.565913  |
| H | -3.451290 | -1.602557 | 1.041110  |
| H | -3.391136 | -3.208641 | 0.291962  |
| H | -2.055290 | -2.666428 | 1.314261  |
| C | -3.082612 | -1.433906 | -1.628678 |
| H | -3.724889 | -2.283000 | -1.877482 |
| H | -3.731459 | -0.602805 | -1.297529 |
| H | -2.562621 | -1.112360 | -2.534417 |

**TS-(3+2)-3b**

|   |           |           |           |
|---|-----------|-----------|-----------|
| C | 2.787460  | -0.813127 | 0.142818  |
| O | 3.398694  | -1.574960 | -0.563964 |
| C | 1.346336  | -0.948615 | 0.426366  |
| H | 0.949623  | -1.956788 | 0.363666  |
| N | 0.842978  | -0.218190 | 1.460273  |
| N | 0.154455  | 0.691528  | 1.623376  |
| O | 3.300735  | 0.317034  | 0.664994  |
| C | 4.638503  | 0.593229  | 0.245847  |
| H | 4.927500  | 1.509467  | 0.757537  |
| H | 5.302361  | -0.227819 | 0.521328  |
| H | 4.665635  | 0.725032  | -0.838173 |
| C | -1.828384 | 0.488008  | -0.307240 |
| C | -2.019515 | -1.012831 | -0.391208 |
| C | -3.491408 | -1.410493 | -0.508549 |
| C | -4.332266 | -0.653112 | 0.516331  |
| C | -4.264805 | 0.848519  | 0.238172  |
| C | -2.855982 | 1.305113  | -0.026308 |
| C | -0.471121 | 1.024719  | -0.471663 |
| H | -3.850400 | -1.168107 | -1.516544 |
| H | -5.370539 | -0.997951 | 0.501122  |
| H | -4.900673 | 1.095311  | -0.624577 |
| H | -2.667016 | 2.376401  | 0.023058  |
| H | -0.360618 | 2.100933  | -0.355051 |
| H | -1.461477 | -1.419998 | -1.242227 |
| H | -1.583545 | -1.475606 | 0.507724  |
| H | -4.678692 | 1.411119  | 1.082984  |

|   |           |           |           |
|---|-----------|-----------|-----------|
| H | -3.938607 | -0.853781 | 1.520702  |
| H | -3.596088 | -2.492230 | -0.381134 |
| C | 0.548194  | 0.357867  | -1.143136 |
| H | 0.367401  | -0.503305 | -1.775774 |
| O | 1.678741  | 1.025825  | -1.543277 |
| H | 1.845679  | 1.745117  | -0.920802 |

**TS-(3+2)-3b-product**

|   |           |           |           |
|---|-----------|-----------|-----------|
| C | -2.826284 | 0.710580  | -0.203993 |
| O | -3.441718 | 1.517676  | -0.846796 |
| C | -1.324697 | 0.710402  | -0.006959 |
| H | -0.968939 | 1.712174  | -0.258954 |
| N | -0.988289 | 0.461358  | 1.429067  |
| N | -0.091468 | -0.373056 | 1.560642  |
| O | -3.391315 | -0.338733 | 0.422289  |
| C | -4.811487 | -0.430858 | 0.270208  |
| H | -5.116334 | -1.300998 | 0.847708  |
| H | -5.286895 | 0.473355  | 0.653050  |
| H | -5.069428 | -0.551436 | -0.783646 |
| C | 1.843142  | -0.411339 | 0.072297  |
| C | 2.068889  | 1.083835  | 0.066443  |
| C | 3.461734  | 1.457524  | -0.444526 |
| C | 4.524091  | 0.563023  | 0.191541  |
| C | 4.290259  | -0.895364 | -0.204415 |
| C | 2.843755  | -1.285877 | -0.060998 |
| C | 0.424298  | -0.889536 | 0.256324  |
| H | 3.492731  | 1.329703  | -1.533795 |
| H | 5.528007  | 0.880376  | -0.105185 |
| H | 4.609272  | -1.060194 | -1.243106 |
| H | 2.614633  | -2.350221 | -0.057510 |
| H | 0.410103  | -1.983061 | 0.301475  |
| H | 1.308166  | 1.573237  | -0.556116 |
| H | 1.917793  | 1.469042  | 1.084327  |
| H | 4.906799  | -1.562657 | 0.407869  |
| H | 4.464062  | 0.655159  | 1.282850  |
| H | 3.663611  | 2.512665  | -0.238784 |
| C | -0.595113 | -0.400021 | -0.795100 |
| H | -0.102556 | 0.000256  | -1.682986 |
| O | -1.441342 | -1.427811 | -1.247579 |
| H | -2.009248 | -1.698791 | -0.513399 |

**TS-(3+2)-3c**

|   |           |           |           |
|---|-----------|-----------|-----------|
| C | 3.049820  | -0.143284 | -0.322678 |
| O | 3.474702  | -1.259096 | -0.150847 |
| C | 1.675331  | 0.202896  | -0.741040 |
| H | 1.517682  | 1.134529  | -1.273471 |
| N | 0.951023  | -0.838254 | -1.206190 |
| N | 0.079273  | -1.524809 | -0.909187 |
| O | 3.737017  | 0.981767  | -0.062714 |
| C | 5.043872  | 0.765425  | 0.471399  |
| H | 5.462701  | 1.755378  | 0.640664  |
| H | 4.984356  | 0.205587  | 1.406953  |
| H | 5.655164  | 0.203099  | -0.236984 |
| C | -1.813585 | -0.144786 | 0.606090  |
| C | -1.979068 | 1.157878  | -0.146060 |
| C | -3.444789 | 1.561222  | -0.318031 |
| C | -4.289444 | 0.363691  | -0.746230 |
| C | -4.256409 | -0.709325 | 0.341853  |

|   |           |           |           |
|---|-----------|-----------|-----------|
| C | -2.854511 | -0.962740 | 0.825509  |
| C | -0.458679 | -0.529727 | 1.037920  |
| H | -3.826434 | 1.941304  | 0.637981  |
| H | -5.320143 | 0.667292  | -0.953474 |
| H | -4.892423 | -0.403104 | 1.185301  |
| H | -2.679085 | -1.886668 | 1.374686  |
| H | -0.379151 | -1.494184 | 1.532654  |
| H | -1.442242 | 1.959368  | 0.373675  |
| H | -1.496810 | 1.060369  | -1.131315 |
| H | -4.687599 | -1.645070 | -0.032004 |
| H | -3.879530 | -0.051533 | -1.675477 |
| H | -3.524400 | 2.378221  | -1.041803 |
| C | 0.608272  | 0.347880  | 1.143063  |
| H | 0.463456  | 1.417534  | 1.036365  |
| H | 1.453784  | 0.063166  | 1.761607  |

**TS-(3+2)-3c-product**

|   |           |           |           |
|---|-----------|-----------|-----------|
| C | 2.976534  | -0.125032 | 0.313595  |
| O | 3.370925  | -1.235877 | 0.565291  |
| C | 1.513625  | 0.282566  | 0.236515  |
| H | 1.422823  | 1.304621  | 0.616682  |
| N | 1.159810  | 0.349754  | -1.228181 |
| N | 0.169703  | -0.326242 | -1.495831 |
| O | 3.774840  | 0.907359  | 0.029732  |
| C | 5.168730  | 0.595202  | -0.009502 |
| H | 5.674439  | 1.525786  | -0.258353 |
| H | 5.500677  | 0.220849  | 0.960904  |
| H | 5.363592  | -0.165316 | -0.767876 |
| C | -1.826121 | -0.439477 | -0.102157 |
| C | -1.935379 | 1.062142  | 0.031424  |
| C | -3.281565 | 1.490628  | 0.616293  |
| C | -4.422199 | 0.751431  | -0.082344 |
| C | -4.302411 | -0.755449 | 0.152325  |
| C | -2.891007 | -1.242370 | -0.041601 |
| C | -0.438573 | -0.997762 | -0.306034 |
| H | -3.303424 | 1.253415  | 1.687530  |
| H | -5.393397 | 1.112917  | 0.268411  |
| H | -4.633883 | -1.005653 | 1.169984  |
| H | -2.745309 | -2.317315 | -0.138092 |
| H | -0.510779 | -2.060599 | -0.554185 |
| H | -1.114721 | 1.440544  | 0.656176  |
| H | -1.787924 | 1.514157  | -0.958789 |
| H | -4.971023 | -1.301565 | -0.522418 |
| H | -4.371180 | 0.954213  | -1.159093 |
| H | -3.403988 | 2.573755  | 0.523536  |
| C | 0.549539  | -0.725493 | 0.846623  |
| H | 0.043260  | -0.333231 | 1.729838  |
| H | 1.091091  | -1.631337 | 1.122812  |

**TS-(3+2)-3d**

|   |           |          |           |
|---|-----------|----------|-----------|
| C | 0.745251  | 1.756452 | -0.471824 |
| O | 1.360652  | 1.471385 | -1.471372 |
| C | -0.690103 | 1.496811 | -0.235979 |
| H | -1.235332 | 2.128905 | 0.460215  |
| N | -1.431708 | 1.197186 | -1.332588 |
| N | -2.156096 | 0.400126 | -1.723102 |
| O | 1.288514  | 2.276891 | 0.635716  |
| C | 2.709617  | 2.410663 | 0.591004  |

|   |           |           |           |
|---|-----------|-----------|-----------|
| H | 3.003571  | 2.781948  | 1.570792  |
| H | 3.170186  | 1.441098  | 0.388504  |
| H | 2.999737  | 3.113721  | -0.192177 |
| C | -0.805352 | -0.384415 | 0.702280  |
| H | -0.926497 | 0.138178  | 1.650140  |
| C | -1.977316 | -0.905804 | 0.143932  |
| H | -1.976676 | -1.810594 | -0.451497 |
| C | 0.526297  | -0.986088 | 0.459044  |
| C | 0.753829  | -1.708778 | -0.850419 |
| C | 1.509002  | -0.810072 | 1.355906  |
| C | 2.096825  | -2.440965 | -0.895128 |
| H | -0.057416 | -2.423330 | -1.026342 |
| H | 0.698473  | -0.971575 | -1.663292 |
| C | 2.922143  | -1.289232 | 1.159016  |
| H | 1.283443  | -0.273587 | 2.276773  |
| C | 3.207817  | -1.567027 | -0.316899 |
| H | 2.028478  | -3.364970 | -0.306964 |
| H | 2.324025  | -2.732449 | -1.924600 |
| H | 3.091908  | -2.199711 | 1.751340  |
| H | 3.620132  | -0.543793 | 1.559112  |
| H | 4.184707  | -2.045478 | -0.434111 |
| H | 3.233140  | -0.617933 | -0.868612 |
| C | -3.257337 | -0.362152 | 0.615365  |
| O | -3.301397 | 0.686896  | 1.246118  |
| C | -4.515971 | -1.108035 | 0.231852  |
| H | -4.483562 | -2.131057 | 0.618124  |
| H | -5.386796 | -0.587636 | 0.628594  |
| H | -4.587270 | -1.172439 | -0.858754 |

**TS-(3+2)-3d-product**

|   |           |           |           |
|---|-----------|-----------|-----------|
| C | -0.709673 | 1.757531  | 0.551578  |
| O | -1.381247 | 1.591934  | 1.536397  |
| C | 0.684506  | 1.221825  | 0.320112  |
| H | 1.303742  | 2.004578  | -0.132407 |
| N | 1.351135  | 0.819431  | 1.582847  |
| N | 2.021610  | -0.204101 | 1.438395  |
| O | -1.131563 | 2.396722  | -0.549030 |
| C | -2.508143 | 2.774840  | -0.523888 |
| H | -2.696605 | 3.279419  | -1.469376 |
| H | -3.134670 | 1.883841  | -0.429428 |
| H | -2.707260 | 3.440370  | 0.317791  |
| C | 0.699651  | -0.051492 | -0.565251 |
| H | 0.868025  | 0.231987  | -1.605244 |
| C | 1.937068  | -0.721139 | 0.021619  |
| H | 1.900683  | -1.813702 | 0.066076  |
| C | -0.577234 | -0.850510 | -0.422865 |
| C | -0.841067 | -1.552403 | 0.893410  |
| C | -1.479134 | -0.828573 | -1.411069 |
| C | -2.064482 | -2.468205 | 0.825351  |
| H | 0.040444  | -2.132387 | 1.193918  |
| H | -0.979921 | -0.796442 | 1.677744  |
| C | -2.847142 | -1.451092 | -1.319580 |
| H | -1.229795 | -0.306242 | -2.334054 |
| C | -3.223075 | -1.755670 | 0.130576  |
| H | -1.813722 | -3.376118 | 0.261906  |
| H | -2.346449 | -2.782966 | 1.834097  |
| H | -2.875155 | -2.372165 | -1.918658 |
| H | -3.581127 | -0.776340 | -1.775530 |

|   |           |           |           |
|---|-----------|-----------|-----------|
| H | -4.136000 | -2.357155 | 0.170231  |
| H | -3.425602 | -0.814111 | 0.657418  |
| C | 3.248031  | -0.273190 | -0.639085 |
| O | 3.257720  | 0.620231  | -1.454120 |
| C | 4.493950  | -0.972956 | -0.162637 |
| H | 4.455607  | -2.028733 | -0.449136 |
| H | 5.373750  | -0.502688 | -0.599698 |
| H | 4.536042  | -0.933362 | 0.930057  |

**TS-(3+2)-3e**

|   |           |           |           |
|---|-----------|-----------|-----------|
| C | 0.731675  | 1.764212  | -0.461044 |
| O | 1.355109  | 1.485791  | -1.457226 |
| C | -0.704625 | 1.498775  | -0.236491 |
| H | -1.251686 | 2.132415  | 0.456662  |
| N | -1.438936 | 1.201531  | -1.339133 |
| N | -2.153705 | 0.397545  | -1.734295 |
| O | 1.264809  | 2.281428  | 0.653008  |
| C | 2.685678  | 2.422364  | 0.618783  |
| H | 2.971192  | 2.788772  | 1.602880  |
| H | 3.152400  | 1.456479  | 0.413082  |
| H | 2.977440  | 3.131930  | -0.157884 |
| C | -0.825989 | -0.398548 | 0.681744  |
| H | -0.961884 | 0.108739  | 1.635316  |
| C | -1.979902 | -0.926058 | 0.094366  |
| H | -1.980484 | -1.825746 | -0.504553 |
| C | 0.513016  | -0.987228 | 0.446518  |
| C | 0.757683  | -1.699472 | -0.865449 |
| C | 1.484837  | -0.810446 | 1.354741  |
| C | 2.106369  | -2.421599 | -0.901628 |
| H | -0.046355 | -2.419025 | -1.053075 |
| H | 0.704524  | -0.957688 | -1.674246 |
| C | 2.903208  | -1.278050 | 1.168343  |
| H | 1.246304  | -0.282781 | 2.277459  |
| C | 3.205309  | -1.543742 | -0.306548 |
| H | 2.038631  | -3.350084 | -0.320610 |
| H | 2.345538  | -2.704248 | -1.930789 |
| H | 3.073328  | -2.191351 | 1.756128  |
| H | 3.591762  | -0.530476 | 1.580598  |
| H | 4.186657  | -2.014525 | -0.417121 |
| H | 3.229355  | -0.590830 | -0.851682 |
| C | -3.260850 | -0.420568 | 0.584436  |
| O | -3.397730 | 0.611087  | 1.217301  |
| O | -4.312948 | -1.180171 | 0.221500  |
| H | -5.100616 | -0.728044 | 0.558539  |

**TS-(3+2)-3e-product**

|   |           |           |           |
|---|-----------|-----------|-----------|
| C | -0.686597 | 1.768593  | 0.527608  |
| O | -1.378047 | 1.625050  | 1.501866  |
| C | 0.706993  | 1.217300  | 0.330565  |
| H | 1.345537  | 1.985934  | -0.117606 |
| N | 1.342446  | 0.818579  | 1.608266  |
| N | 2.007576  | -0.210878 | 1.493492  |
| O | -1.081513 | 2.393297  | -0.591357 |
| C | -2.454548 | 2.785326  | -0.597932 |
| H | -2.620393 | 3.276613  | -1.554591 |
| H | -3.091650 | 1.902092  | -0.501031 |
| H | -2.662309 | 3.466075  | 0.229300  |
| C | 0.723884  | -0.067663 | -0.539669 |

|   |           |           |           |
|---|-----------|-----------|-----------|
| H | 0.905935  | 0.201172  | -1.581375 |
| C | 1.941355  | -0.751602 | 0.078915  |
| H | 1.901060  | -1.840651 | 0.130198  |
| C | -0.562478 | -0.852945 | -0.407008 |
| C | -0.852386 | -1.534914 | 0.914151  |
| C | -1.448646 | -0.834323 | -1.409315 |
| C | -2.083174 | -2.440122 | 0.838216  |
| H | 0.018624  | -2.119050 | 1.236112  |
| H | -0.996631 | -0.767321 | 1.686106  |
| C | -2.823809 | -1.442412 | -1.330779 |
| H | -1.180606 | -0.326010 | -2.334964 |
| C | -3.224324 | -1.725522 | 0.117194  |
| H | -1.832123 | -3.357267 | 0.290204  |
| H | -2.383126 | -2.739411 | 1.846390  |
| H | -2.851269 | -2.370410 | -1.919015 |
| H | -3.544059 | -0.766308 | -1.806194 |
| H | -4.143259 | -2.318115 | 0.150027  |
| H | -3.426175 | -0.775705 | 0.629229  |
| C | 3.240405  | -0.318315 | -0.574967 |
| O | 3.383085  | 0.709207  | -1.190337 |
| O | 4.228464  | -1.191073 | -0.349775 |
| H | 5.034330  | -0.817793 | -0.740145 |

**TS-(3+2)-3f**

|   |           |           |           |
|---|-----------|-----------|-----------|
| C | 1.925955  | 1.184449  | 0.571877  |
| O | 3.098195  | 0.916235  | 0.522520  |
| C | 0.858243  | 0.296607  | 1.099165  |
| H | 0.001817  | 0.756005  | 1.582727  |
| N | 1.323518  | -0.820587 | 1.707391  |
| N | 1.436981  | -1.947699 | 1.534723  |
| O | 1.366510  | 2.295473  | 0.069918  |
| C | 2.288074  | 3.177877  | -0.578900 |
| H | 1.691463  | 4.011541  | -0.943085 |
| H | 3.042959  | 3.522199  | 0.130102  |
| H | 2.785135  | 2.664886  | -1.404310 |
| C | 0.065818  | -0.644310 | -0.619225 |
| H | 0.610731  | 0.001972  | -1.305238 |
| C | 0.523577  | -1.963516 | -0.516648 |
| H | -0.137611 | -2.773353 | -0.235353 |
| C | -1.358656 | -0.274503 | -0.429152 |
| C | -2.206256 | -1.132776 | 0.481786  |
| C | -1.839180 | 0.831425  | -1.013958 |
| C | -3.694245 | -0.783543 | 0.401256  |
| H | -2.069920 | -2.190348 | 0.231966  |
| H | -1.845807 | -1.023213 | 1.516996  |
| C | -3.237207 | 1.351655  | -0.819130 |
| H | -1.177753 | 1.408112  | -1.658798 |
| C | -3.900353 | 0.729266  | 0.409628  |
| H | -4.107178 | -1.192995 | -0.528736 |
| H | -4.231834 | -1.258971 | 1.226679  |
| H | -3.836742 | 1.140369  | -1.715741 |
| H | -3.208294 | 2.443243  | -0.729085 |
| H | -4.965392 | 0.977055  | 0.435308  |
| H | -3.448814 | 1.150533  | 1.317191  |
| C | 1.726587  | -2.345280 | -1.190243 |
| N | 2.705995  | -2.645257 | -1.733379 |

**TS-(3+2)-3f-product**

|   |           |           |           |
|---|-----------|-----------|-----------|
| C | 2.165961  | 0.853211  | -0.278621 |
| O | 2.537716  | 0.299013  | -1.280989 |
| C | 0.834330  | 0.577247  | 0.413471  |
| H | 0.374741  | 1.532723  | 0.679030  |
| N | 1.153086  | -0.140474 | 1.689480  |
| N | 0.850997  | -1.330405 | 1.646644  |
| O | 2.866976  | 1.768654  | 0.388463  |
| C | 4.165534  | 2.040505  | -0.149771 |
| H | 4.608531  | 2.783043  | 0.510023  |
| H | 4.763634  | 1.127885  | -0.165257 |
| H | 4.078200  | 2.426611  | -1.166980 |
| C | -0.073709 | -0.366466 | -0.383821 |
| H | 0.252366  | -0.401245 | -1.424570 |
| C | 0.231439  | -1.707009 | 0.324736  |
| H | -0.669255 | -2.291272 | 0.536626  |
| C | -1.532770 | 0.007268  | -0.289813 |
| C | -2.136550 | 0.123425  | 1.094182  |
| C | -2.246579 | 0.229607  | -1.397430 |
| C | -3.665531 | 0.158551  | 1.055684  |
| H | -1.798873 | -0.707983 | 1.726639  |
| H | -1.755500 | 1.031409  | 1.584442  |
| C | -3.691727 | 0.649652  | -1.402320 |
| H | -1.762404 | 0.108656  | -2.365417 |
| C | -4.151217 | 1.124535  | -0.023241 |
| H | -4.043155 | -0.847103 | 0.832630  |
| H | -4.056751 | 0.438174  | 2.037921  |
| H | -4.310083 | -0.195508 | -1.735404 |
| H | -3.837577 | 1.438296  | -2.148740 |
| H | -5.240510 | 1.220007  | 0.001104  |
| H | -3.735667 | 2.120557  | 0.174293  |
| C | 1.176521  | -2.568381 | -0.392848 |
| N | 1.915997  | -3.251757 | -0.958607 |

**TS-(3+2)-4a**

|   |           |           |           |
|---|-----------|-----------|-----------|
| C | 2.398677  | -0.666141 | 0.497372  |
| O | 2.896280  | -0.067496 | 1.425972  |
| C | 0.984473  | -1.008852 | 0.330510  |
| H | 0.745975  | -1.880232 | -0.272279 |
| N | 0.205414  | -0.952342 | 1.453107  |
| N | -0.880582 | -0.641533 | 1.695807  |
| O | 3.096981  | -1.050039 | -0.594408 |
| C | 4.467176  | -0.658562 | -0.584885 |
| H | 4.893621  | -1.042315 | -1.509979 |
| H | 4.554199  | 0.430691  | -0.545029 |
| H | 4.980811  | -1.079901 | 0.281297  |
| C | -2.589816 | 1.142831  | 0.409112  |
| C | -3.707359 | -0.961375 | -0.026469 |
| C | -3.952708 | 0.553106  | -0.003806 |
| H | -4.210386 | 0.893314  | -1.012037 |
| H | -4.760383 | 0.849130  | 0.669645  |
| H | -2.427340 | 2.146115  | 0.002198  |
| H | -4.441177 | -1.523604 | -0.608271 |
| C | -1.581286 | 0.145434  | -0.154330 |
| C | -2.305560 | -1.071604 | -0.587472 |
| C | -0.381567 | 0.517736  | -0.779273 |
| H | -0.098847 | 0.014077  | -1.700657 |
| C | -1.855801 | -2.085012 | -1.335817 |
| H | -0.848055 | -2.113378 | -1.738717 |

|   |           |           |           |
|---|-----------|-----------|-----------|
| N | 0.206540  | 1.755086  | -0.601762 |
| C | 0.381117  | 2.228240  | 0.766649  |
| H | -0.533700 | 2.092522  | 1.342698  |
| H | 1.195670  | 1.687724  | 1.271278  |
| H | 0.621012  | 3.294095  | 0.746113  |
| C | 1.373127  | 2.006987  | -1.427586 |
| H | 1.625048  | 3.068944  | -1.383993 |
| H | 2.247299  | 1.426286  | -1.092314 |
| H | 1.157588  | 1.745721  | -2.465382 |
| H | -2.505248 | -2.914279 | -1.594087 |
| H | -3.714780 | -1.351380 | 1.000090  |
| H | -2.529849 | 1.211530  | 1.502815  |

**TS-(3+2)-4a-product**

|   |           |           |           |
|---|-----------|-----------|-----------|
| C | 2.230248  | -0.561360 | 0.509961  |
| O | 2.828885  | 0.008030  | 1.384263  |
| C | 0.738166  | -0.777073 | 0.420762  |
| H | 0.584584  | -1.816137 | 0.108886  |
| N | 0.052436  | -0.643247 | 1.727476  |
| N | -1.103657 | -0.243920 | 1.578593  |
| O | 2.824060  | -1.097068 | -0.573006 |
| C | 4.238299  | -0.910108 | -0.631127 |
| H | 4.567577  | -1.403645 | -1.543352 |
| H | 4.479859  | 0.155526  | -0.661085 |
| H | 4.716362  | -1.353116 | 0.244396  |
| C | -2.414215 | 1.236337  | 0.055900  |
| C | -3.709939 | -0.811409 | -0.000679 |
| C | -3.776954 | 0.670327  | -0.394237 |
| H | -3.879145 | 0.750172  | -1.481040 |
| H | -4.617397 | 1.198746  | 0.060702  |
| H | -2.024936 | 2.004621  | -0.614685 |
| H | -4.431893 | -1.447791 | -0.516848 |
| C | -1.439392 | 0.038199  | 0.126925  |
| C | -2.282329 | -1.147584 | -0.343457 |
| C | -0.050408 | 0.165014  | -0.535542 |
| H | -0.068826 | -0.249944 | -1.545888 |
| C | -1.880373 | -2.211073 | -1.034013 |
| H | -0.851085 | -2.369358 | -1.338775 |
| N | 0.404233  | 1.534628  | -0.635168 |
| C | 0.552128  | 2.257353  | 0.623992  |
| H | -0.384419 | 2.244958  | 1.184867  |
| H | 1.342483  | 1.855232  | 1.273257  |
| H | 0.789510  | 3.299442  | 0.392008  |
| C | 1.545757  | 1.737120  | -1.511727 |
| H | 1.599388  | 2.795778  | -1.783816 |
| H | 2.512624  | 1.464136  | -1.058177 |
| H | 1.419417  | 1.152936  | -2.426927 |
| H | -2.595630 | -2.968197 | -1.339670 |
| H | -3.860251 | -0.915324 | 1.081280  |
| H | -2.498796 | 1.667577  | 1.057943  |

**TS-(3+2)-4b**

|   |           |           |          |
|---|-----------|-----------|----------|
| C | -2.701647 | -0.151275 | 0.323355 |
| O | -2.930378 | 0.903588  | 0.862181 |
| C | -1.468373 | -0.949223 | 0.478865 |
| H | -1.518104 | -2.019846 | 0.315955 |
| N | -0.685496 | -0.561663 | 1.506875 |
| N | 0.279144  | 0.022843  | 1.723828 |

|   |           |           |           |
|---|-----------|-----------|-----------|
| O | -3.500208 | -0.727147 | -0.591921 |
| C | -4.666926 | 0.030004  | -0.915717 |
| H | -5.197249 | -0.549391 | -1.668873 |
| H | -5.287282 | 0.170151  | -0.028448 |
| H | -4.387675 | 1.010060  | -1.307880 |
| C | 3.256474  | 0.804687  | 0.126238  |
| C | 1.141311  | 1.946890  | -0.188042 |
| C | 2.654125  | 2.108195  | -0.423950 |
| H | 2.852304  | 2.172107  | -1.499154 |
| H | 3.064485  | 3.003513  | 0.049111  |
| H | 4.241575  | 0.564309  | -0.279922 |
| H | 0.535742  | 2.549553  | -0.870173 |
| C | 2.216899  | -0.230372 | -0.234570 |
| C | 0.909754  | 0.450468  | -0.390334 |
| C | 2.453216  | -1.534425 | -0.374569 |
| H | 1.668010  | -2.245504 | -0.627271 |
| C | -0.178537 | -0.078921 | -1.061067 |
| H | -0.082328 | -1.020963 | -1.593255 |
| H | -0.930804 | 0.596672  | -1.458364 |
| H | 0.892434  | 2.257134  | 0.833180  |
| H | 3.353931  | 0.864981  | 1.218357  |
| O | 3.708008  | -2.049972 | -0.180120 |
| H | 3.722273  | -2.968957 | -0.460558 |

**TS-(3+2)-4b-product**

|   |           |           |           |
|---|-----------|-----------|-----------|
| C | -2.494925 | -0.007848 | -0.310087 |
| O | -2.481312 | 1.198963  | -0.296046 |
| C | -1.270102 | -0.887140 | -0.501788 |
| H | -1.572094 | -1.794757 | -1.028641 |
| N | -0.839852 | -1.300199 | 0.886952  |
| N | 0.222630  | -0.771238 | 1.208790  |
| O | -3.592042 | -0.743711 | -0.118305 |
| C | -4.777435 | 0.004706  | 0.160185  |
| H | -5.567313 | -0.730795 | 0.296901  |
| H | -4.642958 | 0.600632  | 1.064749  |
| H | -5.008434 | 0.671770  | -0.672599 |
| C | 3.019102  | 1.220279  | -0.034858 |
| C | 0.734417  | 1.583445  | 0.656931  |
| C | 1.887546  | 2.260809  | -0.092636 |
| H | 1.595992  | 2.439249  | -1.134091 |
| H | 2.165405  | 3.223534  | 0.341818  |
| H | 3.722408  | 1.293176  | -0.868946 |
| H | -0.248362 | 2.026761  | 0.481599  |
| C | 2.282909  | -0.100376 | -0.015448 |
| C | 0.795357  | 0.123828  | 0.161538  |
| C | 2.838525  | -1.305031 | -0.089320 |
| H | 2.246314  | -2.216902 | -0.026198 |
| C | -0.071644 | -0.154452 | -1.086323 |
| H | 0.466915  | -0.791548 | -1.789744 |
| H | -0.364850 | 0.768757  | -1.589579 |
| H | 0.936408  | 1.584358  | 1.734102  |
| H | 3.603327  | 1.334441  | 0.886617  |
| O | 4.186701  | -1.449779 | -0.242392 |
| H | 4.418526  | -2.381730 | -0.201388 |

**TS-(3+2)-4c**

|   |          |           |          |
|---|----------|-----------|----------|
| C | 2.382033 | 0.060317  | 0.334974 |
| O | 2.408391 | -0.967208 | 0.966343 |

|   |           |           |           |
|---|-----------|-----------|-----------|
| C | 1.287977  | 1.055665  | 0.361866  |
| H | 1.510425  | 2.085686  | 0.108288  |
| N | 0.431762  | 0.887251  | 1.390547  |
| N | -0.600700 | 0.456796  | 1.642229  |
| O | 3.300188  | 0.419760  | -0.576292 |
| C | 4.338986  | -0.540097 | -0.778216 |
| H | 4.987352  | -0.118462 | -1.543577 |
| H | 4.890711  | -0.702613 | 0.149543  |
| H | 3.917845  | -1.491574 | -1.109131 |
| C | -3.501023 | -0.274621 | 0.201279  |
| C | -1.506445 | -1.605383 | -0.126849 |
| C | -3.040825 | -1.671126 | -0.244088 |
| H | -3.322065 | -1.828876 | -1.290706 |
| H | -3.479405 | -2.477174 | 0.348608  |
| H | -4.508008 | -0.011239 | -0.130446 |
| H | -1.000557 | -2.298670 | -0.804521 |
| C | -2.437499 | 0.646475  | -0.359124 |
| C | -1.188570 | -0.150474 | -0.459148 |
| C | -2.608375 | 1.928548  | -0.687383 |
| H | -1.794177 | 2.536445  | -1.071870 |
| C | -0.058555 | 0.259088  | -1.141840 |
| H | -0.082096 | 1.184041  | -1.710985 |
| H | 0.635729  | -0.490186 | -1.512169 |
| H | -1.195478 | -1.864612 | 0.892018  |
| H | -3.479050 | -0.213865 | 1.297551  |
| H | -3.573507 | 2.411997  | -0.581270 |

**TS-(3+2)-4c-product**

|   |           |           |           |
|---|-----------|-----------|-----------|
| C | -2.170844 | 0.122418  | -0.298369 |
| O | -2.018173 | 1.319844  | -0.293610 |
| C | -1.056622 | -0.891725 | -0.500501 |
| H | -1.464696 | -1.762090 | -1.018484 |
| N | -0.656684 | -1.342259 | 0.883738  |
| N | 0.462845  | -0.935367 | 1.188178  |
| O | -3.341198 | -0.481775 | -0.085119 |
| C | -4.429069 | 0.398355  | 0.206911  |
| H | -5.294533 | -0.241882 | 0.363552  |
| H | -4.211514 | 0.981281  | 1.103708  |
| H | -4.597815 | 1.081399  | -0.627834 |
| C | 3.453529  | 0.686206  | 0.012243  |
| C | 1.226135  | 1.344579  | 0.617324  |
| C | 2.475920  | 1.864704  | -0.101906 |
| H | 2.245038  | 2.061334  | -1.155327 |
| H | 2.861900  | 2.789274  | 0.332508  |
| H | 4.244327  | 0.688262  | -0.742013 |
| H | 0.312747  | 1.908380  | 0.416582  |
| C | 2.562820  | -0.536229 | -0.083465 |
| C | 1.113516  | -0.112682 | 0.128379  |
| C | 2.938209  | -1.790052 | -0.310316 |
| H | 2.212487  | -2.599004 | -0.332560 |
| C | 0.208604  | -0.301111 | -1.106918 |
| H | 0.662105  | -1.000780 | -1.810777 |
| H | 0.013070  | 0.645571  | -1.613706 |
| H | 1.399331  | 1.330422  | 1.699560  |
| H | 3.936821  | 0.704297  | 0.997117  |
| H | 3.979377  | -2.054395 | -0.466211 |

**TS-(3+2)-4d**

|   |           |           |           |
|---|-----------|-----------|-----------|
| C | -3.105862 | -0.440572 | 0.338891  |
| O | -3.461060 | 0.582524  | 0.868227  |
| C | -1.757121 | -1.044989 | 0.464558  |
| H | -1.652975 | -2.115313 | 0.326039  |
| N | -1.036747 | -0.528807 | 1.484746  |
| N | -0.199898 | 0.212208  | 1.724657  |
| O | -3.837586 | -1.147714 | -0.533504 |
| C | -5.117117 | -0.581532 | -0.829515 |
| H | -5.576066 | -1.250958 | -1.553907 |
| H | -5.721368 | -0.518949 | 0.077217  |
| H | -5.000357 | 0.420472  | -1.246809 |
| C | 2.388664  | 1.707152  | 0.085926  |
| C | 0.052798  | 2.276457  | -0.300129 |
| C | 1.481969  | 2.823826  | -0.456318 |
| H | 1.698060  | 2.979266  | -1.518545 |
| H | 1.631463  | 3.776326  | 0.056540  |
| H | 3.405121  | 1.716489  | -0.305450 |
| H | -0.643320 | 2.689034  | -1.035626 |
| C | 1.653670  | 0.430563  | -0.255272 |
| C | 0.237483  | 0.774680  | -0.471002 |
| C | 2.177561  | -0.813180 | -0.322554 |
| H | 1.531263  | -1.652734 | -0.574680 |
| C | -0.680321 | -0.059591 | -1.089220 |
| H | -0.335993 | -0.980835 | -1.550808 |
| H | -1.555060 | 0.383809  | -1.557560 |
| H | -0.343240 | 2.522011  | 0.692344  |
| H | 2.477716  | 1.766210  | 1.179058  |
| C | 3.593538  | -1.128010 | -0.076816 |
| O | 4.412127  | -0.308737 | 0.307540  |
| C | 4.000912  | -2.569552 | -0.325965 |
| H | 3.415290  | -3.242627 | 0.308333  |
| H | 3.799444  | -2.845837 | -1.365705 |
| H | 5.061654  | -2.690268 | -0.109869 |

**TS-(3+2)-4d-product**

|   |           |           |           |
|---|-----------|-----------|-----------|
| C | -3.043931 | -0.215560 | -0.326593 |
| O | -3.205404 | 0.980264  | -0.305775 |
| C | -1.696559 | -0.901978 | -0.493442 |
| H | -1.844794 | -1.840598 | -1.031288 |
| N | -1.240808 | -1.252999 | 0.899968  |
| N | -0.274276 | -0.576689 | 1.247350  |
| O | -4.022495 | -1.106511 | -0.165199 |
| C | -5.312921 | -0.545195 | 0.090021  |
| H | -5.986158 | -1.391603 | 0.206524  |
| H | -5.287488 | 0.057666  | 0.999475  |
| H | -5.622684 | 0.085091  | -0.745679 |
| C | 2.195761  | 1.786209  | -0.077923 |
| C | -0.093029 | 1.835740  | 0.705570  |
| C | 0.930043  | 2.660128  | -0.084346 |
| H | 0.575842  | 2.804404  | -1.111250 |
| H | 1.095675  | 3.649708  | 0.345917  |
| H | 2.841271  | 1.912985  | -0.949330 |
| H | -1.133755 | 2.126390  | 0.547138  |
| C | 1.682538  | 0.369969  | 0.040975  |
| C | 0.173600  | 0.400826  | 0.218712  |
| C | 2.385770  | -0.769824 | 0.037197  |
| H | 1.867987  | -1.718135 | 0.171959  |
| C | -0.611581 | 0.009515  | -1.052786 |

|   |           |           |           |
|---|-----------|-----------|-----------|
| H | 0.026143  | -0.533732 | -1.752185 |
| H | -1.034491 | 0.883371  | -1.551192 |
| H | 0.129516  | 1.881033  | 1.777573  |
| H | 2.831796  | 2.000097  | 0.789248  |
| C | 3.860371  | -0.807676 | -0.110884 |
| O | 4.528019  | 0.201926  | -0.240897 |
| C | 4.498519  | -2.179961 | -0.082247 |
| H | 4.270974  | -2.677709 | 0.865656  |
| H | 4.086469  | -2.803902 | -0.881641 |
| H | 5.576842  | -2.085851 | -0.202705 |

**TS-(3+2)-4e**

|   |           |           |           |
|---|-----------|-----------|-----------|
| C | -3.104905 | -0.421782 | 0.338230  |
| O | -3.453834 | 0.595555  | 0.882615  |
| C | -1.758208 | -1.033940 | 0.451652  |
| H | -1.659169 | -2.103209 | 0.300926  |
| N | -1.031685 | -0.534012 | 1.475602  |
| N | -0.186475 | 0.193970  | 1.723940  |
| O | -3.841906 | -1.114059 | -0.541091 |
| C | -5.120387 | -0.539529 | -0.825580 |
| H | -5.583841 | -1.197815 | -1.557237 |
| H | -5.721506 | -0.486841 | 0.083847  |
| H | -5.001305 | 0.467431  | -1.230085 |
| C | 2.417920  | 1.650796  | 0.109478  |
| C | 0.097965  | 2.274515  | -0.285561 |
| C | 1.539801  | 2.792741  | -0.426950 |
| H | 1.766501  | 2.954420  | -1.485949 |
| H | 1.706988  | 3.735912  | 0.097463  |
| H | 3.439171  | 1.646389  | -0.268999 |
| H | -0.583433 | 2.710177  | -1.021484 |
| C | 1.659372  | 0.396300  | -0.261818 |
| C | 0.251580  | 0.771196  | -0.472312 |
| C | 2.152449  | -0.856195 | -0.353560 |
| H | 1.511210  | -1.691519 | -0.617668 |
| C | -0.682609 | -0.042118 | -1.093780 |
| H | -0.354733 | -0.962536 | -1.568724 |
| H | -1.552849 | 0.420385  | -1.551959 |
| H | -0.299690 | 2.518288  | 0.706709  |
| H | 2.488059  | 1.692237  | 1.204754  |
| C | 3.556386  | -1.182305 | -0.105323 |
| O | 4.436399  | -0.429915 | 0.259168  |
| O | 3.805498  | -2.496669 | -0.326041 |
| H | 4.746280  | -2.620388 | -0.132454 |

**TS-(3+2)-4e-product**

|   |           |           |           |
|---|-----------|-----------|-----------|
| C | -3.038199 | -0.197368 | -0.329246 |
| O | -3.180887 | 1.001111  | -0.330494 |
| C | -1.700776 | -0.907304 | -0.477238 |
| H | -1.860368 | -1.852743 | -0.999597 |
| N | -1.256679 | -1.240925 | 0.923741  |
| N | -0.281182 | -0.574367 | 1.264372  |
| O | -4.031027 | -1.069919 | -0.157120 |
| C | -5.314066 | -0.484576 | 0.081140  |
| H | -6.000668 | -1.318482 | 0.209075  |
| H | -5.284011 | 0.133969  | 0.979853  |
| H | -5.609797 | 0.135232  | -0.767375 |
| C | 2.229049  | 1.737248  | -0.063947 |
| C | -0.068177 | 1.826223  | 0.684522  |



|                            |           |           |           |                    |           |           |           |
|----------------------------|-----------|-----------|-----------|--------------------|-----------|-----------|-----------|
| C                          | 0.974590  | 2.625606  | -0.104956 | C                  | -4.986436 | -0.191950 | 0.092255  |
| H                          | 0.637347  | 2.755021  | -1.139493 | H                  | -5.740116 | -0.965336 | 0.222011  |
| H                          | 1.146241  | 3.620534  | 0.310221  | H                  | -4.902201 | 0.421938  | 0.990658  |
| H                          | 2.896639  | 1.850660  | -0.920224 | H                  | -5.230034 | 0.449807  | -0.756404 |
| H                          | -1.103077 | 2.128008  | 0.510121  | C                  | 2.716066  | 1.410556  | -0.027400 |
| C                          | 1.692934  | 0.328674  | 0.052016  | C                  | 0.420418  | 1.686987  | 0.657965  |
| C                          | 0.183968  | 0.380606  | 0.221478  | C                  | 1.538585  | 2.395101  | -0.117045 |
| C                          | 2.374289  | -0.822013 | 0.047617  | H                  | 1.239737  | 2.530499  | -1.162296 |
| H                          | 1.867135  | -1.773730 | 0.175327  | H                  | 1.776596  | 3.379820  | 0.288843  |
| C                          | -0.599111 | -0.022390 | -1.047245 | H                  | 3.429599  | 1.481742  | -0.852610 |
| H                          | 0.033989  | -0.588417 | -1.732577 | H                  | -0.582882 | 2.071797  | 0.464687  |
| H                          | -1.006185 | 0.848185  | -1.564213 | C                  | 2.057128  | 0.053232  | 0.043411  |
| H                          | 0.142837  | 1.884280  | 1.758254  | C                  | 0.558275  | 0.220659  | 0.207699  |
| H                          | 2.842354  | 1.949248  | 0.819788  | C                  | 2.663363  | -1.138177 | 0.002835  |
| C                          | 3.839178  | -0.855797 | -0.105179 | H                  | 2.107719  | -2.065469 | 0.107109  |
| O                          | 4.569560  | 0.104560  | -0.212380 | C                  | -0.254098 | -0.133483 | -1.056755 |
| O                          | 4.310851  | -2.119301 | -0.112708 | H                  | 0.331000  | -0.756443 | -1.735443 |
| H                          | 5.272541  | -2.049803 | -0.208112 | H                  | -0.589357 | 0.760676  | -1.584861 |
| <b>TS-(3+2)-4f</b>         |           |           |           | H                  | 0.617894  | 1.735680  | 1.734750  |
| C                          | -2.805564 | -0.314800 | 0.319277  | H                  | 3.282649  | 1.570713  | 0.898391  |
| O                          | -2.987786 | 0.737542  | 0.878052  | C                  | 4.082914  | -1.235300 | -0.161702 |
| C                          | -1.560102 | -1.120163 | 0.406052  | N                  | 5.231382  | -1.291780 | -0.301019 |
| H                          | -1.618568 | -2.188263 | 0.229370  | <b>TS-(3+2)-5a</b> |           |           |           |
| N                          | -0.771987 | -0.750317 | 1.439634  | C                  | -3.192925 | -1.178177 | 0.095374  |
| N                          | 0.144358  | -0.121781 | 1.706863  | O                  | -3.803280 | -2.002673 | -0.540407 |
| O                          | -3.649819 | -0.879945 | -0.552469 | C                  | -1.843335 | -1.420153 | 0.646784  |
| C                          | -4.834882 | -0.120007 | -0.809482 | H                  | -1.603754 | -2.450169 | 0.882416  |
| H                          | -5.400978 | -0.694194 | -1.539608 | N                  | -1.366824 | -0.507427 | 1.515432  |
| H                          | -5.407005 | 0.008415  | 0.110930  | N                  | -0.631525 | 0.375388  | 1.581546  |
| H                          | -4.574864 | 0.863335  | -1.205760 | O                  | -3.604156 | 0.085477  | 0.290656  |
| C                          | 2.780211  | 1.238319  | 0.248487  | C                  | -4.855407 | 0.402987  | -0.321135 |
| C                          | 0.526770  | 2.008612  | -0.231844 | H                  | -5.057005 | 1.439783  | -0.060026 |
| C                          | 1.999854  | 2.457219  | -0.269537 | H                  | -4.788341 | 0.282838  | -1.404293 |
| H                          | 2.294277  | 2.661236  | -1.303880 | H                  | -5.641209 | -0.252147 | 0.059278  |
| H                          | 2.186312  | 3.358996  | 0.316868  | C                  | 1.557121  | 0.298853  | -0.217874 |
| H                          | 3.828940  | 1.211092  | -0.054876 | C                  | 0.122186  | 0.304334  | -0.596674 |
| H                          | -0.085405 | 2.510724  | -0.986236 | C                  | -0.481118 | 1.649235  | -0.982751 |
| C                          | 1.991520  | 0.061699  | -0.275130 | C                  | 0.037033  | 2.823952  | -0.150946 |
| C                          | 0.606459  | 0.506362  | -0.476889 | C                  | 1.562589  | 2.809087  | -0.091856 |
| C                          | 2.484866  | -1.173392 | -0.497529 | C                  | 2.078807  | 1.505251  | 0.529650  |
| H                          | 1.864167  | -1.983841 | -0.865870 | H                  | -0.236222 | 1.841085  | -2.037971 |
| C                          | -0.372983 | -0.235672 | -1.117162 | H                  | -0.320575 | 3.763803  | -0.584614 |
| H                          | -0.105712 | -1.176499 | -1.590881 | H                  | 1.967873  | 2.904874  | -1.107573 |
| H                          | -1.198536 | 0.288435  | -1.591035 | H                  | 3.172115  | 1.485965  | 0.512527  |
| H                          | 0.079946  | 2.232919  | 0.743862  | C                  | 2.380373  | -0.704416 | -0.572648 |
| H                          | 2.750743  | 1.207103  | 1.345783  | C                  | -0.547930 | -0.843507 | -0.997416 |
| C                          | 3.858393  | -1.478226 | -0.259630 | H                  | 2.024643  | -1.494061 | -1.238336 |
| N                          | 4.976239  | -1.719323 | -0.065496 | H                  | -1.375030 | -0.755060 | -1.697614 |
| <b>TS-(3+2)-4f-product</b> |           |           |           | H                  | -0.036529 | -1.800096 | -1.015184 |
| C                          | -2.695581 | -0.099254 | -0.325871 | H                  | -1.573305 | 1.583421  | -0.916911 |
| O                          | -2.733898 | 1.107109  | -0.330639 | H                  | -0.364037 | 2.766554  | 0.866881  |
| C                          | -1.422957 | -0.920470 | -0.476424 | H                  | 1.932930  | 3.663722  | 0.483628  |
| H                          | -1.664017 | -1.851856 | -0.992633 | H                  | 1.760649  | 1.468848  | 1.580853  |
| N                          | -1.000452 | -1.281110 | 0.923674  | N                  | 3.723205  | -0.819192 | -0.150757 |
| N                          | 0.024084  | -0.689777 | 1.259286  | C                  | 4.506589  | -1.712889 | -0.982937 |
| O                          | -3.757072 | -0.883647 | -0.148061 | H                  | 5.559457  | -1.651895 | -0.694697 |
|                            |           |           |           | H                  | 4.186909  | -2.766584 | -0.893918 |

|   |          |           |           |
|---|----------|-----------|-----------|
| H | 4.421768 | -1.412210 | -2.029294 |
| C | 3.894980 | -1.112801 | 1.266591  |
| H | 3.567658 | -2.134146 | 1.525019  |
| H | 4.951955 | -1.013107 | 1.531446  |
| H | 3.321783 | -0.405764 | 1.867870  |

**TS-(3+2)-5a-product**

|   |           |           |           |
|---|-----------|-----------|-----------|
| C | -3.042531 | -0.977296 | 0.059783  |
| O | -3.570377 | -2.059780 | 0.073324  |
| C | -1.553528 | -0.731595 | 0.174399  |
| H | -1.078480 | -1.698749 | 0.366283  |
| N | -1.287773 | 0.134576  | 1.373382  |
| N | -0.423895 | 0.977665  | 1.142263  |
| O | -3.710166 | 0.178853  | -0.065372 |
| C | -5.129209 | 0.044537  | -0.150901 |
| H | -5.519968 | 1.056678  | -0.233590 |
| H | -5.402533 | -0.549067 | -1.025666 |
| H | -5.515872 | -0.447016 | 0.743723  |
| C | 1.502941  | 0.267445  | -0.096916 |
| C | 0.125430  | 0.894541  | -0.263404 |
| C | 0.213946  | 2.319319  | -0.825740 |
| C | 1.228989  | 3.190872  | -0.088289 |
| C | 2.604817  | 2.530805  | -0.091466 |
| C | 2.545119  | 1.142761  | 0.557566  |
| H | 0.491447  | 2.240037  | -1.885036 |
| H | 1.272713  | 4.179319  | -0.556667 |
| H | 2.959977  | 2.428185  | -1.124859 |
| H | 3.516173  | 0.645894  | 0.487428  |
| C | 1.765253  | -0.999573 | -0.446139 |
| C | -0.926428 | 0.040537  | -0.982419 |
| H | 1.015043  | -1.606981 | -0.958364 |
| H | -1.675906 | 0.699763  | -1.429352 |
| H | -0.517004 | -0.595832 | -1.765562 |
| H | -0.785789 | 2.766492  | -0.782060 |
| H | 0.893706  | 3.333320  | 0.945124  |
| H | 3.332326  | 3.153673  | 0.438261  |
| H | 2.303171  | 1.262869  | 1.622989  |
| N | 2.992655  | -1.651058 | -0.184389 |
| C | 3.226948  | -2.777498 | -1.070694 |
| H | 4.232107  | -3.171415 | -0.900187 |
| H | 2.504604  | -3.598309 | -0.914336 |
| H | 3.161291  | -2.449861 | -2.110450 |
| C | 3.172453  | -2.023749 | 1.215742  |
| H | 2.475670  | -2.818485 | 1.529848  |
| H | 4.195133  | -2.382500 | 1.363677  |
| H | 3.014415  | -1.155520 | 1.857265  |

**TS-(3+2)-5b**

|   |           |           |           |
|---|-----------|-----------|-----------|
| C | -2.879877 | -0.743940 | 0.104291  |
| O | -3.651958 | -1.434065 | -0.515790 |
| C | -1.636452 | -1.265114 | 0.708571  |
| H | -1.645601 | -2.311481 | 0.989362  |
| N | -0.980412 | -0.448646 | 1.554950  |
| N | -0.063366 | 0.245243  | 1.605517  |
| O | -2.988506 | 0.588778  | 0.231565  |
| C | -4.118068 | 1.157579  | -0.432465 |
| H | -4.077633 | 2.224371  | -0.222430 |
| H | -4.058550 | 0.972348  | -1.506881 |

|   |           |           |           |
|---|-----------|-----------|-----------|
| H | -5.042821 | 0.722232  | -0.049456 |
| C | 2.094381  | -0.408398 | -0.126599 |
| C | 0.703158  | -0.084269 | -0.530083 |
| C | 0.460051  | 1.352661  | -0.975237 |
| C | 1.225256  | 2.394821  | -0.154450 |
| C | 2.700718  | 2.017233  | -0.024428 |
| C | 2.859291  | 0.644152  | 0.641077  |
| H | 0.778936  | 1.440025  | -2.024631 |
| H | 1.122597  | 3.376545  | -0.628827 |
| H | 3.159442  | 1.987485  | -1.021516 |
| H | 3.912364  | 0.360807  | 0.698624  |
| C | 2.683542  | -1.550275 | -0.499716 |
| C | -0.208512 | -1.055538 | -0.919021 |
| H | 2.186164  | -2.275160 | -1.139970 |
| H | -0.978982 | -0.800322 | -1.642320 |
| H | 0.065409  | -2.105614 | -0.897884 |
| H | -0.616246 | 1.559150  | -0.950554 |
| H | 0.786342  | 2.474682  | 0.845912  |
| H | 3.237584  | 2.775992  | 0.554359  |
| H | 2.478620  | 0.704169  | 1.668250  |
| O | 3.942814  | -1.884295 | -0.080487 |
| H | 4.279093  | -2.598224 | -0.629255 |

**TS-(3+2)-5b-product**

|   |           |           |           |
|---|-----------|-----------|-----------|
| C | -2.870302 | -0.670524 | 0.062790  |
| O | -3.892684 | -1.305194 | 0.076142  |
| C | -1.500799 | -1.210769 | 0.429704  |
| H | -1.656806 | -2.238116 | 0.763331  |
| N | -0.985334 | -0.432972 | 1.602432  |
| N | 0.075302  | 0.133173  | 1.356527  |
| O | -2.799192 | 0.622351  | -0.290574 |
| C | -4.050132 | 1.221596  | -0.633978 |
| H | -3.826104 | 2.257381  | -0.880788 |
| H | -4.495127 | 0.706994  | -1.487876 |
| H | -4.738498 | 1.165406  | 0.211088  |
| C | 2.023349  | -0.462874 | 0.024272  |
| C | 0.564151  | -0.057708 | -0.051393 |
| C | 0.468974  | 1.332791  | -0.723213 |
| C | 1.369868  | 2.375239  | -0.057659 |
| C | 2.822475  | 1.901497  | -0.003279 |
| C | 2.925142  | 0.541273  | 0.701339  |
| H | 0.767874  | 1.198347  | -1.770854 |
| H | 1.295339  | 3.320082  | -0.606055 |
| H | 3.215172  | 1.803795  | -1.023521 |
| H | 3.953772  | 0.176664  | 0.694976  |
| C | 2.516113  | -1.558388 | -0.553630 |
| C | -0.434481 | -1.061803 | -0.663063 |
| H | 1.904550  | -2.270673 | -1.098935 |
| H | -0.851075 | -0.676547 | -1.595798 |
| H | 0.011023  | -2.034470 | -0.864290 |
| H | -0.578462 | 1.651314  | -0.711168 |
| H | 1.010042  | 2.562136  | 0.959951  |
| H | 3.443948  | 2.639675  | 0.513743  |
| H | 2.612774  | 0.657334  | 1.745753  |
| O | 3.852187  | -1.847305 | -0.509962 |
| H | 4.013160  | -2.681531 | -0.958458 |

**TS-(3+2)-5c**

|   |           |           |           |
|---|-----------|-----------|-----------|
| C | 2.535379  | -0.250534 | 0.392840  |
| O | 2.512862  | 0.559662  | 1.284883  |
| C | 1.483349  | -1.249793 | 0.102966  |
| H | 1.770404  | -2.186325 | -0.361360 |
| N | 0.540994  | -1.354093 | 1.057692  |
| N | -0.548855 | -1.080871 | 1.293607  |
| O | 3.490821  | -0.321993 | -0.549461 |
| C | 4.505704  | 0.676957  | -0.436485 |
| H | 5.187805  | 0.501792  | -1.265995 |
| H | 4.065771  | 1.674203  | -0.500840 |
| H | 5.026209  | 0.582905  | 0.518494  |
| C | -1.444016 | 1.219906  | -0.108437 |
| C | -1.024820 | -0.067304 | -0.732413 |
| C | -2.133612 | -1.041481 | -1.112330 |
| C | -3.306388 | -1.079480 | -0.130629 |
| C | -3.786362 | 0.335464  | 0.189157  |
| C | -2.648310 | 1.154002  | 0.807324  |
| H | -2.523521 | -0.740122 | -2.095810 |
| H | -4.119830 | -1.674547 | -0.558546 |
| H | -4.128480 | 0.824703  | -0.732284 |
| H | -2.983522 | 2.168330  | 1.042136  |
| C | -0.834542 | 2.386885  | -0.340706 |
| C | 0.214529  | -0.217825 | -1.331032 |
| H | 0.006074  | 2.484899  | -1.018847 |
| H | 0.340416  | -0.979317 | -2.095954 |
| H | 0.893484  | 0.624806  | -1.411691 |
| H | -1.708907 | -2.044034 | -1.243775 |
| H | -3.001071 | -1.571916 | 0.799216  |
| H | -4.639586 | 0.304900  | 0.874302  |
| H | -2.356273 | 0.679236  | 1.752760  |
| H | -1.168882 | 3.293104  | 0.154202  |

**TS-(3+2)-5c-product**

|   |           |           |           |
|---|-----------|-----------|-----------|
| C | -2.254150 | -0.328982 | -0.352233 |
| O | -2.430720 | 0.088055  | -1.464084 |
| C | -1.248508 | -1.397134 | 0.054603  |
| H | -1.811085 | -2.307478 | 0.280651  |
| N | -0.358185 | -1.671343 | -1.114707 |
| N | 0.763363  | -1.195438 | -0.948575 |
| O | -2.949193 | 0.088317  | 0.723471  |
| C | -3.911472 | 1.106919  | 0.442174  |
| H | -4.392047 | 1.333689  | 1.391874  |
| H | -3.414114 | 1.991614  | 0.037677  |
| H | -4.641346 | 0.749907  | -0.286654 |
| C | 0.908835  | 1.010920  | 0.027230  |
| C | 0.911678  | -0.474158 | 0.373871  |
| C | 2.262013  | -0.876825 | 0.985744  |
| C | 3.456003  | -0.432357 | 0.139392  |
| C | 3.408222  | 1.070275  | -0.134776 |
| C | 2.084852  | 1.447099  | -0.813711 |
| H | 2.320186  | -0.423405 | 1.983792  |
| H | 4.385884  | -0.700797 | 0.650663  |
| H | 3.497391  | 1.621332  | 0.810324  |
| H | 2.029216  | 2.524373  | -0.993762 |
| C | -0.026353 | 1.870165  | 0.430868  |
| C | -0.291742 | -0.979358 | 1.171053  |
| H | -0.877808 | 1.585198  | 1.040195  |
| H | 0.002098  | -1.858219 | 1.751625  |

|   |           |           |           |
|---|-----------|-----------|-----------|
| H | -0.717878 | -0.248869 | 1.855447  |
| H | 2.270227  | -1.964742 | 1.120059  |
| H | 3.437912  | -0.974709 | -0.812093 |
| H | 4.250680  | 1.370504  | -0.765442 |
| H | 2.031612  | 0.942946  | -1.786657 |
| H | 0.035852  | 2.915772  | 0.144895  |

**TS-(3+2)-5d**

|   |           |           |           |
|---|-----------|-----------|-----------|
| C | -3.126393 | -0.415919 | 0.360299  |
| O | -3.518133 | 0.637542  | 0.797434  |
| C | -1.752682 | -0.951101 | 0.523332  |
| H | -1.604358 | -2.024559 | 0.477674  |
| N | -1.045401 | -0.326800 | 1.489409  |
| N | -0.213080 | 0.432153  | 1.681229  |
| O | -3.837103 | -1.229968 | -0.431075 |
| C | -5.141617 | -0.745557 | -0.762214 |
| H | -5.579971 | -1.499012 | -1.413013 |
| H | -5.738677 | -0.620133 | 0.142699  |
| H | -5.069250 | 0.215439  | -1.275059 |
| C | 1.604761  | 0.220689  | -0.358678 |
| C | 0.244859  | 0.737637  | -0.608116 |
| C | -0.054995 | 2.230664  | -0.562220 |
| C | 1.001657  | 3.039558  | 0.180230  |
| C | 2.373398  | 2.669078  | -0.371325 |
| C | 2.709998  | 1.213338  | -0.054712 |
| H | -0.115764 | 2.610965  | -1.591760 |
| H | 0.801187  | 4.108601  | 0.061275  |
| H | 2.376237  | 2.827943  | -1.457812 |
| H | 3.620414  | 0.895655  | -0.566144 |
| C | 1.843568  | -1.118472 | -0.321991 |
| C | -0.745319 | -0.084915 | -1.134128 |
| H | 1.025901  | -1.810692 | -0.508593 |
| H | -1.621892 | 0.397631  | -1.561128 |
| H | -0.492101 | -1.035816 | -1.590053 |
| H | -1.048674 | 2.375355  | -0.120963 |
| H | 0.965575  | 2.817168  | 1.253515  |
| H | 3.155281  | 3.311950  | 0.043655  |
| H | 2.950962  | 1.113708  | 1.012048  |
| C | 3.133381  | -1.759699 | -0.033111 |
| O | 4.146347  | -1.162867 | 0.298235  |
| C | 3.147230  | -3.274781 | -0.162607 |
| H | 2.419905  | -3.721248 | 0.523049  |
| H | 2.864321  | -3.573286 | -1.176865 |
| H | 4.144315  | -3.647919 | 0.067704  |

**TS-(3+2)-5d-product**

|   |           |           |           |
|---|-----------|-----------|-----------|
| C | -3.159230 | -0.226421 | -0.237271 |
| O | -3.668356 | 0.452915  | -1.092983 |
| C | -1.666859 | -0.316210 | 0.021306  |
| H | -1.420377 | -1.339752 | 0.324802  |
| N | -1.354867 | 0.555386  | 1.212655  |
| N | -0.330024 | 1.208533  | 1.036206  |
| O | -3.840684 | -0.978381 | 0.630219  |
| C | -5.262731 | -0.887605 | 0.516890  |
| H | -5.664173 | -1.541352 | 1.288212  |
| H | -5.588233 | 0.142171  | 0.674912  |
| H | -5.584941 | -1.213128 | -0.474113 |
| C | 1.544616  | 0.071087  | 0.051870  |

|   |           |           |           |
|---|-----------|-----------|-----------|
| C | 0.326064  | 0.928899  | -0.299324 |
| C | 0.761787  | 2.264711  | -0.922273 |
| C | 1.823310  | 2.997261  | -0.103976 |
| C | 3.022708  | 2.092190  | 0.160227  |
| C | 2.582392  | 0.801562  | 0.867464  |
| H | 1.147971  | 2.045956  | -1.926367 |
| H | 2.129917  | 3.904227  | -0.634490 |
| H | 3.514199  | 1.835835  | -0.786808 |
| H | 3.429187  | 0.151556  | 1.069521  |
| C | 1.632401  | -1.215449 | -0.329026 |
| C | -0.797661 | 0.249212  | -1.085223 |
| H | 0.819708  | -1.656938 | -0.898762 |
| H | -1.376144 | 1.002935  | -1.627145 |
| H | -0.454853 | -0.491585 | -1.805334 |
| H | -0.131433 | 2.886637  | -1.047193 |
| H | 1.386280  | 3.309391  | 0.850850  |
| H | 3.765379  | 2.606041  | 0.777480  |
| H | 2.114931  | 1.075062  | 1.822638  |
| C | 2.744582  | -2.170873 | -0.053449 |
| O | 3.788492  | -1.884704 | 0.498362  |
| C | 2.486628  | -3.586566 | -0.532616 |
| H | 1.581710  | -3.985085 | -0.062892 |
| H | 2.320737  | -3.593769 | -1.614672 |
| H | 3.340702  | -4.215061 | -0.285055 |

**TS-(3+2)-5e**

|   |           |           |           |
|---|-----------|-----------|-----------|
| C | -3.125724 | -0.394685 | 0.362479  |
| O | -3.512516 | 0.656496  | 0.809418  |
| C | -1.752602 | -0.934955 | 0.516110  |
| H | -1.605986 | -2.008533 | 0.464068  |
| N | -1.039578 | -0.318735 | 1.483051  |
| N | -0.200780 | 0.430903  | 1.680221  |
| O | -3.841375 | -1.200792 | -0.431945 |
| C | -5.146354 | -0.711480 | -0.753877 |
| H | -5.588672 | -1.459109 | -1.408666 |
| H | -5.739364 | -0.592104 | 0.154514  |
| H | -5.074325 | 0.253335  | -1.259547 |
| C | 1.600638  | 0.186055  | -0.367534 |
| C | 0.255154  | 0.735836  | -0.616807 |
| C | -0.008550 | 2.235100  | -0.568593 |
| C | 1.061667  | 3.017844  | 0.182830  |
| C | 2.430058  | 2.612037  | -0.352226 |
| C | 2.724189  | 1.148271  | -0.030832 |
| H | -0.053803 | 2.619252  | -1.597514 |
| H | 0.890315  | 4.091410  | 0.059242  |
| H | 2.451180  | 2.769447  | -1.438649 |
| H | 3.638901  | 0.810998  | -0.520543 |
| C | 1.802928  | -1.157092 | -0.352782 |
| C | -0.753613 | -0.065806 | -1.139665 |
| H | 0.990752  | -1.846029 | -0.554611 |
| H | -1.624449 | 0.435689  | -1.556484 |
| H | -0.521584 | -1.017827 | -1.604438 |
| H | -1.001114 | 2.402742  | -0.133093 |
| H | 1.008605  | 2.799544  | 1.256198  |
| H | 3.222979  | 3.234462  | 0.072820  |
| H | 2.929283  | 1.043715  | 1.043065  |
| C | 3.075819  | -1.808836 | -0.052415 |
| O | 4.127563  | -1.296413 | 0.274465  |

|   |          |           |           |
|---|----------|-----------|-----------|
| O | 2.968138 | -3.157811 | -0.168394 |
| H | 3.843650 | -3.507747 | 0.052265  |

**TS-(3+2)-5e-product**

|   |           |           |           |
|---|-----------|-----------|-----------|
| C | -3.165730 | -0.228433 | -0.238122 |
| O | -3.671325 | 0.462634  | -1.086540 |
| C | -1.673237 | -0.330363 | 0.017200  |
| H | -1.432647 | -1.358679 | 0.309028  |
| N | -1.354527 | 0.526769  | 1.216249  |
| N | -0.327830 | 1.178324  | 1.044958  |
| O | -3.850548 | -0.983875 | 0.623163  |
| C | -5.272161 | -0.885026 | 0.511235  |
| H | -5.676463 | -1.544225 | 1.276371  |
| H | -5.592562 | 0.144791  | 0.679182  |
| H | -5.596090 | -1.199592 | -0.482721 |
| C | 1.538832  | 0.047346  | 0.043026  |
| C | 0.322996  | 0.911430  | -0.296355 |
| C | 0.761922  | 2.252618  | -0.904807 |
| C | 1.827051  | 2.971659  | -0.079010 |
| C | 3.024332  | 2.059942  | 0.172241  |
| C | 2.582187  | 0.761955  | 0.864745  |
| H | 1.145391  | 2.044808  | -1.912203 |
| H | 2.136253  | 3.883915  | -0.598695 |
| H | 3.513370  | 1.813651  | -0.778711 |
| H | 3.428286  | 0.107440  | 1.058097  |
| C | 1.615712  | -1.231664 | -0.357322 |
| C | -0.803359 | 0.241191  | -1.086111 |
| H | 0.820059  | -1.684716 | -0.936174 |
| H | -1.379844 | 1.000911  | -1.621670 |
| H | -0.464346 | -0.495682 | -1.811940 |
| H | -0.129598 | 2.878640  | -1.020249 |
| H | 1.392454  | 3.273465  | 0.880190  |
| H | 3.769556  | 2.563991  | 0.794405  |
| H | 2.118752  | 1.023354  | 1.825024  |
| C | 2.732207  | -2.165526 | -0.082727 |
| O | 3.774126  | -1.953238 | 0.493616  |
| O | 2.444655  | -3.384164 | -0.591205 |
| H | 3.204154  | -3.949354 | -0.384611 |

**TS-(3+2)-5f**

|   |           |           |           |
|---|-----------|-----------|-----------|
| C | -2.959559 | -0.928144 | 0.056251  |
| O | -3.696442 | -1.606879 | -0.613577 |
| C | -1.628389 | -1.395875 | 0.512383  |
| H | -1.523860 | -2.465890 | 0.650159  |
| N | -1.011124 | -0.642058 | 1.443467  |
| N | -0.174489 | 0.123320  | 1.602714  |
| O | -3.185354 | 0.351798  | 0.384806  |
| C | -4.414703 | 0.886890  | -0.115178 |
| H | -4.459896 | 1.910598  | 0.249678  |
| H | -4.419743 | 0.863102  | -1.206521 |
| H | -5.258972 | 0.304409  | 0.257265  |
| C | 1.898626  | -0.137489 | -0.257677 |
| C | 0.500578  | 0.145532  | -0.645844 |
| C | 0.095111  | 1.594365  | -0.891783 |
| C | 0.835947  | 2.613025  | -0.026726 |
| C | 2.337686  | 2.344200  | -0.061759 |
| C | 2.640776  | 0.948448  | 0.489687  |
| H | 0.293994  | 1.829502  | -1.947352 |

|   |           |           |           |
|---|-----------|-----------|-----------|
| H | 0.614957  | 3.623598  | -0.384096 |
| H | 2.703183  | 2.419112  | -1.093856 |
| H | 3.713927  | 0.745263  | 0.470479  |
| C | 2.502669  | -1.314184 | -0.538810 |
| C | -0.349673 | -0.845808 | -1.115711 |
| H | 2.012940  | -2.092906 | -1.111298 |
| H | -1.174756 | -0.558622 | -1.762818 |
| H | 0.002706  | -1.859996 | -1.268343 |
| H | -0.988001 | 1.684501  | -0.749745 |
| H | 0.484099  | 2.552858  | 1.009454  |
| H | 2.879748  | 3.091323  | 0.525296  |
| H | 2.325407  | 0.912953  | 1.540792  |
| C | 3.833644  | -1.613809 | -0.113776 |
| N | 4.913091  | -1.867272 | 0.225923  |

**TS-(3+2)-5f-product**

|   |           |           |           |
|---|-----------|-----------|-----------|
| C | -3.013093 | -0.808860 | 0.060256  |
| O | -3.996910 | -1.499425 | 0.089288  |
| C | -1.625816 | -1.249631 | 0.494747  |
| H | -1.735004 | -2.263395 | 0.883446  |
| N | -1.189859 | -0.380593 | 1.631699  |
| N | -0.161136 | 0.239745  | 1.383195  |
| O | -3.000759 | 0.461325  | -0.371617 |
| C | -4.273268 | 0.968340  | -0.784461 |
| H | -4.097914 | 1.997131  | -1.091831 |
| H | -4.664251 | 0.376341  | -1.614009 |
| H | -4.980195 | 0.927027  | 0.045769  |
| C | 1.852847  | -0.263550 | 0.095773  |
| C | 0.363685  | 0.010049  | -0.006965 |
| C | 0.192126  | 1.356917  | -0.756168 |
| C | 0.977439  | 2.496452  | -0.103376 |
| C | 2.456411  | 2.141009  | 0.046735  |
| C | 2.627710  | 0.813334  | 0.807328  |
| H | 0.543483  | 1.197883  | -1.783570 |
| H | 0.864907  | 3.402589  | -0.706763 |
| H | 2.918036  | 2.041632  | -0.943571 |
| H | 3.682810  | 0.540787  | 0.879488  |
| C | 2.444152  | -1.298531 | -0.521099 |
| C | -0.534933 | -1.102964 | -0.574750 |
| H | 1.893542  | -2.034112 | -1.094925 |
| H | -0.942366 | -0.821832 | -1.547625 |
| H | -0.008659 | -2.050447 | -0.682370 |
| H | -0.877281 | 1.584207  | -0.797869 |
| H | 0.550882  | 2.707940  | 0.882544  |
| H | 2.991248  | 2.935666  | 0.574587  |
| H | 2.228114  | 0.926541  | 1.820483  |
| C | 3.864890  | -1.492215 | -0.487566 |
| N | 5.011153  | -1.657047 | -0.470305 |

**TS-(3+2)-6a**

|   |           |           |           |
|---|-----------|-----------|-----------|
| C | 2.760283  | -0.193579 | 0.238149  |
| O | 3.530164  | 0.407195  | -0.478297 |
| C | 1.640675  | 0.467473  | 0.917846  |
| H | 1.880299  | 1.438941  | 1.338670  |
| N | 0.812364  | -0.272602 | 1.709499  |
| N | -0.289425 | -0.603019 | 1.749738  |
| O | 2.792344  | -1.523924 | 0.427598  |
| C | 3.787991  | -2.209038 | -0.333455 |

|   |           |           |           |
|---|-----------|-----------|-----------|
| H | 3.684988  | -3.260715 | -0.073890 |
| H | 3.619761  | -2.056995 | -1.401929 |
| H | 4.782953  | -1.841390 | -0.076159 |
| C | -3.134943 | -0.124502 | 1.109380  |
| C | -2.446947 | 0.609900  | -0.058651 |
| C | -2.617557 | -1.504199 | -0.841902 |
| C | -3.148183 | -1.601115 | 0.616213  |
| H | -2.614401 | -0.002522 | 2.060412  |
| H | -4.154426 | 0.254458  | 1.232316  |
| H | -2.510856 | -2.247258 | 1.225123  |
| H | -4.160561 | -2.015138 | 0.628012  |
| C | -3.112121 | -0.106898 | -1.257072 |
| H | -2.717973 | 0.219370  | -2.222932 |
| H | -4.203271 | -0.012478 | -1.247499 |
| H | -2.556235 | 1.694848  | -0.053832 |
| H | -2.895992 | -2.346499 | -1.477654 |
| C | -1.001082 | 0.123656  | -0.230769 |
| C | -1.124408 | -1.255603 | -0.769764 |
| C | 0.057024  | 0.960338  | -0.601249 |
| H | 0.732504  | 0.608935  | -1.379265 |
| C | -0.158529 | -2.111733 | -1.109342 |
| H | 0.892165  | -1.873138 | -0.978564 |
| N | -0.009302 | 2.357301  | -0.506763 |
| C | -0.358517 | 2.925833  | 0.784460  |
| H | 0.540321  | 3.123298  | 1.393726  |
| H | -0.882679 | 3.876743  | 0.649760  |
| H | -1.004486 | 2.247371  | 1.342729  |
| C | 1.116563  | 3.045101  | -1.110648 |
| H | 0.920548  | 4.120135  | -1.120384 |
| H | 2.057113  | 2.859421  | -0.562991 |
| H | 1.251777  | 2.709475  | -2.140589 |
| H | -0.398562 | -3.088595 | -1.515975 |

**TS-(3+2)-6a-product**

|   |           |           |           |
|---|-----------|-----------|-----------|
| C | 2.462546  | -0.169525 | -0.188780 |
| O | 2.732931  | -0.030048 | -1.355701 |
| C | 1.416512  | 0.669023  | 0.523349  |
| H | 1.936246  | 1.588230  | 0.820700  |
| N | 0.893563  | 0.035542  | 1.772121  |
| N | -0.291307 | -0.291866 | 1.652667  |
| O | 3.071306  | -1.040801 | 0.621069  |
| C | 4.062784  | -1.850909 | -0.014819 |
| H | 4.460199  | -2.496858 | 0.765100  |
| H | 3.608225  | -2.440711 | -0.814071 |
| H | 4.849176  | -1.225069 | -0.440498 |
| C | -3.164763 | -0.667449 | 0.983595  |
| C | -2.313916 | 0.369858  | 0.217699  |
| C | -2.235477 | -1.462495 | -1.107088 |
| C | -3.190274 | -1.898515 | 0.029837  |
| H | -2.727959 | -0.901625 | 1.955906  |
| H | -4.171212 | -0.274965 | 1.149892  |
| H | -2.852568 | -2.817522 | 0.512903  |
| H | -4.194501 | -2.070203 | -0.370402 |
| C | -2.617992 | 0.020843  | -1.251115 |
| H | -2.000790 | 0.580682  | -1.958658 |
| H | -3.673559 | 0.159589  | -1.502983 |
| H | -2.498260 | 1.405711  | 0.495505  |
| H | -2.276359 | -2.087190 | -2.000978 |

|   |           |           |           |
|---|-----------|-----------|-----------|
| C | -0.828990 | -0.042686 | 0.290258  |
| C | -0.866576 | -1.382075 | -0.464664 |
| C | 0.175601  | 0.952836  | -0.343582 |
| H | 0.384071  | 0.685862  | -1.380988 |
| C | 0.074368  | -2.319992 | -0.443711 |
| H | 0.969965  | -2.226013 | 0.164389  |
| N | -0.282031 | 2.333365  | -0.328436 |
| C | -0.384516 | 2.928623  | 0.995606  |
| H | 0.594771  | 3.122660  | 1.467494  |
| H | -0.906508 | 3.886174  | 0.914187  |
| H | -0.954878 | 2.284478  | 1.668317  |
| C | 0.518763  | 3.169211  | -1.207723 |
| H | 0.084769  | 4.172108  | -1.245674 |
| H | 1.569339  | 3.265676  | -0.878310 |
| H | 0.518969  | 2.752104  | -2.217775 |
| H | -0.043031 | -3.236089 | -1.014642 |

**TS-(3+2)-6b**

|   |           |           |           |
|---|-----------|-----------|-----------|
| C | 2.939255  | 0.151781  | 0.334524  |
| O | 2.960924  | -0.946943 | 0.832317  |
| C | 1.846530  | 1.136393  | 0.477645  |
| H | 2.061673  | 2.188618  | 0.337305  |
| N | 0.978930  | 0.838088  | 1.462477  |
| N | -0.025630 | 0.310239  | 1.644038  |
| O | 3.864475  | 0.619841  | -0.520183 |
| C | 4.901250  | -0.310924 | -0.834457 |
| H | 5.555051  | 0.199863  | -1.538560 |
| H | 5.447996  | -0.589516 | 0.068407  |
| H | 4.479397  | -1.212780 | -1.282785 |
| C | -2.815451 | -1.301296 | 0.944920  |
| C | -2.948560 | -0.537620 | -0.401193 |
| C | -0.932439 | -1.559676 | -0.562245 |
| C | -1.473886 | -2.074452 | 0.787088  |
| H | -2.800710 | -0.608954 | 1.790070  |
| H | -3.656159 | -1.987695 | 1.083211  |
| H | -0.784028 | -1.912579 | 1.615484  |
| H | -1.653743 | -3.151456 | 0.711192  |
| C | -2.249522 | -1.511872 | -1.374473 |
| H | -2.123095 | -1.097285 | -2.377984 |
| H | -2.744377 | -2.487031 | -1.432606 |
| H | -3.963258 | -0.223956 | -0.646487 |
| H | -0.119476 | -2.158930 | -0.977989 |
| C | -1.940861 | 0.591993  | -0.374845 |
| C | -0.612837 | -0.063257 | -0.514534 |
| C | -2.194922 | 1.889997  | -0.227195 |
| H | -1.397898 | 2.631622  | -0.185883 |
| C | 0.492090  | 0.496915  | -1.128834 |
| H | 0.422865  | 1.495963  | -1.550258 |
| H | 1.225026  | -0.153468 | -1.598107 |
| O | -3.478786 | 2.360813  | -0.127883 |
| H | -3.459148 | 3.311705  | 0.006966  |

**TS-(3+2)-6b-product**

|   |          |           |           |
|---|----------|-----------|-----------|
| C | 2.781252 | 0.109731  | -0.300081 |
| O | 2.673213 | -1.024797 | -0.697360 |
| C | 1.639907 | 1.109584  | -0.217759 |
| H | 2.041158 | 2.114262  | -0.365250 |
| N | 1.138067 | 1.031355  | 1.205812  |

|   |           |           |           |
|---|-----------|-----------|-----------|
| N | 0.023357  | 0.515220  | 1.264803  |
| O | 3.917815  | 0.632285  | 0.166128  |
| C | 5.021570  | -0.274603 | 0.213465  |
| H | 5.855169  | 0.293598  | 0.620690  |
| H | 4.783085  | -1.125170 | 0.854647  |
| H | 5.254282  | -0.640443 | -0.788470 |
| C | -2.881472 | -1.502371 | 0.845558  |
| C | -2.793214 | -0.711272 | -0.481210 |
| C | -0.665036 | -1.422777 | -0.168649 |
| C | -1.412286 | -1.971111 | 1.066223  |
| H | -3.252334 | -0.875965 | 1.659379  |
| H | -3.558411 | -2.355592 | 0.736885  |
| H | -0.988850 | -1.601220 | 2.000655  |
| H | -1.345463 | -3.062522 | 1.073401  |
| C | -1.749836 | -1.541403 | -1.255834 |
| H | -1.465552 | -1.094622 | -2.213167 |
| H | -2.062622 | -2.577557 | -1.417783 |
| H | -3.751345 | -0.525603 | -0.967311 |
| H | 0.298155  | -1.895363 | -0.370831 |
| C | -1.993566 | 0.536095  | -0.191636 |
| C | -0.536043 | 0.121992  | -0.060113 |
| C | -2.443663 | 1.771904  | -0.008570 |
| H | -1.771283 | 2.592698  | 0.239750  |
| C | 0.442532  | 0.742203  | -1.080251 |
| H | 0.004717  | 1.629922  | -1.540388 |
| H | 0.710710  | 0.029809  | -1.862427 |
| O | -3.770974 | 2.073690  | -0.115605 |
| H | -3.902677 | 3.010490  | 0.053743  |

**TS-(3+2)-6c**

|   |           |           |           |
|---|-----------|-----------|-----------|
| C | 2.850695  | -0.556001 | -0.122259 |
| O | 3.698578  | -0.841260 | -0.931931 |
| C | 1.686008  | -1.417915 | 0.163230  |
| H | 1.833133  | -2.480434 | 0.006501  |
| N | 0.926681  | -1.105885 | 1.231351  |
| N | -0.104732 | -0.699131 | 1.527687  |
| O | 2.794897  | 0.610460  | 0.540171  |
| C | 3.835296  | 1.533341  | 0.210787  |
| H | 3.652649  | 2.413207  | 0.824272  |
| H | 4.811558  | 1.099772  | 0.434962  |
| H | 3.794223  | 1.786136  | -0.850569 |
| C | -3.148767 | 0.462710  | 1.085194  |
| C | -2.711564 | 1.184959  | -0.219364 |
| C | -2.251871 | -0.994491 | -0.628681 |
| C | -2.923828 | -1.041661 | 0.758588  |
| H | -2.553592 | 0.796736  | 1.938562  |
| H | -4.200653 | 0.669371  | 1.302844  |
| H | -2.323516 | -1.553835 | 1.511183  |
| H | -3.879606 | -1.569226 | 0.679557  |
| C | -3.081830 | 0.134745  | -1.287863 |
| H | -2.729538 | 0.398183  | -2.288495 |
| H | -4.153418 | -0.088890 | -1.316123 |
| H | -3.125875 | 2.187620  | -0.337766 |
| H | -2.232215 | -1.951174 | -1.155558 |
| C | -1.197637 | 1.128247  | -0.271768 |
| C | -0.890614 | -0.298550 | -0.573661 |
| C | -0.337422 | 2.125460  | -0.066700 |
| H | 0.735540  | 1.951937  | -0.071253 |

|   |           |           |           |
|---|-----------|-----------|-----------|
| C | 0.217268  | -0.711705 | -1.289386 |
| H | 0.895070  | 0.038037  | -1.689994 |
| H | 0.182824  | -1.646918 | -1.840639 |
| H | -0.682435 | 3.136153  | 0.124649  |

**TS-(3+2)-6c-product**

|   |           |           |           |
|---|-----------|-----------|-----------|
| C | 2.820356  | -0.539202 | -0.164662 |
| O | 3.863312  | -1.064183 | -0.455303 |
| C | 1.470839  | -1.229536 | -0.119496 |
| H | 1.654916  | -2.292305 | -0.290965 |
| N | 0.919397  | -1.091737 | 1.266036  |
| N | -0.218088 | -0.625516 | 1.273184  |
| O | 2.700581  | 0.758410  | 0.158422  |
| C | 3.925435  | 1.494069  | 0.157950  |
| H | 3.661850  | 2.511006  | 0.441669  |
| H | 4.624379  | 1.061081  | 0.875734  |
| H | 4.379068  | 1.473991  | -0.834885 |
| C | -3.479744 | 0.534729  | 0.733402  |
| C | -2.713627 | 1.067423  | -0.502486 |
| C | -2.053550 | -1.092987 | -0.371989 |
| C | -3.028452 | -0.952612 | 0.814421  |
| H | -3.226459 | 1.099473  | 1.632943  |
| H | -4.559017 | 0.614726  | 0.573407  |
| H | -2.556568 | -1.197705 | 1.765961  |
| H | -3.876109 | -1.627882 | 0.668847  |
| C | -2.711735 | -0.173461 | -1.418797 |
| H | -2.113652 | -0.039251 | -2.325401 |
| H | -3.717739 | -0.505314 | -1.692602 |
| H | -3.111520 | 1.994607  | -0.918185 |
| H | -1.861229 | -2.125114 | -0.675771 |
| C | -1.254836 | 1.138884  | -0.118868 |
| C | -0.750789 | -0.307016 | -0.077368 |
| C | -0.509394 | 2.204890  | 0.145799  |
| H | 0.535591  | 2.096992  | 0.426050  |
| C | 0.414321  | -0.612781 | -1.044228 |
| H | 0.778904  | 0.305203  | -1.507153 |
| H | 0.112961  | -1.305937 | -1.832228 |
| H | -0.918621 | 3.208973  | 0.091011  |

**TS-(3+2)-6d**

|   |           |           |           |
|---|-----------|-----------|-----------|
| C | -3.200335 | -0.585576 | 0.323522  |
| O | -3.342599 | 0.487176  | 0.855718  |
| C | -1.972574 | -1.415289 | 0.402137  |
| H | -2.042170 | -2.482435 | 0.230387  |
| N | -1.159217 | -1.026134 | 1.405676  |
| N | -0.294279 | -0.313421 | 1.640706  |
| O | -4.080892 | -1.149696 | -0.514509 |
| C | -5.246288 | -0.360207 | -0.768169 |
| H | -5.846911 | -0.936497 | -1.468636 |
| H | -5.793746 | -0.186129 | 0.159794  |
| H | -4.964826 | 0.602623  | -1.198999 |
| C | 1.732866  | 2.099029  | 1.008368  |
| C | 2.146516  | 1.479247  | -0.359766 |
| C | -0.080760 | 1.855321  | -0.574049 |
| C | 0.229379  | 2.448185  | 0.815467  |
| H | 1.903155  | 1.397598  | 1.828396  |
| H | 2.330094  | 2.993585  | 1.203039  |
| H | -0.416077 | 2.047710  | 1.598721  |

|   |           |           |           |
|---|-----------|-----------|-----------|
| H | 0.081175  | 3.532082  | 0.788534  |
| C | 1.211737  | 2.236962  | -1.328306 |
| H | 1.246395  | 1.850092  | -2.350386 |
| H | 1.400191  | 3.315372  | -1.334175 |
| H | 3.214669  | 1.498063  | -0.553607 |
| H | -1.026927 | 2.186898  | -1.006825 |
| C | 1.533456  | 0.095186  | -0.396103 |
| C | 0.081990  | 0.337597  | -0.561446 |
| C | 2.138063  | -1.104141 | -0.278750 |
| H | 1.527847  | -2.006470 | -0.311396 |
| C | -0.804580 | -0.542564 | -1.158434 |
| H | -0.431455 | -1.490642 | -1.537819 |
| H | -1.666229 | -0.145247 | -1.688591 |
| C | 3.587987  | -1.302377 | -0.101229 |
| O | 4.386723  | -0.393562 | 0.050361  |
| C | 4.054735  | -2.747257 | -0.105617 |
| H | 3.561378  | -3.304952 | 0.696800  |
| H | 3.784215  | -3.229705 | -1.050141 |
| H | 5.134690  | -2.781112 | 0.031927  |

**TS-(3+2)-6d-product**

|   |           |           |           |
|---|-----------|-----------|-----------|
| C | -3.211650 | -0.409878 | -0.303015 |
| O | -3.318713 | 0.741076  | -0.649677 |
| C | -1.898079 | -1.175280 | -0.254474 |
| H | -2.096467 | -2.231959 | -0.444140 |
| N | -1.416874 | -1.056206 | 1.168979  |
| N | -0.419775 | -0.341406 | 1.253954  |
| O | -4.225758 | -1.160109 | 0.129067  |
| C | -5.484641 | -0.485724 | 0.205191  |
| H | -6.193013 | -1.222159 | 0.578216  |
| H | -5.415136 | 0.364517  | 0.886004  |
| H | -5.781329 | -0.127010 | -0.782179 |
| C | 2.093512  | 2.156369  | 0.859264  |
| C | 2.109086  | 1.407003  | -0.499851 |
| C | -0.102994 | 1.745885  | -0.107743 |
| C | 0.575174  | 2.372539  | 1.128755  |
| H | 2.592344  | 1.578251  | 1.639423  |
| H | 2.621006  | 3.108702  | 0.755554  |
| H | 0.242930  | 1.908619  | 2.058295  |
| H | 0.332032  | 3.437234  | 1.176596  |
| C | 0.914866  | 2.069861  | -1.215263 |
| H | 0.676465  | 1.614897  | -2.181336 |
| H | 1.056454  | 3.145976  | -1.351651 |
| H | 3.075301  | 1.402231  | -0.996550 |
| H | -1.138092 | 2.049171  | -0.275083 |
| C | 1.555076  | 0.038304  | -0.196592 |
| C | 0.042992  | 0.204476  | -0.051382 |
| C | 2.185467  | -1.125194 | 0.003009  |
| H | 1.598267  | -2.008564 | 0.253042  |
| C | -0.798981 | -0.548841 | -1.102013 |
| H | -0.204612 | -1.318165 | -1.598363 |
| H | -1.207089 | 0.131495  | -1.851091 |
| C | 3.658824  | -1.296252 | -0.070458 |
| O | 4.425186  | -0.363304 | -0.218595 |
| C | 4.164470  | -2.716909 | 0.067189  |
| H | 3.850111  | -3.133022 | 1.029612  |
| H | 3.731781  | -3.348735 | -0.714913 |
| H | 5.251139  | -2.727661 | -0.004037 |

**TS-(3+2)-6e**

|   |           |           |           |
|---|-----------|-----------|-----------|
| C | -3.205457 | -0.556504 | 0.321251  |
| O | -3.335784 | 0.517063  | 0.854857  |
| C | -1.986032 | -1.399234 | 0.398171  |
| H | -2.066674 | -2.465480 | 0.225237  |
| N | -1.169983 | -1.020984 | 1.403850  |
| N | -0.296322 | -0.321190 | 1.643220  |
| O | -4.092076 | -1.110375 | -0.516730 |
| C | -5.249883 | -0.309130 | -0.768583 |
| H | -5.856592 | -0.878705 | -1.469264 |
| H | -5.794840 | -0.130886 | 0.160051  |
| H | -4.959233 | 0.651374  | -1.198487 |
| C | 1.766212  | 2.052493  | 1.017768  |
| C | 2.175484  | 1.428086  | -0.349490 |
| C | -0.043303 | 1.846296  | -0.573690 |
| C | 0.271025  | 2.431716  | 0.817939  |
| H | 1.917878  | 1.346255  | 1.837350  |
| H | 2.380050  | 2.934577  | 1.217525  |
| H | -0.385781 | 2.042573  | 1.597421  |
| H | 0.144398  | 3.518348  | 0.792055  |
| C | 1.259860  | 2.204789  | -1.321512 |
| H | 1.292357  | 1.818658  | -2.343866 |
| H | 1.469202  | 3.279304  | -1.324572 |
| H | 3.244889  | 1.428298  | -0.539837 |
| H | -0.980783 | 2.196174  | -1.010813 |
| C | 1.535777  | 0.056551  | -0.395480 |
| C | 0.090387  | 0.325693  | -0.561485 |
| C | 2.112955  | -1.154859 | -0.286231 |
| H | 1.510444  | -2.058196 | -0.317747 |
| C | -0.810091 | -0.540644 | -1.158123 |
| H | -0.450832 | -1.493256 | -1.539454 |
| H | -1.664960 | -0.129067 | -1.688401 |
| C | 3.553928  | -1.353265 | -0.111674 |
| O | 4.410252  | -0.503619 | 0.018542  |
| O | 3.868986  | -2.671438 | -0.097743 |
| H | 4.828417  | -2.709733 | 0.028732  |

**TS-(3+2)-6e-product**

|   |           |           |           |
|---|-----------|-----------|-----------|
| C | -3.209120 | -0.391020 | -0.305208 |
| O | -3.296833 | 0.755473  | -0.671857 |
| C | -1.907229 | -1.174759 | -0.236178 |
| H | -2.119563 | -2.231487 | -0.409549 |
| N | -1.431806 | -1.039421 | 1.187370  |
| N | -0.424630 | -0.338426 | 1.266647  |
| O | -4.236571 | -1.118712 | 0.132980  |
| C | -5.486043 | -0.425074 | 0.189459  |
| H | -6.207244 | -1.144790 | 0.570391  |
| H | -5.408420 | 0.435563  | 0.856171  |
| H | -5.771280 | -0.079151 | -0.805809 |
| C | 2.108421  | 2.122556  | 0.861485  |
| C | 2.132097  | 1.359273  | -0.489819 |
| C | -0.080630 | 1.724182  | -0.124853 |
| C | 0.590120  | 2.361630  | 1.109775  |
| H | 2.589060  | 1.546149  | 1.654327  |
| H | 2.650194  | 3.066440  | 0.754907  |
| H | 0.241587  | 1.916729  | 2.042533  |
| H | 0.360013  | 3.429901  | 1.137731  |

|   |           |           |           |
|---|-----------|-----------|-----------|
| C | 0.951532  | 2.024361  | -1.225985 |
| H | 0.719025  | 1.559153  | -2.188556 |
| H | 1.105328  | 3.097155  | -1.374365 |
| H | 3.103201  | 1.340288  | -0.977309 |
| H | -1.111084 | 2.034343  | -0.307119 |
| C | 1.560267  | -0.000798 | -0.182320 |
| C | 0.050034  | 0.182122  | -0.045238 |
| C | 2.172381  | -1.171538 | 0.019210  |
| H | 1.600690  | -2.060106 | 0.273098  |
| C | -0.794278 | -0.578899 | -1.087962 |
| H | -0.207480 | -1.365445 | -1.565898 |
| H | -1.188146 | 0.092989  | -1.852121 |
| C | 3.636400  | -1.332490 | -0.064249 |
| O | 4.453976  | -0.454452 | -0.226343 |
| O | 3.995947  | -2.625475 | 0.075385  |
| H | 4.963305  | -2.644762 | 0.023438  |

**TS-(3+2)-6f**

|   |           |           |           |
|---|-----------|-----------|-----------|
| C | 3.017715  | -0.620624 | -0.089278 |
| O | 3.916484  | -0.891546 | -0.844682 |
| C | 1.932304  | -1.571996 | 0.246457  |
| H | 2.192707  | -2.622335 | 0.174227  |
| N | 1.149192  | -1.264487 | 1.300947  |
| N | 0.090862  | -0.945035 | 1.597650  |
| O | 2.814626  | 0.587569  | 0.456559  |
| C | 3.778811  | 1.581653  | 0.090762  |
| H | 3.475139  | 2.489005  | 0.608354  |
| H | 4.776565  | 1.270553  | 0.404318  |
| H | 3.774110  | 1.730540  | -0.990491 |
| C | -3.047619 | -0.175098 | 1.041117  |
| C | -2.688752 | 0.505511  | -0.311814 |
| C | -2.007818 | -1.639290 | -0.583388 |
| C | -2.671895 | -1.666431 | 0.809088  |
| H | -2.495550 | 0.273880  | 1.870248  |
| H | -4.115114 | -0.057859 | 1.244633  |
| H | -2.021252 | -2.066017 | 1.587808  |
| H | -3.568534 | -2.292330 | 0.771682  |
| C | -2.946084 | -0.644668 | -1.309119 |
| H | -2.623253 | -0.411934 | -2.326930 |
| H | -3.990461 | -0.971803 | -1.315206 |
| H | -3.193817 | 1.456100  | -0.486085 |
| H | -1.885235 | -2.619195 | -1.049370 |
| C | -1.180777 | 0.585238  | -0.358776 |
| C | -0.726836 | -0.803539 | -0.570241 |
| C | -0.410452 | 1.677288  | -0.200658 |
| H | 0.673344  | 1.604709  | -0.183034 |
| C | 0.443319  | -1.139228 | -1.231168 |
| H | 1.033727  | -0.345718 | -1.683526 |
| H | 0.512506  | -2.101971 | -1.729233 |
| C | -0.981933 | 2.974181  | -0.022305 |
| N | -1.447720 | 4.026407  | 0.121908  |

**TS-(3+2)-6f-product**

|   |          |           |           |
|---|----------|-----------|-----------|
| C | 3.008033 | -0.511762 | -0.155347 |
| O | 4.125446 | -0.860352 | -0.428685 |
| C | 1.794943 | -1.422693 | -0.091765 |
| H | 2.159027 | -2.441667 | -0.237121 |
| N | 1.225938 | -1.343644 | 1.288475  |



|   |           |           |           |
|---|-----------|-----------|-----------|
| N | 0.036040  | -1.035523 | 1.292663  |
| O | 2.664299  | 0.755202  | 0.127198  |
| C | 3.744264  | 1.694195  | 0.101873  |
| H | 3.304982  | 2.659606  | 0.344856  |
| H | 4.499254  | 1.415472  | 0.838715  |
| H | 4.202339  | 1.714728  | -0.888493 |
| C | -3.346513 | -0.205145 | 0.682083  |
| C | -2.611897 | 0.351920  | -0.565650 |
| C | -1.752516 | -1.732222 | -0.336618 |
| C | -2.750379 | -1.634496 | 0.835186  |
| H | -3.178787 | 0.421819  | 1.560024  |
| H | -4.422362 | -0.237958 | 0.490066  |
| H | -2.265883 | -1.786616 | 1.799805  |
| H | -3.524646 | -2.397032 | 0.718034  |
| C | -2.474269 | -0.919560 | -1.428785 |
| H | -1.878366 | -0.768072 | -2.333855 |
| H | -3.442526 | -1.348944 | -1.700614 |
| H | -3.080326 | 1.227638  | -1.016324 |
| H | -1.457857 | -2.751787 | -0.595734 |
| C | -1.184629 | 0.562871  | -0.139305 |
| C | -0.533575 | -0.816273 | -0.063564 |
| C | -0.558042 | 1.702602  | 0.168522  |
| H | 0.478023  | 1.702682  | 0.496799  |
| C | 0.652032  | -1.018521 | -1.034087 |
| H | 0.882817  | -0.097311 | -1.570916 |
| H | 0.438452  | -1.801828 | -1.763899 |
| C | -1.227712 | 2.965906  | 0.073400  |
| N | -1.774914 | 3.983383  | -0.010438 |

**TS-(3+2)-7a**

|   |           |           |           |
|---|-----------|-----------|-----------|
| C | -2.910157 | -1.002902 | -0.091610 |
| O | -3.444993 | -1.734006 | -0.887444 |
| C | -1.445047 | -1.003811 | 0.136263  |
| H | -0.951634 | -1.963116 | 0.012227  |
| N | -0.998931 | -0.320026 | 1.220006  |
| N | -0.382128 | 0.567837  | 1.582640  |
| O | -3.532891 | -0.042307 | 0.604236  |
| C | -4.935871 | 0.062397  | 0.348700  |
| H | -5.292590 | 0.867004  | 0.988014  |
| H | -5.112034 | 0.295581  | -0.703071 |
| H | -5.435884 | -0.876713 | 0.592170  |
| C | 0.246588  | 1.011651  | -0.813632 |
| C | 1.576864  | 0.476622  | -0.466532 |
| C | 2.532211  | 1.428386  | 0.088478  |
| C | 2.237214  | 2.740754  | 0.219833  |
| C | 0.949724  | 3.268556  | -0.169805 |
| C | 0.005627  | 2.430959  | -0.653263 |
| H | 3.515529  | 1.047230  | 0.342927  |
| H | 2.988069  | 3.422932  | 0.607413  |
| H | 0.751981  | 4.330169  | -0.071834 |
| H | -0.969734 | 2.807029  | -0.953231 |
| C | -0.742887 | 0.196120  | -1.374673 |
| C | 1.887056  | -0.843002 | -0.559979 |
| H | -0.464824 | -0.668954 | -1.969042 |
| H | 1.202514  | -1.555024 | -1.029539 |
| H | -1.656828 | 0.682404  | -1.709763 |
| N | 3.084452  | -1.386648 | -0.031189 |
| C | 3.494414  | -2.593129 | -0.724339 |

|   |          |           |           |
|---|----------|-----------|-----------|
| H | 2.763317 | -3.415422 | -0.610677 |
| H | 3.613945 | -2.382833 | -1.789263 |
| H | 4.454539 | -2.936457 | -0.329693 |
| C | 3.016993 | -1.595214 | 1.412377  |
| H | 3.999026 | -1.904258 | 1.783437  |
| H | 2.736720 | -0.660997 | 1.904006  |
| H | 2.280825 | -2.370529 | 1.690478  |

**TS-(3+2)-7a-product**

|   |           |           |           |
|---|-----------|-----------|-----------|
| C | -3.131075 | -1.004696 | -0.252739 |
| O | -3.993065 | -1.752258 | -0.634379 |
| C | -1.641601 | -1.295418 | -0.280174 |
| H | -1.532906 | -2.324696 | -0.626734 |
| N | -1.131858 | -1.230635 | 1.126713  |
| N | -0.295057 | -0.347203 | 1.291653  |
| O | -3.369313 | 0.217538  | 0.249126  |
| C | -4.750053 | 0.578612  | 0.322141  |
| H | -4.774293 | 1.578064  | 0.751709  |
| H | -5.195636 | 0.574224  | -0.674508 |
| H | -5.290337 | -0.127531 | 0.955050  |
| C | 0.010306  | 0.448886  | 0.044790  |
| C | 1.513818  | 0.415500  | -0.192985 |
| C | 2.191985  | 1.644325  | -0.577885 |
| C | 1.587535  | 2.842394  | -0.490271 |
| C | 0.224046  | 2.940299  | 0.024702  |
| C | -0.502989 | 1.849724  | 0.288746  |
| H | 3.200122  | 1.549442  | -0.971161 |
| H | 2.098329  | 3.745961  | -0.805304 |
| H | -0.207817 | 3.925337  | 0.174189  |
| H | -1.526557 | 1.914354  | 0.646225  |
| C | -0.815044 | -0.268318 | -1.061689 |
| C | 2.169150  | -0.759348 | -0.077280 |
| H | -0.146015 | -0.756952 | -1.771202 |
| H | 1.596895  | -1.672401 | 0.111499  |
| H | -1.440412 | 0.441737  | -1.605636 |
| N | 3.553893  | -0.922135 | -0.178908 |
| C | 3.973895  | -2.300148 | -0.365848 |
| H | 3.824630  | -2.911016 | 0.540035  |
| H | 3.417447  | -2.750320 | -1.190124 |
| H | 5.036179  | -2.322380 | -0.621983 |
| C | 4.368770  | -0.240873 | 0.825416  |
| H | 5.398682  | -0.164661 | 0.464852  |
| H | 3.986428  | 0.762359  | 1.007168  |
| H | 4.372987  | -0.789597 | 1.780205  |

**TS-(3+2)-7b**

|   |           |           |           |
|---|-----------|-----------|-----------|
| C | 2.728489  | -0.046650 | 0.378977  |
| O | 3.073754  | -1.113215 | 0.821590  |
| C | 1.401511  | 0.584483  | 0.571114  |
| H | 1.358555  | 1.669174  | 0.595778  |
| N | 0.643260  | -0.002730 | 1.530843  |
| N | -0.309648 | -0.606697 | 1.710504  |
| O | 3.463983  | 0.711836  | -0.449509 |
| C | 4.726585  | 0.144712  | -0.806156 |
| H | 5.192910  | 0.860089  | -1.480380 |
| H | 5.339811  | -0.004315 | 0.084435  |
| H | 4.583580  | -0.817587 | -1.301506 |
| C | -0.913788 | -0.421063 | -0.675326 |

|   |           |           |           |
|---|-----------|-----------|-----------|
| C | -1.960492 | 0.561569  | -0.328765 |
| C | -3.264264 | 0.034512  | 0.060372  |
| C | -3.530804 | -1.287293 | 0.018421  |
| C | -2.530867 | -2.245157 | -0.408408 |
| C | -1.287948 | -1.823908 | -0.721633 |
| H | -4.020119 | 0.747806  | 0.368984  |
| H | -4.514898 | -1.647365 | 0.302287  |
| H | -2.787093 | -3.297479 | -0.462781 |
| H | -0.522109 | -2.530852 | -1.031414 |
| C | 0.352760  | -0.022855 | -1.114161 |
| C | -1.724776 | 1.892116  | -0.293341 |
| H | 0.486657  | 0.940558  | -1.597400 |
| H | -0.770035 | 2.329729  | -0.572584 |
| H | 1.014647  | -0.799460 | -1.490872 |
| O | -2.694765 | 2.767258  | 0.114661  |
| H | -2.419398 | 3.665869  | -0.084469 |

|   |           |           |           |
|---|-----------|-----------|-----------|
| H | 4.296384  | -1.086108 | -1.288947 |
| C | -1.131547 | -0.069262 | -0.697902 |
| C | -2.035223 | 1.024478  | -0.286004 |
| C | -3.382613 | 0.616720  | 0.104211  |
| C | -3.798777 | -0.665391 | 0.026078  |
| C | -2.922923 | -1.717443 | -0.439392 |
| C | -1.645306 | -1.422075 | -0.765340 |
| H | -4.057730 | 1.395142  | 0.448727  |
| H | -4.814298 | -0.918838 | 0.315622  |
| H | -3.294791 | -2.733221 | -0.511539 |
| H | -0.964671 | -2.198511 | -1.106669 |
| C | 0.171064  | 0.209699  | -1.122558 |
| C | -1.653159 | 2.319842  | -0.194771 |
| H | 0.395515  | 1.173719  | -1.569334 |
| H | -0.667463 | 2.665923  | -0.484817 |
| H | 0.752576  | -0.615621 | -1.528592 |
| H | -2.351987 | 3.074547  | 0.147639  |

**TS-(3+2)-7b-product**

|   |           |           |           |
|---|-----------|-----------|-----------|
| C | 2.608567  | 0.011401  | -0.288758 |
| O | 2.581173  | -1.190604 | -0.390988 |
| C | 1.383309  | 0.909470  | -0.345154 |
| H | 1.690464  | 1.898066  | -0.692747 |
| N | 0.931790  | 1.062149  | 1.086270  |
| N | -0.144036 | 0.509199  | 1.296119  |
| O | 3.718302  | 0.717793  | -0.064385 |
| C | 4.904776  | -0.063066 | 0.100215  |
| H | 5.706015  | 0.649815  | 0.282570  |
| H | 4.792443  | -0.744170 | 0.945656  |
| H | 5.101743  | -0.646104 | -0.801414 |
| C | -0.741709 | -0.159068 | 0.073661  |
| C | -2.181618 | 0.312817  | -0.064592 |
| C | -3.263546 | -0.653805 | -0.179477 |
| C | -3.038950 | -1.971756 | -0.047871 |
| C | -1.690130 | -2.469525 | 0.210339  |
| C | -0.636371 | -1.650507 | 0.288198  |
| H | -4.260871 | -0.264110 | -0.352763 |
| H | -3.855806 | -2.681406 | -0.121501 |
| H | -1.545425 | -3.538934 | 0.330921  |
| H | 0.370203  | -2.025101 | 0.451038  |
| C | 0.197971  | 0.295537  | -1.076871 |
| C | -2.429027 | 1.632828  | -0.046549 |
| H | -0.306383 | 1.034476  | -1.701712 |
| H | -1.627757 | 2.359301  | 0.083321  |
| H | 0.498201  | -0.550034 | -1.697061 |
| O | -3.684773 | 2.130367  | -0.181330 |
| H | -3.674370 | 3.082355  | -0.048257 |

**TS-(3+2)-7c-product**

|   |           |           |           |
|---|-----------|-----------|-----------|
| C | 2.344729  | -0.123142 | -0.270468 |
| O | 2.166586  | -1.311440 | -0.384661 |
| C | 1.239775  | 0.920147  | -0.327623 |
| H | 1.668802  | 1.871062  | -0.650191 |
| N | 0.783532  | 1.096583  | 1.095853  |
| N | -0.358087 | 0.683721  | 1.275852  |
| O | 3.531386  | 0.436189  | -0.031511 |
| C | 4.610415  | -0.487928 | 0.133120  |
| H | 5.492811  | 0.118335  | 0.325863  |
| H | 4.408277  | -1.155899 | 0.972302  |
| H | 4.738763  | -1.083811 | -0.772435 |
| C | -1.007719 | 0.123365  | 0.026747  |
| C | -2.359218 | 0.816688  | -0.128307 |
| C | -3.570981 | 0.002144  | -0.160346 |
| C | -3.535762 | -1.329893 | -0.000002 |
| C | -2.266589 | -2.027281 | 0.199870  |
| C | -1.103850 | -1.369911 | 0.222731  |
| H | -4.512793 | 0.523630  | -0.306337 |
| H | -4.452846 | -1.909440 | -0.016658 |
| H | -2.280182 | -3.106235 | 0.318078  |
| H | -0.154143 | -1.883606 | 0.344457  |
| C | 0.004005  | 0.467004  | -1.096255 |
| C | -2.420833 | 2.152831  | -0.200368 |
| H | -0.386149 | 1.268815  | -1.724320 |
| H | -1.529823 | 2.772114  | -0.145681 |
| H | 0.214075  | -0.404605 | -1.717497 |
| H | -3.372525 | 2.665373  | -0.294731 |

**TS-(3+2)-7c**

|   |           |           |           |
|---|-----------|-----------|-----------|
| C | 2.515942  | -0.124841 | 0.374850  |
| O | 2.732977  | -1.224603 | 0.817242  |
| C | 1.264422  | 0.650807  | 0.559456  |
| H | 1.334684  | 1.733698  | 0.597667  |
| N | 0.439787  | 0.144675  | 1.510595  |
| N | -0.569821 | -0.330933 | 1.728049  |
| O | 3.337717  | 0.550901  | -0.440365 |
| C | 4.536862  | -0.147444 | -0.786220 |
| H | 5.084778  | 0.517316  | -1.450522 |
| H | 5.119231  | -0.365165 | 0.110805  |

**TS-(3+2)-7d**

|   |           |           |           |
|---|-----------|-----------|-----------|
| C | -2.874612 | -1.010545 | -0.047002 |
| O | -3.421994 | -1.775956 | -0.797699 |
| C | -1.404238 | -1.029071 | 0.176983  |
| H | -0.925513 | -2.001063 | 0.112147  |
| N | -0.956344 | -0.308008 | 1.236542  |
| N | -0.371517 | 0.537137  | 1.699420  |
| O | -3.467882 | -0.001157 | 0.599110  |
| C | -4.873997 | 0.121669  | 0.353866  |
| H | -5.203636 | 0.966996  | 0.953381  |
| H | -5.055627 | 0.302577  | -0.706946 |

|   |           |           |           |
|---|-----------|-----------|-----------|
| H | -5.389051 | -0.792230 | 0.653895  |
| C | 0.286134  | 0.937270  | -0.854176 |
| C | 1.580346  | 0.436558  | -0.385274 |
| C | 2.474827  | 1.431873  | 0.171179  |
| C | 2.138327  | 2.749693  | 0.207402  |
| C | 0.878831  | 3.231441  | -0.272452 |
| C | -0.020383 | 2.338513  | -0.760624 |
| H | 3.429049  | 1.087511  | 0.545109  |
| H | 2.848519  | 3.461351  | 0.618682  |
| H | 0.648467  | 4.290020  | -0.231932 |
| H | -0.991225 | 2.668423  | -1.123332 |
| C | -0.684912 | 0.058944  | -1.365326 |
| C | 1.883315  | -0.913017 | -0.417569 |
| H | -0.381829 | -0.832916 | -1.905111 |
| H | 1.189239  | -1.595672 | -0.899248 |
| H | -1.602630 | 0.505536  | -1.743696 |
| C | 3.100141  | -1.544586 | 0.075834  |
| O | 4.013899  | -0.974604 | 0.661681  |
| C | 3.196840  | -3.044165 | -0.180085 |
| H | 2.324154  | -3.566441 | 0.224835  |
| H | 3.225605  | -3.243069 | -1.256163 |
| H | 4.103601  | -3.428659 | 0.285382  |

**TS-(3+2)-7d-product**

|   |           |           |           |
|---|-----------|-----------|-----------|
| C | -3.017099 | -1.045424 | -0.309170 |
| O | -3.827059 | -1.839608 | -0.707462 |
| C | -1.518663 | -1.285543 | -0.231493 |
| H | -1.353377 | -2.321663 | -0.532267 |
| N | -1.104183 | -1.152904 | 1.196752  |
| N | -0.299667 | -0.244917 | 1.383520  |
| O | -3.323087 | 0.188466  | 0.121084  |
| C | -4.718210 | 0.503805  | 0.100264  |
| H | -4.799661 | 1.518782  | 0.483520  |
| H | -5.104133 | 0.441510  | -0.918898 |
| H | -5.269500 | -0.194015 | 0.732609  |
| C | 0.062903  | 0.511340  | 0.126021  |
| C | 1.584035  | 0.459794  | -0.030465 |
| C | 2.296314  | 1.705414  | -0.280000 |
| C | 1.662170  | 2.891692  | -0.215202 |
| C | 0.241349  | 2.994426  | 0.099172  |
| C | -0.501600 | 1.899235  | 0.278645  |
| H | 3.355033  | 1.639016  | -0.489150 |
| H | 2.220332  | 3.806961  | -0.385401 |
| H | -0.206542 | 3.979631  | 0.179729  |
| H | -1.563454 | 1.946844  | 0.501896  |
| C | -0.676009 | -0.259524 | -1.003212 |
| C | 2.180861  | -0.751424 | 0.064138  |
| H | 0.039198  | -0.752492 | -1.661899 |
| H | 1.556317  | -1.614676 | 0.290669  |
| H | -1.292783 | 0.414471  | -1.599911 |
| C | 3.627728  | -1.050133 | -0.074162 |
| O | 4.471657  | -0.224512 | -0.370666 |
| C | 4.008823  | -2.493954 | 0.183320  |
| H | 3.715606  | -2.784273 | 1.197052  |
| H | 3.478184  | -3.154888 | -0.509335 |
| H | 5.084022  | -2.613463 | 0.058701  |

**TS-(3+2)-7e**

|   |           |           |           |
|---|-----------|-----------|-----------|
| C | -2.972384 | -0.277790 | 0.397806  |
| O | -3.491316 | 0.625209  | 1.002699  |
| C | -1.523245 | -0.616355 | 0.436481  |
| H | -1.229554 | -1.657831 | 0.343561  |
| N | -0.858102 | 0.013408  | 1.438325  |
| N | -0.095501 | 0.734577  | 1.844018  |
| O | -3.585636 | -1.080127 | -0.476662 |
| C | -4.974587 | -0.793234 | -0.678024 |
| H | -5.320892 | -1.518195 | -1.410970 |
| H | -5.519704 | -0.899237 | 0.261260  |
| H | -5.098470 | 0.225401  | -1.049691 |
| C | 0.395693  | 1.003709  | -0.784243 |
| C | 1.609878  | 0.267731  | -0.429692 |
| C | 2.731365  | 1.074209  | 0.006746  |
| C | 2.656071  | 2.432075  | 0.045158  |
| C | 1.467814  | 3.143740  | -0.315093 |
| C | 0.370372  | 2.437166  | -0.690869 |
| H | 3.639215  | 0.558288  | 0.288788  |
| H | 3.527258  | 2.996469  | 0.365218  |
| H | 1.447428  | 4.226743  | -0.274465 |
| H | -0.552642 | 2.944953  | -0.960680 |
| C | -0.765995 | 0.320023  | -1.183425 |
| C | 1.632172  | -1.113430 | -0.450255 |
| H | -0.682514 | -0.611984 | -1.734414 |
| H | 0.786434  | -1.672913 | -0.829393 |
| H | -1.617289 | 0.930187  | -1.479914 |
| C | 2.751800  | -1.942362 | -0.052374 |
| O | 3.838010  | -1.609006 | 0.388303  |
| O | 2.459583  | -3.265580 | -0.212013 |
| H | 3.257089  | -3.734631 | 0.072383  |

**TS-(3+2)-7e-product**

|   |           |           |           |
|---|-----------|-----------|-----------|
| C | -3.049960 | -0.314899 | -0.288991 |
| O | -3.263553 | 0.864520  | -0.430673 |
| C | -1.661349 | -0.937914 | -0.282541 |
| H | -1.741857 | -1.985330 | -0.580574 |
| N | -1.220077 | -0.914875 | 1.152553  |
| N | -0.281410 | -0.148393 | 1.345332  |
| O | -3.994848 | -1.228393 | -0.072783 |
| C | -5.324048 | -0.708586 | 0.031090  |
| H | -5.964321 | -1.568588 | 0.214114  |
| H | -5.384944 | 0.003149  | 0.856166  |
| H | -5.605052 | -0.204762 | -0.895525 |
| C | 0.186899  | 0.562826  | 0.090891  |
| C | 1.696114  | 0.344275  | -0.019950 |
| C | 2.564278  | 1.507380  | -0.132977 |
| C | 2.065926  | 2.754617  | -0.037410 |
| C | 0.643996  | 3.009693  | 0.162563  |
| C | -0.230785 | 2.003040  | 0.234317  |
| H | 3.622337  | 1.330389  | -0.270794 |
| H | 2.737424  | 3.604683  | -0.106966 |
| H | 0.302429  | 4.036942  | 0.236832  |
| H | -1.298354 | 2.167851  | 0.349878  |
| C | -0.618639 | -0.123390 | -1.043378 |
| C | 2.135622  | -0.933672 | 0.010463  |
| H | 0.030452  | -0.769250 | -1.635605 |
| H | 1.424787  | -1.746126 | 0.131857  |
| H | -1.085044 | 0.614185  | -1.697579 |

|                            |           |           |           |                             |           |           |           |
|----------------------------|-----------|-----------|-----------|-----------------------------|-----------|-----------|-----------|
| C                          | 3.541948  | -1.362405 | -0.085425 | C                           | -2.342228 | 1.354417  | 0.027270  |
| O                          | 4.525956  | -0.669464 | -0.224625 | H                           | -0.230001 | 0.956678  | -1.645972 |
| O                          | 3.632088  | -2.707560 | -0.003263 | H                           | -1.596599 | 2.128332  | 0.184093  |
| H                          | 4.575392  | -2.918894 | -0.068158 | H                           | 0.721418  | -0.545022 | -1.690181 |
| <b>TS-(3+2)-7f</b>         |           |           |           | C                           | -3.695185 | 1.794881  | -0.102079 |
| C                          | 2.795362  | 0.155766  | 0.385381  | N                           | -4.793372 | 2.146967  | -0.216140 |
| O                          | 3.197731  | -0.800168 | 0.996970  | <b>TS-(3+2)-7ba</b>         |           |           |           |
| C                          | 1.398688  | 0.673155  | 0.422755  | C                           | 1.670086  | -0.200606 | -0.879744 |
| H                          | 1.245172  | 1.743543  | 0.321099  | C                           | 1.446963  | -0.980916 | 0.359398  |
| N                          | 0.664286  | 0.146308  | 1.436845  | C                           | 2.648104  | -1.265981 | 1.140552  |
| N                          | -0.186120 | -0.475252 | 1.836033  | C                           | 3.889123  | -1.121263 | 0.624286  |
| O                          | 3.500849  | 0.867866  | -0.497070 | C                           | 4.087377  | -0.622094 | -0.714110 |
| C                          | 4.843210  | 0.408626  | -0.698960 | C                           | 3.021654  | -0.171524 | -1.412767 |
| H                          | 5.274435  | 1.078404  | -1.439242 | H                           | 2.510793  | -1.673573 | 2.134352  |
| H                          | 5.399974  | 0.454697  | 0.238264  | H                           | 4.753257  | -1.402016 | 1.218564  |
| H                          | 4.837919  | -0.620753 | -1.061391 | H                           | 5.085964  | -0.581773 | -1.135464 |
| C                          | -0.707289 | -0.714886 | -0.769070 | H                           | 3.154106  | 0.257450  | -2.403735 |
| C                          | -1.820041 | 0.172847  | -0.442569 | C                           | 0.673625  | 0.482808  | -1.595623 |
| C                          | -3.033498 | -0.466714 | 0.020431  | C                           | 0.241303  | -1.373218 | 0.865745  |
| C                          | -3.141038 | -1.818228 | 0.097065  | H                           | -0.372923 | 0.224416  | -1.497844 |
| C                          | -2.053493 | -2.685318 | -0.251897 | C                           | -1.005622 | 2.394553  | -0.295039 |
| C                          | -0.874685 | -2.137930 | -0.644158 | O                           | -1.930050 | 2.585581  | -1.045632 |
| H                          | -3.869749 | 0.170694  | 0.289691  | C                           | 0.400093  | 2.327686  | -0.776884 |
| H                          | -4.075372 | -2.256286 | 0.434999  | H                           | 0.612289  | 3.005113  | -1.597787 |
| H                          | -2.174540 | -3.760268 | -0.186664 | N                           | 1.371335  | 2.338599  | 0.175012  |
| H                          | -0.027405 | -2.769186 | -0.900882 | N                           | 2.218122  | 1.737255  | 0.648611  |
| C                          | 0.528614  | -0.186736 | -1.178741 | O                           | -1.120337 | 2.156194  | 1.016285  |
| C                          | -1.703016 | 1.545042  | -0.497915 | C                           | -2.459589 | 2.229473  | 1.513351  |
| H                          | 0.556427  | 0.737673  | -1.748731 | H                           | -2.397982 | 1.952633  | 2.564225  |
| H                          | -0.817624 | 2.033038  | -0.885828 | H                           | -2.842228 | 3.246831  | 1.405957  |
| H                          | 1.297051  | -0.901197 | -1.467984 | H                           | -3.104267 | 1.542263  | 0.963711  |
| C                          | -2.762770 | 2.405127  | -0.112596 | H                           | 0.944853  | 0.810901  | -2.596419 |
| N                          | -3.628907 | 3.106593  | 0.216994  | O                           | 0.203001  | -1.747955 | 2.195014  |
| <b>TS-(3+2)-7f-product</b> |           |           |           | H                           | -0.473491 | -2.428810 | 2.296144  |
| C                          | 2.779896  | 0.170160  | -0.281956 | C                           | -1.064532 | -1.467907 | 0.188977  |
| O                          | 2.847192  | -1.030905 | -0.379096 | C                           | -2.230631 | -1.114504 | 0.881426  |
| C                          | 1.475364  | 0.955211  | -0.300093 | C                           | -1.190238 | -2.023179 | -1.094313 |
| H                          | 1.681512  | 1.976958  | -0.624972 | C                           | -3.483935 | -1.270980 | 0.293325  |
| N                          | 1.029250  | 1.021091  | 1.131522  | H                           | -2.139598 | -0.705069 | 1.883842  |
| N                          | 0.012415  | 0.366462  | 1.340229  | C                           | -2.438853 | -2.175708 | -1.679197 |
| O                          | 3.827481  | 0.970816  | -0.100888 | H                           | -0.290820 | -2.325689 | -1.623038 |
| C                          | 5.086711  | 0.300686  | 0.021266  | C                           | -3.592431 | -1.796182 | -0.989721 |
| H                          | 5.825548  | 1.085146  | 0.168110  | H                           | -4.376435 | -0.982322 | 0.840675  |
| H                          | 5.067689  | -0.379527 | 0.874432  | H                           | -2.518203 | -2.605719 | -2.672495 |
| H                          | 5.299065  | -0.269142 | -0.885033 | H                           | -4.567420 | -1.918914 | -1.449376 |
| C                          | -0.527734 | -0.321702 | 0.102476  | <b>TS-(3+2)-7ba-product</b> |           |           |           |
| C                          | -1.999925 | 0.047656  | -0.021424 | C                           | 1.627700  | 0.846783  | -0.012905 |
| C                          | -2.986315 | -1.008125 | -0.177590 | C                           | 2.115281  | -0.597295 | 0.037052  |
| C                          | -2.637238 | -2.303332 | -0.078918 | C                           | 3.549943  | -0.865824 | 0.016731  |
| C                          | -1.256072 | -2.705054 | 0.169815  | C                           | 4.468383  | 0.112106  | -0.053377 |
| C                          | -0.279586 | -1.798926 | 0.271960  | C                           | 4.052975  | 1.506856  | -0.129555 |
| H                          | -4.017647 | -0.713572 | -0.344267 | C                           | 2.761284  | 1.844240  | -0.109614 |
| H                          | -3.393486 | -3.075360 | -0.176433 | H                           | 3.853785  | -1.904383 | 0.068368  |
| H                          | -1.029345 | -3.762334 | 0.257843  | H                           | 5.526421  | -0.125442 | -0.054099 |
| H                          | 0.758295  | -2.080788 | 0.423390  | H                           | 4.811762  | 2.279497  | -0.209337 |
| C                          | 0.345331  | 0.250412  | -1.045798 | H                           | 2.451542  | 2.885974  | -0.161717 |

|                    |           |           |           |                            |           |           |           |
|--------------------|-----------|-----------|-----------|----------------------------|-----------|-----------|-----------|
| C                  | 0.572635  | 1.158919  | -1.102587 | H                          | 1.502246  | 1.620027  | -1.899088 |
| C                  | 1.268824  | -1.656536 | 0.056135  |                            |           |           |           |
| H                  | 0.139374  | 0.254617  | -1.529628 | <b>TS-[4+2]-1a-product</b> |           |           |           |
| C                  | -1.906956 | 1.458704  | -0.584994 | C                          | -2.127859 | -0.337833 | -0.004531 |
| O                  | -2.229215 | 0.736838  | -1.495233 | O                          | -2.480744 | -1.495473 | 0.003199  |
| C                  | -0.485671 | 1.942082  | -0.336778 | C                          | -0.793320 | 0.212692  | 0.092165  |
| H                  | -0.483661 | 3.018835  | -0.546379 | H                          | -0.666263 | 1.276968  | 0.068915  |
| N                  | -0.136086 | 1.810217  | 1.112835  | N                          | 0.306770  | -0.537828 | 0.207684  |
| N                  | 0.928972  | 1.223767  | 1.284033  | N                          | 0.300182  | -1.812824 | 0.251905  |
| O                  | -2.764502 | 1.983970  | 0.295189  | O                          | -3.017510 | 0.694906  | -0.115347 |
| C                  | -4.130744 | 1.631340  | 0.081698  | C                          | -4.371878 | 0.281274  | -0.217644 |
| H                  | -4.691737 | 2.125445  | 0.872627  | H                          | -4.960480 | 1.194621  | -0.298379 |
| H                  | -4.463176 | 1.974731  | -0.900438 | H                          | -4.521430 | -0.347827 | -1.098718 |
| H                  | -4.252381 | 0.547773  | 0.136102  | H                          | -4.672495 | -0.289228 | 0.664764  |
| H                  | 1.012012  | 1.740721  | -1.913543 | C                          | 2.666736  | -0.464944 | -0.514107 |
| O                  | 1.800436  | -2.911374 | -0.076167 | C                          | 2.666930  | -1.792268 | -0.479270 |
| H                  | 1.131964  | -3.554537 | 0.187145  | C                          | 1.668740  | 0.256306  | 0.343746  |
| C                  | -0.215183 | -1.661314 | 0.152391  | C                          | 1.613839  | -2.444632 | 0.364849  |
| C                  | -0.889058 | -1.164323 | 1.272224  | H                          | 1.895426  | 0.086080  | 1.404270  |
| C                  | -0.947073 | -2.296569 | -0.862070 | H                          | 1.466871  | -3.490909 | 0.092868  |
| C                  | -2.276109 | -1.270339 | 1.356061  | H                          | 1.940691  | -2.440736 | 1.420141  |
| H                  | -0.323864 | -0.712775 | 2.079025  | H                          | 3.365462  | -2.392861 | -1.052806 |
| C                  | -2.328630 | -2.402179 | -0.773766 | H                          | 3.364832  | 0.133007  | -1.089215 |
| H                  | -0.421442 | -2.688008 | -1.728833 | N                          | 1.619112  | 1.642181  | 0.111792  |
| C                  | -2.994928 | -1.889865 | 0.337706  | C                          | 1.230393  | 2.545658  | 1.174666  |
| H                  | -2.789280 | -0.878352 | 2.228546  | H                          | 1.800461  | 3.476508  | 1.082754  |
| H                  | -2.886801 | -2.877424 | -1.573294 | H                          | 0.161155  | 2.803632  | 1.164751  |
| H                  | -4.074522 | -1.980757 | 0.410969  | H                          | 1.462081  | 2.097847  | 2.143598  |
|                    |           |           |           | C                          | 1.400204  | 2.146240  | -1.231200 |
| <b>TS-[4+2]-1a</b> |           |           |           | H                          | 0.356274  | 2.442698  | -1.405080 |
| C                  | -2.318773 | -0.246606 | -0.043681 | H                          | 2.036818  | 3.020401  | -1.407136 |
| O                  | -2.790369 | -1.359012 | 0.065380  | H                          | 1.651467  | 1.378674  | -1.965259 |
| C                  | -0.913646 | 0.093397  | -0.046700 |                            |           |           |           |
| H                  | -0.563693 | 1.109881  | -0.152146 | <b>TS-[4+2]-1b</b>         |           |           |           |
| N                  | -0.021787 | -0.869143 | 0.078425  | C                          | 2.016739  | -0.184624 | 0.024159  |
| N                  | 0.063444  | -2.055860 | 0.163262  | O                          | 2.227476  | -1.378277 | 0.044301  |
| O                  | -3.087261 | 0.870014  | -0.178300 | C                          | 0.713328  | 0.451109  | -0.026180 |
| C                  | -4.484390 | 0.612310  | -0.186865 | H                          | 0.579819  | 1.520852  | -0.064499 |
| H                  | -4.969412 | 1.581349  | -0.301333 | N                          | -0.348300 | -0.324590 | -0.072760 |
| H                  | -4.752618 | -0.048354 | -1.014926 | N                          | -0.670371 | -1.471500 | -0.036632 |
| H                  | -4.797827 | 0.136814  | 0.745831  | O                          | 3.003796  | 0.745221  | 0.048152  |
| C                  | 2.612244  | -0.523668 | -0.612973 | C                          | 4.316021  | 0.199179  | 0.099813  |
| C                  | 2.546034  | -1.906989 | -0.480322 | H                          | 4.995045  | 1.050726  | 0.114862  |
| C                  | 2.025388  | 0.320961  | 0.330448  | H                          | 4.446314  | -0.410120 | 0.997308  |
| C                  | 1.821145  | -2.541618 | 0.535642  | H                          | 4.508510  | -0.428073 | -0.773791 |
| H                  | 1.849757  | -0.040496 | 1.338689  | C                          | -2.876307 | 0.509813  | 0.547102  |
| H                  | 1.759489  | -3.623428 | 0.519211  | C                          | -3.088335 | -0.868106 | 0.491031  |
| H                  | 1.819623  | -2.127483 | 1.539547  | C                          | -2.077606 | 1.145579  | -0.381429 |
| H                  | 2.875054  | -2.505840 | -1.324688 | C                          | -2.476110 | -1.667658 | -0.475268 |
| H                  | 3.001896  | -0.101115 | -1.532934 | H                          | -1.943701 | 0.780146  | -1.392691 |
| N                  | 1.796170  | 1.635357  | 0.167788  | H                          | -2.592251 | -2.742572 | -0.405809 |
| C                  | 1.418207  | 2.478201  | 1.287390  | H                          | -2.364499 | -1.306767 | -1.492954 |
| H                  | 2.243749  | 3.129909  | 1.596503  | H                          | -3.535892 | -1.348040 | 1.355645  |
| H                  | 0.560617  | 3.100836  | 1.016925  | H                          | -3.170664 | 1.059368  | 1.438919  |
| H                  | 1.128483  | 1.849369  | 2.130427  | O                          | -1.631920 | 2.404944  | -0.259490 |
| C                  | 1.963080  | 2.252724  | -1.134069 | H                          | -1.753178 | 2.710255  | 0.649674  |
| H                  | 1.463068  | 3.222265  | -1.133929 |                            |           |           |           |
| H                  | 3.020080  | 2.403513  | -1.384264 | <b>TS-[4+2]-1b-product</b> |           |           |           |

|   |           |           |           |
|---|-----------|-----------|-----------|
| C | 1.877733  | -0.199411 | 0.006458  |
| O | 2.016622  | -1.395900 | 0.119700  |
| C | 0.657849  | 0.566862  | -0.154176 |
| H | 0.706005  | 1.635783  | -0.252492 |
| N | -0.548820 | 0.000064  | -0.239486 |
| N | -0.757613 | -1.262502 | -0.241146 |
| O | 2.932768  | 0.665285  | 0.030944  |
| C | 4.194954  | 0.034060  | 0.193589  |
| H | 4.933882  | 0.834434  | 0.189178  |
| H | 4.235079  | -0.517687 | 1.136092  |
| H | 4.386352  | -0.666970 | -0.622544 |
| C | -2.845787 | 0.485002  | 0.502680  |
| C | -3.076474 | -0.821721 | 0.525631  |
| C | -1.737890 | 0.981916  | -0.373219 |
| C | -2.156835 | -1.678174 | -0.292238 |
| H | -1.996694 | 0.918404  | -1.436060 |
| H | -2.171506 | -2.717071 | 0.040944  |
| H | -2.506671 | -1.683891 | -1.339780 |
| H | -3.862443 | -1.268617 | 1.125495  |
| H | -3.417781 | 1.226881  | 1.050543  |
| O | -1.377317 | 2.289980  | -0.125910 |
| H | -1.219077 | 2.389676  | 0.822826  |

**TS-[4+2]-1c**

|   |           |           |           |
|---|-----------|-----------|-----------|
| C | -1.861641 | -0.080003 | -0.027057 |
| O | -1.953240 | -1.286101 | -0.100802 |
| C | -0.626438 | 0.680617  | 0.048057  |
| H | -0.605108 | 1.754141  | 0.118289  |
| N | 0.506770  | 0.007408  | 0.045770  |
| N | 0.918249  | -1.101546 | -0.062996 |
| O | -2.932476 | 0.749382  | 0.001389  |
| C | -4.187630 | 0.082619  | -0.069594 |
| H | -4.944427 | 0.865264  | -0.042174 |
| H | -4.266255 | -0.494185 | -0.994001 |
| H | -4.310878 | -0.599009 | 0.775187  |
| C | 3.022022  | 0.982742  | -0.440877 |
| C | 3.327325  | -0.383764 | -0.430067 |
| C | 2.122379  | 1.511059  | 0.452747  |
| C | 2.702874  | -1.244433 | 0.472539  |
| H | 1.985298  | 1.092697  | 1.443552  |
| H | 2.855098  | -2.312151 | 0.367331  |
| H | 2.517881  | -0.924541 | 1.493205  |
| H | 3.835472  | -0.809458 | -1.289638 |
| H | 3.319088  | 1.573456  | -1.302569 |
| H | 1.731084  | 2.513475  | 0.312219  |

**TS-[4+2]-1c-product**

|   |           |           |           |
|---|-----------|-----------|-----------|
| C | -1.749992 | -0.091468 | -0.005363 |
| O | -1.823184 | -1.298075 | -0.060735 |
| C | -0.574064 | 0.742195  | 0.121330  |
| H | -0.685998 | 1.811649  | 0.169717  |
| N | 0.670329  | 0.251496  | 0.200818  |
| N | 0.967405  | -0.989744 | 0.137489  |
| O | -2.851127 | 0.713279  | -0.054598 |
| C | -4.078107 | 0.007758  | -0.176222 |
| H | -4.859181 | 0.766472  | -0.207157 |
| H | -4.092120 | -0.592304 | -1.089363 |
| H | -4.228345 | -0.660165 | 0.675577  |

|   |          |           |           |
|---|----------|-----------|-----------|
| C | 2.937725 | 0.949007  | -0.436710 |
| C | 3.274703 | -0.334425 | -0.491570 |
| C | 1.749801 | 1.280879  | 0.410610  |
| C | 2.394634 | -1.287753 | 0.266761  |
| H | 1.992183 | 1.220021  | 1.478725  |
| H | 2.517231 | -2.315380 | -0.076988 |
| H | 2.679305 | -1.277746 | 1.333887  |
| H | 4.101500 | -0.704044 | -1.088637 |
| H | 3.448122 | 1.739132  | -0.974889 |
| H | 1.329461 | 2.261318  | 0.200635  |

**TS-[4+2]-1d**

|   |           |           |           |
|---|-----------|-----------|-----------|
| C | -2.369157 | -0.133974 | -0.068057 |
| O | -2.794930 | -1.262278 | 0.031206  |
| C | -0.957318 | 0.241053  | -0.105667 |
| H | -0.629332 | 1.262030  | -0.211011 |
| N | -0.075010 | -0.721413 | -0.030553 |
| N | 0.020257  | -1.907623 | -0.043140 |
| O | -3.151335 | 0.962651  | -0.148376 |
| C | -4.549543 | 0.688070  | -0.123807 |
| H | -5.044712 | 1.654370  | -0.202440 |
| H | -4.828121 | 0.044130  | -0.960723 |
| H | -4.825810 | 0.188747  | 0.807489  |
| C | 2.693507  | -0.677791 | -0.453886 |
| C | 2.472967  | -2.048561 | -0.293833 |
| C | 2.071232  | 0.256753  | 0.339656  |
| C | 1.557909  | -2.521895 | 0.660588  |
| H | 1.715777  | 0.015102  | 1.336662  |
| H | 1.351121  | -3.585576 | 0.688653  |
| H | 1.495020  | -2.043035 | 1.633556  |
| H | 2.808398  | -2.726929 | -1.071265 |
| H | 3.213244  | -0.310139 | -1.335018 |
| C | 2.118621  | 1.700410  | -0.023649 |
| O | 2.559370  | 2.071104  | -1.092914 |
| C | 1.595173  | 2.668636  | 1.013040  |
| H | 0.612116  | 2.353664  | 1.377731  |
| H | 2.269364  | 2.672005  | 1.876443  |
| H | 1.541015  | 3.670859  | 0.590143  |

**TS-[4+2]-1d-product**

|   |           |           |           |
|---|-----------|-----------|-----------|
| C | -2.121798 | -0.282678 | -0.004471 |
| O | -2.475902 | -1.422732 | 0.189234  |
| C | -0.781017 | 0.268473  | 0.010330  |
| H | -0.651629 | 1.313627  | -0.207977 |
| N | 0.313785  | -0.482112 | 0.191775  |
| N | 0.300564  | -1.748869 | 0.349676  |
| O | -2.999501 | 0.725252  | -0.271535 |
| C | -4.359557 | 0.314311  | -0.311659 |
| H | -4.937175 | 1.210615  | -0.533631 |
| H | -4.512960 | -0.440874 | -1.086230 |
| H | -4.664858 | -0.109873 | 0.647985  |
| C | 2.601408  | -0.491700 | -0.663608 |
| C | 2.604695  | -1.813232 | -0.526966 |
| C | 1.660760  | 0.232960  | 0.247297  |
| C | 1.620988  | -2.372067 | 0.463532  |
| H | 1.955050  | 0.085147  | 1.297122  |
| H | 1.458789  | -3.441283 | 0.326981  |
| H | 2.012252  | -2.239241 | 1.488387  |

|   |          |           |           |
|---|----------|-----------|-----------|
| H | 3.215621 | -2.472746 | -1.133780 |
| H | 3.174571 | 0.078058  | -1.384565 |
| C | 1.577470 | 1.741624  | -0.024350 |
| O | 1.854267 | 2.176068  | -1.115125 |
| C | 1.222417 | 2.620052  | 1.149811  |
| H | 0.423163 | 2.175805  | 1.747877  |
| H | 2.107031 | 2.711991  | 1.790326  |
| H | 0.936597 | 3.610475  | 0.797272  |

**TS-[4+2]-1e**

|   |           |           |           |
|---|-----------|-----------|-----------|
| C | -2.376719 | -0.127066 | -0.088102 |
| O | -2.800616 | -1.255764 | -0.179098 |
| C | -0.959639 | 0.246155  | -0.029445 |
| H | -0.624634 | 1.264937  | 0.089208  |
| N | -0.090118 | -0.721260 | -0.051190 |
| N | 0.050079  | -1.894101 | -0.206310 |
| O | -3.155525 | 0.970084  | -0.019678 |
| C | -4.554631 | 0.700674  | -0.072282 |
| H | -5.047091 | 1.669697  | -0.014705 |
| H | -4.811297 | 0.192868  | -1.004397 |
| H | -4.853548 | 0.066506  | 0.765091  |
| C | 2.731848  | -0.654984 | -0.333785 |
| C | 2.486387  | -2.026617 | -0.223814 |
| C | 2.061453  | 0.277769  | 0.418769  |
| C | 1.488567  | -2.519084 | 0.637827  |
| H | 1.606511  | 0.062582  | 1.377729  |
| H | 1.288328  | -3.584555 | 0.628558  |
| H | 1.343787  | -2.060816 | 1.612487  |
| H | 2.882235  | -2.688023 | -0.986841 |
| H | 3.329007  | -0.282372 | -1.162206 |
| C | 2.143708  | 1.698860  | 0.033448  |
| O | 2.793995  | 2.152706  | -0.878171 |
| O | 1.360275  | 2.472011  | 0.820350  |
| H | 1.456107  | 3.380155  | 0.494655  |

**TS-[4+2]-1e-product**

|   |           |           |           |
|---|-----------|-----------|-----------|
| C | 2.120259  | 0.287490  | -0.021134 |
| O | 2.456296  | 1.449040  | -0.011389 |
| C | 0.789000  | -0.278045 | 0.081813  |
| H | 0.682375  | -1.346898 | 0.071727  |
| N | -0.310499 | 0.471172  | 0.219843  |
| N | -0.304791 | 1.746624  | 0.293591  |
| O | 3.012686  | -0.735462 | -0.144719 |
| C | 4.364384  | -0.313482 | -0.266187 |
| H | 4.955923  | -1.223771 | -0.354705 |
| H | 4.495917  | 0.315260  | -1.150094 |
| H | 4.672022  | 0.258829  | 0.612324  |
| C | -2.632896 | 0.438271  | -0.575498 |
| C | -2.639727 | 1.763640  | -0.503319 |
| C | -1.651359 | -0.253123 | 0.321028  |
| C | -1.618473 | 2.379254  | 0.408638  |
| H | -1.918807 | -0.133652 | 1.378430  |
| H | -1.460700 | 3.436471  | 0.194411  |
| H | -1.971590 | 2.317655  | 1.453501  |
| H | -3.286273 | 2.384819  | -1.113427 |
| H | -3.237827 | -0.162780 | -1.242925 |
| C | -1.563037 | -1.739430 | 0.009971  |
| O | -1.823328 | -2.225467 | -1.057104 |

|   |           |           |          |
|---|-----------|-----------|----------|
| O | -1.203292 | -2.449991 | 1.088427 |
| H | -1.171821 | -3.382931 | 0.823131 |

**TS-[4+2]-1f**

|   |           |           |           |
|---|-----------|-----------|-----------|
| C | 2.140005  | -0.192811 | 0.045553  |
| O | 2.409953  | -1.370929 | 0.080197  |
| C | 0.781846  | 0.362998  | 0.043168  |
| H | 0.578093  | 1.423180  | 0.010103  |
| N | -0.201380 | -0.488072 | 0.064249  |
| N | -0.497363 | -1.632785 | 0.200207  |
| O | 3.052368  | 0.794015  | -0.004475 |
| C | 4.406221  | 0.345149  | -0.002872 |
| H | 5.017565  | 1.244759  | -0.040403 |
| H | 4.617306  | -0.227057 | 0.902905  |
| H | 4.599013  | -0.288845 | -0.870910 |
| C | -2.963050 | -0.001529 | 0.415799  |
| C | -2.935576 | -1.397037 | 0.328584  |
| C | -2.187519 | 0.784348  | -0.406917 |
| C | -2.066186 | -2.051973 | -0.560881 |
| H | -1.840254 | 0.439215  | -1.373763 |
| H | -2.024921 | -3.134557 | -0.526674 |
| H | -1.894919 | -1.646808 | -1.554528 |
| H | -3.393689 | -1.973503 | 1.124440  |
| H | -3.458647 | 0.464027  | 1.262447  |
| C | -1.977628 | 2.172765  | -0.152545 |
| N | -1.742226 | 3.289919  | 0.050012  |

**TS-[4+2]-1f-product**

|   |           |           |           |
|---|-----------|-----------|-----------|
| C | -1.958616 | -0.258335 | -0.002643 |
| O | -2.170286 | -1.448474 | -0.007967 |
| C | -0.686203 | 0.436882  | 0.097579  |
| H | -0.672048 | 1.512511  | 0.090578  |
| N | 0.477964  | -0.208604 | 0.195391  |
| N | 0.609433  | -1.481610 | 0.200132  |
| O | -2.947967 | 0.669213  | -0.093361 |
| C | -4.254904 | 0.118244  | -0.198256 |
| H | -4.933126 | 0.967733  | -0.262151 |
| H | -4.339512 | -0.507678 | -1.089729 |
| H | -4.487658 | -0.493218 | 0.676766  |
| C | 2.816466  | 0.105642  | -0.541699 |
| C | 2.951961  | -1.214804 | -0.534717 |
| C | 1.738740  | 0.640614  | 0.363624  |
| C | 1.979792  | -1.978154 | 0.316627  |
| H | 2.007982  | 0.480653  | 1.416418  |
| H | 1.938983  | -3.032411 | 0.042625  |
| H | 2.308177  | -1.940572 | 1.371099  |
| H | 3.676472  | -1.731543 | -1.154531 |
| H | 3.390396  | 0.797103  | -1.145820 |
| C | 1.514455  | 2.072175  | 0.166187  |
| N | 1.404919  | 3.211345  | 0.013786  |

**TS-[4+2]-2a**

|   |           |           |           |
|---|-----------|-----------|-----------|
| C | -1.522905 | -0.053952 | -0.005050 |
| C | -2.531401 | -1.088906 | -0.052927 |
| O | -2.351575 | -2.277729 | 0.110688  |
| O | -3.759771 | -0.558598 | -0.309865 |
| N | -0.272662 | -0.386525 | 0.241322  |
| N | 0.425387  | -1.337655 | 0.422681  |

|   |           |           |           |
|---|-----------|-----------|-----------|
| H | -1.755834 | 0.988849  | -0.167240 |
| C | -4.802874 | -1.520673 | -0.374067 |
| H | -5.715092 | -0.963446 | -0.585769 |
| H | -4.610451 | -2.250830 | -1.164041 |
| H | -4.895536 | -2.057863 | 0.573135  |
| C | 0.850965  | 1.743947  | 0.454304  |
| C | 1.863124  | 1.264878  | -0.373268 |
| H | 2.053209  | 1.750346  | -1.325711 |
| C | 2.494201  | 0.056158  | -0.094383 |
| C | 3.444229  | -0.650833 | -1.037419 |
| C | 2.139929  | -0.810547 | 0.956001  |
| C | 3.294359  | -2.131691 | -0.643146 |
| H | 4.468305  | -0.300899 | -0.848549 |
| C | 2.938594  | -2.087529 | 0.851984  |
| H | 1.839256  | -0.445515 | 1.933724  |
| H | 2.451350  | -2.564344 | -1.189058 |
| H | 4.185493  | -2.724546 | -0.859319 |
| H | 2.350797  | -2.950377 | 1.176081  |
| H | 3.838384  | -2.028659 | 1.476801  |
| H | 3.222297  | -0.455980 | -2.090866 |
| H | 0.795274  | 1.402879  | 1.483209  |
| N | -0.015504 | 2.726189  | 0.149419  |
| C | -0.868923 | 3.318840  | 1.162272  |
| H | -0.526896 | 4.322409  | 1.441610  |
| H | -1.896740 | 3.387745  | 0.794557  |
| H | -0.867977 | 2.684809  | 2.050141  |
| C | -0.080009 | 3.249857  | -1.201016 |
| H | -0.084139 | 2.418733  | -1.913369 |
| H | -1.004344 | 3.817157  | -1.318656 |
| H | 0.767120  | 3.908792  | -1.426924 |

**TS-[4+2]-2a-product**

|   |           |           |           |
|---|-----------|-----------|-----------|
| C | 1.479698  | 0.063021  | -0.060276 |
| C | 2.298220  | -1.127300 | 0.016364  |
| O | 1.980677  | -2.284823 | -0.142023 |
| O | 3.581558  | -0.757885 | 0.311148  |
| N | 0.173454  | 0.039589  | -0.338488 |
| N | -0.502743 | -1.024992 | -0.531353 |
| H | 1.934208  | 1.020207  | 0.105097  |
| C | 4.486777  | -1.846850 | 0.412264  |
| H | 5.456915  | -1.411196 | 0.649417  |
| H | 4.177027  | -2.539041 | 1.199305  |
| H | 4.537410  | -2.400183 | -0.528898 |
| C | -0.537507 | 1.470349  | -0.458782 |
| C | -1.831449 | 1.338014  | 0.286172  |
| H | -2.117964 | 2.119284  | 0.982147  |
| C | -2.530280 | 0.231597  | 0.057117  |
| C | -3.741036 | -0.347253 | 0.734312  |
| C | -1.914394 | -0.794523 | -0.865645 |
| C | -3.393305 | -1.848383 | 0.749043  |
| H | -4.634491 | -0.180120 | 0.118552  |
| C | -2.731091 | -2.073893 | -0.620216 |
| H | -1.983972 | -0.469399 | -1.917405 |
| H | -2.664002 | -2.042212 | 1.542304  |
| H | -4.261833 | -2.488380 | 0.919193  |
| H | -2.088303 | -2.954747 | -0.657106 |
| H | -3.501337 | -2.171440 | -1.392295 |
| H | -3.925526 | 0.082445  | 1.721661  |

|   |           |          |           |
|---|-----------|----------|-----------|
| H | -0.712467 | 1.505544 | -1.540903 |
| N | 0.239229  | 2.579980 | -0.091636 |
| C | 1.154496  | 3.174778 | -1.042784 |
| H | 1.179752  | 4.259348 | -0.890464 |
| H | 2.183964  | 2.797363 | -0.954921 |
| H | 0.807686  | 2.981634 | -2.060289 |
| C | 0.561697  | 2.825653 | 1.301425  |
| H | -0.093862 | 2.241668 | 1.948880  |
| H | 1.597456  | 2.549137 | 1.544246  |
| H | 0.430924  | 3.888433 | 1.534864  |

**TS-[4+2]-2b**

|   |           |           |           |
|---|-----------|-----------|-----------|
| C | 1.589673  | 0.574156  | -0.034948 |
| C | 2.641820  | -0.422223 | 0.033550  |
| O | 2.494318  | -1.622928 | -0.051287 |
| O | 3.851900  | 0.165576  | 0.211651  |
| N | 0.356314  | 0.160965  | -0.227656 |
| N | -0.291081 | -0.836003 | -0.332609 |
| H | 1.778581  | 1.634725  | 0.030537  |
| C | 4.937041  | -0.749755 | 0.290269  |
| H | 5.831313  | -0.144190 | 0.432138  |
| H | 4.803678  | -1.437315 | 1.128931  |
| H | 5.015085  | -1.337300 | -0.627621 |
| C | -0.872243 | 2.117239  | -0.440716 |
| C | -1.890906 | 1.635511  | 0.351604  |
| H | -2.095571 | 2.129925  | 1.300222  |
| C | -2.456544 | 0.386442  | 0.094648  |
| C | -3.364065 | -0.368476 | 1.040897  |
| C | -2.027945 | -0.463860 | -0.936269 |
| C | -3.103493 | -1.841553 | 0.672677  |
| H | -4.407942 | -0.094594 | 0.837091  |
| C | -2.723610 | -1.797470 | -0.816781 |
| H | -1.726972 | -0.096392 | -1.912618 |
| H | -2.244389 | -2.206898 | 1.241714  |
| H | -3.956094 | -2.490543 | 0.881399  |
| H | -2.067699 | -2.617958 | -1.117515 |
| H | -3.612446 | -1.813104 | -1.459213 |
| H | -3.166668 | -0.142407 | 2.092753  |
| H | -0.751987 | 1.834930  | -1.479808 |
| O | -0.099404 | 3.169288  | -0.130352 |
| H | -0.208399 | 3.390828  | 0.804174  |

**TS-[4+2]-2b-product**

|   |           |           |           |
|---|-----------|-----------|-----------|
| C | 1.553746  | 0.698211  | -0.079323 |
| C | 2.481017  | -0.411306 | 0.015998  |
| O | 2.261781  | -1.597128 | -0.086440 |
| O | 3.727963  | 0.082940  | 0.265683  |
| N | 0.257408  | 0.535434  | -0.352422 |
| N | -0.310087 | -0.593292 | -0.560421 |
| H | 1.914040  | 1.706374  | 0.013182  |
| C | 4.732500  | -0.913854 | 0.387168  |
| H | 5.662539  | -0.381148 | 0.581942  |
| H | 4.504574  | -1.597437 | 1.208839  |
| H | 4.812898  | -1.498312 | -0.532712 |
| C | -0.589555 | 1.846339  | -0.419616 |
| C | -1.851602 | 1.588873  | 0.342444  |
| H | -2.178919 | 2.331380  | 1.064310  |
| C | -2.444917 | 0.424584  | 0.106671  |



|   |           |           |           |
|---|-----------|-----------|-----------|
| C | -3.568820 | -0.294702 | 0.796385  |
| C | -1.745103 | -0.507954 | -0.856626 |
| C | -3.063117 | -1.750258 | 0.763653  |
| H | -4.489053 | -0.208037 | 0.204247  |
| C | -2.414699 | -1.872358 | -0.625296 |
| H | -1.876654 | -0.165781 | -1.896901 |
| H | -2.298508 | -1.884636 | 1.535580  |
| H | -3.855053 | -2.482184 | 0.935769  |
| H | -1.682831 | -2.678120 | -0.698179 |
| H | -3.188421 | -2.033835 | -1.382823 |
| H | -3.773048 | 0.090619  | 1.797933  |
| H | -0.759051 | 1.968711  | -1.494679 |
| O | 0.117022  | 2.949012  | 0.007441  |
| H | 0.185404  | 2.913366  | 0.971171  |

**TS-[4+2]-2c**

|   |           |           |           |
|---|-----------|-----------|-----------|
| C | 1.608522  | 0.852580  | -0.009783 |
| C | 2.636603  | -0.171522 | 0.043185  |
| O | 2.457937  | -1.368097 | -0.033092 |
| O | 3.861873  | 0.390099  | 0.188810  |
| N | 0.359563  | 0.465810  | -0.169144 |
| N | -0.292339 | -0.527622 | -0.239130 |
| H | 1.831011  | 1.903709  | 0.058836  |
| C | 4.929002  | -0.548433 | 0.251121  |
| H | 5.838155  | 0.038864  | 0.372568  |
| H | 4.796613  | -1.228287 | 1.096005  |
| H | 4.976113  | -1.141340 | -0.665327 |
| C | -0.883782 | 2.345078  | -0.427759 |
| C | -1.943504 | 1.891680  | 0.316829  |
| H | -2.188967 | 2.386890  | 1.253147  |
| C | -2.500610 | 0.635019  | 0.059440  |
| C | -3.426578 | -0.129616 | 0.979835  |
| C | -2.001929 | -0.221487 | -0.934959 |
| C | -3.106876 | -1.601408 | 0.653646  |
| H | -4.468317 | 0.107642  | 0.725211  |
| C | -2.661576 | -1.572763 | -0.818152 |
| H | -1.663285 | 0.137305  | -1.902061 |
| H | -2.264528 | -1.931078 | 1.267849  |
| H | -3.948276 | -2.272634 | 0.835520  |
| H | -1.975107 | -2.380941 | -1.080476 |
| H | -3.521190 | -1.616263 | -1.498165 |
| H | -3.283158 | 0.121915  | 2.034282  |
| H | -0.744755 | 2.049024  | -1.461178 |
| H | -0.308989 | 3.207101  | -0.104463 |

**TS-[4+2]-2c-product**

|   |           |           |           |
|---|-----------|-----------|-----------|
| C | -1.557158 | 0.917391  | 0.013126  |
| C | -2.512502 | -0.168669 | -0.019417 |
| O | -2.327518 | -1.348692 | 0.177096  |
| O | -3.743485 | 0.340590  | -0.316026 |
| N | -0.258116 | 0.743505  | 0.289419  |
| N | 0.300754  | -0.389381 | 0.487457  |
| H | -1.892713 | 1.923633  | -0.170211 |
| C | -4.774768 | -0.634601 | -0.372160 |
| H | -5.686766 | -0.093516 | -0.621585 |
| H | -4.556677 | -1.387089 | -1.133983 |
| H | -4.882972 | -1.141748 | 0.589812  |
| C | 0.558792  | 2.015916  | 0.381253  |

|   |           |           |           |
|---|-----------|-----------|-----------|
| C | 1.856012  | 1.815648  | -0.336843 |
| H | 2.192317  | 2.541034  | -1.069366 |
| C | 2.452739  | 0.654949  | -0.087481 |
| C | 3.600435  | -0.051447 | -0.752617 |
| C | 1.725125  | -0.300407 | 0.836979  |
| C | 3.102267  | -1.509410 | -0.758741 |
| H | 4.503031  | 0.029010  | -0.132831 |
| C | 2.411755  | -1.656117 | 0.607371  |
| H | 1.811394  | 0.024000  | 1.887468  |
| H | 2.362659  | -1.635100 | -1.556147 |
| H | 3.902403  | -2.235704 | -0.916832 |
| H | 1.686126  | -2.469862 | 0.647416  |
| H | 3.163244  | -1.821235 | 1.386275  |
| H | 3.832469  | 0.349328  | -1.741964 |
| H | 0.699985  | 2.174920  | 1.456711  |
| H | -0.041127 | 2.828758  | -0.020279 |

**TS-[4+2]-2d**

|   |           |           |           |
|---|-----------|-----------|-----------|
| C | -1.608409 | 0.147448  | -0.068716 |
| C | -2.630649 | -0.893995 | -0.084563 |
| O | -2.431075 | -2.081346 | 0.043040  |
| O | -3.857048 | -0.352869 | -0.252788 |
| N | -0.363128 | -0.220682 | 0.096183  |
| N | 0.312783  | -1.201784 | 0.156200  |
| H | -1.843485 | 1.190451  | -0.204721 |
| C | -4.917012 | -1.303710 | -0.284754 |
| H | -5.829964 | -0.728676 | -0.430539 |
| H | -4.773647 | -2.010960 | -1.104626 |
| H | -4.960455 | -1.862318 | 0.652928  |
| C | 0.999239  | 1.714761  | 0.438911  |
| C | 2.041465  | 1.174624  | -0.275068 |
| H | 2.351937  | 1.694237  | -1.179166 |
| C | 2.507449  | -0.114679 | -0.012590 |
| C | 3.443679  | -0.917722 | -0.887726 |
| C | 1.917652  | -0.954302 | 0.958488  |
| C | 3.065420  | -2.376551 | -0.565928 |
| H | 4.481153  | -0.710804 | -0.592533 |
| C | 2.552452  | -2.321667 | 0.882671  |
| H | 1.565968  | -0.578204 | 1.915073  |
| H | 2.245689  | -2.689621 | -1.217940 |
| H | 3.895008  | -3.073012 | -0.699823 |
| H | 1.840791  | -3.113809 | 1.125274  |
| H | 3.379412  | -2.367746 | 1.601444  |
| H | 3.351110  | -0.669211 | -1.948263 |
| H | 0.766632  | 1.380264  | 1.445135  |
| C | 0.330489  | 2.960007  | -0.030031 |
| O | 0.580567  | 3.444112  | -1.115616 |
| C | -0.662958 | 3.586082  | 0.922712  |
| H | -1.363460 | 2.835966  | 1.303293  |
| H | -0.126170 | 3.989552  | 1.788253  |
| H | -1.200561 | 4.390194  | 0.422011  |

**TS-[4+2]-2d-product**

|   |           |           |           |
|---|-----------|-----------|-----------|
| C | -1.489813 | 0.129817  | -0.019414 |
| C | -2.319789 | -1.058400 | -0.022108 |
| O | -2.027026 | -2.190237 | 0.289400  |
| O | -3.571492 | -0.710632 | -0.435012 |
| N | -0.188583 | 0.108608  | 0.297973  |

|                    |           |           |           |                            |           |          |           |
|--------------------|-----------|-----------|-----------|----------------------------|-----------|----------|-----------|
| N                  | 0.469829  | -0.951786 | 0.566508  | O                          | 0.745349  | 3.597690 | -0.921826 |
| H                  | -1.919798 | 1.059487  | -0.347852 | O                          | -0.707749 | 3.288091 | 0.761776  |
| C                  | -4.491001 | -1.793417 | -0.474782 | H                          | -1.062745 | 4.099028 | 0.366525  |
| H                  | -5.433717 | -1.373663 | -0.823272 |                            |           |          |           |
| H                  | -4.143425 | -2.571835 | -1.158240 |                            |           |          |           |
| H                  | -4.612725 | -2.235732 | 0.517034  |                            |           |          |           |
| C                  | 0.548492  | 1.454956  | 0.370374  |                            |           |          |           |
| C                  | 1.816326  | 1.314126  | -0.410142 |                            |           |          |           |
| H                  | 2.029680  | 2.020629  | -1.203651 |                            |           |          |           |
| C                  | 2.509153  | 0.218216  | -0.118570 |                            |           |          |           |
| C                  | 3.677793  | -0.444465 | -0.792877 |                            |           |          |           |
| C                  | 1.886893  | -0.731070 | 0.886151  |                            |           |          |           |
| C                  | 3.295689  | -1.932987 | -0.683361 |                            |           |          |           |
| H                  | 4.597806  | -0.254158 | -0.224953 |                            |           |          |           |
| C                  | 2.672404  | -2.040617 | 0.718193  |                            |           |          |           |
| H                  | 1.965974  | -0.337933 | 1.913700  |                            |           |          |           |
| H                  | 2.537801  | -2.168267 | -1.437496 |                            |           |          |           |
| H                  | 4.143704  | -2.605424 | -0.829283 |                            |           |          |           |
| H                  | 2.019453  | -2.905622 | 0.843349  |                            |           |          |           |
| H                  | 3.463603  | -2.088770 | 1.473453  |                            |           |          |           |
| H                  | 3.832583  | -0.093882 | -1.815541 |                            |           |          |           |
| H                  | 0.751387  | 1.541836  | 1.447027  |                            |           |          |           |
| C                  | -0.314685 | 2.648579  | -0.059790 |                            |           |          |           |
| O                  | -0.222649 | 3.093478  | -1.177584 |                            |           |          |           |
| C                  | -1.198009 | 3.257489  | 1.001104  |                            |           |          |           |
| H                  | -1.699453 | 2.481805  | 1.585310  |                            |           |          |           |
| H                  | -0.567690 | 3.835254  | 1.686676  |                            |           |          |           |
| H                  | -1.925288 | 3.924285  | 0.539264  |                            |           |          |           |
| <b>TS-[4+2]-2e</b> |           |           |           |                            |           |          |           |
| C                  | -1.614875 | 0.172431  | 0.011354  |                            |           |          |           |
| C                  | -2.654704 | -0.851478 | -0.102384 |                            |           |          |           |
| O                  | -2.463951 | -2.044981 | -0.159121 |                            |           |          |           |
| O                  | -3.877889 | -0.282826 | -0.130966 |                            |           |          |           |
| N                  | -0.378467 | -0.231998 | 0.087187  |                            |           |          |           |
| N                  | 0.317487  | -1.198952 | 0.011032  |                            |           |          |           |
| H                  | -1.836589 | 1.225350  | 0.091475  |                            |           |          |           |
| C                  | -4.953175 | -1.210706 | -0.244348 |                            |           |          |           |
| H                  | -5.862899 | -0.612959 | -0.261405 |                            |           |          |           |
| H                  | -4.859823 | -1.795209 | -1.162248 |                            |           |          |           |
| H                  | -4.959348 | -1.896081 | 0.606088  |                            |           |          |           |
| C                  | 0.992451  | 1.700099  | 0.517225  |                            |           |          |           |
| C                  | 2.064931  | 1.175917  | -0.160679 |                            |           |          |           |
| H                  | 2.436763  | 1.734438  | -1.017142 |                            |           |          |           |
| C                  | 2.500606  | -0.132720 | 0.053134  |                            |           |          |           |
| C                  | 3.483526  | -0.890379 | -0.811511 |                            |           |          |           |
| C                  | 1.848069  | -1.025498 | 0.936156  |                            |           |          |           |
| C                  | 3.083945  | -2.363062 | -0.596973 |                            |           |          |           |
| H                  | 4.503201  | -0.707501 | -0.446646 |                            |           |          |           |
| C                  | 2.486973  | -2.388388 | 0.819789  |                            |           |          |           |
| H                  | 1.443015  | -0.703284 | 1.891663  |                            |           |          |           |
| H                  | 2.303922  | -2.634508 | -1.313065 |                            |           |          |           |
| H                  | 3.918800  | -3.055062 | -0.720929 |                            |           |          |           |
| H                  | 1.763924  | -3.191710 | 0.976730  |                            |           |          |           |
| H                  | 3.270974  | -2.475110 | 1.581655  |                            |           |          |           |
| H                  | 3.452791  | -0.581820 | -1.859879 |                            |           |          |           |
| H                  | 0.671513  | 1.348577  | 1.489886  |                            |           |          |           |
| C                  | 0.375134  | 2.946902  | 0.026712  |                            |           |          |           |
|                    |           |           |           | <b>TS-[4+2]-2e-product</b> |           |          |           |
| C                  | -1.507802 | 0.162439  | 0.043260  |                            |           |          |           |
| C                  | -2.344295 | -1.019157 | -0.032308 |                            |           |          |           |
| O                  | -2.039475 | -2.178474 | 0.130146  |                            |           |          |           |
| O                  | -3.615598 | -0.628913 | -0.332094 |                            |           |          |           |
| N                  | -0.203338 | 0.110861  | 0.332764  |                            |           |          |           |
| N                  | 0.446186  | -0.970726 | 0.536936  |                            |           |          |           |
| H                  | -1.961884 | 1.123903  | -0.111047 |                            |           |          |           |
| C                  | -4.540547 | -1.702171 | -0.441583 |                            |           |          |           |
| H                  | -5.500309 | -1.247537 | -0.683591 |                            |           |          |           |
| H                  | -4.237069 | -2.396393 | -1.228945 |                            |           |          |           |
| H                  | -4.605713 | -2.255320 | 0.498538  |                            |           |          |           |
| C                  | 0.554140  | 1.444545  | 0.444125  |                            |           |          |           |
| C                  | 1.834868  | 1.314178  | -0.319587 |                            |           |          |           |
| H                  | 2.071568  | 2.050625  | -1.078357 |                            |           |          |           |
| C                  | 2.509831  | 0.197953  | -0.070464 |                            |           |          |           |
| C                  | 3.678932  | -0.443913 | -0.762863 |                            |           |          |           |
| C                  | 1.863070  | -0.789747 | 0.876741  |                            |           |          |           |
| C                  | 3.274111  | -1.930354 | -0.736732 |                            |           |          |           |
| H                  | 4.592479  | -0.296923 | -0.172190 |                            |           |          |           |
| C                  | 2.630209  | -2.101399 | 0.649087  |                            |           |          |           |
| H                  | 1.938280  | -0.450806 | 1.923423  |                            |           |          |           |
| H                  | 2.523675  | -2.114402 | -1.512217 |                            |           |          |           |
| H                  | 4.114691  | -2.606416 | -0.906676 |                            |           |          |           |
| H                  | 1.961482  | -2.960460 | 0.719831  |                            |           |          |           |
| H                  | 3.410130  | -2.202640 | 1.410762  |                            |           |          |           |
| H                  | 3.853665  | -0.042090 | -1.763231 |                            |           |          |           |
| H                  | 0.718779  | 1.540228  | 1.523661  |                            |           |          |           |
| C                  | -0.264665 | 2.635023  | -0.027723 |                            |           |          |           |
| O                  | -0.200565 | 3.112342  | -1.128430 |                            |           |          |           |
| O                  | -1.041676 | 3.119689  | 0.952044  |                            |           |          |           |
| H                  | -1.528308 | 3.875746  | 0.587086  |                            |           |          |           |
|                    |           |           |           | <b>TS-[4+2]-2f</b>         |           |          |           |
| C                  | 1.604105  | 0.418277  | 0.001618  |                            |           |          |           |
| C                  | 2.629718  | -0.625728 | 0.057541  |                            |           |          |           |
| O                  | 2.416921  | -1.816825 | 0.041103  |                            |           |          |           |
| O                  | 3.858936  | -0.079103 | 0.123369  |                            |           |          |           |
| N                  | 0.364200  | 0.029487  | -0.091994 |                            |           |          |           |
| N                  | -0.349536 | -0.925173 | -0.057567 |                            |           |          |           |
| H                  | 1.836798  | 1.472706  | 0.022321  |                            |           |          |           |
| C                  | 4.921670  | -1.026846 | 0.185387  |                            |           |          |           |
| H                  | 5.838574  | -0.442871 | 0.240737  |                            |           |          |           |
| H                  | 4.816342  | -1.662562 | 1.067145  |                            |           |          |           |
| H                  | 4.921780  | -1.660499 | -0.704202 |                            |           |          |           |
| C                  | -0.952611 | 1.981155  | -0.509107 |                            |           |          |           |
| C                  | -2.019700 | 1.504209  | 0.219067  |                            |           |          |           |
| H                  | -2.344996 | 2.055050  | 1.097742  |                            |           |          |           |
| C                  | -2.510490 | 0.215491  | 0.002217  |                            |           |          |           |
| C                  | -3.486858 | -0.519742 | 0.893388  |                            |           |          |           |
| C                  | -1.924918 | -0.683605 | -0.917980 |                            |           |          |           |
| C                  | -3.142045 | -2.001331 | 0.647166  |                            |           |          |           |
| H                  | -4.512242 | -0.299934 | 0.567529  |                            |           |          |           |
| C                  | -2.599761 | -2.027672 | -0.791297 |                            |           |          |           |

|   |           |           |           |
|---|-----------|-----------|-----------|
| H | -1.543187 | -0.366365 | -1.884649 |
| H | -2.344870 | -2.305626 | 1.330367  |
| H | -3.993476 | -2.667789 | 0.794896  |
| H | -1.906993 | -2.849584 | -0.983977 |
| H | -3.413473 | -2.082720 | -1.524367 |
| H | -3.408564 | -0.226778 | 1.943837  |
| H | -0.719898 | 1.603077  | -1.497646 |
| C | -0.236316 | 3.154725  | -0.124935 |
| N | 0.395420  | 4.076789  | 0.183290  |

**TS-[4+2]-2f-product**

|   |           |           |           |
|---|-----------|-----------|-----------|
| C | -1.542449 | 0.484295  | 0.054126  |
| C | -2.440595 | -0.656106 | -0.010979 |
| O | -2.187918 | -1.826799 | 0.156477  |
| O | -3.690092 | -0.204171 | -0.297915 |
| N | -0.241606 | 0.355930  | 0.321633  |
| N | 0.365982  | -0.758836 | 0.486002  |
| H | -1.933530 | 1.473073  | -0.109794 |
| C | -4.673815 | -1.227177 | -0.385541 |
| H | -5.609579 | -0.722765 | -0.621518 |
| H | -4.416727 | -1.944140 | -1.168879 |
| H | -4.757074 | -1.765539 | 0.561590  |
| C | 0.580088  | 1.649630  | 0.480229  |
| C | 1.864455  | 1.495960  | -0.286849 |
| H | 2.152850  | 2.251076  | -1.008260 |
| C | 2.481314  | 0.339201  | -0.072397 |
| C | 3.624084  | -0.330875 | -0.780855 |
| C | 1.785815  | -0.646661 | 0.841724  |
| C | 3.154953  | -1.798658 | -0.799917 |
| H | 4.538740  | -0.240234 | -0.180962 |
| C | 2.499048  | -1.981919 | 0.578403  |
| H | 1.872014  | -0.342828 | 1.898697  |
| H | 2.401046  | -1.927907 | -1.582953 |
| H | 3.967104  | -2.503977 | -0.986908 |
| H | 1.793820  | -2.812972 | 0.622739  |
| H | 3.270447  | -2.137450 | 1.339380  |
| H | 3.821835  | 0.093306  | -1.767509 |
| H | 0.762446  | 1.690323  | 1.561574  |
| C | -0.156105 | 2.853744  | 0.098691  |
| N | -0.681528 | 3.838503  | -0.196992 |

**TS-[4+2]-3a**

|   |           |           |           |
|---|-----------|-----------|-----------|
| C | -2.554509 | -1.383991 | -0.074779 |
| O | -2.167326 | -2.524091 | 0.075725  |
| C | -1.747976 | -0.186009 | -0.010856 |
| H | -2.168851 | 0.798165  | -0.161001 |
| N | -0.457724 | -0.280286 | 0.239271  |
| N | 0.385682  | -1.117076 | 0.408036  |
| O | -3.857610 | -1.078049 | -0.332213 |
| C | -4.711534 | -2.209892 | -0.415274 |
| H | -5.707940 | -1.821921 | -0.625524 |
| H | -4.388688 | -2.883204 | -1.213228 |
| H | -4.710547 | -2.768114 | 0.524293  |
| C | 2.211417  | 0.537929  | -0.107225 |
| C | 3.203074  | 0.152346  | -1.184760 |
| C | 3.526354  | -1.340631 | -1.158166 |
| C | 3.989531  | -1.727367 | 0.243614  |
| C | 2.850385  | -1.543538 | 1.251589  |

|   |           |           |           |
|---|-----------|-----------|-----------|
| C | 1.958300  | -0.349964 | 0.966141  |
| C | 1.380896  | 1.633185  | -0.334353 |
| H | 2.628947  | -1.914044 | -1.419636 |
| H | 4.342032  | -2.762444 | 0.270731  |
| H | 2.199916  | -2.426008 | 1.242602  |
| H | 1.477481  | 2.161663  | -1.278638 |
| H | 2.813726  | 0.451996  | -2.163551 |
| H | 4.131614  | 0.720762  | -1.031124 |
| H | 3.254744  | -1.460697 | 2.265250  |
| H | 4.842536  | -1.093628 | 0.518586  |
| H | 4.295150  | -1.567889 | -1.902635 |
| C | 0.296498  | 1.933426  | 0.492278  |
| H | 0.296651  | 1.611841  | 1.528503  |
| H | 1.538634  | 0.089435  | 1.867876  |
| N | -0.709242 | 2.770742  | 0.180988  |
| C | -1.649703 | 3.226417  | 1.187747  |
| H | -2.675918 | 3.103125  | 0.829343  |
| H | -1.531162 | 2.626103  | 2.090928  |
| H | -1.489409 | 4.281319  | 1.439567  |
| C | -0.871094 | 3.250019  | -1.178056 |
| H | -0.739934 | 2.416414  | -1.875286 |
| H | -1.879430 | 3.649735  | -1.295723 |
| H | -0.150909 | 4.039272  | -1.424911 |

**TS-[4+2]-3a-product**

|   |           |           |           |
|---|-----------|-----------|-----------|
| C | 2.886368  | -0.827022 | -0.082366 |
| O | 2.644882  | -1.940245 | 0.326144  |
| C | 1.973769  | 0.243689  | -0.425322 |
| H | 2.377622  | 1.167094  | -0.803144 |
| N | 0.637938  | 0.135735  | -0.382565 |
| N | 0.043278  | -0.886997 | 0.109039  |
| O | 4.162904  | -0.394070 | -0.308489 |
| C | 5.160798  | -1.363976 | -0.025655 |
| H | 6.115641  | -0.883313 | -0.235788 |
| H | 5.112854  | -1.677579 | 1.020141  |
| H | 5.033115  | -2.248646 | -0.654520 |
| C | -2.096670 | 0.002106  | -0.914627 |
| C | -3.538459 | -0.297409 | -1.220140 |
| C | -4.281672 | -0.666207 | 0.074261  |
| C | -3.572008 | -1.809066 | 0.805207  |
| C | -2.114592 | -1.456210 | 1.108237  |
| C | -1.364036 | -1.081028 | -0.182432 |
| C | -1.487746 | 1.146075  | -1.206380 |
| H | -4.315256 | 0.215881  | 0.726743  |
| H | -4.099171 | -2.050567 | 1.733127  |
| H | -2.069485 | -0.607570 | 1.801316  |
| H | -2.000471 | 1.961566  | -1.709573 |
| H | -4.006859 | 0.558094  | -1.716062 |
| H | -3.591648 | -1.149438 | -1.911792 |
| H | -1.588011 | -2.288626 | 1.582488  |
| H | -3.603273 | -2.711336 | 0.179647  |
| H | -5.316824 | -0.937678 | -0.154404 |
| C | -0.087335 | 1.438915  | -0.779041 |
| H | 0.499490  | 1.834586  | -1.612732 |
| H | -1.403639 | -1.981085 | -0.823357 |
| N | -0.062390 | 2.404734  | 0.282126  |
| C | 1.193546  | 3.102310  | 0.506098  |
| H | 1.936832  | 2.496930  | 1.046480  |

|   |           |          |           |
|---|-----------|----------|-----------|
| H | 1.623018  | 3.408175 | -0.452392 |
| H | 0.990758  | 4.005086 | 1.088913  |
| C | -0.669570 | 1.966927 | 1.529144  |
| H | -1.682582 | 1.605692 | 1.342412  |
| H | -0.091469 | 1.166962 | 2.021520  |
| H | -0.729062 | 2.821368 | 2.207622  |

**TS-[4+2]-3b**

|   |           |           |           |
|---|-----------|-----------|-----------|
| C | 2.840035  | -0.550054 | 0.059366  |
| O | 2.570377  | -1.729995 | -0.016798 |
| C | 1.900261  | 0.550388  | -0.031067 |
| H | 2.202410  | 1.584795  | 0.024761  |
| N | 0.629296  | 0.275057  | -0.234970 |
| N | -0.103617 | -0.667587 | -0.332993 |
| O | 4.103240  | -0.089615 | 0.248015  |
| C | 5.085886  | -1.112110 | 0.346992  |
| H | 6.036390  | -0.601958 | 0.498362  |
| H | 4.870475  | -1.776523 | 1.187286  |
| H | 5.115114  | -1.710977 | -0.566471 |
| C | -2.157259 | 0.707016  | 0.092582  |
| C | -3.098473 | 0.230012  | 1.177333  |
| C | -3.223042 | -1.292937 | 1.194204  |
| C | -3.603031 | -1.782663 | -0.200637 |
| C | -2.479131 | -1.483331 | -1.197573 |
| C | -1.780525 | -0.160469 | -0.953999 |
| C | -1.460058 | 1.901497  | 0.282243  |
| H | -2.264403 | -1.735108 | 1.490401  |
| H | -3.813928 | -2.855674 | -0.196821 |
| H | -1.708912 | -2.260498 | -1.138341 |
| H | -1.606125 | 2.447108  | 1.214361  |
| H | -2.759791 | 0.606438  | 2.148310  |
| H | -4.090817 | 0.668751  | 1.001018  |
| H | -2.865942 | -1.501138 | -2.221033 |
| H | -4.526434 | -1.277960 | -0.512070 |
| H | -3.970648 | -1.595292 | 1.933141  |
| C | -0.384763 | 2.258610  | -0.509233 |
| H | -0.293241 | 1.979011  | -1.551937 |
| H | -1.402476 | 0.302552  | -1.861769 |
| O | 0.473099  | 3.245137  | -0.202160 |
| H | 0.385442  | 3.474218  | 0.732824  |

**TS-[4+2]-3b-product**

|   |           |           |           |
|---|-----------|-----------|-----------|
| C | 2.825833  | -0.441130 | -0.032752 |
| O | 2.562636  | -1.620026 | -0.115308 |
| C | 1.941498  | 0.703605  | -0.105886 |
| H | 2.331684  | 1.693274  | 0.052136  |
| N | 0.624116  | 0.602690  | -0.320466 |
| N | 0.044501  | -0.503530 | -0.601860 |
| O | 4.097815  | 0.008069  | 0.177230  |
| C | 5.066562  | -1.024606 | 0.283674  |
| H | 6.022158  | -0.525300 | 0.439619  |
| H | 4.840199  | -1.685849 | 1.123971  |
| H | 5.094696  | -1.626817 | -0.627852 |
| C | -2.188628 | 0.638334  | -0.280833 |
| C | -3.678786 | 0.470266  | -0.145719 |
| C | -4.040011 | -0.739886 | 0.724560  |
| C | -3.328063 | -1.992895 | 0.213639  |
| C | -1.815171 | -1.784857 | 0.204170  |

|   |           |           |           |
|---|-----------|-----------|-----------|
| C | -1.402387 | -0.578801 | -0.666257 |
| C | -1.557620 | 1.792714  | -0.094880 |
| H | -3.733098 | -0.545953 | 1.759712  |
| H | -3.580664 | -2.856409 | 0.836154  |
| H | -1.459138 | -1.592812 | 1.223701  |
| H | -2.083683 | 2.704577  | 0.178040  |
| H | -4.123606 | 1.391963  | 0.241831  |
| H | -4.094799 | 0.309336  | -1.150596 |
| H | -1.280976 | -2.665255 | -0.160167 |
| H | -3.677164 | -2.221366 | -0.802619 |
| H | -5.125119 | -0.879834 | 0.729752  |
| C | -0.092997 | 1.962001  | -0.312871 |
| H | 0.134011  | 2.386946  | -1.295530 |
| H | -1.668938 | -0.829289 | -1.707916 |
| O | 0.478800  | 2.823918  | 0.612776  |
| H | 0.228734  | 2.524509  | 1.497397  |

**TS-[4+2]-3c**

|   |           |           |           |
|---|-----------|-----------|-----------|
| C | -2.725568 | -0.057279 | -0.081197 |
| O | -3.223218 | 1.029451  | -0.279360 |
| C | -1.314349 | -0.325316 | 0.139989  |
| H | -0.944857 | -1.323235 | 0.309095  |
| N | -0.478643 | 0.686465  | 0.135711  |
| N | -0.473170 | 1.857639  | -0.102664 |
| O | -3.442579 | -1.206937 | -0.032028 |
| C | -4.838955 | -1.031443 | -0.239977 |
| H | -5.278903 | -2.025801 | -0.177455 |
| H | -5.263756 | -0.376143 | 0.524040  |
| H | -5.030723 | -0.588887 | -1.220242 |
| C | 2.282832  | 0.650829  | -0.026674 |
| C | 3.114117  | -0.112105 | -1.039518 |
| C | 2.708986  | -1.584577 | -1.104604 |
| C | 2.746288  | -2.190792 | 0.296739  |
| C | 1.727244  | -1.503814 | 1.211485  |
| C | 1.616117  | -0.024374 | 0.977226  |
| C | 2.005601  | 2.009942  | -0.239940 |
| H | 1.693505  | -1.664662 | -1.512921 |
| H | 2.552385  | -3.266596 | 0.266780  |
| H | 0.735405  | -1.958099 | 1.080407  |
| H | 1.168196  | 0.540079  | 1.788442  |
| H | 2.372336  | 2.463588  | -1.157525 |
| H | 3.014304  | 0.361117  | -2.021309 |
| H | 4.174690  | -0.040973 | -0.763920 |
| H | 1.975781  | -1.675367 | 2.265242  |
| H | 3.753552  | -2.059588 | 0.710498  |
| H | 3.376057  | -2.128987 | -1.779074 |
| C | 1.012552  | 2.690729  | 0.476332  |
| H | 0.888096  | 2.511414  | 1.540245  |
| H | 0.793802  | 3.712496  | 0.188319  |

**TS-[4+2]-3c-product**

|   |           |           |           |
|---|-----------|-----------|-----------|
| C | -2.749030 | -0.037284 | 0.035205  |
| O | -3.193969 | 1.028526  | -0.328242 |
| C | -1.375930 | -0.431719 | 0.247741  |
| H | -1.161408 | -1.438268 | 0.565940  |
| N | -0.321369 | 0.384884  | 0.075044  |
| N | -0.444946 | 1.605549  | -0.275135 |
| O | -3.554701 | -1.106500 | 0.314379  |

|   |           |           |           |
|---|-----------|-----------|-----------|
| C | -4.939468 | -0.847112 | 0.138848  |
| H | -5.453780 | -1.772540 | 0.396104  |
| H | -5.269124 | -0.033939 | 0.790356  |
| H | -5.155200 | -0.565870 | -0.895037 |
| C | 2.144548  | 0.631482  | 0.486614  |
| C | 3.424899  | -0.052394 | 0.875541  |
| C | 3.782960  | -1.090065 | -0.202867 |
| C | 2.617207  | -2.051696 | -0.452016 |
| C | 1.317246  | -1.312668 | -0.792374 |
| C | 0.993242  | -0.312980 | 0.328977  |
| C | 2.026432  | 1.900927  | 0.121262  |
| H | 4.019336  | -0.558342 | -1.132331 |
| H | 2.864091  | -2.746627 | -1.259869 |
| H | 1.428858  | -0.750899 | -1.727701 |
| H | 0.840738  | -0.865619 | 1.263442  |
| H | 2.875648  | 2.578018  | 0.175178  |
| H | 4.225088  | 0.683904  | 0.991751  |
| H | 3.301028  | -0.563227 | 1.840421  |
| H | 0.494208  | -2.019334 | -0.923907 |
| H | 2.452693  | -2.660414 | 0.447272  |
| H | 4.677610  | -1.647989 | 0.089808  |
| C | 0.736566  | 2.433821  | -0.406550 |
| H | 0.489251  | 3.385498  | 0.080760  |
| H | 0.852498  | 2.684534  | -1.472942 |

**TS-[4+2]-3d**

|   |           |           |           |
|---|-----------|-----------|-----------|
| C | -2.633847 | -1.256735 | -0.117973 |
| O | -2.201999 | -2.380487 | 0.010372  |
| C | -1.843677 | -0.030001 | -0.094041 |
| H | -2.289988 | 0.942361  | -0.227762 |
| N | -0.549529 | -0.126620 | 0.078873  |
| N | 0.299074  | -0.972889 | 0.128469  |
| O | -3.943483 | -0.972564 | -0.293574 |
| C | -4.790668 | -2.116559 | -0.332959 |
| H | -5.799607 | -1.736361 | -0.484429 |
| H | -4.503250 | -2.779317 | -1.152209 |
| H | -4.727034 | -2.674383 | 0.604088  |
| C | 2.248047  | 0.455294  | -0.029765 |
| C | 3.277031  | 0.023130  | -1.049397 |
| C | 3.449437  | -1.495103 | -1.083883 |
| C | 3.732407  | -2.001407 | 0.327942  |
| C | 2.526077  | -1.756969 | 1.241475  |
| C | 1.790332  | -0.459360 | 0.956775  |
| C | 1.536815  | 1.642035  | -0.230100 |
| H | 2.533685  | -1.960669 | -1.466856 |
| H | 3.976324  | -3.067232 | 0.324058  |
| H | 1.797222  | -2.566159 | 1.128590  |
| H | 1.733653  | 2.234333  | -1.121999 |
| H | 2.999194  | 0.411238  | -2.034464 |
| H | 4.240665  | 0.486426  | -0.792741 |
| H | 2.837660  | -1.758281 | 2.290301  |
| H | 4.611818  | -1.475630 | 0.720498  |
| H | 4.263829  | -1.759934 | -1.763989 |
| C | 0.402024  | 1.959726  | 0.481458  |
| H | 0.230151  | 1.597967  | 1.490115  |
| H | 1.334426  | -0.024225 | 1.842781  |
| C | -0.483028 | 3.066196  | 0.016521  |
| O | -0.320861 | 3.599309  | -1.062327 |

|   |           |          |          |
|---|-----------|----------|----------|
| C | -1.582363 | 3.485102 | 0.966351 |
| H | -2.133422 | 2.612605 | 1.331523 |
| H | -1.136258 | 3.970311 | 1.841428 |
| H | -2.256659 | 4.181354 | 0.469478 |

**TS-[4+2]-3d-product**

|   |           |           |           |
|---|-----------|-----------|-----------|
| C | -2.500295 | -1.251183 | -0.062579 |
| O | -2.061643 | -2.360361 | 0.139458  |
| C | -1.825523 | 0.027980  | 0.029941  |
| H | -2.373944 | 0.916230  | -0.227729 |
| N | -0.523387 | 0.148282  | 0.324145  |
| N | 0.245649  | -0.837824 | 0.573069  |
| O | -3.795243 | -1.029402 | -0.428156 |
| C | -4.571917 | -2.212233 | -0.557665 |
| H | -5.569655 | -1.885675 | -0.848001 |
| H | -4.149379 | -2.871942 | -1.319374 |
| H | -4.608159 | -2.758095 | 0.388304  |
| C | 2.187093  | 0.556336  | -0.134750 |
| C | 3.599956  | 0.519894  | -0.663542 |
| C | 4.135856  | -0.893133 | -0.897174 |
| C | 3.880140  | -1.756159 | 0.337891  |
| C | 2.378039  | -1.896798 | 0.564574  |
| C | 1.671119  | -0.548192 | 0.767925  |
| C | 1.346477  | 1.565915  | -0.348320 |
| H | 3.635466  | -1.346091 | -1.761469 |
| H | 4.325997  | -2.747434 | 0.214405  |
| H | 1.923403  | -2.366032 | -0.314608 |
| H | 1.543846  | 2.403288  | -1.008594 |
| H | 3.666746  | 1.135692  | -1.565923 |
| H | 4.240822  | 1.000891  | 0.089491  |
| H | 2.149576  | -2.542756 | 1.416076  |
| H | 4.361488  | -1.297641 | 1.212992  |
| H | 5.203605  | -0.844014 | -1.130664 |
| C | 0.057993  | 1.546846  | 0.410012  |
| H | 0.245423  | 1.655658  | 1.489156  |
| H | 1.831194  | -0.219887 | 1.813191  |
| C | -0.917319 | 2.652408  | -0.022170 |
| O | -0.859498 | 3.111936  | -1.135848 |
| C | -1.861905 | 3.170166  | 1.035386  |
| H | -2.265738 | 2.354565  | 1.640038  |
| H | -1.299117 | 3.832115  | 1.703523  |
| H | -2.664616 | 3.739461  | 0.567872  |

**TS-[4+2]-3e**

|   |           |           |           |
|---|-----------|-----------|-----------|
| C | 2.672884  | -1.189709 | 0.138236  |
| O | 2.254992  | -2.324626 | 0.174703  |
| C | 1.854116  | 0.018436  | 0.026478  |
| H | 2.283391  | 1.006427  | -0.038803 |
| N | 0.562416  | -0.124088 | -0.070367 |
| N | -0.292422 | -0.964630 | 0.000221  |
| O | 3.983125  | -0.869603 | 0.189296  |
| C | 4.856130  | -1.989930 | 0.299824  |
| H | 5.864250  | -1.580658 | 0.337598  |
| H | 4.637633  | -2.558313 | 1.206521  |
| H | 4.742037  | -2.651461 | -0.561830 |
| C | -2.249617 | 0.412988  | -0.030827 |
| C | -3.304720 | 0.013025  | 0.975322  |
| C | -3.440253 | -1.505007 | 1.092901  |

|   |           |           |           |
|---|-----------|-----------|-----------|
| C | -3.661054 | -2.099250 | -0.295589 |
| C | -2.431414 | -1.874326 | -1.183020 |
| C | -1.730158 | -0.548961 | -0.941545 |
| C | -1.580791 | 1.631312  | 0.122882  |
| H | -2.527619 | -1.922849 | 1.533661  |
| H | -3.877667 | -3.169375 | -0.237589 |
| H | -1.690657 | -2.661592 | -1.009364 |
| H | -1.833977 | 2.265070  | 0.970862  |
| H | -3.073448 | 0.464060  | 1.945579  |
| H | -4.270058 | 0.433755  | 0.658557  |
| H | -2.709930 | -1.932026 | -2.239559 |
| H | -4.539764 | -1.621365 | -0.746535 |
| H | -4.271854 | -1.751642 | 1.758914  |
| C | -0.429631 | 1.948082  | -0.559366 |
| H | -0.173494 | 1.556843  | -1.535787 |
| H | -1.244067 | -0.155799 | -1.831509 |
| C | 0.390024  | 3.078960  | -0.078542 |
| O | 0.134027  | 3.794687  | 0.860552  |
| O | 1.517500  | 3.219910  | -0.811500 |
| H | 2.005009  | 3.963277  | -0.424626 |

**TS-[4+2]-3e-product**

|   |           |           |           |
|---|-----------|-----------|-----------|
| C | -2.949021 | -0.704576 | 0.117859  |
| O | -2.767368 | -1.876555 | -0.123187 |
| C | -1.978602 | 0.323706  | 0.422684  |
| H | -2.312337 | 1.328491  | 0.624010  |
| N | -0.651428 | 0.106997  | 0.461906  |
| N | -0.109094 | -1.017356 | 0.216538  |
| O | -4.193990 | -0.145741 | 0.141531  |
| C | -5.243531 | -1.059618 | -0.143823 |
| H | -6.166287 | -0.483106 | -0.090556 |
| H | -5.120940 | -1.493118 | -1.139426 |
| H | -5.259133 | -1.873403 | 0.585336  |
| C | 2.104681  | -0.047605 | 0.947414  |
| C | 3.565402  | -0.335259 | 1.138957  |
| C | 4.184664  | -0.631574 | -0.240479 |
| C | 3.425005  | -1.750268 | -0.960822 |
| C | 1.931735  | -1.434630 | -1.088969 |
| C | 1.330352  | -1.154979 | 0.304041  |
| C | 1.520912  | 1.118861  | 1.192203  |
| H | 4.139434  | 0.282623  | -0.844626 |
| H | 3.855991  | -1.916148 | -1.952758 |
| H | 1.771665  | -0.542836 | -1.705019 |
| H | 2.051308  | 1.956247  | 1.637100  |
| H | 4.065495  | 0.509652  | 1.621736  |
| H | 3.690592  | -1.213352 | 1.785958  |
| H | 1.385523  | -2.264254 | -1.545638 |
| H | 3.548772  | -2.687883 | -0.402087 |
| H | 5.240426  | -0.895581 | -0.125242 |
| C | 0.115787  | 1.372329  | 0.757386  |
| H | -0.456698 | 1.914284  | 1.510521  |
| H | 1.488911  | -2.065843 | 0.903284  |
| C | 0.107845  | 2.163293  | -0.552607 |
| O | 0.587871  | 1.771491  | -1.581387 |
| O | -0.481836 | 3.357566  | -0.401068 |
| H | -0.447847 | 3.804569  | -1.261877 |

**TS-[4+2]-3f**

|   |           |           |           |
|---|-----------|-----------|-----------|
| C | 2.766490  | -0.812908 | 0.090924  |
| O | 2.398315  | -1.965400 | 0.070827  |
| C | 1.890915  | 0.359161  | 0.023110  |
| H | 2.267486  | 1.371521  | 0.043372  |
| N | 0.609364  | 0.151536  | -0.086171 |
| N | -0.210226 | -0.723208 | -0.046488 |
| O | 4.057303  | -0.434952 | 0.171168  |
| C | 4.983301  | -1.515872 | 0.242462  |
| H | 5.969432  | -1.059633 | 0.307519  |
| H | 4.785391  | -2.132060 | 1.122203  |
| H | 4.907761  | -2.143964 | -0.647886 |
| C | -2.217257 | 0.607538  | 0.006585  |
| C | -3.236229 | 0.174389  | 1.036516  |
| C | -3.327044 | -1.347524 | 1.145927  |
| C | -3.572578 | -1.937341 | -0.240156 |
| C | -2.377088 | -1.671451 | -1.162119 |
| C | -1.706028 | -0.329142 | -0.932226 |
| C | -1.570352 | 1.837975  | 0.160053  |
| H | -2.390969 | -1.743250 | 1.556886  |
| H | -3.756291 | -3.013567 | -0.184223 |
| H | -1.609202 | -2.438152 | -1.016956 |
| H | -1.819825 | 2.447359  | 1.025382  |
| H | -2.992575 | 0.623843  | 2.004589  |
| H | -4.220128 | 0.570589  | 0.747175  |
| H | -2.685099 | -1.730009 | -2.210319 |
| H | -4.477691 | -1.482008 | -0.660920 |
| H | -4.131946 | -1.620763 | 1.833769  |
| C | -0.447275 | 2.172694  | -0.568168 |
| H | -0.254237 | 1.778157  | -1.558514 |
| H | -1.257388 | 0.080005  | -1.834554 |
| C | 0.387491  | 3.269402  | -0.191007 |
| N | 1.111470  | 4.122132  | 0.113389  |

**TS-[4+2]-3f-product**

|   |           |           |           |
|---|-----------|-----------|-----------|
| C | -2.970094 | -0.464146 | 0.096807  |
| O | -2.797348 | -1.650700 | -0.061805 |
| C | -1.982726 | 0.576045  | 0.308529  |
| H | -2.304558 | 1.598636  | 0.418329  |
| N | -0.661737 | 0.346737  | 0.336742  |
| N | -0.131294 | -0.799091 | 0.158267  |
| O | -4.206020 | 0.106049  | 0.110251  |
| C | -5.272300 | -0.813557 | -0.086947 |
| H | -6.186646 | -0.222807 | -0.055307 |
| H | -5.175176 | -1.316982 | -1.051738 |
| H | -5.279312 | -1.572375 | 0.699184  |
| C | 2.089656  | 0.165474  | 0.877597  |
| C | 3.538176  | -0.144423 | 1.120528  |
| C | 4.184484  | -0.525292 | -0.225852 |
| C | 3.410663  | -1.652243 | -0.917631 |
| C | 1.929551  | -1.303700 | -1.093362 |
| C | 1.303506  | -0.956098 | 0.274201  |
| C | 1.534982  | 1.361028  | 1.030799  |
| H | 4.189429  | 0.360766  | -0.872036 |
| H | 3.859002  | -1.871112 | -1.891142 |
| H | 1.814679  | -0.434739 | -1.753624 |
| H | 2.073454  | 2.217694  | 1.424332  |
| H | 4.046725  | 0.712468  | 1.571660  |
| H | 3.624272  | -0.990071 | 1.814858  |

|   |           |           |           |
|---|-----------|-----------|-----------|
| H | 1.370803  | -2.133006 | -1.534459 |
| H | 3.492941  | -2.568915 | -0.318597 |
| H | 5.226852  | -0.817025 | -0.066809 |
| C | 0.135248  | 1.617341  | 0.558193  |
| H | -0.430725 | 2.198365  | 1.290529  |
| H | 1.438063  | -1.843186 | 0.912653  |
| C | 0.153123  | 2.367663  | -0.710710 |
| N | 0.213250  | 2.976775  | -1.690481 |

**TS-[4+2]-4a**

|   |           |           |           |
|---|-----------|-----------|-----------|
| C | -2.849998 | -0.609386 | -0.138930 |
| O | -3.085590 | -1.791124 | 0.003698  |
| C | -1.580782 | 0.045685  | 0.080653  |
| H | -1.448186 | 1.108018  | -0.059870 |
| N | -0.552424 | -0.669563 | 0.494307  |
| N | -0.241597 | -1.792169 | 0.747119  |
| O | -3.794563 | 0.286239  | -0.542769 |
| C | -5.070760 | -0.289209 | -0.783329 |
| H | -5.717139 | 0.529938  | -1.097502 |
| H | -5.013090 | -1.050499 | -1.565245 |
| H | -5.463108 | -0.758241 | 0.122402  |
| C | 2.817124  | 0.392080  | -1.209387 |
| C | 3.070186  | -1.912045 | -0.512174 |
| C | 3.814998  | -0.779330 | -1.232576 |
| H | 4.705562  | -0.508852 | -0.656403 |
| H | 4.132103  | -1.043565 | -2.243351 |
| H | 3.310160  | 1.367019  | -1.255196 |
| H | 3.733488  | -2.656524 | -0.064411 |
| C | 2.067666  | 0.158701  | 0.094529  |
| C | 2.236817  | -1.171690 | 0.509639  |
| C | 1.197547  | 1.004085  | 0.775646  |
| H | 0.974624  | 0.763406  | 1.811756  |
| C | 1.482615  | -1.795020 | 1.503920  |
| H | 1.186669  | -1.241432 | 2.389606  |
| N | 0.702022  | 2.194941  | 0.384360  |
| C | 0.665011  | 2.594161  | -1.012692 |
| H | 1.586142  | 3.091788  | -1.333398 |
| H | 0.484757  | 1.715932  | -1.635093 |
| H | -0.168314 | 3.286462  | -1.154317 |
| C | 0.065610  | 3.084312  | 1.339003  |
| H | 0.029273  | 2.604998  | 2.317852  |
| H | 0.622316  | 4.023741  | 1.432139  |
| H | -0.958655 | 3.313754  | 1.026962  |
| H | 1.649283  | -2.851626 | 1.686182  |
| H | 2.397468  | -2.440663 | -1.202204 |
| H | 2.145656  | 0.318903  | -2.073653 |

**TS-[4+2]-4a-product**

|   |           |           |           |
|---|-----------|-----------|-----------|
| C | -2.892523 | -0.522823 | 0.116774  |
| O | -3.060094 | -1.462006 | -0.628018 |
| C | -1.668066 | 0.167345  | 0.460259  |
| H | -1.710152 | 0.981190  | 1.163886  |
| N | -0.455139 | -0.176019 | -0.000998 |
| N | -0.281752 | -1.096608 | -0.873050 |
| O | -3.923593 | 0.058961  | 0.800603  |
| C | -5.188091 | -0.539567 | 0.557941  |
| H | -5.906502 | 0.022905  | 1.153360  |
| H | -5.446639 | -0.486556 | -0.502610 |

|   |           |           |           |
|---|-----------|-----------|-----------|
| H | -5.185250 | -1.590691 | 0.857204  |
| C | 3.186203  | 0.414374  | 1.280910  |
| C | 3.558281  | -1.564748 | -0.148513 |
| C | 4.094856  | -0.825397 | 1.101229  |
| H | 3.984235  | -1.476184 | 1.972802  |
| H | 5.151453  | -0.565192 | 1.015568  |
| H | 2.996370  | 0.647973  | 2.333835  |
| H | 3.613294  | -2.653726 | -0.051888 |
| C | 1.946799  | 0.004702  | 0.530142  |
| C | 2.143410  | -1.052753 | -0.250166 |
| C | 0.670010  | 0.764386  | 0.503599  |
| H | 0.358035  | 1.050190  | 1.512034  |
| C | 1.072573  | -1.551995 | -1.151948 |
| H | 1.030674  | -2.649190 | -1.131152 |
| N | 0.766058  | 1.955146  | -0.290652 |
| C | 1.041694  | 1.732902  | -1.703389 |
| H | 1.232655  | 2.698512  | -2.177359 |
| H | 1.934349  | 1.114461  | -1.818015 |
| H | 0.200401  | 1.247070  | -2.224770 |
| C | -0.292305 | 2.934852  | -0.095620 |
| H | -0.462000 | 3.086166  | 0.974276  |
| H | 0.030716  | 3.886805  | -0.525477 |
| H | -1.244494 | 2.642481  | -0.562988 |
| H | 1.315446  | -1.295319 | -2.196502 |
| H | 4.119152  | -1.297956 | -1.054225 |
| H | 3.616543  | 1.316108  | 0.826926  |

**TS-[4+2]-4b**

|   |           |           |           |
|---|-----------|-----------|-----------|
| C | 2.762481  | -0.211558 | 0.126186  |
| O | 2.938009  | -1.408933 | 0.204352  |
| C | 1.516588  | 0.449728  | -0.210135 |
| H | 1.421522  | 1.522108  | -0.282698 |
| N | 0.468865  | -0.299437 | -0.481488 |
| N | 0.125691  | -1.442345 | -0.510879 |
| O | 3.744013  | 0.697923  | 0.355369  |
| C | 5.000067  | 0.124227  | 0.693574  |
| H | 5.680691  | 0.960582  | 0.848208  |
| H | 4.919469  | -0.476336 | 1.602839  |
| H | 5.361768  | -0.518665 | -0.112473 |
| C | -2.714932 | 1.098719  | 0.989809  |
| C | -3.085797 | -1.296622 | 0.789414  |
| C | -3.714677 | -0.014228 | 1.360298  |
| H | -4.666343 | 0.178856  | 0.856273  |
| H | -3.906215 | -0.070098 | 2.433069  |
| H | -3.194461 | 2.077537  | 0.882373  |
| H | -3.820618 | -2.069481 | 0.549718  |
| C | -2.107606 | 0.576283  | -0.297197 |
| C | -2.322085 | -0.803844 | -0.419005 |
| C | -1.166687 | 1.234658  | -1.055665 |
| H | -0.876985 | 0.908779  | -2.047889 |
| C | -1.571307 | -1.608226 | -1.273977 |
| H | -1.295703 | -1.239961 | -2.257467 |
| H | -1.706785 | -2.683550 | -1.229221 |
| H | -2.367250 | -1.732374 | 1.497754  |
| H | -1.938384 | 1.186555  | 1.763626  |
| O | -0.727162 | 2.476282  | -0.794529 |
| H | -0.987744 | 2.731516  | 0.101114  |

**TS-[4+2]-4b-product**

|   |           |           |           |
|---|-----------|-----------|-----------|
| C | 2.856492  | -0.186705 | 0.016129  |
| O | 3.017021  | -1.374483 | 0.186797  |
| C | 1.628553  | 0.555022  | -0.176525 |
| H | 1.661156  | 1.625690  | -0.274451 |
| N | 0.416551  | -0.015384 | -0.218170 |
| N | 0.239266  | -1.279929 | -0.128930 |
| O | 3.901558  | 0.692367  | -0.014901 |
| C | 5.172808  | 0.086304  | 0.165060  |
| H | 5.901144  | 0.894942  | 0.114724  |
| H | 5.230007  | -0.418994 | 1.132512  |
| H | 5.366790  | -0.651064 | -0.617956 |
| C | -3.288804 | 1.241886  | 0.079509  |
| C | -3.656518 | -1.190922 | 0.331335  |
| C | -4.382059 | 0.146527  | 0.046241  |
| H | -4.816108 | 0.108978  | -0.956474 |
| H | -5.194302 | 0.342211  | 0.748510  |
| H | -3.441139 | 2.013254  | -0.681950 |
| H | -4.060253 | -2.021878 | -0.255872 |
| C | -2.031711 | 0.437566  | -0.143350 |
| C | -2.224867 | -0.870426 | -0.016006 |
| C | -0.706923 | 1.027241  | -0.455462 |
| H | -0.602918 | 1.294744  | -1.511531 |
| C | -1.103702 | -1.830448 | -0.158053 |
| H | -1.216301 | -2.400192 | -1.094100 |
| H | -1.144704 | -2.585002 | 0.638981  |
| H | -3.727555 | -1.485457 | 1.386380  |
| H | -3.254051 | 1.761022  | 1.045630  |
| O | -0.455548 | 2.192850  | 0.256203  |
| H | -0.576355 | 2.006796  | 1.197221  |

**TS-[4+2]-4c**

|   |           |           |           |
|---|-----------|-----------|-----------|
| C | 2.739554  | 0.041702  | -0.114655 |
| O | 2.857065  | 1.180470  | -0.513012 |
| C | 1.521052  | -0.570464 | 0.383311  |
| H | 1.482591  | -1.588548 | 0.730886  |
| N | 0.431513  | 0.169758  | 0.430599  |
| N | 0.048201  | 1.255308  | 0.128326  |
| O | 3.766685  | -0.842941 | -0.076801 |
| C | 5.002119  | -0.320470 | -0.550122 |
| H | 5.722570  | -1.133193 | -0.468203 |
| H | 4.910782  | 0.006978  | -1.588407 |
| H | 5.317821  | 0.532942  | 0.054576  |
| C | -2.854163 | -1.518727 | -0.502197 |
| C | -3.232857 | 0.843104  | -0.918618 |
| C | -3.887593 | -0.539145 | -1.086938 |
| H | -4.804154 | -0.579887 | -0.490093 |
| H | -4.150753 | -0.764235 | -2.121867 |
| H | -3.300549 | -2.437206 | -0.113656 |
| H | -3.954439 | 1.661371  | -0.848744 |
| C | -2.165634 | -0.692968 | 0.567885  |
| C | -2.399220 | 0.675451  | 0.330677  |
| C | -1.164488 | -1.111490 | 1.404612  |
| H | -0.862922 | -0.522505 | 2.263769  |
| C | -1.594976 | 1.658508  | 0.902760  |
| H | -1.268859 | 1.553262  | 1.933122  |
| H | -1.711441 | 2.687017  | 0.577678  |
| H | -2.562562 | 1.065702  | -1.760744 |

|   |           |           |           |
|---|-----------|-----------|-----------|
| H | -2.116863 | -1.804617 | -1.263314 |
| H | -0.831980 | -2.145781 | 1.400748  |

**TS-[4+2]-4c-product**

|   |           |           |           |
|---|-----------|-----------|-----------|
| C | -2.835798 | 0.052800  | -0.008947 |
| O | -2.996955 | 1.252788  | -0.014653 |
| C | -1.606331 | -0.705002 | 0.004339  |
| H | -1.648869 | -1.781874 | 0.010384  |
| N | -0.380867 | -0.153497 | 0.012099  |
| N | -0.187564 | 1.106950  | 0.003698  |
| O | -3.884758 | -0.824024 | -0.013195 |
| C | -5.159670 | -0.199345 | -0.024545 |
| H | -5.890448 | -1.007462 | -0.026120 |
| H | -5.291708 | 0.432383  | 0.857439  |
| H | -5.279740 | 0.424806  | -0.913558 |
| C | 3.340227  | -1.439360 | 0.092008  |
| C | 3.754254  | 0.996571  | 0.078783  |
| C | 4.415726  | -0.370293 | -0.219166 |
| H | 4.669210  | -0.419909 | -1.281377 |
| H | 5.336261  | -0.525070 | 0.346419  |
| H | 3.363072  | -2.273144 | -0.618095 |
| H | 4.050461  | 1.770204  | -0.637097 |
| C | 2.065935  | -0.637219 | 0.023072  |
| C | 2.283552  | 0.671706  | 0.015855  |
| C | 0.702151  | -1.211608 | 0.034477  |
| H | 0.516557  | -1.848710 | -0.835639 |
| C | 1.162437  | 1.644262  | 0.015291  |
| H | 1.240143  | 2.316842  | -0.851142 |
| H | 1.233421  | 2.304460  | 0.892477  |
| H | 4.014955  | 1.372053  | 1.076885  |
| H | 3.465873  | -1.872462 | 1.093212  |
| H | 0.518626  | -1.811469 | 0.931424  |

**TS-[4+2]-4d**

|   |           |           |           |
|---|-----------|-----------|-----------|
| C | -2.935238 | -0.490087 | -0.155574 |
| O | -3.115375 | -1.672005 | 0.033462  |
| C | -1.660889 | 0.209613  | -0.018054 |
| H | -1.558273 | 1.264555  | -0.215220 |
| N | -0.614575 | -0.486659 | 0.343603  |
| N | -0.272080 | -1.616396 | 0.527299  |
| O | -3.911546 | 0.369846  | -0.519005 |
| C | -5.192180 | -0.232664 | -0.679790 |
| H | -5.865096 | 0.570207  | -0.976324 |
| H | -5.157667 | -1.008254 | -1.448046 |
| H | -5.523803 | -0.685637 | 0.257226  |
| C | 2.938022  | 0.272967  | -1.075090 |
| C | 2.934925  | -2.065158 | -0.403036 |
| C | 3.792683  | -1.006232 | -1.117603 |
| H | 4.716195  | -0.847886 | -0.551749 |
| H | 4.068793  | -1.297623 | -2.132386 |
| H | 3.513521  | 1.199970  | -1.089372 |
| H | 3.521171  | -2.859770 | 0.066800  |
| C | 2.126593  | 0.105989  | 0.191739  |
| C | 2.145709  | -1.246681 | 0.589674  |
| C | 1.246043  | 1.002032  | 0.751099  |
| H | 0.850615  | 0.818856  | 1.746050  |
| C | 1.216023  | -1.765903 | 1.502242  |
| H | 0.932912  | -1.178217 | 2.371098  |



|   |           |           |           |
|---|-----------|-----------|-----------|
| H | 1.224999  | -2.835337 | 1.686683  |
| H | 2.234470  | -2.543662 | -1.102394 |
| H | 2.248908  | 0.328595  | -1.926311 |
| C | 0.973712  | 2.340719  | 0.175741  |
| O | 1.408715  | 2.679686  | -0.909101 |
| C | 0.115828  | 3.262033  | 1.016177  |
| H | -0.788019 | 2.747584  | 1.357944  |
| H | 0.672822  | 3.559411  | 1.911272  |
| H | -0.146702 | 4.148609  | 0.440421  |

**TS-[4+2]-4d-product**

|   |           |           |           |
|---|-----------|-----------|-----------|
| C | -2.786236 | -0.564049 | -0.125978 |
| O | -2.966604 | -1.740341 | 0.090783  |
| C | -1.575690 | 0.218299  | 0.025695  |
| H | -1.603599 | 1.258984  | -0.242406 |
| N | -0.403052 | -0.311496 | 0.402451  |
| N | -0.225076 | -1.555066 | 0.618501  |
| O | -3.780069 | 0.262573  | -0.561572 |
| C | -5.032416 | -0.383120 | -0.744690 |
| H | -5.719106 | 0.387324  | -1.093062 |
| H | -4.950909 | -1.184489 | -1.482994 |
| H | -5.387331 | -0.815443 | 0.194117  |
| C | 3.041237  | 0.678112  | -0.843903 |
| C | 3.405705  | -1.733686 | -0.428075 |
| C | 4.128935  | -0.423847 | -0.825301 |
| H | 4.868689  | -0.181779 | -0.056692 |
| H | 4.656692  | -0.506312 | -1.777225 |
| H | 3.419381  | 1.647643  | -0.506134 |
| H | 4.028291  | -2.388495 | 0.189515  |
| C | 1.994740  | 0.082845  | 0.066226  |
| C | 2.188660  | -1.214742 | 0.291332  |
| C | 0.755135  | 0.672208  | 0.652170  |
| H | 0.816910  | 0.666374  | 1.749810  |
| C | 1.124363  | -1.957958 | 1.030713  |
| H | 1.238039  | -1.801605 | 2.117834  |
| H | 1.176251  | -3.035745 | 0.864739  |
| H | 3.098470  | -2.318043 | -1.305059 |
| H | 2.622540  | 0.837962  | -1.842992 |
| C | 0.443903  | 2.099884  | 0.181853  |
| O | 0.700092  | 2.437863  | -0.947908 |
| C | -0.137051 | 3.033862  | 1.213545  |
| H | -0.975221 | 2.556743  | 1.729531  |
| H | 0.628512  | 3.255301  | 1.965557  |
| H | -0.455777 | 3.959899  | 0.736846  |

**TS-[4+2]-4e**

|   |           |           |           |
|---|-----------|-----------|-----------|
| C | -2.964357 | -0.466528 | -0.172118 |
| O | -3.123443 | -1.665402 | -0.194362 |
| C | -1.691642 | 0.219164  | 0.063967  |
| H | -1.606998 | 1.294176  | 0.107031  |
| N | -0.645687 | -0.516559 | 0.305957  |
| N | -0.251790 | -1.645195 | 0.325623  |
| O | -3.956031 | 0.428426  | -0.360444 |
| C | -5.233812 | -0.154876 | -0.600210 |
| H | -5.921262 | 0.677957  | -0.737871 |
| H | -5.206773 | -0.783042 | -1.493233 |
| H | -5.539768 | -0.769613 | 0.249167  |
| C | 3.016170  | 0.348145  | -0.954568 |

|   |           |           |           |
|---|-----------|-----------|-----------|
| C | 2.971163  | -2.027045 | -0.425763 |
| C | 3.868197  | -0.931325 | -1.026553 |
| H | 4.759022  | -0.811404 | -0.402073 |
| H | 4.200019  | -1.161954 | -2.040293 |
| H | 3.595818  | 1.268366  | -0.871346 |
| H | 3.531313  | -2.847941 | 0.030813  |
| C | 2.127272  | 0.108161  | 0.248620  |
| C | 2.125283  | -1.265969 | 0.565789  |
| C | 1.218096  | 0.977270  | 0.801135  |
| H | 0.744634  | 0.776240  | 1.754622  |
| C | 1.147526  | -1.845235 | 1.391614  |
| H | 0.809931  | -1.311554 | 2.276048  |
| H | 1.163165  | -2.923434 | 1.516315  |
| H | 2.313522  | -2.464248 | -1.190649 |
| H | 2.382827  | 0.462855  | -1.842613 |
| C | 0.984987  | 2.313667  | 0.235170  |
| O | 1.553969  | 2.806973  | -0.712485 |
| O | -0.005284 | 2.961880  | 0.893418  |
| H | -0.110093 | 3.818283  | 0.451506  |

**TS-[4+2]-4e-product**

|   |           |           |           |
|---|-----------|-----------|-----------|
| C | -2.973980 | -0.373248 | 0.157707  |
| O | -3.180949 | -1.304524 | -0.586364 |
| C | -1.716363 | 0.250844  | 0.506715  |
| H | -1.710564 | 1.076386  | 1.197776  |
| N | -0.534355 | -0.125245 | -0.008070 |
| N | -0.387824 | -1.087151 | -0.831999 |
| O | -3.976232 | 0.268012  | 0.826809  |
| C | -5.271564 | -0.252414 | 0.563910  |
| H | -5.961717 | 0.345310  | 1.158173  |
| H | -5.514044 | -0.171767 | -0.498557 |
| H | -5.333007 | -1.305051 | 0.851048  |
| C | 3.073180  | 0.168996  | 1.387934  |
| C | 3.411301  | -1.657077 | -0.257646 |
| C | 3.921847  | -1.094749 | 1.093940  |
| H | 3.738098  | -1.834259 | 1.877525  |
| H | 4.992900  | -0.885245 | 1.083522  |
| H | 2.817037  | 0.264430  | 2.448169  |
| H | 3.375547  | -2.750811 | -0.271248 |
| C | 1.873719  | -0.059606 | 0.509708  |
| C | 2.048980  | -1.027263 | -0.384402 |
| C | 0.610560  | 0.735083  | 0.460882  |
| H | 0.346000  | 1.150922  | 1.433709  |
| C | 0.953870  | -1.344880 | -1.346675 |
| H | 0.965982  | -2.401379 | -1.629141 |
| H | 1.087736  | -0.768284 | -2.276072 |
| H | 4.047257  | -1.349344 | -1.097557 |
| H | 3.588988  | 1.093845  | 1.100257  |
| C | 0.790627  | 1.857374  | -0.552174 |
| O | 0.442447  | 1.823880  | -1.700467 |
| O | 1.472517  | 2.871698  | 0.004427  |
| H | 1.619707  | 3.531120  | -0.691766 |

**TS-[4+2]-4f**

|   |          |           |           |
|---|----------|-----------|-----------|
| C | 2.872999 | -0.315726 | 0.133039  |
| O | 3.011038 | -1.517076 | 0.167169  |
| C | 1.609169 | 0.385101  | -0.109151 |
| H | 1.530442 | 1.462213  | -0.126757 |

|   |           |           |           |
|---|-----------|-----------|-----------|
| N | 0.553047  | -0.344021 | -0.327666 |
| N | 0.139176  | -1.464252 | -0.313225 |
| O | 3.876455  | 0.565392  | 0.309113  |
| C | 5.146879  | -0.032035 | 0.555608  |
| H | 5.844804  | 0.793613  | 0.682087  |
| H | 5.111592  | -0.647924 | 1.456790  |
| H | 5.443467  | -0.661433 | -0.286261 |
| C | -2.961349 | 0.766411  | 0.937342  |
| C | -3.085639 | -1.637635 | 0.582521  |
| C | -3.886616 | -0.447179 | 1.141431  |
| H | -4.796645 | -0.312929 | 0.549015  |
| H | -4.181530 | -0.584092 | 2.182867  |
| H | -3.493782 | 1.713239  | 0.819120  |
| H | -3.718179 | -2.450153 | 0.214657  |
| C | -2.162973 | 0.383524  | -0.288679 |
| C | -2.244175 | -1.004980 | -0.500629 |
| C | -1.232443 | 1.165085  | -0.931303 |
| H | -0.814378 | 0.884993  | -1.891272 |
| C | -1.322306 | -1.684145 | -1.312066 |
| H | -0.993730 | -1.231676 | -2.244005 |
| H | -1.378037 | -2.767128 | -1.353527 |
| H | -2.419576 | -2.060155 | 1.347949  |
| H | -2.271874 | 0.884108  | 1.783292  |
| C | -0.937305 | 2.489134  | -0.488038 |
| N | -0.655076 | 3.549055  | -0.111204 |

**TS-[4+2]-4f-product**

|   |           |           |           |
|---|-----------|-----------|-----------|
| C | -2.877185 | -0.291608 | 0.129763  |
| O | -3.040027 | -1.308820 | -0.503432 |
| C | -1.642752 | 0.419755  | 0.399597  |
| H | -1.670626 | 1.328782  | 0.976341  |
| N | -0.449833 | 0.028312  | -0.070817 |
| N | -0.263249 | -1.012463 | -0.783835 |
| O | -3.900517 | 0.378438  | 0.727098  |
| C | -5.176469 | -0.218606 | 0.533660  |
| H | -5.887134 | 0.416393  | 1.060688  |
| H | -5.422895 | -0.268038 | -0.529587 |
| H | -5.194503 | -1.232831 | 0.939693  |
| C | 3.177713  | 0.653751  | 1.220002  |
| C | 3.569749  | -1.355221 | -0.177536 |
| C | 4.077013  | -0.600360 | 1.076870  |
| H | 3.938491  | -1.237007 | 1.954401  |
| H | 5.136725  | -0.348118 | 1.014928  |
| H | 2.945789  | 0.885962  | 2.264500  |
| H | 3.594202  | -2.442203 | -0.054341 |
| C | 1.970129  | 0.251145  | 0.417624  |
| C | 2.172470  | -0.817520 | -0.343798 |
| C | 0.673747  | 0.984145  | 0.314169  |
| H | 0.384118  | 1.435415  | 1.265618  |
| C | 1.089752  | -1.309707 | -1.241121 |
| H | 1.131252  | -2.397223 | -1.353527 |
| H | 1.224113  | -0.894483 | -2.253619 |
| H | 4.166992  | -1.120389 | -1.067655 |
| H | 3.644706  | 1.547592  | 0.786942  |
| C | 0.739595  | 2.041956  | -0.708814 |
| N | 0.840303  | 2.873127  | -1.504808 |

**TS-[4+2]-5a**

|   |           |           |           |
|---|-----------|-----------|-----------|
| C | -3.065924 | -0.698719 | -0.196167 |
| O | -3.247379 | -1.888284 | -0.040579 |
| C | -1.840373 | 0.022308  | 0.062836  |
| H | -1.751932 | 1.086958  | -0.083337 |
| N | -0.805823 | -0.643088 | 0.542479  |
| N | -0.443138 | -1.729133 | 0.848587  |
| O | -4.034580 | 0.141739  | -0.654571 |
| C | -5.270932 | -0.499695 | -0.935195 |
| H | -5.942604 | 0.281721  | -1.289606 |
| H | -5.144520 | -1.269717 | -1.700201 |
| H | -5.676227 | -0.972340 | -0.037152 |
| C | 1.853451  | 0.313525  | 0.251693  |
| C | 2.055217  | -1.000876 | 0.731019  |
| C | 3.012402  | -1.949662 | 0.031930  |
| C | 3.562683  | -1.432044 | -1.293861 |
| C | 3.940119  | 0.038282  | -1.147694 |
| C | 2.671861  | 0.854555  | -0.910944 |
| H | 3.850205  | -2.144193 | 0.715223  |
| H | 4.421064  | -2.036320 | -1.601314 |
| H | 4.628693  | 0.158816  | -0.301736 |
| H | 2.922681  | 1.901658  | -0.704446 |
| C | 0.879111  | 1.103661  | 0.862955  |
| C | 1.264452  | -1.555988 | 1.736940  |
| H | 0.586654  | 0.878475  | 1.884446  |
| H | 1.462226  | -2.583423 | 2.025546  |
| H | 0.845021  | -0.953266 | 2.533866  |
| H | 2.501757  | -2.909155 | -0.106113 |
| H | 2.802260  | -1.529111 | -2.078543 |
| H | 4.453112  | 0.407992  | -2.040353 |
| H | 2.096089  | 0.850116  | -1.844191 |
| N | 0.363376  | 2.271279  | 0.410132  |
| C | 0.212483  | 2.560841  | -1.009008 |
| H | 0.076515  | 1.625933  | -1.556956 |
| H | -0.689570 | 3.163994  | -1.143466 |
| H | 1.060742  | 3.112937  | -1.425137 |
| C | -0.349665 | 3.152794  | 1.319202  |
| H | 0.059688  | 4.167167  | 1.267739  |
| H | -1.417238 | 3.193524  | 1.073715  |
| H | -0.239166 | 2.793288  | 2.342587  |

**TS-[4+2]-5a-product**

|   |           |           |           |
|---|-----------|-----------|-----------|
| C | -3.036416 | -0.642801 | -0.149284 |
| O | -3.171985 | -1.843846 | -0.081495 |
| C | -1.858840 | 0.162537  | 0.086118  |
| H | -1.929413 | 1.226678  | -0.020190 |
| N | -0.675326 | -0.348869 | 0.445459  |
| N | -0.465154 | -1.595740 | 0.609815  |
| O | -4.070363 | 0.187908  | -0.487369 |
| C | -5.292273 | -0.487512 | -0.743430 |
| H | -6.016605 | 0.285835  | -0.997626 |
| H | -5.181796 | -1.192918 | -1.570930 |
| H | -5.622292 | -1.043865 | 0.137568  |
| C | 1.756670  | 0.133226  | 0.141126  |
| C | 1.965372  | -1.174388 | 0.317397  |
| C | 3.206482  | -1.892455 | -0.139313 |
| C | 4.099216  | -1.005897 | -1.008952 |
| C | 4.178529  | 0.405092  | -0.426043 |
| C | 2.797449  | 1.061934  | -0.439982 |

|   |           |           |           |
|---|-----------|-----------|-----------|
| H | 3.758942  | -2.236257 | 0.747128  |
| H | 5.095051  | -1.448907 | -1.100682 |
| H | 4.544774  | 0.349263  | 0.606755  |
| H | 2.798801  | 1.996980  | 0.130879  |
| C | 0.474771  | 0.697831  | 0.717179  |
| C | 0.888226  | -1.942615 | 1.026452  |
| H | 0.526314  | 0.666854  | 1.813783  |
| H | 0.989179  | -3.017256 | 0.856176  |
| H | 0.992963  | -1.791097 | 2.116563  |
| H | 2.915836  | -2.800219 | -0.681429 |
| H | 3.677805  | -0.949280 | -2.020105 |
| H | 4.888840  | 1.018081  | -0.988518 |
| H | 2.540052  | 1.339002  | -1.470516 |
| N | 0.193664  | 2.020448  | 0.327779  |
| C | 0.049443  | 2.345474  | -1.080693 |
| H | 0.295668  | 1.475964  | -1.693023 |
| H | -0.981635 | 2.634533  | -1.324560 |
| H | 0.711577  | 3.174968  | -1.357701 |
| C | -0.478601 | 2.923723  | 1.237412  |
| H | -0.105159 | 3.941292  | 1.079130  |
| H | -1.571537 | 2.941323  | 1.109285  |
| H | -0.261049 | 2.640763  | 2.269635  |

**TS-[4+2]-5b**

|   |           |           |           |
|---|-----------|-----------|-----------|
| C | 2.997534  | -0.223596 | 0.189953  |
| O | 3.175976  | -1.422415 | 0.233352  |
| C | 1.769639  | 0.444161  | -0.193580 |
| H | 1.671297  | 1.517432  | -0.239210 |
| N | 0.747598  | -0.304077 | -0.553555 |
| N | 0.398001  | -1.436617 | -0.655413 |
| O | 3.958177  | 0.680864  | 0.510091  |
| C | 5.196162  | 0.100031  | 0.898822  |
| H | 5.861427  | 0.932841  | 1.123643  |
| H | 5.067107  | -0.534561 | 1.778929  |
| H | 5.607831  | -0.510648 | 0.091690  |
| C | -1.847687 | 0.608382  | -0.489009 |
| C | -2.077360 | -0.771098 | -0.666491 |
| C | -2.984030 | -1.529092 | 0.280927  |
| C | -3.257204 | -0.790544 | 1.589293  |
| C | -3.649134 | 0.654348  | 1.294491  |
| C | -2.471754 | 1.387606  | 0.654342  |
| H | -3.938056 | -1.718114 | -0.230573 |
| H | -4.045073 | -1.302667 | 2.148801  |
| H | -4.505599 | 0.667365  | 0.609228  |
| H | -2.793999 | 2.374190  | 0.295980  |
| C | -0.844218 | 1.221543  | -1.217725 |
| C | -1.281706 | -1.507824 | -1.545174 |
| H | -0.498536 | 0.868821  | -2.180743 |
| H | -1.432459 | -2.581073 | -1.592176 |
| H | -0.916554 | -1.079006 | -2.471607 |
| H | -2.538445 | -2.510186 | 0.474991  |
| H | -2.355590 | -0.801645 | 2.214011  |
| H | -3.955674 | 1.176570  | 2.205001  |
| H | -1.710510 | 1.560998  | 1.431585  |
| O | -0.402236 | 2.466738  | -0.977053 |
| H | -0.693148 | 2.759525  | -0.102994 |

**TS-[4+2]-5b-product**

|   |           |           |           |
|---|-----------|-----------|-----------|
| C | 3.014467  | -0.202249 | 0.163976  |
| O | 3.141458  | -1.399983 | 0.281474  |
| C | 1.846655  | 0.557811  | -0.231289 |
| H | 1.904103  | 1.628234  | -0.302597 |
| N | 0.691191  | -0.016766 | -0.579136 |
| N | 0.498401  | -1.279362 | -0.648803 |
| O | 4.032820  | 0.669230  | 0.424045  |
| C | 5.239626  | 0.042762  | 0.833862  |
| H | 5.955165  | 0.847503  | 0.998883  |
| H | 5.088897  | -0.528528 | 1.753320  |
| H | 5.604432  | -0.640008 | 0.062492  |
| C | -1.714210 | 0.448968  | -0.262439 |
| C | -1.925778 | -0.867366 | -0.314254 |
| C | -3.120230 | -1.537592 | 0.307354  |
| C | -3.883000 | -0.587238 | 1.233628  |
| C | -4.034487 | 0.792154  | 0.590334  |
| C | -2.665374 | 1.437599  | 0.363973  |
| H | -3.780084 | -1.903885 | -0.491772 |
| H | -4.861728 | -1.007866 | 1.481043  |
| H | -4.542556 | 0.685471  | -0.375970 |
| H | -2.752430 | 2.322296  | -0.275978 |
| C | -0.463368 | 0.946909  | -0.936082 |
| C | -0.862571 | -1.673362 | -1.007221 |
| H | -0.529089 | 0.858665  | -2.027138 |
| H | -0.942027 | -2.734428 | -0.760828 |
| H | -0.999385 | -1.595576 | -2.100978 |
| H | -2.787897 | -2.426622 | 0.855613  |
| H | -3.330244 | -0.483215 | 2.175313  |
| H | -4.655989 | 1.443178  | 1.211585  |
| H | -2.266501 | 1.793510  | 1.325808  |
| O | -0.154492 | 2.264135  | -0.665100 |
| H | -0.180487 | 2.396741  | 0.292382  |

**TS-[4+2]-5c**

|   |           |           |           |
|---|-----------|-----------|-----------|
| C | -2.982992 | 0.014464  | -0.162587 |
| O | -3.104309 | 1.064023  | -0.757126 |
| C | -1.782635 | -0.459959 | 0.500496  |
| H | -1.735120 | -1.401894 | 1.018925  |
| N | -0.719093 | 0.318814  | 0.473900  |
| N | -0.332343 | 1.345333  | 0.021008  |
| O | -3.988257 | -0.886306 | -0.030825 |
| C | -5.204806 | -0.495691 | -0.655757 |
| H | -5.909576 | -1.305684 | -0.472633 |
| H | -5.576327 | 0.438646  | -0.228441 |
| H | -5.058954 | -0.350544 | -1.728754 |
| C | 2.131563  | 0.839241  | 0.414501  |
| C | 1.893625  | -0.469892 | 0.899961  |
| C | 2.602995  | -1.662556 | 0.286634  |
| C | 3.093395  | -1.399995 | -1.135689 |
| C | 3.897229  | -0.102717 | -1.165585 |
| C | 2.999480  | 1.078463  | -0.804162 |
| H | 3.466494  | -1.911695 | 0.917902  |
| H | 3.697058  | -2.243237 | -1.483633 |
| H | 4.724103  | -0.175497 | -0.447797 |
| H | 3.595124  | 1.985238  | -0.654539 |
| C | 1.291515  | 1.877246  | 0.817962  |
| C | 0.848277  | -0.680841 | 1.768404  |
| H | 0.901878  | 1.925253  | 1.828408  |

|   |          |           |           |
|---|----------|-----------|-----------|
| H | 0.533034 | -1.695696 | 1.995804  |
| H | 0.484714 | 0.079200  | 2.448520  |
| H | 1.936438 | -2.530150 | 0.319636  |
| H | 2.234324 | -1.312654 | -1.812441 |
| H | 4.342727 | 0.062826  | -2.150636 |
| H | 2.322102 | 1.290688  | -1.644446 |
| H | 1.416687 | 2.847868  | 0.348306  |

**TS-[4+2]-5c-product**

|   |           |           |           |
|---|-----------|-----------|-----------|
| C | -3.032811 | 0.031522  | -0.121864 |
| O | -3.189822 | 1.182351  | -0.462416 |
| C | -1.839276 | -0.614208 | 0.377809  |
| H | -1.874231 | -1.655595 | 0.647610  |
| N | -0.671634 | 0.023174  | 0.545572  |
| N | -0.466975 | 1.251060  | 0.258176  |
| O | -4.041573 | -0.888201 | -0.163184 |
| C | -5.275799 | -0.370847 | -0.638627 |
| H | -5.978382 | -1.203233 | -0.618684 |
| H | -5.629051 | 0.441989  | 0.000783  |
| H | -5.169741 | 0.014744  | -1.655677 |
| C | 1.971481  | 0.753680  | 0.176998  |
| C | 1.727796  | -0.528963 | 0.449316  |
| C | 2.650896  | -1.661084 | 0.084179  |
| C | 3.709259  | -1.199414 | -0.921391 |
| C | 4.304860  | 0.146880  | -0.503760 |
| C | 3.226828  | 1.233116  | -0.497431 |
| H | 3.136196  | -2.052215 | 0.989692  |
| H | 4.492663  | -1.956775 | -1.015959 |
| H | 4.729707  | 0.054053  | 0.503504  |
| H | 3.590405  | 2.135930  | 0.008786  |
| C | 0.884715  | 1.728150  | 0.542162  |
| C | 0.429745  | -0.806899 | 1.146520  |
| H | 0.968852  | 1.989273  | 1.612491  |
| H | 0.134952  | -1.853512 | 1.085993  |
| H | 0.464490  | -0.510433 | 2.202184  |
| H | 2.067087  | -2.492152 | -0.330362 |
| H | 3.241810  | -1.092108 | -1.907690 |
| H | 5.122453  | 0.431082  | -1.172344 |
| H | 2.983862  | 1.540057  | -1.524269 |
| H | 0.994185  | 2.664454  | -0.010943 |

**TS-[4+2]-5d**

|   |           |           |           |
|---|-----------|-----------|-----------|
| C | -3.087149 | -0.628976 | -0.206939 |
| O | -3.227205 | -1.783772 | 0.129153  |
| C | -1.856316 | 0.145965  | -0.098133 |
| H | -1.779721 | 1.166412  | -0.437518 |
| N | -0.803918 | -0.454155 | 0.401219  |
| N | -0.413971 | -1.522334 | 0.752137  |
| O | -4.077619 | 0.124803  | -0.733104 |
| C | -5.318570 | -0.558562 | -0.878433 |
| H | -6.007528 | 0.162742  | -1.314947 |
| H | -5.205306 | -1.425759 | -1.532778 |
| H | -5.684810 | -0.900966 | 0.092073  |
| C | 1.909684  | 0.338092  | 0.305448  |
| C | 2.012987  | -0.978691 | 0.823029  |
| C | 2.897348  | -2.023327 | 0.174473  |
| C | 3.394408  | -1.633190 | -1.214467 |
| C | 3.894206  | -0.192859 | -1.186762 |

|   |           |           |           |
|---|-----------|-----------|-----------|
| C | 2.732318  | 0.753449  | -0.899195 |
| H | 3.761845  | -2.195265 | 0.831417  |
| H | 4.179881  | -2.323512 | -1.534796 |
| H | 4.665841  | -0.090680 | -0.412606 |
| H | 3.078844  | 1.780607  | -0.759728 |
| C | 0.904571  | 1.151263  | 0.801013  |
| C | 1.089957  | -1.428374 | 1.780716  |
| H | 0.493144  | 0.959366  | 1.785266  |
| H | 1.162509  | -2.465029 | 2.093814  |
| H | 0.716276  | -0.771985 | 2.558719  |
| H | 2.345832  | -2.969544 | 0.139741  |
| H | 2.573400  | -1.716323 | -1.936993 |
| H | 4.357697  | 0.082501  | -2.138187 |
| H | 2.064217  | 0.800055  | -1.767144 |
| C | 0.484935  | 2.450165  | 0.221078  |
| O | 0.848810  | 2.840908  | -0.872924 |
| C | -0.467611 | 3.259991  | 1.075872  |
| H | -1.335802 | 2.653400  | 1.354665  |
| H | 0.030267  | 3.557977  | 2.004639  |
| H | -0.787846 | 4.146233  | 0.529670  |

**TS-[4+2]-5d-product**

|   |           |           |           |
|---|-----------|-----------|-----------|
| C | -3.000579 | -0.623504 | -0.173286 |
| O | -3.161986 | -1.782472 | 0.134041  |
| C | -1.821143 | 0.205282  | -0.026485 |
| H | -1.858182 | 1.218290  | -0.383395 |
| N | -0.658913 | -0.261091 | 0.452945  |
| N | -0.457379 | -1.480378 | 0.772122  |
| O | -3.991529 | 0.132665  | -0.727640 |
| C | -5.214879 | -0.564285 | -0.917350 |
| H | -5.901348 | 0.151628  | -1.367667 |
| H | -5.072968 | -1.424136 | -1.576516 |
| H | -5.609074 | -0.924003 | 0.036366  |
| C | 1.752254  | 0.179691  | 0.137467  |
| C | 1.962170  | -1.101354 | 0.456632  |
| C | 3.154361  | -1.893449 | -0.007022 |
| C | 3.933927  | -1.154125 | -1.095955 |
| C | 4.089752  | 0.322563  | -0.732550 |
| C | 2.724678  | 1.010166  | -0.664882 |
| H | 3.804601  | -2.099079 | 0.855258  |
| H | 4.910074  | -1.624247 | -1.245567 |
| H | 4.586921  | 0.401763  | 0.242628  |
| H | 2.825404  | 2.007184  | -0.220779 |
| C | 0.466920  | 0.741366  | 0.696803  |
| C | 0.884828  | -1.761200 | 1.274984  |
| H | 0.521512  | 0.749459  | 1.795524  |
| H | 0.984863  | -2.848178 | 1.274588  |
| H | 0.966483  | -1.436929 | 2.329071  |
| H | 2.815582  | -2.870814 | -0.369947 |
| H | 3.388461  | -1.232210 | -2.044095 |
| H | 4.724951  | 0.835262  | -1.460449 |
| H | 2.322639  | 1.177667  | -1.670217 |
| C | 0.095984  | 2.154534  | 0.226226  |
| O | 0.273681  | 2.491488  | -0.919198 |
| C | -0.480269 | 3.070426  | 1.275956  |
| H | -1.320518 | 2.578037  | 1.775477  |
| H | 0.279096  | 3.277615  | 2.037822  |
| H | -0.803795 | 4.002868  | 0.815572  |

| <b>TS-[4+2]-5e</b> |           |           |           |
|--------------------|-----------|-----------|-----------|
| C                  | -3.153149 | -0.571460 | -0.223243 |
| O                  | -3.264638 | -1.770915 | -0.112096 |
| C                  | -1.919836 | 0.191067  | -0.020791 |
| H                  | -1.879153 | 1.266333  | -0.094596 |
| N                  | -0.859953 | -0.470611 | 0.345078  |
| N                  | -0.416197 | -1.563591 | 0.519311  |
| O                  | -4.170175 | 0.252052  | -0.551593 |
| C                  | -5.412798 | -0.410115 | -0.769812 |
| H                  | -6.125430 | 0.370491  | -1.030603 |
| H                  | -5.323137 | -1.135732 | -1.581160 |
| H                  | -5.731069 | -0.935119 | 0.133566  |
| C                  | 1.918066  | 0.306268  | 0.359664  |
| C                  | 1.948832  | -1.044715 | 0.794937  |
| C                  | 2.828113  | -2.079946 | 0.125918  |
| C                  | 3.408859  | -1.622317 | -1.208097 |
| C                  | 3.969492  | -0.213498 | -1.053203 |
| C                  | 2.840165  | 0.768394  | -0.754701 |
| H                  | 3.650589  | -2.330817 | 0.810988  |
| H                  | 4.177990  | -2.325471 | -1.540008 |
| H                  | 4.703250  | -0.203386 | -0.236795 |
| H                  | 3.231711  | 1.756783  | -0.504361 |
| C                  | 0.914276  | 1.126681  | 0.838406  |
| C                  | 0.963321  | -1.528528 | 1.674324  |
| H                  | 0.396758  | 0.916871  | 1.764129  |
| H                  | 1.014679  | -2.577903 | 1.947337  |
| H                  | 0.549831  | -0.902352 | 2.457652  |
| H                  | 2.241914  | -2.997554 | 0.000671  |
| H                  | 2.620467  | -1.616881 | -1.970713 |
| H                  | 4.494394  | 0.106001  | -1.957819 |
| H                  | 2.235437  | 0.926241  | -1.655792 |
| C                  | 0.595591  | 2.444947  | 0.270111  |
| O                  | 1.140650  | 3.009535  | -0.652186 |
| O                  | -0.468412 | 2.993617  | 0.907010  |
| H                  | -0.630175 | 3.846939  | 0.476611  |

| <b>TS-[4+2]-5e-product</b> |           |           |           |
|----------------------------|-----------|-----------|-----------|
| C                          | -3.038811 | -0.574974 | -0.164116 |
| O                          | -3.193648 | -1.760699 | 0.018460  |
| C                          | -1.849754 | 0.231706  | 0.023505  |
| H                          | -1.901704 | 1.280149  | -0.204636 |
| N                          | -0.682674 | -0.277769 | 0.437390  |
| N                          | -0.486672 | -1.520728 | 0.658516  |
| O                          | -4.045525 | 0.238358  | -0.595302 |
| C                          | -5.278601 | -0.432540 | -0.813626 |
| H                          | -5.978337 | 0.329272  | -1.155060 |
| H                          | -5.166266 | -1.214239 | -1.568855 |
| H                          | -5.637675 | -0.895139 | 0.109033  |
| C                          | 1.744456  | 0.153672  | 0.169103  |
| C                          | 1.942757  | -1.146004 | 0.402238  |
| C                          | 3.146408  | -1.903889 | -0.087634 |
| C                          | 3.949885  | -1.091023 | -1.104569 |
| C                          | 4.099777  | 0.356457  | -0.635575 |
| C                          | 2.733619  | 1.039520  | -0.548306 |
| H                          | 3.776372  | -2.168615 | 0.773452  |
| H                          | 4.928944  | -1.551194 | -1.265291 |
| H                          | 4.575537  | 0.366533  | 0.353146  |

|   |           |           |           |
|---|-----------|-----------|-----------|
| H | 2.825956  | 1.999630  | -0.025378 |
| C | 0.452634  | 0.695522  | 0.733183  |
| C | 0.846702  | -1.855742 | 1.148797  |
| H | 0.485595  | 0.706624  | 1.829517  |
| H | 0.935724  | -2.940100 | 1.059451  |
| H | 0.918881  | -1.621027 | 2.226602  |
| H | 2.817379  | -2.853601 | -0.525047 |
| H | 3.425483  | -1.101411 | -2.067579 |
| H | 4.750390  | 0.917235  | -1.312509 |
| H | 2.353948  | 1.280399  | -1.547798 |
| C | 0.137368  | 2.103184  | 0.252954  |
| O | 0.184841  | 2.469040  | -0.891057 |
| O | -0.180587 | 2.905278  | 1.278504  |
| H | -0.364103 | 3.783802  | 0.909054  |

| <b>TS-[4+2]-5f</b> |           |           |           |
|--------------------|-----------|-----------|-----------|
| C                  | 3.097161  | -0.360453 | 0.188434  |
| O                  | 3.223006  | -1.562348 | 0.127277  |
| C                  | 1.854987  | 0.375123  | -0.054456 |
| H                  | 1.785885  | 1.450843  | 0.010929  |
| N                  | 0.805597  | -0.323792 | -0.384420 |
| N                  | 0.371445  | -1.427382 | -0.493872 |
| O                  | 4.099487  | 0.489076  | 0.487425  |
| C                  | 5.350418  | -0.144547 | 0.741718  |
| H                  | 6.049499  | 0.657698  | 0.971054  |
| H                  | 5.266052  | -0.834200 | 1.584369  |
| H                  | 5.681353  | -0.704433 | -0.135720 |
| C                  | -1.910168 | 0.496272  | -0.447561 |
| C                  | -2.018645 | -0.882271 | -0.741153 |
| C                  | -2.931781 | -1.786767 | 0.058257  |
| C                  | -3.395351 | -1.173180 | 1.377386  |
| C                  | -3.879606 | 0.254028  | 1.138641  |
| C                  | -2.716027 | 1.125288  | 0.672879  |
| H                  | -3.810502 | -2.024697 | -0.557756 |
| H                  | -4.184779 | -1.789693 | 1.816141  |
| H                  | -4.669457 | 0.247739  | 0.377032  |
| H                  | -3.067105 | 2.110884  | 0.351151  |
| C                  | -0.893097 | 1.226794  | -1.033581 |
| C                  | -1.075724 | -1.485473 | -1.590625 |
| H                  | -0.426679 | 0.943402  | -1.967754 |
| H                  | -1.154326 | -2.556696 | -1.745713 |
| H                  | -0.671539 | -0.957591 | -2.448061 |
| H                  | -2.412608 | -2.735389 | 0.233456  |
| H                  | -2.560398 | -1.158547 | 2.088570  |
| H                  | -4.313380 | 0.681307  | 2.046703  |
| H                  | -2.035555 | 1.307729  | 1.515458  |
| C                  | -0.565835 | 2.538729  | -0.576773 |
| N                  | -0.256242 | 3.586397  | -0.186918 |

| <b>TS-[4+2]-5f-product</b> |           |           |           |
|----------------------------|-----------|-----------|-----------|
| C                          | -3.015708 | -0.351957 | -0.163094 |
| O                          | -3.157077 | -1.551739 | -0.110108 |
| C                          | -1.836154 | 0.438696  | 0.140010  |
| H                          | -1.881881 | 1.509076  | 0.045013  |
| N                          | -0.684752 | -0.111814 | 0.534933  |
| N                          | -0.486058 | -1.367989 | 0.673530  |
| O                          | -4.013969 | 0.492376  | -0.539305 |
| C                          | -5.235084 | -0.158994 | -0.864326 |

|   |           |           |           |
|---|-----------|-----------|-----------|
| H | -5.930738 | 0.631159  | -1.143010 |
| H | -5.093111 | -0.854697 | -1.694796 |
| H | -5.615167 | -0.718932 | -0.006484 |
| C | 1.742695  | 0.330701  | 0.253559  |
| C | 1.938138  | -0.982929 | 0.385601  |
| C | 3.111999  | -1.701594 | -0.221795 |
| C | 3.839174  | -0.824879 | -1.244329 |
| C | 4.029592  | 0.593207  | -0.704083 |
| C | 2.678898  | 1.270490  | -0.459112 |
| H | 3.799628  | -2.005679 | 0.579687  |
| H | 4.802697  | -1.271946 | -1.504094 |
| H | 4.584453  | 0.546412  | 0.241055  |
| H | 2.812117  | 2.186427  | 0.127819  |
| C | 0.464158  | 0.829257  | 0.891246  |
| C | 0.858159  | -1.736083 | 1.114135  |
| H | 0.524549  | 0.743640  | 1.985081  |
| H | 0.941099  | -2.812449 | 0.953927  |
| H | 0.958503  | -1.571753 | 2.202517  |
| H | 2.760512  | -2.628607 | -0.688674 |
| H | 3.244913  | -0.780812 | -2.164903 |
| H | 4.623998  | 1.195091  | -1.396682 |
| H | 2.227447  | 1.586502  | -1.409315 |
| C | 0.185818  | 2.230401  | 0.573178  |
| N | 0.033559  | 3.351743  | 0.343283  |

**TS-[4+2]-6a**

|   |           |           |           |
|---|-----------|-----------|-----------|
| C | -2.968417 | -0.663265 | -0.025381 |
| O | -3.156831 | -1.801190 | 0.351550  |
| C | -1.751604 | 0.101742  | 0.128103  |
| H | -1.657866 | 1.115604  | -0.233639 |
| N | -0.720706 | -0.441203 | 0.746170  |
| N | -0.382235 | -1.471549 | 1.249230  |
| O | -3.922379 | 0.066109  | -0.669712 |
| C | -5.147550 | -0.626420 | -0.861954 |
| H | -5.807802 | 0.066637  | -1.382770 |
| H | -4.994925 | -1.528828 | -1.459154 |
| H | -5.583021 | -0.920143 | 0.096380  |
| C | 1.746842  | -0.656052 | -1.844490 |
| C | 2.563868  | 0.358043  | -0.988245 |
| C | 2.911609  | -1.600754 | 0.073606  |
| C | 1.982607  | -2.005512 | -1.108143 |
| H | 0.685124  | -0.397565 | -1.887482 |
| H | 2.134338  | -0.688106 | -2.867341 |
| H | 1.054374  | -2.457756 | -0.753190 |
| H | 2.493248  | -2.725025 | -1.754540 |
| C | 3.771242  | -0.510796 | -0.587553 |
| H | 4.444367  | -0.008103 | 0.111266  |
| H | 4.332680  | -0.876784 | -1.452778 |
| H | 2.798962  | 1.297721  | -1.487999 |
| H | 3.429983  | -2.435967 | 0.546865  |
| C | 1.852705  | 0.466870  | 0.355084  |
| C | 2.065803  | -0.761666 | 1.008845  |
| C | 0.897570  | 1.359017  | 0.829996  |
| H | 0.635046  | 1.272060  | 1.880461  |
| C | 1.284509  | -1.260958 | 2.054095  |
| H | 0.945423  | -0.589487 | 2.837730  |
| N | 0.349269  | 2.438070  | 0.238794  |
| C | 0.508812  | 2.737253  | -1.172030 |

|   |           |           |           |
|---|-----------|-----------|-----------|
| H | 1.391322  | 3.359429  | -1.363825 |
| H | 0.585343  | 1.812173  | -1.743279 |
| H | -0.376444 | 3.277633  | -1.516824 |
| C | -0.419769 | 3.392772  | 1.016166  |
| H | -0.589993 | 2.997991  | 2.018245  |
| H | 0.105770  | 4.351718  | 1.098797  |
| H | -1.392519 | 3.566440  | 0.545322  |
| H | 1.486613  | -2.267871 | 2.405101  |

**TS-[4+2]-6a-product**

|   |           |           |           |
|---|-----------|-----------|-----------|
| C | -2.977206 | -0.708889 | -0.092687 |
| O | -3.084581 | -1.885744 | 0.169743  |
| C | -1.848835 | 0.173199  | 0.109410  |
| H | -1.932037 | 1.201554  | -0.183962 |
| N | -0.691819 | -0.220364 | 0.648788  |
| N | -0.444747 | -1.409257 | 1.032476  |
| O | -3.994496 | 0.005685  | -0.663907 |
| C | -5.166372 | -0.756159 | -0.911820 |
| H | -5.882691 | -0.069523 | -1.362082 |
| H | -4.955305 | -1.586074 | -1.590982 |
| H | -5.566694 | -1.169005 | 0.017615  |
| C | 2.481366  | -0.210365 | -1.849258 |
| C | 2.755450  | 0.695313  | -0.601164 |
| C | 3.203467  | -1.390952 | 0.155955  |
| C | 2.772073  | -1.643235 | -1.321938 |
| H | 1.459618  | -0.113139 | -2.223565 |
| H | 3.162483  | 0.058308  | -2.661810 |
| H | 1.898999  | -2.297491 | -1.379165 |
| H | 3.585666  | -2.113959 | -1.880789 |
| C | 3.960785  | -0.055718 | 0.005376  |
| H | 4.283063  | 0.362514  | 0.961400  |
| H | 4.808821  | -0.121281 | -0.683972 |
| H | 2.890546  | 1.755235  | -0.820678 |
| H | 3.734141  | -2.222033 | 0.622628  |
| C | 1.697720  | 0.335454  | 0.425063  |
| C | 1.957930  | -0.901951 | 0.862273  |
| C | 0.408755  | 0.951318  | 0.845723  |
| H | 0.390665  | 1.016780  | 1.940140  |
| C | 0.893568  | -1.631451 | 1.606097  |
| H | 0.892518  | -1.324323 | 2.665935  |
| N | 0.084868  | 2.211517  | 0.327638  |
| C | 0.079407  | 2.466939  | -1.099970 |
| H | 0.566201  | 3.426675  | -1.309039 |
| H | 0.619129  | 1.682316  | -1.627510 |
| H | -0.939029 | 2.506873  | -1.511443 |
| C | -0.749424 | 3.110730  | 1.098979  |
| H | -0.635965 | 2.900909  | 2.164656  |
| H | -0.429420 | 4.142524  | 0.917886  |
| H | -1.817478 | 3.037340  | 0.846995  |
| H | 1.049169  | -2.712400 | 1.596504  |

**TS-[4+2]-6b**

|   |          |           |           |
|---|----------|-----------|-----------|
| C | 2.955317 | -0.215419 | 0.025584  |
| O | 3.108591 | -1.407378 | -0.137767 |
| C | 1.743172 | 0.534670  | -0.239648 |
| H | 1.667516 | 1.600889  | -0.092665 |
| N | 0.704520 | -0.111873 | -0.730062 |
| N | 0.365959 | -1.219342 | -1.024142 |

|   |           |           |           |
|---|-----------|-----------|-----------|
| O | 3.931788  | 0.599153  | 0.500833  |
| C | 5.154996  | -0.066130 | 0.787841  |
| H | 5.836014  | 0.701525  | 1.153274  |
| H | 5.007346  | -0.838704 | 1.546334  |
| H | 5.558795  | -0.538760 | -0.110687 |
| C | -1.651963 | 0.110631  | 1.837516  |
| C | -2.524385 | 0.927775  | 0.839364  |
| C | -2.891378 | -1.204995 | 0.198938  |
| C | -1.906443 | -1.359670 | 1.397079  |
| H | -0.594520 | 0.384455  | 1.775491  |
| H | -1.989462 | 0.282277  | 2.863591  |
| H | -0.989678 | -1.874232 | 1.103307  |
| H | -2.383871 | -1.933499 | 2.196185  |
| C | -3.737229 | -0.007112 | 0.668984  |
| H | -4.444423 | 0.345708  | -0.085439 |
| H | -4.257394 | -0.198311 | 1.612048  |
| H | -2.743650 | 1.954016  | 1.147361  |
| H | -3.420915 | -2.119703 | -0.070536 |
| C | -1.874321 | 0.764464  | -0.523724 |
| C | -2.094863 | -0.566166 | -0.921653 |
| C | -0.872926 | 1.538573  | -1.062107 |
| H | -0.538558 | 1.426207  | -2.087342 |
| C | -1.299863 | -1.222933 | -1.859249 |
| H | -0.985244 | -0.691264 | -2.752628 |
| H | -1.442455 | -2.288079 | -2.008331 |
| O | -0.420739 | 2.678482  | -0.513622 |
| H | -0.730671 | 2.741800  | 0.400365  |

**TS-[4+2]-6b-product**

|   |           |           |           |
|---|-----------|-----------|-----------|
| C | 2.937576  | -0.218883 | 0.081800  |
| O | 3.043697  | -1.424251 | 0.099947  |
| C | 1.802451  | 0.590987  | -0.313072 |
| H | 1.871316  | 1.662970  | -0.279446 |
| N | 0.662505  | 0.068684  | -0.771767 |
| N | 0.453647  | -1.179097 | -0.947954 |
| O | 3.947159  | 0.609618  | 0.477929  |
| C | 5.120731  | -0.069239 | 0.901015  |
| H | 5.832876  | 0.706587  | 1.179802  |
| H | 4.908715  | -0.717556 | 1.754968  |
| H | 5.524606  | -0.686295 | 0.094544  |
| C | -2.072373 | 0.463291  | 1.797401  |
| C | -2.635040 | 1.086768  | 0.476845  |
| C | -3.039630 | -1.124916 | 0.211644  |
| C | -2.334361 | -1.057478 | 1.606113  |
| H | -1.010395 | 0.685900  | 1.942426  |
| H | -2.615954 | 0.854361  | 2.662019  |
| H | -1.414701 | -1.647404 | 1.619450  |
| H | -2.997414 | -1.444296 | 2.384640  |
| C | -3.859603 | 0.179582  | 0.243038  |
| H | -4.366093 | 0.388570  | -0.701597 |
| H | -4.573852 | 0.213634  | 1.071345  |
| H | -2.811801 | 2.163438  | 0.511220  |
| H | -3.576380 | -2.054621 | 0.019488  |
| C | -1.730439 | 0.569194  | -0.619819 |
| C | -1.958263 | -0.739277 | -0.773588 |
| C | -0.456230 | 1.126268  | -1.131058 |
| H | -0.411791 | 1.140138  | -2.224557 |
| C | -0.891375 | -1.553701 | -1.420929 |

|   |           |           |           |
|---|-----------|-----------|-----------|
| H | -0.940442 | -1.442217 | -2.516378 |
| H | -0.995365 | -2.619718 | -1.209274 |
| O | -0.142883 | 2.391325  | -0.688774 |
| H | -0.320827 | 2.440286  | 0.260240  |

**TS-[4+2]-6c**

|   |           |           |           |
|---|-----------|-----------|-----------|
| C | 2.967978  | 0.013693  | -0.071323 |
| O | 3.078176  | 0.679884  | -1.078201 |
| C | 1.777028  | -0.111155 | 0.747978  |
| H | 1.745522  | -0.716101 | 1.637886  |
| N | 0.703502  | 0.571262  | 0.393813  |
| N | 0.333399  | 1.285206  | -0.485385 |
| O | 3.979048  | -0.730768 | 0.441966  |
| C | 5.186436  | -0.667565 | -0.307209 |
| H | 5.896256  | -1.309212 | 0.213128  |
| H | 5.026957  | -1.022348 | -1.328158 |
| H | 5.559972  | 0.358146  | -0.352656 |
| C | -1.790385 | -1.748946 | -0.515133 |
| C | -2.593647 | -1.192035 | 0.696226  |
| C | -2.993296 | 0.327644  | -0.926603 |
| C | -2.072249 | -0.709363 | -1.636130 |
| H | -0.726023 | -1.841630 | -0.283584 |
| H | -2.165330 | -2.738867 | -0.789606 |
| H | -1.161171 | -0.246228 | -2.020172 |
| H | -2.606555 | -1.164969 | -2.474598 |
| C | -3.823835 | -0.594944 | -0.013585 |
| H | -4.486079 | -0.048316 | 0.662723  |
| H | -4.395140 | -1.341052 | -0.573488 |
| H | -2.774203 | -1.913219 | 1.494295  |
| H | -3.536297 | 0.988801  | -1.603355 |
| C | -1.879837 | 0.078782  | 1.119643  |
| C | -2.128541 | 1.025483  | 0.102978  |
| C | -0.827934 | 0.208017  | 1.987621  |
| H | -0.496094 | 1.186042  | 2.320099  |
| C | -1.285025 | 2.115355  | -0.102765 |
| H | -0.925102 | 2.673401  | 0.756943  |
| H | -1.406196 | 2.713109  | -1.000225 |
| H | -0.486775 | -0.635577 | 2.581462  |

**TS-[4+2]-6c-product**

|   |           |           |           |
|---|-----------|-----------|-----------|
| C | 2.986606  | 0.014292  | -0.081552 |
| O | 3.129024  | 0.946282  | -0.840430 |
| C | 1.820352  | -0.361167 | 0.688210  |
| H | 1.867554  | -1.222207 | 1.332613  |
| N | 0.669280  | 0.325341  | 0.666240  |
| N | 0.452616  | 1.348712  | -0.063692 |
| O | 3.984811  | -0.881065 | 0.174505  |
| C | 5.191970  | -0.617127 | -0.525981 |
| H | 5.888201  | -1.401462 | -0.231287 |
| H | 5.027180  | -0.638876 | -1.606081 |
| H | 5.589067  | 0.365508  | -0.259568 |
| C | -2.230759 | -1.644102 | -0.850417 |
| C | -2.693389 | -1.198005 | 0.574096  |
| C | -3.114942 | 0.627619  | -0.693928 |
| C | -2.509343 | -0.385838 | -1.719957 |
| H | -1.178632 | -1.941085 | -0.860270 |
| H | -2.823195 | -2.498649 | -1.189666 |
| H | -1.605885 | 0.010919  | -2.189617 |

|   |           |           |           |
|---|-----------|-----------|-----------|
| H | -3.234141 | -0.602713 | -2.509551 |
| C | -3.913837 | -0.328953 | 0.212756  |
| H | -4.351127 | 0.171805  | 1.079507  |
| H | -4.683701 | -0.885403 | -0.330567 |
| H | -2.851045 | -2.014871 | 1.279983  |
| H | -3.652253 | 1.463392  | -1.143955 |
| C | -1.719711 | -0.111900 | 0.978289  |
| C | -1.963108 | 0.966819  | 0.225828  |
| C | -0.392830 | -0.198225 | 1.631431  |
| H | -0.317342 | 0.462566  | 2.501793  |
| C | -0.872775 | 1.976616  | 0.085900  |
| H | -0.858461 | 2.649102  | 0.958882  |
| H | -1.002496 | 2.608725  | -0.794796 |
| H | -0.107077 | -1.207014 | 1.924103  |

**TS-[4+2]-6d**

|   |           |           |           |
|---|-----------|-----------|-----------|
| C | -3.057518 | -0.574838 | -0.058813 |
| O | -3.181302 | -1.726522 | 0.294703  |
| C | -1.845030 | 0.226074  | 0.053038  |
| H | -1.789837 | 1.240987  | -0.306202 |
| N | -0.782196 | -0.333999 | 0.580890  |
| N | -0.411073 | -1.405584 | 0.958536  |
| O | -4.055309 | 0.149640  | -0.613883 |
| C | -5.279046 | -0.561812 | -0.767213 |
| H | -5.975772 | 0.137345  | -1.226972 |
| H | -5.137494 | -1.437410 | -1.404728 |
| H | -5.654182 | -0.895667 | 0.202920  |
| C | 1.911751  | -0.438487 | -1.795548 |
| C | 2.721815  | 0.431265  | -0.789633 |
| C | 2.886568  | -1.652565 | 0.078192  |
| C | 2.042426  | -1.873983 | -1.213823 |
| H | 0.877834  | -0.093505 | -1.870612 |
| H | 2.361466  | -0.368984 | -2.789363 |
| H | 1.077013  | -2.333839 | -0.993566 |
| H | 2.587018  | -2.532053 | -1.896894 |
| C | 3.846738  | -0.542955 | -0.390692 |
| H | 4.485938  | -0.159907 | 0.409255  |
| H | 4.460829  | -0.849579 | -1.242427 |
| H | 2.996419  | 1.413341  | -1.166709 |
| H | 3.325146  | -2.560230 | 0.495375  |
| C | 1.896610  | 0.431775  | 0.481602  |
| C | 2.013683  | -0.864165 | 1.030219  |
| C | 0.895693  | 1.289153  | 0.874425  |
| H | 0.504027  | 1.218097  | 1.885863  |
| C | 1.080855  | -1.373579 | 1.944567  |
| H | 0.741144  | -0.734761 | 2.755918  |
| H | 1.151658  | -2.421313 | 2.218451  |
| C | 0.497438  | 2.490756  | 0.097488  |
| O | 0.847474  | 2.654894  | -1.055905 |
| C | -0.396608 | 3.477687  | 0.813943  |
| H | -1.273392 | 2.964210  | 1.222552  |
| H | 0.142350  | 3.917432  | 1.659721  |
| H | -0.706436 | 4.262862  | 0.125614  |

**TS-[4+2]-6d-product**

|   |           |           |           |
|---|-----------|-----------|-----------|
| C | -2.957295 | -0.632824 | -0.066680 |
| O | -3.096631 | -1.769878 | 0.321959  |
| C | -1.806524 | 0.239792  | 0.058938  |

|   |           |           |           |
|---|-----------|-----------|-----------|
| H | -1.859396 | 1.223224  | -0.372271 |
| N | -0.654854 | -0.147078 | 0.624113  |
| N | -0.428029 | -1.328439 | 1.041393  |
| O | -3.946343 | 0.048482  | -0.712507 |
| C | -5.141802 | -0.698010 | -0.893673 |
| H | -5.829787 | -0.039116 | -1.421853 |
| H | -4.950316 | -1.599908 | -1.480027 |
| H | -5.562476 | -0.997072 | 0.069556  |
| C | 2.237198  | -0.234859 | -1.826030 |
| C | 2.717283  | 0.661175  | -0.640713 |
| C | 3.113149  | -1.438534 | 0.111699  |
| C | 2.494743  | -1.676513 | -1.305995 |
| H | 1.191106  | -0.038064 | -2.067999 |
| H | 2.834551  | -0.024558 | -2.717648 |
| H | 1.582635  | -2.276138 | -1.249228 |
| H | 3.208962  | -2.207608 | -1.941387 |
| C | 3.926847  | -0.155315 | -0.143508 |
| H | 4.374623  | 0.252529  | 0.765932  |
| H | 4.692242  | -0.285229 | -0.914723 |
| H | 2.882252  | 1.705006  | -0.902662 |
| H | 3.637966  | -2.298215 | 0.530535  |
| C | 1.742693  | 0.372465  | 0.483747  |
| C | 1.975800  | -0.869192 | 0.928386  |
| C | 0.422255  | 0.952994  | 0.839816  |
| H | 0.355278  | 1.105429  | 1.925028  |
| C | 0.882442  | -1.552530 | 1.677635  |
| H | 0.848015  | -1.194448 | 2.720145  |
| H | 1.011677  | -2.635238 | 1.718497  |
| C | 0.087134  | 2.262897  | 0.117454  |
| O | 0.380600  | 2.407009  | -1.045058 |
| C | -0.581032 | 3.333070  | 0.941505  |
| H | -1.468725 | 2.922837  | 1.433105  |
| H | 0.103835  | 3.666353  | 1.728752  |
| H | -0.850620 | 4.176224  | 0.307057  |

**TS-[4+2]-6e**

|   |           |           |           |
|---|-----------|-----------|-----------|
| C | -3.128255 | -0.540100 | -0.099432 |
| O | -3.215319 | -1.742783 | 0.001341  |
| C | -1.919912 | 0.249538  | 0.137128  |
| H | -1.905733 | 1.325757  | 0.065270  |
| N | -0.847915 | -0.382189 | 0.529019  |
| N | -0.418553 | -1.486503 | 0.698896  |
| O | -4.156762 | 0.261274  | -0.449580 |
| C | -5.376717 | -0.429219 | -0.703330 |
| H | -6.101758 | 0.335657  | -0.976461 |
| H | -5.249495 | -1.146370 | -1.517232 |
| H | -5.704573 | -0.968779 | 0.187990  |
| C | 2.069820  | -0.299763 | -1.777089 |
| C | 2.798599  | 0.483025  | -0.645631 |
| C | 2.892186  | -1.662898 | 0.064876  |
| C | 2.158978  | -1.778368 | -1.305404 |
| H | 1.042658  | 0.051816  | -1.901347 |
| H | 2.591566  | -0.151439 | -2.725973 |
| H | 1.181065  | -2.252290 | -1.204230 |
| H | 2.762482  | -2.378493 | -1.992500 |
| C | 3.887385  | -0.527053 | -0.236251 |
| H | 4.460476  | -0.211842 | 0.639619  |
| H | 4.567604  | -0.768578 | -1.058242 |



|   |           |           |           |
|---|-----------|-----------|-----------|
| H | 3.104943  | 1.489018  | -0.919571 |
| H | 3.295879  | -2.602868 | 0.444350  |
| C | 1.877239  | 0.393260  | 0.556351  |
| C | 1.948018  | -0.945238 | 1.005251  |
| C | 0.871403  | 1.242948  | 0.945439  |
| H | 0.382417  | 1.133143  | 1.906531  |
| C | 0.955945  | -1.528023 | 1.811159  |
| H | 0.554757  | -0.955024 | 2.643562  |
| H | 1.025232  | -2.592542 | 2.011888  |
| C | 0.554129  | 2.468054  | 0.192788  |
| O | 1.070390  | 2.837137  | -0.837706 |
| O | -0.455065 | 3.155633  | 0.775252  |
| H | -0.621103 | 3.926607  | 0.211352  |

**TS-[4+2]-6e-product**

|   |           |           |           |
|---|-----------|-----------|-----------|
| C | 3.374368  | -0.414467 | -0.093286 |
| O | 3.554074  | -1.405480 | 0.577365  |
| C | 2.128842  | 0.219205  | -0.468502 |
| H | 2.147379  | 1.106379  | -1.078630 |
| N | 0.921337  | -0.227844 | -0.079794 |
| N | 0.748977  | -1.256105 | 0.651843  |
| O | 4.403381  | 0.301925  | -0.632781 |
| C | 5.690232  | -0.220905 | -0.334943 |
| H | 6.403744  | 0.440020  | -0.825642 |
| H | 5.863268  | -0.236067 | 0.743969  |
| H | 5.791986  | -1.241111 | -0.713067 |
| C | -3.654783 | 0.881584  | -0.110371 |
| C | -2.796802 | 0.292306  | -1.275857 |
| C | -3.138540 | -1.500562 | 0.059422  |
| C | -3.866626 | -0.344778 | 0.820834  |
| H | -3.153473 | 1.707808  | 0.397870  |
| H | -4.606757 | 1.252538  | -0.500462 |
| H | -3.442296 | -0.188981 | 1.815311  |
| H | -4.928539 | -0.578201 | 0.936440  |
| C | -3.436382 | -1.106394 | -1.401916 |
| H | -2.927064 | -1.744081 | -2.127524 |
| H | -4.507982 | -1.063332 | -1.620961 |
| H | -2.760275 | 0.909249  | -2.175398 |
| H | -3.419196 | -2.505634 | 0.377227  |
| C | -1.469623 | -0.100215 | -0.660197 |
| C | -1.668541 | -1.150761 | 0.133926  |
| C | -0.207105 | 0.670934  | -0.567910 |
| H | 0.117130  | 1.096533  | -1.517331 |
| C | -0.602885 | -1.629658 | 1.049512  |
| H | -0.597276 | -2.721694 | 1.129682  |
| H | -0.785205 | -1.244936 | 2.065182  |
| C | -0.311152 | 1.775294  | 0.486252  |
| O | -0.738869 | 1.600386  | 1.596722  |
| O | 0.131741  | 2.950528  | 0.023383  |
| H | 0.063732  | 3.590788  | 0.749700  |

**TS-[4+2]-6f**

|   |          |           |           |
|---|----------|-----------|-----------|
| C | 3.074072 | -0.337566 | 0.062930  |
| O | 3.176545 | -1.539273 | -0.036622 |
| C | 1.852171 | 0.431907  | -0.175516 |
| H | 1.806742 | 1.505682  | -0.068824 |
| N | 0.790105 | -0.225388 | -0.551827 |
| N | 0.369895 | -1.336380 | -0.695776 |

|   |           |           |           |
|---|-----------|-----------|-----------|
| O | 4.088470  | 0.479566  | 0.409295  |
| C | 5.320577  | -0.189119 | 0.664983  |
| H | 6.031731  | 0.589522  | 0.935026  |
| H | 5.205533  | -0.905187 | 1.481582  |
| H | 5.656910  | -0.725777 | -0.224869 |
| C | -1.948774 | 0.051046  | 1.788688  |
| C | -2.721254 | 0.781654  | 0.649665  |
| C | -2.926181 | -1.402169 | 0.099068  |
| C | -2.117065 | -1.451881 | 1.429331  |
| H | -0.902110 | 0.364846  | 1.827554  |
| H | -2.405021 | 0.284315  | 2.754026  |
| H | -1.163018 | -1.967261 | 1.306442  |
| H | -2.697362 | -1.979039 | 2.191850  |
| C | -3.867033 | -0.213039 | 0.379306  |
| H | -4.482021 | 0.063617  | -0.480632 |
| H | -4.501321 | -0.374786 | 1.255376  |
| H | -2.982780 | 1.817544  | 0.867504  |
| H | -3.384663 | -2.349222 | -0.188895 |
| C | -1.890863 | 0.575557  | -0.598098 |
| C | -2.013890 | -0.786030 | -0.941962 |
| C | -0.884436 | 1.373001  | -1.087321 |
| H | -0.437472 | 1.189357  | -2.058052 |
| C | -1.061603 | -1.440640 | -1.740108 |
| H | -0.689886 | -0.937251 | -2.629431 |
| H | -1.145437 | -2.516328 | -1.857550 |
| C | -0.555130 | 2.619949  | -0.474020 |
| N | -0.244784 | 3.610568  | 0.042724  |

**TS-[4+2]-6f-product**

|   |           |           |           |
|---|-----------|-----------|-----------|
| C | 2.979287  | -0.351243 | 0.080941  |
| O | 3.102621  | -1.551136 | -0.002932 |
| C | 1.819645  | 0.466784  | -0.231437 |
| H | 1.879171  | 1.533302  | -0.102817 |
| N | 0.673892  | -0.050898 | -0.680970 |
| N | 0.454600  | -1.297444 | -0.843661 |
| O | 3.979330  | 0.465566  | 0.507269  |
| C | 5.181117  | -0.214086 | 0.847186  |
| H | 5.880253  | 0.556778  | 1.167824  |
| H | 5.005049  | -0.930785 | 1.652867  |
| H | 5.576703  | -0.755099 | -0.015719 |
| C | -2.159614 | 0.311939  | 1.780206  |
| C | -2.690088 | 0.941743  | 0.452010  |
| C | -3.066136 | -1.272214 | 0.153439  |
| C | -2.402971 | -1.208661 | 1.569941  |
| H | -1.108331 | 0.556650  | 1.953731  |
| H | -2.734379 | 0.692300  | 2.628888  |
| H | -1.480716 | -1.793744 | 1.608061  |
| H | -3.088608 | -1.608523 | 2.321729  |
| C | -3.897232 | 0.025897  | 0.168403  |
| H | -4.376534 | 0.237110  | -0.790079 |
| H | -4.637691 | 0.045061  | 0.973297  |
| H | -2.864844 | 2.017368  | 0.491506  |
| H | -3.586536 | -2.205455 | -0.064445 |
| C | -1.748046 | 0.438516  | -0.618130 |
| C | -1.957681 | -0.871013 | -0.793594 |
| C | -0.436214 | 0.967162  | -1.078036 |
| H | -0.371687 | 0.973978  | -2.172830 |
| C | -0.857164 | -1.673878 | -1.399135 |

|   |           |           |           |
|---|-----------|-----------|-----------|
| H | -0.845522 | -1.546579 | -2.494027 |
| H | -0.964298 | -2.742597 | -1.206940 |
| C | -0.180569 | 2.319822  | -0.583779 |
| N | -0.049012 | 3.401227  | -0.200204 |

**TS-[4+2]-7a**

|   |           |           |           |
|---|-----------|-----------|-----------|
| C | -2.957792 | -0.714906 | -0.212927 |
| O | -3.197732 | -1.892700 | -0.049897 |
| C | -1.698318 | -0.053751 | 0.043411  |
| H | -1.547224 | 1.000800  | -0.112958 |
| N | -0.706477 | -0.789075 | 0.509856  |
| N | -0.330435 | -1.850652 | 0.829932  |
| O | -3.881474 | 0.172016  | -0.673762 |
| C | -5.149227 | -0.406956 | -0.953581 |
| H | -5.779333 | 0.406502  | -1.312007 |
| H | -5.060624 | -1.185092 | -1.715475 |
| H | -5.578678 | -0.854488 | -0.054010 |
| C | 1.975177  | 0.306770  | 0.199136  |
| C | 2.233401  | -1.047796 | 0.643949  |
| C | 3.147557  | -1.836260 | -0.139243 |
| C | 3.823280  | -1.319710 | -1.198512 |
| C | 3.637074  | 0.046360  | -1.573711 |
| C | 2.736561  | 0.818635  | -0.909622 |
| H | 3.301233  | -2.868495 | 0.160870  |
| H | 4.524285  | -1.936423 | -1.751440 |
| H | 4.227211  | 0.469166  | -2.379579 |
| H | 2.638433  | 1.863191  | -1.178093 |
| C | 1.005623  | 1.065117  | 0.867749  |
| C | 1.536743  | -1.659999 | 1.678828  |
| H | 0.741855  | 0.776608  | 1.880984  |
| H | 1.767137  | -2.692167 | 1.916058  |
| H | 1.081911  | -1.100716 | 2.486452  |
| N | 0.402515  | 2.203782  | 0.476399  |
| C | 0.305438  | 2.638937  | -0.907881 |
| H | 1.053688  | 3.398990  | -1.158996 |
| H | 0.418428  | 1.778958  | -1.569723 |
| H | -0.686665 | 3.072755  | -1.064299 |
| C | -0.335923 | 3.005216  | 1.438599  |
| H | 0.110605  | 4.000894  | 1.535476  |
| H | -1.377909 | 3.116581  | 1.120828  |
| H | -0.317480 | 2.520080  | 2.414697  |

**TS-[4+2]-7a-product**

|   |           |           |           |
|---|-----------|-----------|-----------|
| C | -2.904961 | -0.640899 | -0.167878 |
| O | -3.042976 | -1.842149 | -0.122290 |
| C | -1.723161 | 0.158045  | 0.077678  |
| H | -1.795442 | 1.223871  | -0.002977 |
| N | -0.540316 | -0.360250 | 0.425255  |
| N | -0.334875 | -1.615064 | 0.554447  |
| O | -3.936851 | 0.199917  | -0.482576 |
| C | -5.163436 | -0.465317 | -0.745412 |
| H | -5.885287 | 0.316028  | -0.981084 |
| H | -5.059576 | -1.155016 | -1.586786 |
| H | -5.491183 | -1.036736 | 0.126668  |
| C | 1.883953  | 0.134244  | 0.150109  |
| C | 2.093801  | -1.234770 | 0.300244  |
| C | 3.264377  | -1.816505 | -0.178865 |
| C | 4.237517  | -1.022739 | -0.777397 |

|   |           |           |           |
|---|-----------|-----------|-----------|
| C | 4.041813  | 0.352261  | -0.894069 |
| C | 2.866540  | 0.934640  | -0.429792 |
| H | 3.413215  | -2.887441 | -0.074971 |
| H | 5.152556  | -1.473900 | -1.147014 |
| H | 4.807841  | 0.973402  | -1.346227 |
| H | 2.715547  | 2.006249  | -0.500563 |
| C | 0.601859  | 0.687879  | 0.727221  |
| C | 1.001671  | -1.986460 | 1.000053  |
| H | 0.651751  | 0.633860  | 1.822119  |
| H | 1.091342  | -3.062131 | 0.836683  |
| H | 1.092685  | -1.825031 | 2.089195  |
| N | 0.327711  | 2.018820  | 0.360487  |
| C | 0.177924  | 2.378914  | -1.040399 |
| H | 0.728544  | 3.303705  | -1.250076 |
| H | 0.572646  | 1.586489  | -1.677574 |
| H | -0.872901 | 2.540707  | -1.315883 |
| C | -0.356498 | 2.897844  | 1.286712  |
| H | 0.013396  | 3.919867  | 1.151964  |
| H | -1.448199 | 2.913291  | 1.151057  |
| H | -0.144348 | 2.593280  | 2.313854  |

**TS-[4+2]-7b**

|   |           |           |           |
|---|-----------|-----------|-----------|
| C | 2.908435  | -0.220793 | 0.210466  |
| O | 3.192193  | -1.399703 | 0.204427  |
| C | 1.619344  | 0.348148  | -0.125659 |
| H | 1.395028  | 1.399964  | -0.050828 |
| N | 0.650377  | -0.498880 | -0.422057 |
| N | 0.319800  | -1.617984 | -0.535831 |
| O | 3.794324  | 0.756136  | 0.530019  |
| C | 5.089044  | 0.276711  | 0.872259  |
| H | 5.683863  | 1.159129  | 1.104717  |
| H | 5.038726  | -0.388968 | 1.737005  |
| H | 5.530931  | -0.273845 | 0.038383  |
| C | -1.933132 | 0.558851  | -0.457738 |
| C | -2.255538 | -0.845963 | -0.426565 |
| C | -3.127364 | -1.298886 | 0.621968  |
| C | -3.691677 | -0.428226 | 1.500034  |
| C | -3.396029 | 0.971753  | 1.433280  |
| C | -2.531872 | 1.448368  | 0.500661  |
| H | -3.346118 | -2.360966 | 0.676658  |
| H | -4.372522 | -0.791048 | 2.262966  |
| H | -3.861434 | 1.648489  | 2.141960  |
| H | -2.282662 | 2.502250  | 0.449565  |
| C | -0.932326 | 1.005734  | -1.300680 |
| C | -1.597874 | -1.758127 | -1.242983 |
| H | -0.601168 | 0.438222  | -2.162679 |
| H | -1.773326 | -2.817020 | -1.091033 |
| H | -1.249790 | -1.495475 | -2.234320 |
| O | -0.496619 | 2.272835  | -1.214043 |
| H | 0.221991  | 2.417756  | -1.840660 |

**TS-[4+2]-7b-product**

|   |          |           |           |
|---|----------|-----------|-----------|
| C | 2.875023 | -0.203059 | 0.160819  |
| O | 3.059226 | -1.398230 | 0.134353  |
| C | 1.678766 | 0.541496  | -0.177874 |
| H | 1.673679 | 1.610646  | -0.071829 |
| N | 0.530112 | -0.046322 | -0.519273 |
| N | 0.334723 | -1.312265 | -0.553713 |

|   |           |           |           |
|---|-----------|-----------|-----------|
| O | 3.848902  | 0.680747  | 0.524003  |
| C | 5.083478  | 0.070188  | 0.872744  |
| H | 5.756189  | 0.884064  | 1.140462  |
| H | 4.954077  | -0.611634 | 1.716765  |
| H | 5.487230  | -0.498234 | 0.031193  |
| C | -1.845411 | 0.476547  | -0.240286 |
| C | -2.078380 | -0.896168 | -0.242827 |
| C | -3.200268 | -1.400663 | 0.406302  |
| C | -4.082899 | -0.523312 | 1.032273  |
| C | -3.839599 | 0.849683  | 1.026576  |
| C | -2.711158 | 1.361005  | 0.390856  |
| H | -3.380797 | -2.471440 | 0.424089  |
| H | -4.962578 | -0.912551 | 1.534477  |
| H | -4.529609 | 1.523218  | 1.523688  |
| H | -2.499144 | 2.424138  | 0.381008  |
| C | -0.608593 | 0.893681  | -0.970869 |
| C | -1.021081 | -1.714363 | -0.931660 |
| H | -0.693300 | 0.642612  | -2.038245 |
| H | -1.104248 | -2.771852 | -0.675770 |
| H | -1.153492 | -1.642450 | -2.026154 |
| O | -0.331217 | 2.226663  | -0.774818 |
| H | 0.283602  | 2.529941  | -1.453403 |

|   |           |           |           |
|---|-----------|-----------|-----------|
| N | 0.307246  | 1.228127  | 0.300674  |
| O | 3.884045  | -0.885088 | -0.213144 |
| C | 5.117167  | -0.346948 | -0.669749 |
| H | 5.818358  | -1.180263 | -0.692771 |
| H | 5.005892  | 0.086475  | -1.666662 |
| H | 5.474077  | 0.433980  | 0.006225  |
| C | -1.858046 | -0.590668 | 0.404175  |
| C | -2.116198 | 0.756025  | 0.160079  |
| C | -3.277024 | 1.126558  | -0.510620 |
| C | -4.181748 | 0.146252  | -0.911881 |
| C | -3.918588 | -1.200189 | -0.665008 |
| C | -2.746667 | -1.575344 | -0.013060 |
| H | -3.472270 | 2.174637  | -0.718376 |
| H | -5.091958 | 0.431888  | -1.428952 |
| H | -4.622505 | -1.958843 | -0.990145 |
| H | -2.528191 | -2.623699 | 0.169810  |
| C | -0.576596 | -0.862595 | 1.127812  |
| C | -1.039357 | 1.696516  | 0.628032  |
| H | -0.645672 | -0.563842 | 2.180658  |
| H | -1.139595 | 2.680647  | 0.167509  |
| H | -1.130010 | 1.844098  | 1.718617  |
| H | -0.270683 | -1.905295 | 1.073378  |

**TS-[4+2]-7c**

|   |           |           |           |
|---|-----------|-----------|-----------|
| C | 2.919164  | 0.022511  | -0.161307 |
| O | 3.075306  | 1.113670  | -0.666313 |
| C | 1.689250  | -0.478656 | 0.422373  |
| H | 1.595118  | -1.454632 | 0.862533  |
| N | 0.650412  | 0.336576  | 0.397552  |
| N | 0.264453  | 1.384099  | 0.036013  |
| O | 3.903731  | -0.903624 | -0.066248 |
| C | 5.147955  | -0.488536 | -0.617756 |
| H | 5.832069  | -1.323934 | -0.475365 |
| H | 5.041446  | -0.257519 | -1.680138 |
| H | 5.519453  | 0.402072  | -0.105602 |
| C | -1.988113 | -0.570787 | 0.755290  |
| C | -2.283207 | 0.784299  | 0.346431  |
| C | -3.209390 | 0.989182  | -0.732898 |
| C | -3.847903 | -0.056744 | -1.318462 |
| C | -3.568333 | -1.401654 | -0.905792 |
| C | -2.661198 | -1.649093 | 0.071738  |
| H | -3.404363 | 2.008347  | -1.052635 |
| H | -4.568348 | 0.116755  | -2.110730 |
| H | -4.081971 | -2.223420 | -1.393779 |
| H | -2.433240 | -2.666587 | 0.374733  |
| C | -0.963035 | -0.826853 | 1.637152  |
| C | -1.522979 | 1.838410  | 0.836431  |
| H | -0.601011 | -0.094882 | 2.347360  |
| H | -1.666064 | 2.828843  | 0.418335  |
| H | -1.094242 | 1.819000  | 1.830617  |
| H | -0.648465 | -1.851605 | 1.811003  |

**TS-[4+2]-7c-product**

|   |          |           |           |
|---|----------|-----------|-----------|
| C | 2.876903 | 0.031120  | -0.125570 |
| O | 3.030209 | 1.196377  | -0.412437 |
| C | 1.684902 | -0.637719 | 0.352135  |
| H | 1.722543 | -1.689929 | 0.575987  |
| N | 0.518110 | -0.010730 | 0.549511  |

**TS-[4+2]-7d**

|   |           |           |           |
|---|-----------|-----------|-----------|
| C | -2.984118 | -0.651368 | -0.215891 |
| O | -3.168998 | -1.795279 | 0.137267  |
| C | -1.725824 | 0.075383  | -0.115865 |
| H | -1.587675 | 1.078604  | -0.481983 |
| N | -0.708666 | -0.594264 | 0.379447  |
| N | -0.319909 | -1.638679 | 0.747606  |
| O | -3.942920 | 0.133448  | -0.753752 |
| C | -5.209804 | -0.502624 | -0.891652 |
| H | -5.869201 | 0.239905  | -1.338076 |
| H | -5.130381 | -1.381649 | -1.535016 |
| H | -5.589860 | -0.817780 | 0.082712  |
| C | 2.003303  | 0.314566  | 0.210151  |
| C | 2.210776  | -1.035371 | 0.689781  |
| C | 3.120177  | -1.892975 | -0.012147 |
| C | 3.841522  | -1.431200 | -1.067518 |
| C | 3.661663  | -0.087917 | -1.523347 |
| C | 2.767275  | 0.748395  | -0.930634 |
| H | 3.240799  | -2.912231 | 0.342095  |
| H | 4.554398  | -2.076377 | -1.569665 |
| H | 4.245809  | 0.264926  | -2.367240 |
| H | 2.612264  | 1.753202  | -1.298464 |
| C | 0.991067  | 1.074654  | 0.785216  |
| C | 1.390411  | -1.568988 | 1.686056  |
| H | 0.642331  | 0.817043  | 1.779195  |
| H | 1.494698  | -2.621129 | 1.928246  |
| H | 0.991248  | -0.961549 | 2.488835  |
| C | 0.479422  | 2.374912  | 0.295251  |
| O | 0.715731  | 2.818009  | -0.814715 |
| C | -0.426984 | 3.109142  | 1.260432  |
| H | -1.276785 | 2.470515  | 1.525821  |
| H | 0.111110  | 3.338662  | 2.185663  |
| H | -0.782554 | 4.029380  | 0.799112  |

**TS-[4+2]-7d-product**

|   |           |           |           |
|---|-----------|-----------|-----------|
| C | -2.863790 | -0.631705 | -0.184253 |
| O | -3.025243 | -1.787441 | 0.133026  |
| C | -1.683686 | 0.199158  | -0.038352 |
| H | -1.718927 | 1.210271  | -0.401561 |
| N | -0.522959 | -0.263697 | 0.444323  |
| N | -0.320819 | -1.485072 | 0.768436  |
| O | -3.850605 | 0.120169  | -0.748688 |
| C | -5.074080 | -0.577336 | -0.939362 |
| H | -5.757304 | 0.135869  | -1.398566 |
| H | -4.928952 | -1.442078 | -1.591249 |
| H | -5.472942 | -0.929155 | 0.015287  |
| C | 1.859675  | 0.182318  | 0.058730  |
| C | 2.090206  | -1.147418 | 0.416406  |
| C | 3.221000  | -1.810046 | -0.047815 |
| C | 4.133451  | -1.129978 | -0.849174 |
| C | 3.903501  | 0.198637  | -1.199056 |
| C | 2.762319  | 0.862672  | -0.755544 |
| H | 3.385674  | -2.850089 | 0.218231  |
| H | 5.022220  | -1.638501 | -1.208244 |
| H | 4.612561  | 0.722005  | -1.831622 |
| H | 2.577448  | 1.887597  | -1.050590 |
| C | 0.601338  | 0.741766  | 0.670289  |
| C | 1.020518  | -1.774085 | 1.267059  |
| H | 0.705918  | 0.721678  | 1.764245  |
| H | 1.110154  | -2.861113 | 1.288758  |
| H | 1.123046  | -1.425138 | 2.310701  |
| C | 0.208370  | 2.170892  | 0.269544  |
| O | 0.371766  | 2.571345  | -0.857225 |
| C | -0.376059 | 3.018882  | 1.370275  |
| H | -1.196019 | 2.481456  | 1.856696  |
| H | 0.389702  | 3.210190  | 2.129839  |
| H | -0.730054 | 3.963247  | 0.959386  |

**TS-[4+2]-7e**

|   |           |           |           |
|---|-----------|-----------|-----------|
| C | -3.105214 | -0.586381 | -0.241119 |
| O | -3.250351 | -1.787108 | -0.225093 |
| C | -1.838950 | 0.119256  | -0.031121 |
| H | -1.753822 | 1.192955  | -0.005023 |
| N | -0.803951 | -0.630378 | 0.224768  |
| N | -0.323702 | -1.699335 | 0.308753  |
| O | -4.103527 | 0.293468  | -0.452044 |
| C | -5.377811 | -0.307502 | -0.670217 |
| H | -6.071742 | 0.515739  | -0.830415 |
| H | -5.347683 | -0.961407 | -1.544325 |
| H | -5.675681 | -0.898566 | 0.198473  |
| C | 2.024071  | 0.266257  | 0.275181  |
| C | 2.117314  | -1.124928 | 0.665634  |
| C | 3.077276  | -1.972300 | 0.023438  |
| C | 3.944442  | -1.477482 | -0.898850 |
| C | 3.870958  | -0.099919 | -1.272071 |
| C | 2.944696  | 0.736132  | -0.730354 |
| H | 3.110593  | -3.018257 | 0.313489  |
| H | 4.689741  | -2.119891 | -1.355058 |
| H | 4.567607  | 0.284029  | -2.010631 |
| H | 2.885578  | 1.772641  | -1.031793 |
| C | 0.993928  | 1.045791  | 0.785639  |
| C | 1.157663  | -1.703415 | 1.507735  |
| H | 0.473995  | 0.758733  | 1.689695  |

|   |           |           |           |
|---|-----------|-----------|-----------|
| H | 1.231389  | -2.767638 | 1.705405  |
| H | 0.669352  | -1.136304 | 2.291600  |
| C | 0.643890  | 2.386666  | 0.308123  |
| O | 1.164483  | 3.038137  | -0.571648 |
| O | -0.433672 | 2.862086  | 0.985607  |
| H | -0.614810 | 3.740238  | 0.617243  |

**TS-[4+2]-7e-product**

|   |           |           |           |
|---|-----------|-----------|-----------|
| C | -2.884256 | -0.595055 | -0.183589 |
| O | -3.041558 | -1.771491 | 0.047028  |
| C | -1.698194 | 0.220454  | -0.002359 |
| H | -1.743595 | 1.259365  | -0.273076 |
| N | -0.538794 | -0.273329 | 0.445140  |
| N | -0.338814 | -1.512096 | 0.702121  |
| O | -3.879492 | 0.198604  | -0.670308 |
| C | -5.108829 | -0.480787 | -0.887163 |
| H | -5.799960 | 0.266444  | -1.274845 |
| H | -4.980463 | -1.292852 | -1.606818 |
| H | -5.487472 | -0.904475 | 0.046204  |
| C | 1.851848  | 0.170188  | 0.086133  |
| C | 2.075770  | -1.174399 | 0.383075  |
| C | 3.206072  | -1.816861 | -0.109682 |
| C | 4.121235  | -1.102494 | -0.877690 |
| C | 3.894870  | 0.240978  | -1.168588 |
| C | 2.754432  | 0.885738  | -0.696343 |
| H | 3.367797  | -2.868553 | 0.107593  |
| H | 5.009436  | -1.596140 | -1.258192 |
| H | 4.605481  | 0.790590  | -1.776530 |
| H | 2.569591  | 1.923417  | -0.945895 |
| C | 0.594049  | 0.708567  | 0.715808  |
| C | 0.997000  | -1.833129 | 1.196319  |
| H | 0.686096  | 0.680072  | 1.807703  |
| H | 1.079775  | -2.920470 | 1.166779  |
| H | 1.094332  | -1.534201 | 2.255544  |
| C | 0.239404  | 2.134105  | 0.326437  |
| O | 0.304871  | 2.591055  | -0.783703 |
| O | -0.152087 | 2.834507  | 1.398500  |
| H | -0.372048 | 3.729546  | 1.094426  |

**TS-[4+2]-7f**

|   |           |           |           |
|---|-----------|-----------|-----------|
| C | 3.030894  | -0.379057 | 0.199023  |
| O | 3.188108  | -1.578949 | 0.191081  |
| C | 1.761896  | 0.309367  | -0.039775 |
| H | 1.651412  | 1.382349  | -0.025011 |
| N | 0.736693  | -0.459813 | -0.289896 |
| N | 0.281232  | -1.541164 | -0.345601 |
| O | 4.014794  | 0.511816  | 0.424478  |
| C | 5.291356  | -0.072795 | 0.671293  |
| H | 5.971926  | 0.759831  | 0.839635  |
| H | 5.251757  | -0.721450 | 1.548951  |
| H | 5.613077  | -0.665683 | -0.187607 |
| C | -2.014756 | 0.477602  | -0.367219 |
| C | -2.193939 | -0.934886 | -0.601390 |
| C | -3.143824 | -1.651646 | 0.198193  |
| C | -3.910078 | -1.011367 | 1.120638  |
| C | -3.740228 | 0.392103  | 1.343686  |
| C | -2.819511 | 1.106868  | 0.644942  |
| H | -3.252277 | -2.718705 | 0.029358  |

|   |           |           |           |
|---|-----------|-----------|-----------|
| H | -4.648450 | -1.558359 | 1.696403  |
| H | -4.353158 | 0.887488  | 2.089543  |
| H | -2.681401 | 2.168034  | 0.826289  |
| C | -0.982254 | 1.153863  | -1.002710 |
| C | -1.312474 | -1.630962 | -1.434566 |
| H | -0.529675 | 0.790100  | -1.915891 |
| H | -1.416883 | -2.708138 | -1.507493 |
| H | -0.856919 | -1.165274 | -2.300614 |
| C | -0.603164 | 2.473178  | -0.630365 |
| N | -0.240229 | 3.528588  | -0.311437 |

**TS-[4+2]-7f-product**

|   |           |           |           |
|---|-----------|-----------|-----------|
| C | -2.884597 | -0.357494 | -0.167249 |
| O | -3.022829 | -1.557805 | -0.134916 |
| C | -1.703082 | 0.430502  | 0.142812  |
| H | -1.753484 | 1.502522  | 0.070334  |
| N | -0.546649 | -0.123445 | 0.513907  |
| N | -0.343436 | -1.385755 | 0.615797  |
| O | -3.885605 | 0.492709  | -0.518582 |
| C | -5.109242 | -0.153050 | -0.847419 |
| H | -5.806155 | 0.641960  | -1.108190 |
| H | -4.971800 | -0.834233 | -1.690472 |
| H | -5.483813 | -0.727340 | 0.003283  |
| C | 1.854083  | 0.344781  | 0.187284  |
| C | 2.072595  | -1.024993 | 0.308928  |
| C | 3.194623  | -1.594553 | -0.283291 |
| C | 4.094687  | -0.784154 | -0.970633 |
| C | 3.866485  | 0.586040  | -1.085520 |
| C | 2.735889  | 1.161236  | -0.511549 |
| H | 3.361006  | -2.664951 | -0.207985 |
| H | 4.975017  | -1.224026 | -1.427463 |
| H | 4.567066  | 1.209077  | -1.630611 |
| H | 2.545392  | 2.225882  | -0.606068 |
| C | 0.597631  | 0.816403  | 0.878064  |
| C | 0.997527  | -1.774684 | 1.044259  |
| H | 0.697721  | 0.687785  | 1.963916  |
| H | 1.070718  | -2.849469 | 0.872732  |
| H | 1.113472  | -1.618477 | 2.131857  |
| C | 0.306808  | 2.226011  | 0.622121  |
| N | 0.148927  | 3.354310  | 0.434553  |

**TS-[4+2]-7ba**

|   |           |           |           |
|---|-----------|-----------|-----------|
| C | -1.465792 | -1.111047 | 0.522245  |
| C | -1.729448 | -1.359174 | -0.876890 |
| C | -2.157163 | -2.683745 | -1.239402 |
| C | -2.338042 | -3.664220 | -0.315989 |
| C | -2.062330 | -3.412451 | 1.063165  |
| C | -1.616770 | -2.191912 | 1.460205  |
| H | -2.342414 | -2.878822 | -2.291405 |
| H | -2.684153 | -4.645579 | -0.623277 |
| H | -2.211222 | -4.200943 | 1.793193  |
| H | -1.399435 | -1.993102 | 2.502878  |
| C | -0.920284 | 0.093614  | 0.978038  |
| C | -1.347487 | -0.480950 | -1.890591 |
| H | -1.433884 | -0.828277 | -2.914758 |
| H | -1.338909 | 0.591547  | -1.772545 |
| C | 3.302981  | -0.243902 | -0.239671 |
| O | 3.590654  | -0.286414 | -1.417471 |

|   |           |           |           |
|---|-----------|-----------|-----------|
| C | 1.965871  | -0.245268 | 0.314758  |
| H | 1.755769  | -0.260111 | 1.371851  |
| N | 0.963724  | -0.348665 | -0.541433 |
| N | 0.658514  | -0.473908 | -1.667047 |
| O | 4.233057  | -0.177144 | 0.748550  |
| C | 5.575839  | -0.179582 | 0.281751  |
| H | 6.203055  | -0.127543 | 1.170991  |
| H | 5.788300  | -1.090817 | -0.282334 |
| H | 5.762380  | 0.678649  | -0.368429 |
| O | -0.346990 | 0.079621  | 2.201947  |
| H | -0.208229 | 0.989877  | 2.496363  |
| C | -1.199674 | 1.452867  | 0.448404  |
| C | -2.518772 | 1.803978  | 0.133812  |
| C | -0.192179 | 2.421587  | 0.384006  |
| C | -2.819611 | 3.102044  | -0.257021 |
| H | -3.295372 | 1.047226  | 0.191705  |
| C | -0.499896 | 3.720192  | -0.011694 |
| H | 0.835941  | 2.138810  | 0.597341  |
| C | -1.810567 | 4.062072  | -0.331276 |
| H | -3.843192 | 3.367897  | -0.499100 |
| H | 0.289298  | 4.461282  | -0.080089 |
| H | -2.047416 | 5.074794  | -0.640340 |

**TS-[4+2]-7ba-product**

|   |           |           |           |
|---|-----------|-----------|-----------|
| C | -1.579337 | -0.956229 | 0.386676  |
| C | -1.704380 | -1.320202 | -0.951063 |
| C | -2.737371 | -2.168993 | -1.336578 |
| C | -3.646187 | -2.628217 | -0.386960 |
| C | -3.512019 | -2.259771 | 0.950486  |
| C | -2.470075 | -1.425601 | 1.346723  |
| H | -2.827015 | -2.470670 | -2.376175 |
| H | -4.455942 | -3.284633 | -0.688593 |
| H | -4.215648 | -2.630400 | 1.688414  |
| H | -2.337718 | -1.144155 | 2.385238  |
| C | -0.441579 | -0.023884 | 0.713032  |
| C | -0.651446 | -0.780604 | -1.874887 |
| H | -0.606732 | -1.358766 | -2.800125 |
| H | -0.901763 | 0.256237  | -2.155005 |
| C | 3.235290  | -0.663455 | -0.043830 |
| O | 3.485741  | -0.703286 | -1.227989 |
| C | 1.949390  | -0.514645 | 0.605961  |
| H | 1.902537  | -0.402102 | 1.672511  |
| N | 0.792777  | -0.538609 | -0.064014 |
| N | 0.692753  | -0.836978 | -1.305589 |
| O | 4.208333  | -0.700396 | 0.910508  |
| C | 5.527439  | -0.789915 | 0.390497  |
| H | 6.189708  | -0.817134 | 1.254944  |
| H | 5.646475  | -1.694413 | -0.210774 |
| H | 5.756815  | 0.073451  | -0.239227 |
| O | -0.225107 | -0.041365 | 2.082259  |
| H | 0.195777  | 0.791557  | 2.332228  |
| C | -0.679616 | 1.412593  | 0.234198  |
| C | -1.860056 | 2.033426  | 0.651481  |
| C | 0.259667  | 2.134046  | -0.505262 |
| C | -2.101969 | 3.364167  | 0.333117  |
| H | -2.588782 | 1.462796  | 1.220484  |
| C | 0.006726  | 3.466028  | -0.828414 |
| H | 1.172804  | 1.658852  | -0.851588 |

|           |           |           |           |           |           |           |           |
|-----------|-----------|-----------|-----------|-----------|-----------|-----------|-----------|
| C         | -1.167248 | 4.083115  | -0.409526 | C         | 3.722418  | -1.360220 | 2.301440  |
| H         | -3.021985 | 3.837907  | 0.659095  | H         | 3.859983  | -2.248706 | 2.921812  |
| H         | 0.734981  | 4.019240  | -1.411943 | H         | 4.382192  | -0.578520 | 2.690390  |
| H         | -1.357332 | 5.120563  | -0.664393 | H         | 2.694406  | -1.009519 | 2.420452  |
| <b>A1</b> |           |           |           | C         | 5.746609  | -4.467631 | -1.107914 |
| H         | 1.688182  | -2.768128 | 0.615572  | H         | 5.371536  | -4.914690 | -2.031930 |
| O         | -0.573756 | -2.516123 | -1.157305 | H         | 6.815430  | -4.274952 | -1.246303 |
| P         | 0.062300  | -1.606443 | -0.204218 | H         | 5.643022  | -5.201147 | -0.305208 |
| O         | -0.863172 | -0.667276 | 0.718591  | C         | -3.412127 | 3.511698  | -1.974075 |
| O         | 1.002637  | -0.530311 | -0.959539 | C         | -0.665696 | 3.693860  | -1.481200 |
| O         | 0.956593  | -2.230073 | 0.956868  | C         | 0.466710  | 3.683016  | 1.454257  |
| C         | -2.767185 | 2.466080  | -1.261439 | C         | 3.207057  | 3.649228  | 2.009405  |
| C         | -3.484861 | 1.315877  | -0.846067 | C         | -2.706586 | 4.597817  | -2.418909 |
| C         | -2.867551 | 0.266754  | -0.210916 | C         | -1.314658 | 4.680306  | -2.178197 |
| C         | -1.482323 | 0.396856  | 0.064330  | C         | 1.038410  | 4.680324  | 2.201992  |
| C         | -0.735698 | 1.513767  | -0.250776 | C         | 2.426797  | 4.674454  | 2.473571  |
| C         | -1.374944 | 2.566669  | -0.983663 | H         | -4.477376 | 3.424015  | -2.167985 |
| H         | -4.549943 | 1.254213  | -1.055641 | H         | -3.207308 | 5.388976  | -2.967025 |
| C         | 2.643595  | 2.593850  | 1.244345  | H         | -0.754398 | 5.529740  | -2.554948 |
| C         | 3.436414  | 1.491868  | 0.832913  | H         | 0.403163  | 3.761992  | -1.311937 |
| C         | 2.897975  | 0.436792  | 0.140612  | H         | -0.600033 | 3.693405  | 1.261888  |
| C         | 1.524646  | 0.516408  | -0.211458 | H         | 0.418389  | 5.479333  | 2.595052  |
| C         | 0.700280  | 1.562941  | 0.138181  | H         | 2.865359  | 5.474006  | 3.061288  |
| C         | 1.254517  | 2.621378  | 0.931715  | H         | 4.270622  | 3.617808  | 2.228594  |
| H         | 4.488991  | 1.470677  | 1.104259  | <b>A2</b> |           |           |           |
| C         | 3.671044  | -0.797011 | -0.182392 | H         | 1.031673  | -2.348130 | 0.977935  |
| C         | 3.988203  | -1.107002 | -1.516106 | O         | -0.653357 | -1.760958 | -0.973934 |
| C         | 4.036242  | -1.672045 | 0.856947  | P         | -0.006135 | -0.803437 | -0.079536 |
| C         | 4.657893  | -2.297887 | -1.791584 | O         | -0.927345 | 0.199214  | 0.785777  |
| C         | 4.690971  | -2.863673 | 0.533682  | O         | 0.954123  | 0.233276  | -0.862034 |
| C         | 5.011800  | -3.192839 | -0.782583 | O         | 0.881453  | -1.400942 | 1.099411  |
| H         | 4.901894  | -2.536858 | -2.824400 | C         | -2.688375 | 3.322877  | -1.340335 |
| H         | 4.962855  | -3.547896 | 1.334606  | C         | -3.446464 | 2.194996  | -0.940768 |
| C         | -3.613657 | -0.958040 | 0.200184  | C         | -2.883073 | 1.149091  | -0.249593 |
| C         | -4.016743 | -1.895372 | -0.764046 | C         | -1.508220 | 1.256648  | 0.092524  |
| C         | -3.919868 | -1.151390 | 1.556674  | C         | -0.726863 | 2.345519  | -0.225769 |
| C         | -4.739626 | -3.012923 | -0.346545 | C         | -1.308043 | 3.399697  | -1.003469 |
| C         | -4.645870 | -2.280303 | 1.930079  | H         | -4.502355 | 2.158306  | -1.195773 |
| C         | -5.062642 | -3.223541 | 0.992108  | C         | 2.636162  | 3.338152  | 1.352131  |
| H         | -5.052282 | -3.742519 | -1.090255 | C         | 3.413740  | 2.226552  | 0.944275  |
| H         | -4.891912 | -2.426064 | 2.979748  | C         | 2.871555  | 1.188650  | 0.225521  |
| C         | -3.471803 | -0.155875 | 2.596513  | C         | 1.501400  | 1.284993  | -0.137982 |
| H         | -2.381776 | -0.169214 | 2.701001  | C         | 0.700384  | 2.354353  | 0.195929  |
| H         | -3.761680 | 0.863462  | 2.324024  | C         | 1.258578  | 3.401427  | 1.000590  |
| H         | -3.907891 | -0.389050 | 3.570060  | H         | 4.465802  | 2.196310  | 1.215780  |
| C         | -3.652247 | -1.730426 | -2.218076 | C         | 3.682026  | -0.003177 | -0.126801 |
| H         | -4.015545 | -0.783115 | -2.625921 | C         | 4.472985  | -1.639966 | -1.719746 |
| H         | -2.564564 | -1.754550 | -2.336843 | C         | 5.310408  | -1.672546 | 0.519683  |
| H         | -4.077168 | -2.542363 | -2.811837 | C         | -3.680177 | -0.052121 | 0.101939  |
| C         | -5.815373 | -4.457362 | 1.419805  | C         | -5.325830 | -1.710524 | -0.526209 |
| H         | -6.408255 | -4.268699 | 2.318195  | C         | -4.408133 | -1.731253 | 1.680141  |
| H         | -6.487966 | -4.804215 | 0.631540  | C         | -3.281197 | 4.367956  | -2.097383 |
| H         | -5.123545 | -5.275389 | 1.646228  | C         | -0.553516 | 4.502022  | -1.487548 |
| C         | 3.606544  | -0.174911 | -2.637018 | C         | 0.483456  | 4.483184  | 1.498647  |
| H         | 2.529570  | -0.219744 | -2.825532 | C         | 3.206083  | 4.376800  | 2.135006  |
| H         | 3.855326  | 0.861148  | -2.390785 | C         | -2.533235 | 5.430639  | -2.529060 |
| H         | 4.125812  | -0.445472 | -3.558543 | C         | -1.151746 | 5.488474  | -2.229026 |

|           |           |           |           |   |           |           |           |
|-----------|-----------|-----------|-----------|---|-----------|-----------|-----------|
| C         | 1.059711  | 5.463698  | 2.265119  | C | 1.263519  | 2.845385  | 1.098005  |
| C         | 2.438634  | 5.420499  | 2.578563  | C | 2.410993  | 4.852508  | 2.715623  |
| H         | -4.338521 | 4.299259  | -2.336243 | C | 0.485898  | 3.940308  | 1.564218  |
| H         | -2.992061 | 6.222051  | -3.111986 | C | 2.627001  | 2.764690  | 1.499001  |
| H         | -0.558210 | 6.319501  | -2.595398 | C | 3.179498  | 3.796894  | 2.302692  |
| H         | 0.508065  | 4.552208  | -1.273318 | C | 1.045744  | 4.915121  | 2.349564  |
| H         | -0.576460 | 4.522833  | 1.274855  | H | -0.564183 | 3.993629  | 1.299351  |
| H         | 0.450176  | 6.278828  | 2.640836  | H | 4.224309  | 3.723929  | 2.590761  |
| H         | 2.879847  | 6.207360  | 3.180919  | H | 0.433956  | 5.740071  | 2.699700  |
| H         | 4.261780  | 4.318437  | 2.383778  | H | 2.840544  | 5.634325  | 3.333069  |
| C         | -6.198805 | -2.327944 | -1.583575 | C | -3.375730 | 1.717562  | -1.059846 |
| F         | -7.255283 | -2.952704 | -1.045307 | H | -4.415558 | 1.686994  | -1.375134 |
| F         | -5.530217 | -3.233276 | -2.308820 | C | -2.858364 | 0.663751  | -0.349086 |
| F         | -6.662526 | -1.403448 | -2.437507 | C | 3.407924  | 1.645049  | 1.114128  |
| C         | -4.356606 | -2.288695 | 3.075620  | H | 4.447941  | 1.592839  | 1.425385  |
| F         | -4.842870 | -3.534997 | 3.133079  | C | 2.875484  | 0.611859  | 0.384240  |
| F         | -5.073921 | -1.541250 | 3.927910  | O | -0.802978 | -1.833137 | -1.286481 |
| F         | -3.101191 | -2.316510 | 3.544075  | H | -1.313514 | -2.638357 | -1.124233 |
| C         | 4.418266  | -2.244352 | -3.096847 | C | -3.680987 | -0.530697 | -0.001757 |
| F         | 4.090846  | -1.335124 | -4.023142 | C | -4.092439 | -0.728119 | 1.331168  |
| F         | 3.508537  | -3.225602 | -3.162015 | C | -4.055645 | -1.442778 | -1.008268 |
| F         | 5.598422  | -2.777121 | -3.443487 | C | -3.732153 | 0.170365  | 2.386858  |
| C         | 6.145988  | -2.308453 | 1.595907  | C | -4.910777 | -1.860728 | 1.659043  |
| F         | 7.195770  | -2.963693 | 1.085417  | C | -4.880604 | -2.569872 | -0.667684 |
| F         | 5.432672  | -3.193554 | 2.307938  | C | -3.623536 | -1.314105 | -2.371107 |
| F         | 6.611741  | -1.395724 | 2.460022  | C | -4.146597 | -0.048249 | 3.666884  |
| C         | 3.666570  | -0.550204 | -1.415206 | H | -3.119899 | 1.035203  | 2.154624  |
| H         | 3.036131  | -0.117090 | -2.183511 | C | -5.325927 | -2.052591 | 3.014632  |
| C         | 4.508725  | -0.581021 | 0.839036  | C | -5.288845 | -2.749465 | 0.652960  |
| H         | 4.519646  | -0.182380 | 1.848708  | C | -5.260421 | -3.492732 | -1.694328 |
| C         | 5.303472  | -2.210952 | -0.760299 | H | -2.967930 | -0.491970 | -2.634914 |
| H         | 5.940224  | -3.052104 | -1.010474 | C | -3.999101 | -2.222633 | -3.316003 |
| C         | -3.617917 | -0.629215 | 1.373280  | C | -4.955641 | -1.177351 | 3.989733  |
| H         | -2.953045 | -0.219844 | 2.126011  | H | -3.859049 | 0.642372  | 4.452796  |
| C         | -4.540872 | -0.609543 | -0.847446 | H | -5.943450 | -2.916115 | 3.245150  |
| H         | -4.585646 | -0.191744 | -1.848117 | H | -5.912458 | -3.604189 | 0.904993  |
| C         | -5.269206 | -2.282496 | 0.739158  | C | -4.838300 | -3.326227 | -2.977986 |
| H         | -5.881019 | -3.142523 | 0.985751  | H | -5.891326 | -4.333395 | -1.419492 |
| <b>A3</b> |           |           |           | H | -3.652545 | -2.110699 | -4.338147 |
| P         | -0.002556 | -1.340724 | -0.000743 | H | -5.273417 | -1.332313 | 5.015501  |
| O         | 0.549740  | -2.353574 | 0.896694  | H | -5.129264 | -4.033459 | -3.747674 |
| O         | -0.992577 | -0.324382 | 0.778289  | C | 3.685299  | -0.582788 | 0.010369  |
| O         | 0.994015  | -0.327960 | -0.760111 | C | 4.001423  | -1.545506 | 0.986436  |
| C         | -1.500102 | 0.744139  | 0.056038  | C | 4.144029  | -0.722560 | -1.313141 |
| C         | -0.684978 | 1.821447  | -0.215369 | C | 3.513225  | -1.471608 | 2.332067  |
| C         | 1.517289  | 0.717361  | -0.011082 | C | 4.830717  | -2.662746 | 0.628781  |
| C         | 0.718591  | 1.803683  | 0.277642  | C | 4.960989  | -1.849878 | -1.660785 |
| C         | -1.213480 | 2.886156  | -1.017152 | C | 3.834682  | 0.227734  | -2.339217 |
| C         | -2.328738 | 4.939249  | -2.599371 | C | 3.849042  | -2.418381 | 3.252335  |
| C         | -0.418842 | 3.976984  | -1.463249 | H | 2.851658  | -0.657126 | 2.605129  |
| C         | -2.577612 | 2.833366  | -1.421138 | C | 5.165051  | -3.630115 | 1.628866  |
| C         | -3.113802 | 3.888267  | -2.206011 | C | 5.290680  | -2.786315 | -0.680980 |
| C         | -0.963108 | 4.974094  | -2.231535 | C | 5.425886  | -1.983722 | -3.007034 |
| H         | 0.631488  | 4.009358  | -1.196141 | H | 3.223491  | 1.089059  | -2.089969 |
| H         | -4.159436 | 3.836837  | -2.495898 | C | 4.295076  | 0.063037  | -3.611905 |
| H         | -0.338440 | 5.795684  | -2.566420 | C | 4.695443  | -3.511540 | 2.901031  |
| H         | -2.745742 | 5.738693  | -3.202679 | H | 3.459367  | -2.350618 | 4.262643  |
|           |           |           |           | H | 5.799665  | -4.464540 | 1.343585  |

|   |          |           |           |
|---|----------|-----------|-----------|
| H | 5.916900 | -3.635201 | -0.946407 |
| C | 5.103787 | -1.060312 | -3.954962 |
| H | 6.042766 | -2.843490 | -3.253549 |
| H | 4.045653 | 0.792595  | -4.375566 |
| H | 4.951765 | -4.252394 | 3.651350  |
| H | 5.460192 | -1.172385 | -4.973725 |

**A4**

|   |           |           |           |
|---|-----------|-----------|-----------|
| H | 1.725016  | -2.754656 | 0.614332  |
| O | -0.521817 | -2.588102 | -1.046038 |
| P | 0.101133  | -1.588626 | -0.179993 |
| O | -0.819991 | -0.658119 | 0.758362  |
| O | 0.925993  | -0.490217 | -1.032156 |
| O | 1.097319  | -2.101005 | 0.954345  |
| C | -2.842183 | 2.459487  | -1.134745 |
| C | -3.530616 | 1.304824  | -0.689172 |
| C | -2.883630 | 0.261605  | -0.069967 |
| C | -1.484937 | 0.400430  | 0.145454  |
| C | -0.765583 | 1.523518  | -0.209112 |
| C | -1.441731 | 2.572619  | -0.912908 |
| H | -4.603895 | 1.240718  | -0.846852 |
| C | 2.671513  | 2.596442  | 1.146191  |
| C | 3.446027  | 1.502778  | 0.684512  |
| C | 2.886275  | 0.462247  | -0.016500 |
| C | 1.498836  | 0.549885  | -0.313553 |
| C | 0.689717  | 1.583227  | 0.100805  |
| C | 1.272174  | 2.631151  | 0.886959  |
| H | 4.508817  | 1.480697  | 0.911270  |
| C | 3.672130  | -0.746808 | -0.372999 |
| C | 4.329025  | -2.482788 | -1.941449 |
| C | 5.235017  | -2.478146 | 0.320993  |
| C | -3.623116 | -0.958764 | 0.340761  |
| C | -5.284418 | -2.656527 | -0.170844 |
| C | -4.194179 | -2.627689 | 2.007347  |
| C | -3.525305 | 3.500127  | -1.818703 |
| C | -0.762887 | 3.706643  | -1.435935 |
| C | 0.505845  | 3.684464  | 1.455126  |
| C | 3.265282  | 3.639020  | 1.905968  |
| C | -2.847933 | 4.593024  | -2.289893 |
| C | -1.448339 | 4.688117  | -2.104802 |
| C | 1.106934  | 4.669054  | 2.197070  |
| C | 2.504470  | 4.657082  | 2.416158  |
| H | -4.596833 | 3.403440  | -1.968937 |
| H | -3.377395 | 5.380410  | -2.816031 |
| H | -0.911498 | 5.543421  | -2.501805 |
| H | 0.311209  | 3.784386  | -1.309355 |
| H | -0.567318 | 3.699333  | 1.302586  |
| H | 0.503572  | 5.462663  | 2.625419  |
| H | 2.966299  | 5.446692  | 2.999510  |
| H | 4.336472  | 3.603751  | 2.083435  |
| C | -6.237638 | -3.291566 | -1.150939 |
| C | -4.014347 | -3.235006 | 3.375451  |
| C | 4.243129  | -3.092453 | -3.317533 |
| C | 6.132911  | -3.091872 | 1.365033  |
| C | 3.596669  | -1.332304 | -1.639001 |
| H | 2.955302  | -0.891844 | -2.396118 |
| C | 4.493391  | -1.331980 | 0.599423  |
| H | 4.524998  | -0.898348 | 1.595792  |

|   |           |           |           |
|---|-----------|-----------|-----------|
| C | 5.137184  | -3.043587 | -0.953336 |
| H | 5.700974  | -3.946842 | -1.177703 |
| C | -3.456478 | -1.516077 | 1.614612  |
| H | -2.749625 | -1.068535 | 2.306549  |
| C | -4.536462 | -1.536279 | -0.540383 |
| H | -4.648911 | -1.120905 | -1.538952 |
| C | -5.105646 | -3.184454 | 1.104457  |
| H | -5.685122 | -4.055327 | 1.405380  |
| H | -6.931175 | -3.968387 | -0.646946 |
| H | -5.691433 | -3.870194 | -1.902606 |
| H | -6.822660 | -2.535376 | -1.681340 |
| H | -3.534427 | -4.216134 | 3.305118  |
| H | -4.977333 | -3.376526 | 3.874366  |
| H | -3.390637 | -2.602332 | 4.010319  |
| H | 6.110126  | -4.183435 | 1.314913  |
| H | 7.171336  | -2.778623 | 1.216198  |
| H | 5.835958  | -2.788639 | 2.371471  |
| H | 3.202525  | -3.194543 | -3.636464 |
| H | 4.751783  | -2.462420 | -4.053824 |
| H | 4.708237  | -4.080162 | -3.343222 |

**B1**

|   |           |           |           |
|---|-----------|-----------|-----------|
| H | 1.461269  | -2.098062 | 0.650605  |
| P | 0.003730  | -0.774198 | -0.230769 |
| O | 0.737388  | -1.529251 | 0.960443  |
| O | -0.611171 | -1.565735 | -1.297441 |
| H | -1.252443 | 4.513999  | -2.756139 |
| H | -1.552397 | 5.184553  | -1.154695 |
| H | -3.832873 | 3.311992  | -2.386948 |
| C | -1.189940 | 4.296408  | -1.686600 |
| C | -3.253974 | 2.683679  | -1.716660 |
| H | 0.865211  | 4.778524  | -1.003227 |
| C | 0.233810  | 3.916676  | -1.237293 |
| C | -1.986876 | 3.070191  | -1.302545 |
| H | 0.726986  | 3.334591  | -2.022889 |
| C | -3.772661 | 1.471363  | -1.267315 |
| H | -4.769942 | 1.161918  | -1.565144 |
| H | -0.883705 | 4.720931  | 1.052249  |
| H | 1.528500  | 5.162014  | 1.244420  |
| C | -1.245900 | 2.265419  | -0.431592 |
| C | 0.015100  | 2.995074  | -0.004585 |
| C | -0.236916 | 3.864450  | 1.261455  |
| C | 1.170739  | 4.254969  | 1.746835  |
| C | -3.028646 | 0.607511  | -0.456461 |
| C | -1.752407 | 1.027783  | -0.063808 |
| C | 1.288715  | 2.281347  | 0.409300  |
| C | 1.991779  | 3.053123  | 1.340119  |
| H | -0.728731 | 3.242380  | 2.016872  |
| O | 1.086932  | 0.255522  | -0.855437 |
| H | 1.213190  | 4.443693  | 2.822783  |
| C | 1.819866  | 1.067216  | 0.002397  |
| C | -3.874276 | -1.705311 | -0.958553 |
| C | -3.588155 | -0.702757 | -0.014818 |
| C | 3.244873  | 2.659108  | 1.788889  |
| O | -0.943830 | 0.159695  | 0.677205  |
| C | 3.910869  | -0.972367 | -1.294641 |
| C | 3.072729  | 0.628818  | 0.454186  |
| H | 3.793497  | 3.266116  | 2.502661  |



|   |           |           |           |
|---|-----------|-----------|-----------|
| C | 3.780613  | 1.458433  | 1.329298  |
| C | -4.427330 | -2.905272 | -0.514478 |
| H | 4.613259  | -2.439722 | -2.688198 |
| C | -3.861975 | -0.912782 | 1.347383  |
| H | -4.641358 | -3.684418 | -1.242992 |
| C | 4.374393  | -2.239417 | -1.645980 |
| C | 3.605025  | -0.705839 | 0.053229  |
| H | 4.758441  | 1.132348  | 1.671127  |
| C | -4.705216 | -3.137053 | 0.831254  |
| C | -4.420233 | -2.126765 | 1.746286  |
| C | 4.534200  | -3.254410 | -0.704139 |
| C | 3.790452  | -1.706064 | 1.028718  |
| H | -4.639915 | -2.284119 | 2.800163  |
| C | 4.240311  | -2.966929 | 0.627528  |
| H | 4.369395  | -3.741599 | 1.380310  |
| C | 4.992448  | -4.627669 | -1.121829 |
| H | 5.772466  | -4.567177 | -1.885016 |
| H | 5.386788  | -5.189846 | -0.272482 |
| H | 4.162579  | -5.201989 | -1.546073 |
| C | 3.499460  | -1.458310 | 2.491414  |
| H | 3.375660  | -2.406657 | 3.019473  |
| H | 4.320631  | -0.918455 | 2.973197  |
| H | 2.592723  | -0.864184 | 2.625199  |
| C | 3.755093  | 0.086880  | -2.355846 |
| H | 2.701594  | 0.214860  | -2.621532 |
| H | 4.127421  | 1.053807  | -2.006764 |
| H | 4.304291  | -0.190821 | -3.257805 |
| C | -5.272624 | -4.457734 | 1.284733  |
| H | -5.808102 | -4.355154 | 2.231687  |
| H | -5.963118 | -4.867601 | 0.543174  |
| H | -4.475330 | -5.193639 | 1.432868  |
| C | -3.581572 | -1.515729 | -2.426188 |
| H | -3.668942 | -2.468255 | -2.953318 |
| H | -4.278927 | -0.812044 | -2.891773 |
| H | -2.566899 | -1.137699 | -2.567122 |
| C | -3.576128 | 0.151452  | 2.377739  |
| H | -2.499796 | 0.241905  | 2.555704  |
| H | -3.938908 | 1.130562  | 2.051412  |
| H | -4.056908 | -0.094595 | 3.327008  |

**B2**

|   |           |           |           |
|---|-----------|-----------|-----------|
| H | 0.939770  | -1.413031 | 0.935903  |
| P | -0.061793 | 0.172240  | -0.095214 |
| O | 0.730454  | -0.486661 | 1.118122  |
| O | -0.703446 | -0.727930 | -1.053107 |
| H | -1.284427 | 5.410946  | -2.838254 |
| H | -1.603047 | 6.107653  | -1.250883 |
| H | -3.826185 | 4.154012  | -2.527634 |
| C | -1.229247 | 5.213725  | -1.764696 |
| C | -3.261175 | 3.562018  | -1.814457 |
| H | 0.819894  | 5.719925  | -1.082174 |
| C | 0.192120  | 4.850364  | -1.295377 |
| C | -2.020864 | 3.990916  | -1.362732 |
| H | 0.690162  | 4.248757  | -2.062608 |
| C | -3.766574 | 2.348219  | -1.356408 |
| H | -4.739199 | 2.003636  | -1.694160 |
| H | -0.892676 | 5.728252  | 0.983820  |
| H | 1.528559  | 6.128247  | 1.152609  |

|   |           |           |           |
|---|-----------|-----------|-----------|
| C | -1.294617 | 3.229026  | -0.441948 |
| C | -0.030982 | 3.963451  | -0.037041 |
| C | -0.261193 | 4.864715  | 1.209711  |
| C | 1.156393  | 5.240399  | 1.677999  |
| C | -3.039041 | 1.536875  | -0.479326 |
| C | -1.793336 | 2.002347  | -0.036044 |
| C | 1.235740  | 3.238421  | 0.379625  |
| C | 1.954186  | 4.016131  | 1.294320  |
| H | -0.758806 | 4.270520  | 1.982994  |
| O | 0.980454  | 1.175469  | -0.820658 |
| H | 1.208792  | 5.452617  | 2.748865  |
| C | 1.745867  | 2.010577  | -0.011200 |
| C | -4.126677 | -0.639379 | -1.026482 |
| C | -3.559824 | 0.208948  | -0.071434 |
| C | 3.197927  | 3.606427  | 1.753738  |
| O | -0.993810 | 1.176414  | 0.758560  |
| C | 3.479540  | -0.224622 | -1.262487 |
| C | 2.996986  | 1.565975  | 0.441341  |
| H | 3.756378  | 4.214325  | 2.458578  |
| C | 3.715590  | 2.392595  | 1.311254  |
| C | -4.644306 | -1.872401 | -0.651883 |
| C | -3.513798 | -0.211954 | 1.259008  |
| C | 4.005048  | -1.468862 | -1.591254 |
| C | 3.533628  | 0.236864  | 0.057895  |
| H | 4.692648  | 2.063671  | 1.651981  |
| C | -4.601581 | -2.293132 | 0.673135  |
| C | -4.028859 | -1.453174 | 1.619245  |
| C | 4.595342  | -2.278252 | -0.626055 |
| C | 4.118943  | -0.579948 | 1.029197  |
| C | 4.646438  | -1.820520 | 0.684724  |
| C | -5.207155 | -2.793444 | -1.698598 |
| F | -6.196383 | -3.551505 | -1.202714 |
| F | -4.274980 | -3.627681 | -2.176366 |
| F | -5.700764 | -2.111555 | -2.742068 |
| C | -3.919956 | -1.891698 | 3.052632  |
| F | -4.165672 | -0.878316 | 3.895840  |
| F | -2.687695 | -2.341303 | 3.334236  |
| F | -4.778245 | -2.879007 | 3.340208  |
| H | -4.146927 | -0.341319 | -2.069536 |
| H | -5.015688 | -3.252141 | 0.962786  |
| H | -3.083944 | 0.432512  | 2.018610  |
| H | 3.030489  | 0.389756  | -2.034775 |
| H | 4.139340  | -0.256548 | 2.065312  |
| H | 5.004667  | -3.246577 | -0.890977 |
| C | 3.888346  | -1.974432 | -3.003994 |
| F | 2.755022  | -2.664489 | -3.182500 |
| F | 4.903174  | -2.793455 | -3.314665 |
| F | 3.887393  | -0.969512 | -3.888921 |
| C | 5.322668  | -2.648965 | 1.742054  |
| F | 6.603976  | -2.288051 | 1.901014  |
| F | 5.312413  | -3.951636 | 1.432435  |
| F | 4.724474  | -2.505757 | 2.933239  |

**B3**

|   |           |           |           |
|---|-----------|-----------|-----------|
| H | 1.256358  | -1.857564 | 0.988603  |
| P | -0.019320 | -0.490033 | -0.103528 |
| O | 0.640814  | -1.137334 | 1.189630  |
| O | -0.566666 | -1.363871 | -1.140854 |

|   |           |           |           |           |           |           |           |
|---|-----------|-----------|-----------|-----------|-----------|-----------|-----------|
| H | -1.019689 | 4.755407  | -2.894302 | C         | 4.660500  | -1.814220 | -1.469755 |
| H | -1.453588 | 5.452761  | -1.335198 | C         | 4.430950  | -2.642485 | 0.805171  |
| H | -3.610188 | 3.537286  | -2.748256 | C         | 3.344732  | -1.296005 | 2.554413  |
| C | -1.048538 | 4.555977  | -1.819848 | C         | 4.319289  | 0.221778  | -3.374137 |
| C | -3.097924 | 2.933018  | -2.005701 | H         | 3.450167  | 1.385285  | -1.825018 |
| H | 0.944301  | 5.048150  | -0.976956 | C         | 5.085664  | -1.999760 | -2.823415 |
| C | 0.330815  | 4.183049  | -1.244192 | C         | 4.844680  | -2.813069 | -0.514923 |
| C | -1.877681 | 3.337903  | -1.481868 | C         | 4.614561  | -3.675820 | 1.778649  |
| H | 0.884305  | 3.583110  | -1.974501 | H         | 2.823033  | -0.394239 | 2.854466  |
| C | -3.655745 | 1.732149  | -1.572839 | C         | 3.528974  | -2.310489 | 3.447228  |
| H | -4.613115 | 1.401420  | -1.964064 | C         | 4.919007  | -1.016292 | -3.749458 |
| H | -0.939542 | 5.041004  | 0.948508  | H         | 4.198693  | 1.001354  | -4.119199 |
| H | 1.456685  | 5.455715  | 1.312655  | H         | 5.545435  | -2.946832 | -3.091208 |
| C | -1.220447 | 2.558865  | -0.525350 | H         | 5.318782  | -3.747298 | -0.806946 |
| C | 0.008211  | 3.286988  | -0.014612 | C         | 4.183727  | -3.517144 | 3.060392  |
| C | -0.322194 | 4.178992  | 1.216172  | H         | 5.102255  | -4.594164 | 1.463988  |
| C | 1.052766  | 4.558217  | 1.796879  | H         | 3.166426  | -2.203757 | 4.464334  |
| C | -2.993480 | 0.900442  | -0.662407 | H         | 5.243093  | -1.166013 | -4.774019 |
| C | -1.758387 | 1.332655  | -0.165375 | H         | 4.324056  | -4.308515 | 3.789163  |
| C | 1.239925  | 2.564879  | 0.497994  |           |           |           |           |
| C | 1.888125  | 3.343824  | 1.461848  | <b>B4</b> |           |           |           |
| H | -0.875097 | 3.574961  | 1.943534  | H         | 1.558789  | -1.958674 | 0.620375  |
| O | 1.093100  | 0.510113  | -0.730809 | P         | 0.002449  | -0.699131 | -0.190388 |
| H | 1.020350  | 4.758126  | 2.871137  | O         | 0.845750  | -1.397501 | 0.963269  |
| C | 1.784731  | 1.341647  | 0.139069  | O         | -0.680723 | -1.534522 | -1.178102 |
| C | 3.107009  | 2.946292  | 1.994159  | H         | -1.410413 | 4.595633  | -2.667116 |
| O | -1.027978 | 0.496798  | 0.678272  | H         | -1.619372 | 5.253943  | -1.045669 |
| C | 3.016915  | 0.915242  | 0.653074  | H         | -3.931298 | 3.343350  | -2.203995 |
| H | 3.611585  | 3.554483  | 2.738665  | C         | -1.283321 | 4.371885  | -1.604597 |
| C | 3.671994  | 1.746164  | 1.568104  | C         | -3.319734 | 2.728035  | -1.550917 |
| H | 4.627625  | 1.419113  | 1.967166  | H         | 0.807763  | 4.862581  | -1.048261 |
| C | -3.606553 | -0.389579 | -0.234993 | C         | 0.165851  | 3.998406  | -1.242014 |
| C | -4.032594 | -0.549579 | 1.099902  | C         | -2.046675 | 3.138075  | -1.180920 |
| C | -3.813948 | -1.415346 | -1.178422 | H         | 0.610978  | 3.416781  | -2.055865 |
| C | -3.856949 | 0.463644  | 2.098171  | C         | -3.800786 | 1.507999  | -1.083893 |
| C | -4.692464 | -1.763915 | 1.489454  | H         | -4.800124 | 1.178697  | -1.351126 |
| C | -4.499509 | -2.612784 | -0.781189 | H         | -0.782039 | 4.809490  | 1.120493  |
| C | -3.344928 | -1.328084 | -2.530124 | H         | 1.642717  | 5.226454  | 1.149712  |
| C | -4.281070 | 0.273950  | 3.379807  | C         | -1.259479 | 2.346237  | -0.338828 |
| H | -3.381400 | 1.397985  | 1.820391  | C         | 0.027392  | 3.077660  | 0.003098  |
| C | -5.120918 | -1.923922 | 2.845235  | C         | -0.130814 | 3.946408  | 1.284388  |
| C | -4.919328 | -2.758791 | 0.539536  | C         | 1.310007  | 4.323092  | 1.675599  |
| C | -4.735183 | -3.638302 | -1.751371 | C         | -3.018957 | 0.664490  | -0.286240 |
| H | -2.761232 | -0.463835 | -2.824364 | C         | -1.736322 | 1.107528  | 0.065583  |
| C | -3.584540 | -2.329361 | -3.422535 | C         | 1.323669  | 2.356950  | 0.323493  |
| C | -4.920028 | -0.940840 | 3.765472  | C         | 2.090000  | 3.113297  | 1.215697  |
| H | -4.134858 | 1.056039  | 4.117921  | H         | -0.575330 | 3.327643  | 2.070662  |
| H | -5.613229 | -2.852734 | 3.120161  | O         | 1.003500  | 0.343771  | -0.927483 |
| H | -5.433760 | -3.670057 | 0.836695  | H         | 1.425131  | 4.511540  | 2.746260  |
| C | -4.301921 | -3.499418 | -3.034160 | C         | 1.812775  | 1.142429  | -0.129858 |
| H | -5.265433 | -4.532067 | -1.434283 | C         | -4.186464 | -1.480460 | -0.777805 |
| H | -3.209373 | -2.247893 | -4.437426 | C         | -3.535816 | -0.659916 | 0.141807  |
| H | -5.248268 | -1.072535 | 4.791362  | C         | 3.356834  | 2.692243  | 1.595652  |
| H | -4.483824 | -4.283089 | -3.762567 | O         | -0.881425 | 0.252620  | 0.766365  |
| C | 3.618706  | -0.386368 | 0.242307  | C         | 3.409486  | -1.147146 | -1.451888 |
| C | 4.042126  | -0.574849 | -1.090313 | C         | 3.080032  | 0.676837  | 0.254386  |
| C | 3.799925  | -1.411331 | 1.196750  | H         | 3.953972  | 3.283309  | 2.283314  |
| C | 3.898512  | 0.435951  | -2.095704 | C         | 3.844165  | 1.484145  | 1.103855  |

|   |           |           |           |
|---|-----------|-----------|-----------|
| C | -4.715696 | -2.713995 | -0.393296 |
| C | -3.410584 | -1.087191 | 1.469102  |
| C | 3.818089  | -2.438029 | -1.798903 |
| C | 3.559531  | -0.671158 | -0.146957 |
| H | 4.831636  | 1.138389  | 1.394400  |
| C | -4.586134 | -3.110292 | 0.935048  |
| C | -3.932145 | -2.310565 | 1.877146  |
| C | 4.386967  | -3.248648 | -0.818423 |
| C | 4.134386  | -1.511272 | 0.818582  |
| C | 4.557390  | -2.798995 | 0.494681  |
| C | -5.383949 | -3.603664 | -1.410431 |
| C | -3.788046 | -2.778844 | 3.303056  |
| H | -4.255155 | -1.165856 | -1.816243 |
| H | -4.998633 | -4.068058 | 1.247118  |
| H | -2.905073 | -0.450204 | 2.189163  |
| H | 2.955249  | -0.509653 | -2.204140 |
| H | 4.221498  | -1.158212 | 1.843127  |
| H | 4.698886  | -4.258071 | -1.078112 |
| C | 3.620894  | -2.934928 | -3.208015 |
| C | 5.194798  | -3.688612 | 1.531289  |
| H | -3.453399 | -1.968169 | 3.953792  |
| H | -4.736323 | -3.160595 | 3.691811  |
| H | -5.930284 | -4.417047 | -0.927587 |
| H | -6.087788 | -3.039411 | -2.028519 |
| H | -4.642495 | -4.048349 | -2.081580 |
| H | -3.054691 | -3.588399 | 3.374385  |
| H | 2.557531  | -2.956658 | -3.463800 |
| H | 4.117634  | -2.277293 | -3.927048 |
| H | 4.022922  | -3.942273 | -3.333793 |
| H | 4.863180  | -4.724221 | 1.421589  |
| H | 6.284863  | -3.680620 | 1.430315  |
| H | 4.952058  | -3.356043 | 2.542881  |

**TS-[4+2]-A1-R-1**

|   |           |           |           |
|---|-----------|-----------|-----------|
| H | -0.122324 | 2.535997  | -1.027990 |
| O | -0.531983 | -0.031843 | 0.753699  |
| P | 0.576757  | 0.287200  | -0.206752 |
| O | 1.028441  | -1.032573 | -1.034960 |
| O | 1.894997  | 0.590987  | 0.692005  |
| O | 0.384831  | 1.356358  | -1.260585 |
| C | 2.773851  | -4.072347 | 1.214195  |
| C | 1.425899  | -4.163123 | 0.787353  |
| C | 0.817540  | -3.161350 | 0.069674  |
| C | 1.614178  | -2.040298 | -0.283975 |
| C | 2.938372  | -1.899413 | 0.077865  |
| C | 3.539420  | -2.918642 | 0.885007  |
| H | 0.848868  | -5.044968 | 1.055295  |
| C | 5.537966  | 0.566381  | -1.324668 |
| C | 4.946770  | 1.781450  | -0.895342 |
| C | 3.738340  | 1.808784  | -0.243470 |
| C | 3.112347  | 0.564445  | 0.029604  |
| C | 3.661705  | -0.655989 | -0.306584 |
| C | 4.887149  | -0.668648 | -1.047601 |
| H | 5.458636  | 2.718030  | -1.103170 |
| C | 3.116296  | 3.097416  | 0.181070  |
| C | 3.081847  | 3.434952  | 1.546203  |
| C | 2.609043  | 3.982770  | -0.781616 |
| C | 2.561502  | 4.670554  | 1.923069  |

|   |           |           |           |
|---|-----------|-----------|-----------|
| C | 2.096714  | 5.212026  | -0.360823 |
| C | 2.075716  | 5.578949  | 0.981164  |
| H | 2.544656  | 4.935457  | 2.978431  |
| H | 1.697292  | 5.895205  | -1.107873 |
| C | -0.623100 | -3.274491 | -0.307343 |
| C | -1.607799 | -3.277148 | 0.699525  |
| C | -0.986651 | -3.463218 | -1.650517 |
| C | -2.933129 | -3.521900 | 0.342779  |
| C | -2.330647 | -3.672365 | -1.965142 |
| C | -3.317064 | -3.720076 | -0.982759 |
| H | -3.687955 | -3.539720 | 1.126089  |
| H | -2.609440 | -3.819821 | -3.006846 |
| C | 0.051959  | -3.465028 | -2.743102 |
| H | 0.455444  | -2.460115 | -2.897867 |
| H | 0.891232  | -4.118957 | -2.487538 |
| H | -0.378221 | -3.811545 | -3.685110 |
| C | -1.271827 | -2.970948 | 2.139790  |
| H | -0.731273 | -3.791006 | 2.622715  |
| H | -0.645941 | -2.075572 | 2.200995  |
| H | -2.188845 | -2.785704 | 2.707596  |
| C | -4.760237 | -3.980197 | -1.332635 |
| H | -5.420623 | -3.261203 | -0.836944 |
| H | -4.929429 | -3.893055 | -2.408503 |
| H | -5.065723 | -4.984061 | -1.019924 |
| C | 3.607629  | 2.482044  | 2.589092  |
| H | 2.969792  | 1.595490  | 2.659882  |
| H | 4.616411  | 2.140087  | 2.338800  |
| H | 3.640038  | 2.960383  | 3.570248  |
| C | 2.586361  | 3.621973  | -2.246489 |
| H | 1.963546  | 4.327777  | -2.800746 |
| H | 3.589768  | 3.641979  | -2.683448 |
| H | 2.181883  | 2.616706  | -2.391621 |
| C | 1.563636  | 6.931203  | 1.411544  |
| H | 0.965751  | 7.398611  | 0.623961  |
| H | 0.948484  | 6.857764  | 2.313549  |
| H | 2.392501  | 7.609181  | 1.639578  |
| C | 3.362587  | -5.100263 | 1.997954  |
| C | 4.857980  | -2.812479 | 1.406956  |
| C | 5.464722  | -1.865868 | -1.551931 |
| C | 6.760491  | 0.562196  | -2.047473 |
| C | 4.645182  | -4.981752 | 2.462540  |
| C | 5.393906  | -3.816645 | 2.171534  |
| C | 6.639885  | -1.835543 | -2.257670 |
| C | 7.304461  | -0.610017 | -2.500864 |
| H | 2.766758  | -5.978776 | 2.229410  |
| H | 5.085267  | -5.770212 | 3.064114  |
| H | 6.400802  | -3.714501 | 2.563049  |
| H | 5.437943  | -1.920113 | 1.200514  |
| H | 4.957580  | -2.808731 | -1.379115 |
| H | 7.061967  | -2.759515 | -2.639256 |
| H | 8.236327  | -0.602455 | -3.056544 |
| H | 7.249394  | 1.512808  | -2.241554 |
| N | -3.845666 | 2.278507  | -0.276221 |
| C | -2.577848 | 2.332472  | -0.716089 |
| N | -4.800962 | 2.763896  | 0.157607  |
| H | -2.157411 | 1.448526  | -1.169185 |
| C | -1.796891 | 3.470105  | -0.508355 |
| O | -0.552842 | 3.528884  | -0.798287 |

|                        |           |           |           |   |           |           |           |
|------------------------|-----------|-----------|-----------|---|-----------|-----------|-----------|
| O                      | -2.361879 | 4.534343  | 0.032684  | H | -4.375722 | -1.464479 | 2.438567  |
| C                      | -1.484771 | 5.620817  | 0.356170  | H | -5.397865 | 3.370058  | 2.931788  |
| H                      | -2.110333 | 6.354433  | 0.860241  | H | -5.675685 | -0.671346 | 4.357654  |
| H                      | -0.677351 | 5.274094  | 1.004147  | H | -6.224094 | 1.746644  | 4.604073  |
| H                      | -1.050982 | 6.040571  | -0.553908 | C | -2.258542 | -4.034665 | -0.191923 |
| C                      | -4.855735 | -0.214060 | -0.956069 | H | -1.955035 | -5.074379 | -0.287944 |
| C                      | -6.091700 | 0.474560  | -0.650205 | C | -1.293609 | -3.059235 | -0.131671 |
| C                      | -7.064955 | 0.545891  | -1.711386 | C | -3.894400 | 2.819896  | 0.785349  |
| C                      | -6.851939 | -0.002021 | -2.937052 | H | -4.094869 | 3.877758  | 0.936465  |
| C                      | -5.616482 | -0.653162 | -3.233574 | C | -3.106655 | 2.432640  | -0.270000 |
| C                      | -4.647790 | -0.729473 | -2.281963 | O | -0.177060 | -0.567994 | -2.418567 |
| H                      | -7.997695 | 1.059083  | -1.496794 | H | 0.849105  | -0.861667 | -2.673052 |
| H                      | -7.622193 | 0.060228  | -3.699425 | C | 0.158127  | -3.398921 | -0.190871 |
| H                      | -5.456193 | -1.088844 | -4.214020 | C | 0.950886  | -3.273229 | 0.963714  |
| H                      | -3.705698 | -1.229845 | -2.480744 | C | 0.711622  | -3.907141 | -1.375885 |
| C                      | -3.770698 | -0.322590 | -0.053815 | C | 2.291788  | -3.648648 | 0.913676  |
| C                      | -6.297731 | 1.263552  | 0.478252  | C | 2.044918  | -4.319005 | -1.367191 |
| H                      | -7.207351 | 1.853459  | 0.523608  | C | 2.856692  | -4.185550 | -0.243090 |
| H                      | -5.806350 | 1.094813  | 1.423503  | C | -2.472538 | 3.423844  | -1.185299 |
| O                      | -2.591083 | -0.557229 | -0.557274 | C | -1.402132 | 4.204607  | -0.724144 |
| H                      | -1.798012 | -0.490864 | 0.098560  | C | -2.947266 | 3.567121  | -2.499365 |
| C                      | -3.906828 | -0.371234 | 1.425644  | C | -0.827398 | 5.133047  | -1.593242 |
| C                      | -4.877267 | -1.219529 | 1.975677  | C | -2.350197 | 4.510162  | -3.331678 |
| C                      | -3.040671 | 0.329551  | 2.267570  | C | -1.289723 | 5.304502  | -2.895144 |
| C                      | -4.974116 | -1.369469 | 3.352083  | N | 3.805682  | -0.656218 | -0.051303 |
| H                      | -5.551636 | -1.753028 | 1.311718  | C | 2.883783  | -0.554473 | -1.008897 |
| C                      | -3.152866 | 0.186460  | 3.648531  | N | 4.678465  | -1.256283 | 0.434380  |
| H                      | -2.277888 | 0.973949  | 1.844182  | H | 2.217651  | 0.291124  | -0.988699 |
| C                      | -4.111330 | -0.662982 | 4.191517  | C | 2.917065  | -1.372401 | -2.164068 |
| H                      | -5.721087 | -2.035058 | 3.771794  | O | 2.025806  | -1.355441 | -3.044477 |
| H                      | -2.481148 | 0.736806  | 4.298480  | O | 4.000071  | -2.131953 | -2.316546 |
| H                      | -4.188356 | -0.777697 | 5.267919  | C | 4.102865  | -2.857327 | -3.540352 |
| <b>TS-[4+2]-A1-R-2</b> |           |           |           | H | 4.856373  | -3.624764 | -3.366317 |
| P                      | -0.576634 | 0.258936  | -1.190311 | H | 3.145303  | -3.303216 | -3.808359 |
| O                      | 0.257212  | 1.402833  | -0.748323 | H | 4.422498  | -2.186236 | -4.341188 |
| O                      | -0.757185 | -0.732538 | 0.089240  | C | 4.735590  | 1.819745  | 0.903619  |
| O                      | -2.107186 | 0.644248  | -1.524412 | C | 5.646583  | 0.933200  | 1.590274  |
| C                      | -1.731208 | -1.717316 | 0.018405  | C | 7.053340  | 1.173546  | 1.409204  |
| C                      | -3.055865 | -1.354447 | 0.145864  | C | 7.520063  | 2.156876  | 0.593938  |
| C                      | -2.882391 | 1.041848  | -0.442280 | C | 6.611712  | 2.977256  | -0.139936 |
| C                      | -3.390409 | 0.073499  | 0.396932  | C | 5.270271  | 2.793650  | -0.006344 |
| C                      | -4.054378 | -2.371662 | 0.004848  | H | 7.744739  | 0.526016  | 1.940045  |
| C                      | -5.959074 | -4.432190 | -0.277205 | H | 8.588962  | 2.313057  | 0.488164  |
| C                      | -5.445353 | -2.080189 | -0.020300 | H | 6.993801  | 3.753490  | -0.793995 |
| C                      | -3.641665 | -3.724551 | -0.150710 | H | 4.568683  | 3.416577  | -0.548233 |
| C                      | -4.624789 | -4.741433 | -0.277615 | C | 3.333355  | 1.713533  | 0.999204  |
| C                      | -6.369998 | -3.083404 | -0.157755 | C | 5.250825  | -0.273005 | 2.167357  |
| H                      | -5.769216 | -1.048285 | 0.060236  | H | 6.022221  | -0.926365 | 2.561318  |
| H                      | -4.293359 | -5.770388 | -0.385710 | H | 4.254851  | -0.441111 | 2.551589  |
| H                      | -7.427300 | -2.840601 | -0.181766 | O | 2.637898  | 2.251822  | 0.011839  |
| H                      | -6.702660 | -5.215543 | -0.380252 | H | 1.667110  | 2.077084  | 0.030275  |
| C                      | -4.151070 | 0.494799  | 1.537160  | C | 2.588996  | 1.341636  | 2.228876  |
| C                      | -5.642921 | 1.409510  | 3.752145  | C | 3.070017  | 1.794796  | 3.466230  |
| C                      | -4.610952 | -0.410415 | 2.532837  | C | 1.347197  | 0.704659  | 2.163826  |
| C                      | -4.423669 | 1.881660  | 1.707600  | C | 2.316532  | 1.611719  | 4.616835  |
| C                      | -5.189384 | 2.309271  | 2.824552  | H | 4.030318  | 2.298395  | 3.511218  |
| C                      | -5.336739 | 0.035845  | 3.607609  | C | 0.587686  | 0.542595  | 3.319900  |
|                        |           |           |           | H | 0.968107  | 0.335196  | 1.217607  |

|                        |           |           |           |   |           |           |           |
|------------------------|-----------|-----------|-----------|---|-----------|-----------|-----------|
| C                      | 1.068511  | 0.992421  | 4.545067  | H | 5.450225  | -1.915875 | 1.253146  |
| H                      | 2.693190  | 1.971073  | 5.568762  | H | 2.881240  | -6.033105 | 2.307763  |
| H                      | -0.387912 | 0.071788  | 3.253131  | H | 6.474917  | -3.697983 | 2.585001  |
| H                      | 0.471135  | 0.868220  | 5.442388  | H | 5.212134  | -5.784043 | 3.096616  |
| H                      | 2.906221  | -3.539009 | 1.804911  | C | 4.935282  | 1.712111  | -0.896501 |
| H                      | 2.463772  | -4.753483 | -2.272208 | H | 5.451997  | 2.641928  | -1.121779 |
| H                      | -2.718583 | 4.624323  | -4.349083 | C | 3.734140  | 1.758377  | -0.232599 |
| H                      | 0.010815  | 5.731528  | -1.243164 | C | 1.474502  | -4.230686 | 0.911523  |
| C                      | -4.079904 | 2.710416  | -3.004529 | H | 0.919004  | -5.123950 | 1.187063  |
| H                      | -3.761859 | 1.667187  | -3.099593 | C | 0.830347  | -3.230483 | 0.223937  |
| H                      | -4.931544 | 2.732608  | -2.317897 | O | 0.435834  | 1.260782  | -1.292776 |
| H                      | -4.418783 | 3.053174  | -3.984358 | H | -0.008762 | 2.462676  | -1.263585 |
| C                      | -0.674561 | 6.332226  | -3.810167 | C | 3.135669  | 3.062004  | 0.175932  |
| H                      | -0.572439 | 5.944457  | -4.827119 | C | 3.107539  | 3.419156  | 1.537680  |
| H                      | -1.297215 | 7.231531  | -3.863249 | C | 2.660906  | 3.948649  | -0.800004 |
| H                      | 0.314873  | 6.633241  | -3.458560 | C | 2.621390  | 4.672581  | 1.895759  |
| C                      | -0.858209 | 4.047915  | 0.674997  | C | 2.186313  | 5.199804  | -0.397004 |
| H                      | 0.125901  | 4.516779  | 0.754499  | C | 2.163856  | 5.582263  | 0.939843  |
| H                      | -1.512854 | 4.516745  | 1.417302  | C | -0.625455 | -3.338667 | -0.084290 |
| H                      | -0.758140 | 2.992606  | 0.941907  | C | -1.551621 | -3.333362 | 0.973225  |
| C                      | 4.309775  | -4.577070 | -0.286604 | C | -1.062416 | -3.513548 | -1.408511 |
| H                      | 4.492340  | -5.326904 | -1.061536 | C | -2.903572 | -3.536516 | 0.688648  |
| H                      | 4.928496  | -3.700208 | -0.504441 | C | -2.420826 | -3.706751 | -1.648475 |
| H                      | 4.639047  | -4.987337 | 0.671555  | C | -3.354220 | -3.741711 | -0.613576 |
| C                      | -0.097200 | -3.999446 | -2.646364 | N | -3.657534 | 2.488943  | -0.201698 |
| H                      | 0.554766  | -4.210681 | -3.497124 | C | -2.442063 | 2.381349  | -0.750562 |
| H                      | -0.852789 | -4.789456 | -2.594266 | N | -4.542885 | 3.089306  | 0.227859  |
| H                      | -0.618076 | -3.057818 | -2.840941 | H | -2.057540 | 1.402905  | -0.984181 |
| C                      | 0.347350  | -2.799198 | 2.259835  | C | -1.649680 | 3.525758  | -0.887910 |
| H                      | -0.162875 | -1.842932 | 2.131588  | O | -0.428470 | 3.500341  | -1.253723 |
| H                      | -0.392923 | -3.517938 | 2.627767  | O | -2.201428 | 4.692338  | -0.607126 |
| H                      | 1.115473  | -2.671962 | 3.025982  | C | -1.332441 | 5.830782  | -0.617245 |
| <b>TS-[4+2]-A1-S-1</b> |           |           |           | H | -1.948415 | 6.664114  | -0.286060 |
| P                      | 0.564041  | 0.264623  | -0.158542 | H | -0.491223 | 5.666763  | 0.058577  |
| O                      | -0.576424 | 0.066645  | 0.795224  | H | -0.953073 | 6.007516  | -1.625808 |
| O                      | 1.884654  | 0.572080  | 0.734951  | C | -4.169650 | 0.119272  | 1.313659  |
| O                      | 0.980111  | -1.114670 | -0.904735 | C | -5.305589 | 0.937153  | 1.702221  |
| C                      | 3.099638  | 0.524190  | 0.066504  | C | -5.480936 | 1.174637  | 3.114817  |
| C                      | 3.641260  | -0.704454 | -0.251610 | C | -4.608321 | 0.711587  | 4.047085  |
| C                      | 1.598344  | -2.096310 | -0.149593 | C | -3.454947 | -0.030065 | 3.649788  |
| C                      | 2.931172  | -1.940836 | 0.172617  | C | -3.241038 | -0.290604 | 2.332754  |
| C                      | 4.855432  | -0.737438 | -1.012307 | H | -6.343936 | 1.761285  | 3.415523  |
| C                      | 7.250525  | -0.717635 | -2.504638 | H | -4.782858 | 0.911285  | 5.099765  |
| C                      | 5.415304  | -1.945562 | -1.510879 | H | -2.758638 | -0.397937 | 4.395615  |
| C                      | 5.511505  | 0.487539  | -1.317367 | H | -2.377608 | -0.873823 | 2.038861  |
| C                      | 6.722917  | 0.464611  | -2.058257 | C | -3.878093 | -0.289420 | -0.009954 |
| C                      | 6.579131  | -1.933942 | -2.235801 | C | -6.075780 | 1.683109  | 0.821618  |
| H                      | 4.903697  | -2.882216 | -1.319748 | H | -6.843603 | 2.331948  | 1.228953  |
| H                      | 7.215799  | 1.408871  | -2.272232 | H | -6.156300 | 1.460113  | -0.231834 |
| H                      | 6.986630  | -2.866282 | -2.612869 | O | -2.669256 | -0.612381 | -0.386477 |
| H                      | 8.173692  | -0.725135 | -3.074663 | H | -1.875416 | -0.338543 | 0.217515  |
| C                      | 3.565748  | -2.949837 | 0.967927  | C | -4.874216 | -0.589338 | -1.068585 |
| C                      | 4.744284  | -5.000827 | 2.509329  | C | -6.174588 | -1.003140 | -0.752525 |
| C                      | 4.892210  | -2.820904 | 1.464451  | C | -4.462474 | -0.585680 | -2.405294 |
| C                      | 2.830472  | -4.120188 | 1.305878  | C | -7.058243 | -1.365135 | -1.758974 |
| C                      | 3.455198  | -5.141820 | 2.069884  | H | -6.484110 | -1.040080 | 0.287024  |
| C                      | 5.463098  | -3.818614 | 2.211894  | C | -5.350827 | -0.949380 | -3.412923 |
|                        |           |           |           | H | -3.442020 | -0.304403 | -2.641346 |

|                        |           |           |           |   |           |           |           |
|------------------------|-----------|-----------|-----------|---|-----------|-----------|-----------|
| C                      | -6.650332 | -1.333692 | -3.093216 | H | -4.606568 | -1.635885 | 2.309769  |
| H                      | -8.062209 | -1.687571 | -1.503692 | H | -5.305985 | 3.161229  | 3.382680  |
| H                      | -5.025834 | -0.934755 | -4.447948 | H | -5.905983 | -0.994323 | 4.282932  |
| H                      | -7.342360 | -1.618487 | -3.879271 | H | -6.294892 | 1.407691  | 4.818699  |
| H                      | 2.606816  | 4.951787  | 2.947385  | C | -2.425249 | -3.995068 | -0.512601 |
| H                      | 1.819983  | 5.888060  | -1.156516 | H | -2.144773 | -5.025210 | -0.717685 |
| H                      | -2.759761 | -3.851506 | -2.672596 | C | -1.443576 | -3.054660 | -0.323853 |
| H                      | -3.620387 | -3.530654 | 1.508041  | C | -3.774356 | 2.775500  | 1.223894  |
| C                      | 1.659462  | 6.940988  | 1.358189  | H | -3.882470 | 3.815615  | 1.521344  |
| H                      | 1.331662  | 7.525507  | 0.494269  | C | -2.996132 | 2.466969  | 0.136610  |
| H                      | 0.816518  | 6.855610  | 2.051848  | O | -0.341368 | -0.502349 | -2.385534 |
| H                      | 2.441506  | 7.510530  | 1.869333  | H | 0.663572  | -0.797409 | -2.685713 |
| C                      | 2.637294  | 3.575564  | -2.262104 | C | 0.013634  | -3.370122 | -0.386967 |
| H                      | 1.982163  | 4.254039  | -2.813316 | C | 0.783421  | -3.311254 | 0.788320  |
| H                      | 3.634956  | 3.629753  | -2.709767 | C | 0.616264  | -3.703284 | -1.612244 |
| H                      | 2.269316  | 2.555206  | -2.398342 | C | 2.151570  | -3.571477 | 0.717546  |
| C                      | 3.606504  | 2.467692  | 2.594776  | C | 1.987132  | -3.960304 | -1.636838 |
| H                      | 2.939689  | 1.604552  | 2.683524  | C | 2.774571  | -3.877879 | -0.489866 |
| H                      | 4.602574  | 2.088651  | 2.346859  | C | -2.224905 | 3.502820  | -0.611220 |
| H                      | 3.658275  | 2.961884  | 3.567111  | C | -1.061041 | 4.041798  | -0.043349 |
| C                      | -0.082806 | -3.524141 | -2.554093 | C | -2.650348 | 3.909173  | -1.887037 |
| H                      | 0.310044  | -2.520298 | -2.739420 | C | -0.345983 | 5.000724  | -0.763661 |
| H                      | 0.770621  | -4.173796 | -2.337327 | C | -1.912350 | 4.872165  | -2.569406 |
| H                      | -0.561701 | -3.881032 | -3.468393 | C | -0.756745 | 5.431372  | -2.021315 |
| C                      | -1.112307 | -3.097002 | 2.399918  | N | 4.021498  | -0.429477 | -0.502464 |
| H                      | -1.982527 | -2.961771 | 3.047460  | C | 2.873218  | -0.726214 | -1.113536 |
| H                      | -0.527996 | -3.933013 | 2.794576  | N | 5.177124  | -0.322215 | -0.530964 |
| H                      | -0.484527 | -2.201567 | 2.467741  | H | 1.970232  | -0.754037 | -0.523184 |
| C                      | -4.801700 | -4.036624 | -0.907841 | C | 2.869131  | -1.061725 | -2.487553 |
| H                      | -4.949590 | -5.109041 | -1.075666 | O | 1.837976  | -1.197000 | -3.183893 |
| H                      | -5.446148 | -3.736388 | -0.078038 | O | 4.069724  | -1.224228 | -3.045800 |
| H                      | -5.136563 | -3.509087 | -1.806188 | C | 4.072189  | -1.513166 | -4.444062 |
| <b>TS-[4+2]-A1-S-2</b> |           |           |           | H | 5.121186  | -1.585479 | -4.723906 |
| P                      | -0.647048 | 0.266512  | -1.093631 | H | 3.576593  | -0.715467 | -5.000015 |
| O                      | 0.304225  | 1.301996  | -0.603983 | H | 3.554997  | -2.454914 | -4.638247 |
| O                      | -0.861983 | -0.779113 | 0.126221  | C | 3.711100  | -0.122180 | 2.280764  |
| O                      | -2.144811 | 0.791015  | -1.355637 | C | 5.155319  | -0.143185 | 2.187263  |
| C                      | -1.860789 | -1.727835 | -0.039724 | C | 5.838680  | -1.158925 | 2.950066  |
| C                      | -3.177573 | -1.340509 | 0.092854  | C | 5.180738  | -2.039246 | 3.748870  |
| C                      | -2.891244 | 1.097942  | -0.222224 | C | 3.754774  | -2.003638 | 3.839727  |
| C                      | -3.469016 | 0.066714  | 0.487546  | C | 3.053520  | -1.097387 | 3.108139  |
| C                      | -4.192081 | -2.315849 | -0.173498 | H | 6.921439  | -1.192949 | 2.873588  |
| C                      | -6.132083 | -4.288380 | -0.715778 | H | 5.737509  | -2.772743 | 4.323437  |
| C                      | -5.575194 | -1.990822 | -0.196576 | H | 3.236573  | -2.697403 | 4.494050  |
| C                      | -3.802583 | -3.654290 | -0.465008 | H | 1.972141  | -1.059378 | 3.163541  |
| C                      | -4.804787 | -4.627152 | -0.721145 | C | 2.889214  | 0.733005  | 1.520306  |
| C                      | -6.517751 | -2.951250 | -0.460448 | C | 5.889266  | 0.575357  | 1.251673  |
| H                      | -5.877401 | -0.965732 | -0.010671 | H | 6.952885  | 0.375306  | 1.176752  |
| H                      | -4.493482 | -5.646397 | -0.932038 | H | 5.560244  | 1.513222  | 0.831674  |
| H                      | -7.568938 | -2.682835 | -0.479821 | O | 1.625831  | 0.382058  | 1.382773  |
| H                      | -6.889088 | -5.038796 | -0.918191 | H | 1.112472  | 0.934060  | 0.713076  |
| C                      | -4.227396 | 0.397644  | 1.659274  | C | 3.246833  | 2.113763  | 1.093358  |
| C                      | -5.714341 | 1.137433  | 3.942864  | C | 3.797030  | 2.972197  | 2.055094  |
| C                      | -4.774446 | -0.587343 | 2.526779  | C | 2.925452  | 2.608952  | -0.173781 |
| C                      | -4.405737 | 1.769321  | 1.999155  | C | 4.023887  | 4.308099  | 1.750640  |
| C                      | -5.171122 | 2.109578  | 3.145916  | H | 4.040907  | 2.580441  | 3.037965  |
| C                      | -5.499195 | -0.226033 | 3.633528  | C | 3.164797  | 3.947128  | -0.474827 |
|                        |           |           |           | H | 2.482109  | 1.954933  | -0.915915 |

|                        |           |           |           |   |           |           |           |
|------------------------|-----------|-----------|-----------|---|-----------|-----------|-----------|
| C                      | 3.708235  | 4.797970  | 0.483455  | H | -4.011334 | 4.558536  | 1.606586  |
| H                      | 4.441997  | 4.968640  | 2.502927  | H | 0.280387  | 6.896736  | 2.488921  |
| H                      | 2.911945  | 4.323146  | -1.460926 | H | -3.957447 | 6.521797  | 3.069430  |
| H                      | 3.885414  | 5.842234  | 0.245970  | H | -1.819314 | 7.725481  | 3.498480  |
| H                      | 2.459014  | -4.188229 | -2.591662 | C | -5.351179 | 1.064714  | -0.566301 |
| H                      | 2.748769  | -3.501143 | 1.623498  | H | -6.234202 | 0.459767  | -0.754813 |
| C                      | -0.177025 | -3.750268 | -2.894941 | C | -4.228513 | 0.481757  | -0.026045 |
| H                      | 0.496827  | -3.744791 | -3.754412 | C | 0.548804  | 4.744843  | 0.920704  |
| H                      | -0.795830 | -4.651826 | -2.952768 | H | 1.480033  | 5.252226  | 1.159830  |
| H                      | -0.842026 | -2.886827 | -2.977662 | C | 0.575346  | 3.620064  | 0.133047  |
| C                      | 0.157266  | -2.948837 | 2.111075  | O | -1.065780 | -0.595441 | -1.152783 |
| H                      | -0.026939 | -1.869544 | 2.162288  | H | -1.228695 | -1.943989 | -1.050850 |
| H                      | -0.800431 | -3.456773 | 2.255701  | C | -4.158118 | -0.983468 | 0.203301  |
| H                      | 0.820707  | -3.222569 | 2.935270  | C | -3.477067 | -1.542589 | 1.289618  |
| C                      | 4.270752  | -4.035907 | -0.574852 | C | -4.778253 | -1.849326 | -0.707720 |
| H                      | 4.550822  | -5.009003 | -0.989859 | C | -3.423945 | -2.923353 | 1.450010  |
| H                      | 4.694902  | -3.263455 | -1.226928 | C | -4.753105 | -3.221992 | -0.507948 |
| H                      | 4.735189  | -3.932497 | 0.408843  | C | -4.083869 | -3.775480 | 0.577791  |
| H                      | -2.242458 | 5.188787  | -3.556725 | H | -4.068514 | -4.849572 | 0.727534  |
| H                      | 0.563753  | 5.408910  | -0.327844 | C | 1.863219  | 3.055918  | -0.343954 |
| C                      | -3.878896 | 3.299300  | -2.511825 | C | 2.905281  | 2.847756  | 0.566692  |
| H                      | -3.709113 | 2.242170  | -2.741205 | C | 2.072638  | 2.747613  | -1.689146 |
| H                      | -4.737138 | 3.353400  | -1.835351 | C | 4.133450  | 2.369345  | 0.128084  |
| H                      | -4.138964 | 3.811496  | -3.440502 | C | 3.313395  | 2.280797  | -2.113932 |
| C                      | 0.018245  | 6.481931  | -2.775236 | C | 4.355250  | 2.093282  | -1.216921 |
| H                      | 0.140309  | 6.205551  | -3.826156 | H | 5.309343  | 1.701918  | -1.551985 |
| H                      | -0.499285 | 7.446486  | -2.749196 | H | -5.267818 | -1.448616 | -1.588491 |
| H                      | 1.011235  | 6.626846  | -2.342161 | H | -2.976362 | -0.906046 | 2.008180  |
| C                      | -0.554695 | 3.603219  | 1.308928  | H | 1.267161  | 2.874892  | -2.405684 |
| H                      | 0.513196  | 3.824292  | 1.400928  | H | 2.739891  | 3.030918  | 1.623474  |
| H                      | -1.079374 | 4.120816  | 2.119610  | C | 3.487827  | 1.940936  | -3.567551 |
| H                      | -0.694798 | 2.530149  | 1.457828  | F | 2.651228  | 0.959547  | -3.936917 |
| <b>TS-[4+2]-A2-R-1</b> |           |           |           | F | 4.733872  | 1.523345  | -3.840975 |
| P                      | -0.726029 | 0.455835  | -0.131398 | F | 3.229404  | 2.991584  | -4.357595 |
| O                      | 0.439530  | 0.290852  | 0.797192  | C | 5.256860  | 2.154879  | 1.101204  |
| O                      | -2.001306 | 0.769909  | 0.833970  | F | 6.097066  | 3.200066  | 1.130977  |
| O                      | -0.636140 | 1.856130  | -0.961721 | F | 5.990297  | 1.078774  | 0.764037  |
| C                      | -3.118656 | 1.329273  | 0.249099  | F | 4.813194  | 1.967486  | 2.350192  |
| C                      | -3.106580 | 2.679153  | -0.033133 | C | -5.378183 | -4.158927 | -1.500868 |
| C                      | -0.663547 | 2.998024  | -0.179636 | F | -6.140152 | -5.078897 | -0.891616 |
| C                      | -1.877028 | 3.455398  | 0.290687  | F | -4.437507 | -4.834154 | -2.186428 |
| C                      | -4.251177 | 3.257284  | -0.669145 | F | -6.141654 | -3.520484 | -2.393638 |
| C                      | -6.557816 | 4.321348  | -1.895088 | C | -2.529775 | -3.484229 | 2.516117  |
| C                      | -4.286349 | 4.609211  | -1.105220 | F | -2.828973 | -4.760077 | 2.806696  |
| C                      | -5.392316 | 2.439623  | -0.903288 | F | -2.577970 | -2.780801 | 3.650661  |
| C                      | -6.544954 | 3.007812  | -1.508428 | F | -1.242058 | -3.475025 | 2.106638  |
| C                      | -5.408993 | 5.124552  | -1.700711 | N | 2.145154  | -3.511181 | -0.330283 |
| H                      | -3.408206 | 5.230464  | -0.968126 | C | 1.028491  | -2.886537 | -0.753758 |
| H                      | -7.411798 | 2.373242  | -1.669731 | N | 2.701379  | -4.457450 | 0.023968  |
| H                      | -5.415411 | 6.157730  | -2.031996 | H | 1.091462  | -1.844142 | -1.022109 |
| H                      | -7.439996 | 4.745930  | -2.362320 | C | -0.183839 | -3.572940 | -0.743911 |
| C                      | -1.891039 | 4.598466  | 1.155420  | O | -1.317992 | -3.012246 | -0.969157 |
| C                      | -1.827547 | 6.855090  | 2.851014  | O | -0.153128 | -4.864659 | -0.490326 |
| C                      | -3.075335 | 5.077331  | 1.778951  | C | -1.387176 | -5.579982 | -0.373404 |
| C                      | -0.663170 | 5.257722  | 1.445424  | H | -1.141522 | -6.617429 | -0.592401 |
| C                      | -0.664661 | 6.399610  | 2.289475  | H | -1.751165 | -5.492800 | 0.652066  |
| C                      | -3.042458 | 6.174971  | 2.600551  | H | -2.129452 | -5.200761 | -1.075865 |
|                        |           |           |           | C | 4.306926  | -1.828519 | -0.638542 |

|   |          |           |           |
|---|----------|-----------|-----------|
| C | 5.027770 | -3.046000 | -0.328890 |
| C | 5.986398 | -3.497100 | -1.310339 |
| C | 6.193572 | -2.844849 | -2.483251 |
| C | 5.417195 | -1.690647 | -2.813777 |
| C | 4.495493 | -1.225608 | -1.931698 |
| H | 6.549548 | -4.395787 | -1.076774 |
| H | 6.936525 | -3.211507 | -3.184497 |
| H | 5.557849 | -1.188871 | -3.764989 |
| H | 3.874550 | -0.375968 | -2.179857 |
| C | 3.337811 | -1.242204 | 0.202776  |
| C | 4.696276 | -3.914960 | 0.701908  |
| H | 5.208158 | -4.870929 | 0.745122  |
| H | 4.196267 | -3.611092 | 1.608190  |
| O | 2.530804 | -0.359692 | -0.330376 |
| H | 1.741028 | -0.040892 | 0.264286  |
| C | 3.264878 | -1.419024 | 1.678892  |
| C | 4.416282 | -1.186492 | 2.440047  |
| C | 2.064771 | -1.749086 | 2.315587  |
| C | 4.367587 | -1.300559 | 3.823697  |
| H | 5.340835 | -0.919004 | 1.939639  |
| C | 2.028727 | -1.881318 | 3.699764  |
| H | 1.164048 | -1.907188 | 1.732697  |
| C | 3.176889 | -1.658075 | 4.454552  |
| H | 5.260406 | -1.111286 | 4.410261  |
| H | 1.096670 | -2.156355 | 4.182589  |
| H | 3.144204 | -1.756645 | 5.534843  |

**TS-[4+2]-A2-R-2**

|   |           |           |           |
|---|-----------|-----------|-----------|
| P | -0.591286 | 0.662920  | 0.507658  |
| O | -0.612253 | -0.694760 | -0.118654 |
| O | -0.198625 | 1.740929  | -0.655489 |
| O | -2.091910 | 1.166060  | 0.884404  |
| C | -0.384221 | 3.064059  | -0.298017 |
| C | -1.652480 | 3.601123  | -0.343046 |
| C | -2.935687 | 1.506014  | -0.156453 |
| C | -2.771466 | 2.723917  | -0.783056 |
| C | -1.840215 | 4.946512  | 0.113016  |
| C | -2.129563 | 7.596178  | 1.040041  |
| C | -3.123104 | 5.551285  | 0.205984  |
| C | -0.706967 | 5.696541  | 0.538672  |
| C | -0.882727 | 7.032008  | 0.987245  |
| C | -3.261266 | 6.839686  | 0.655064  |
| H | -3.998808 | 4.977097  | -0.075293 |
| H | -0.006026 | 7.593242  | 1.297878  |
| H | -4.249802 | 7.281932  | 0.722255  |
| H | -2.254921 | 8.615883  | 1.388393  |
| C | -3.626631 | 3.051084  | -1.884713 |
| C | -5.360034 | 3.623065  | -4.036842 |
| C | -3.460857 | 4.229748  | -2.661450 |
| C | -4.662095 | 2.143954  | -2.245962 |
| C | -5.528329 | 2.465926  | -3.324229 |
| C | -4.305308 | 4.506386  | -3.706077 |
| H | -2.649913 | 4.909156  | -2.424036 |
| H | -6.320489 | 1.767430  | -3.578401 |
| H | -4.159697 | 5.409408  | -4.289733 |
| H | -6.022856 | 3.859086  | -4.862546 |
| C | 0.576280  | 5.091784  | 0.540914  |
| H | 1.431923  | 5.670748  | 0.878851  |

|   |           |           |           |
|---|-----------|-----------|-----------|
| C | 0.751126  | 3.791242  | 0.142885  |
| C | -4.792105 | 0.917355  | -1.549843 |
| H | -5.584736 | 0.232388  | -1.840148 |
| C | -3.938712 | 0.571095  | -0.530003 |
| O | 0.233357  | 0.938383  | 1.735973  |
| H | 1.260120  | 0.432931  | 2.363469  |
| C | 2.079387  | 3.124280  | 0.191859  |
| C | 2.727931  | 2.743297  | -0.981750 |
| C | 2.686845  | 2.864460  | 1.423975  |
| C | 3.982163  | 2.140208  | -0.921869 |
| C | 3.925998  | 2.238995  | 1.467944  |
| C | 4.588692  | 1.877375  | 0.298579  |
| C | -4.031580 | -0.755126 | 0.127333  |
| C | -4.182446 | -1.898771 | -0.656907 |
| C | -3.986413 | -0.894768 | 1.519459  |
| C | -4.300683 | -3.152111 | -0.062248 |
| C | -4.101974 | -2.151160 | 2.098596  |
| C | -4.264142 | -3.292297 | 1.317956  |
| N | 2.930877  | -2.669357 | 0.857457  |
| C | 2.456717  | -1.452742 | 1.179095  |
| N | 3.523113  | -3.624136 | 1.097912  |
| H | 1.831466  | -0.937832 | 0.468738  |
| C | 2.650287  | -0.992706 | 2.484537  |
| O | 2.094448  | 0.055253  | 2.963451  |
| O | 3.437341  | -1.694993 | 3.273213  |
| C | 3.506741  | -1.292320 | 4.648622  |
| H | 4.221856  | -1.972662 | 5.105139  |
| H | 2.525599  | -1.392875 | 5.115453  |
| H | 3.846717  | -0.260492 | 4.721777  |
| C | 2.873260  | -2.761742 | -2.565236 |
| C | 2.996065  | -3.808659 | -3.485927 |
| C | 4.052110  | -3.819203 | -4.386135 |
| C | 4.991979  | -2.788436 | -4.371537 |
| C | 4.865957  | -1.739426 | -3.465786 |
| C | 3.800872  | -1.719000 | -2.570081 |
| H | 4.140826  | -4.627720 | -5.104133 |
| H | 5.818848  | -2.800008 | -5.074389 |
| H | 5.586881  | -0.930757 | -3.459650 |
| H | 3.681761  | -0.901001 | -1.866014 |
| C | 1.696428  | -2.699009 | -1.663760 |
| O | 1.149992  | -1.508212 | -1.687478 |
| H | 0.388801  | -1.298903 | -1.034487 |
| C | 1.136053  | -3.807476 | -1.000037 |
| C | 1.907277  | -4.986638 | -0.626853 |
| C | -0.267001 | -3.765217 | -0.665945 |
| C | 1.173564  | -6.079603 | -0.031506 |
| C | -0.893927 | -4.825833 | -0.095248 |
| H | -0.847045 | -2.887991 | -0.931353 |
| C | -0.156765 | -6.009625 | 0.221599  |
| H | 1.735868  | -6.972067 | 0.226554  |
| H | -1.958506 | -4.792065 | 0.101119  |
| H | -0.670529 | -6.855186 | 0.668022  |
| H | 2.168822  | 3.117575  | 2.342970  |
| H | 2.254946  | 2.917697  | -1.943244 |
| H | 5.557523  | 1.391197  | 0.340169  |
| H | -3.865924 | -0.020542 | 2.148937  |
| H | -4.183382 | -1.814092 | -1.739618 |
| H | -4.357280 | -4.268932 | 1.778908  |



|   |           |           |           |
|---|-----------|-----------|-----------|
| C | -3.999939 | -2.289686 | 3.592519  |
| F | -2.730124 | -2.458851 | 3.985615  |
| F | -4.693018 | -3.349377 | 4.035696  |
| F | -4.467528 | -1.204187 | 4.223038  |
| C | -4.498380 | -4.348770 | -0.948892 |
| F | -5.732908 | -4.379513 | -1.471079 |
| F | -4.318574 | -5.499382 | -0.281738 |
| F | -3.639572 | -4.339230 | -1.978197 |
| C | 4.603661  | 1.942630  | 2.774431  |
| F | 5.728110  | 2.659546  | 2.917297  |
| F | 4.970113  | 0.646469  | 2.841941  |
| F | 3.827271  | 2.196252  | 3.832085  |
| C | 4.713415  | 1.840995  | -2.199199 |
| F | 5.672693  | 0.915729  | -2.010483 |
| F | 5.313307  | 2.933116  | -2.691274 |
| F | 3.892171  | 1.380483  | -3.150383 |
| C | 3.288812  | -5.046920 | -0.583393 |
| H | 3.752521  | -5.945198 | -0.190088 |
| H | 3.939927  | -4.373966 | -1.120117 |
| H | 2.260977  | -4.607338 | -3.483797 |

**TS-[4+2]-A2-S-1**

|   |           |           |           |
|---|-----------|-----------|-----------|
| P | 0.764022  | 0.383393  | -0.022751 |
| O | -0.300041 | -0.030750 | -0.993552 |
| O | 2.039122  | 0.840268  | -0.925092 |
| O | 0.400715  | 1.780308  | 0.734820  |
| C | 2.998582  | 1.597800  | -0.279504 |
| C | 2.764366  | 2.941895  | -0.087072 |
| C | 0.300782  | 2.901724  | -0.068377 |
| C | 1.455442  | 3.505230  | -0.520925 |
| C | 3.742969  | 3.713260  | 0.620757  |
| C | 5.724007  | 5.157996  | 2.019136  |
| C | 3.549362  | 5.080985  | 0.955212  |
| C | 4.942990  | 3.077005  | 1.048255  |
| C | 5.927680  | 3.833553  | 1.737057  |
| C | 4.514290  | 5.781513  | 1.632842  |
| H | 2.622187  | 5.567927  | 0.675261  |
| H | 6.841954  | 3.334422  | 2.045346  |
| H | 4.345551  | 6.824135  | 1.881386  |
| H | 6.479529  | 5.727459  | 2.549929  |
| C | 1.340943  | 4.611342  | -1.423153 |
| C | 1.031469  | 6.779853  | -3.199584 |
| C | 2.470601  | 5.220427  | -2.033016 |
| C | 0.045411  | 5.097329  | -1.757103 |
| C | -0.077719 | 6.199292  | -2.644201 |
| C | 2.318007  | 6.275016  | -2.896338 |
| H | 3.460148  | 4.834207  | -1.814200 |
| H | -1.072843 | 6.565505  | -2.880120 |
| H | 3.192108  | 6.723920  | -3.356519 |
| H | 0.927601  | 7.618009  | -3.880435 |
| C | 5.122755  | 1.690294  | 0.818614  |
| H | 6.036991  | 1.215502  | 1.165899  |
| C | 4.167283  | 0.935893  | 0.182480  |
| C | -1.101927 | 4.466961  | -1.213731 |
| H | -2.083733 | 4.864448  | -1.458429 |
| C | -1.001663 | 3.373498  | -0.388173 |
| O | 1.193930  | -0.541764 | 1.088038  |
| H | 1.456582  | -1.836920 | 0.993544  |

|   |           |           |           |
|---|-----------|-----------|-----------|
| C | 4.324900  | -0.531766 | 0.028392  |
| C | 4.123073  | -1.167884 | -1.201346 |
| C | 4.699268  | -1.300634 | 1.132597  |
| C | 4.335649  | -2.535916 | -1.319706 |
| C | 4.896821  | -2.671051 | 1.000606  |
| C | 4.734659  | -3.298087 | -0.226717 |
| H | 4.908949  | -4.364252 | -0.328986 |
| C | -2.210468 | 2.705894  | 0.157037  |
| C | -3.288210 | 2.412030  | -0.678722 |
| C | -2.319051 | 2.404540  | 1.519311  |
| C | -4.442990 | 1.830278  | -0.161951 |
| C | -3.483991 | 1.839334  | 2.022827  |
| C | -4.557535 | 1.538904  | 1.190390  |
| H | -5.455969 | 1.075874  | 1.586093  |
| N | -1.718811 | -3.721409 | 0.084460  |
| C | -0.697261 | -2.983000 | 0.548125  |
| N | -2.184509 | -4.720130 | -0.250682 |
| H | -0.850804 | -1.930377 | 0.712740  |
| C | 0.567553  | -3.566586 | 0.653936  |
| O | 1.636304  | -2.911214 | 0.919049  |
| O | 0.664500  | -4.863641 | 0.444316  |
| C | 1.984044  | -5.423118 | 0.387709  |
| H | 1.834023  | -6.499868 | 0.352189  |
| H | 2.487720  | -5.077253 | -0.517097 |
| H | 2.559978  | -5.135466 | 1.267774  |
| C | -3.288321 | -2.083649 | -1.606076 |
| C | -3.863617 | -3.382175 | -1.906376 |
| C | -3.823139 | -3.806587 | -3.284885 |
| C | -3.238228 | -3.060525 | -4.256861 |
| C | -2.627070 | -1.807645 | -3.941080 |
| C | -2.640072 | -1.350605 | -2.661702 |
| H | -4.269326 | -4.767446 | -3.523382 |
| H | -3.230798 | -3.415844 | -5.282527 |
| H | -2.173331 | -1.214103 | -4.726762 |
| H | -2.204378 | -0.383887 | -2.434264 |
| C | -3.312154 | -1.498887 | -0.324974 |
| C | -4.216636 | -4.318094 | -0.946615 |
| H | -4.551035 | -5.295903 | -1.276099 |
| H | -4.433419 | -4.063592 | 0.080427  |
| O | -2.482530 | -0.554198 | 0.041800  |
| H | -1.623928 | -0.396119 | -0.514310 |
| C | -4.368345 | -1.691946 | 0.697986  |
| C | -5.715149 | -1.742186 | 0.322737  |
| C | -4.023554 | -1.629338 | 2.050770  |
| C | -6.704354 | -1.737514 | 1.298745  |
| H | -5.974830 | -1.756236 | -0.730717 |
| C | -5.016172 | -1.638176 | 3.024362  |
| H | -2.978207 | -1.543029 | 2.328487  |
| C | -6.357217 | -1.688775 | 2.649137  |
| H | -7.748667 | -1.755283 | 1.005175  |
| H | -4.741459 | -1.574956 | 4.071739  |
| H | -7.133060 | -1.678491 | 3.407861  |
| H | 4.818956  | -0.827663 | 2.101908  |
| H | 3.804339  | -0.593486 | -2.063842 |
| H | -1.495162 | 2.628125  | 2.189197  |
| H | -3.219189 | 2.622055  | -1.742498 |
| C | 5.206345  | -3.502641 | 2.211630  |
| F | 5.839896  | -2.797041 | 3.155732  |

|   |           |           |           |
|---|-----------|-----------|-----------|
| F | 5.972801  | -4.558868 | 1.903379  |
| F | 4.083445  | -3.988532 | 2.770714  |
| C | 4.197745  | -3.208063 | -2.656399 |
| F | 3.672525  | -4.442125 | -2.528344 |
| F | 5.386618  | -3.360160 | -3.256830 |
| F | 3.413691  | -2.518304 | -3.488936 |
| C | -3.555558 | 1.546629  | 3.495588  |
| F | -2.811064 | 0.479362  | 3.833724  |
| F | -4.808451 | 1.299415  | 3.901051  |
| F | -3.091933 | 2.576960  | 4.218491  |
| C | -5.535413 | 1.454247  | -1.119399 |
| F | -6.674498 | 1.130663  | -0.494896 |
| F | -5.176887 | 0.395043  | -1.869415 |
| F | -5.807995 | 2.451270  | -1.974502 |

**TS-[4+2]-A2-S-2**

|   |           |           |           |
|---|-----------|-----------|-----------|
| P | -0.624775 | 0.625112  | 0.471646  |
| O | -0.696905 | -0.748543 | -0.112393 |
| O | -0.165592 | 1.629887  | -0.732729 |
| O | -2.103547 | 1.214678  | 0.802151  |
| C | -0.397356 | 2.975213  | -0.516185 |
| C | -1.669043 | 3.475831  | -0.698417 |
| C | -2.922548 | 1.397080  | -0.298748 |
| C | -2.750739 | 2.523392  | -1.075339 |
| C | -1.903357 | 4.860372  | -0.415117 |
| C | -2.285182 | 7.594848  | 0.169699  |
| C | -3.196546 | 5.446803  | -0.478282 |
| C | -0.810191 | 5.676803  | -0.005804 |
| C | -1.031575 | 7.052220  | 0.268232  |
| C | -3.379537 | 6.776400  | -0.196360 |
| H | -4.044810 | 4.826763  | -0.746045 |
| H | -0.184771 | 7.662726  | 0.568686  |
| H | -4.375357 | 7.204252  | -0.247559 |
| H | -2.445454 | 8.645969  | 0.384893  |
| C | -3.558305 | 2.673643  | -2.248341 |
| C | -5.184971 | 2.894209  | -4.542280 |
| C | -3.384344 | 3.745395  | -3.165072 |
| C | -4.545584 | 1.688653  | -2.536484 |
| C | -5.358592 | 1.835044  | -3.691583 |
| C | -4.177451 | 3.851908  | -4.278751 |
| H | -2.607706 | 4.478694  | -2.977860 |
| H | -6.114972 | 1.081308  | -3.891180 |
| H | -4.027156 | 4.675536  | -4.968950 |
| H | -5.807706 | 2.995110  | -5.424822 |
| C | 0.473950  | 5.099358  | 0.165803  |
| H | 1.293228  | 5.726850  | 0.507380  |
| C | 0.693173  | 3.765539  | -0.068150 |
| C | -4.681046 | 0.560001  | -1.689255 |
| H | -5.434256 | -0.187004 | -1.927044 |
| C | -3.878420 | 0.386188  | -0.588307 |
| O | 0.192429  | 0.912120  | 1.705583  |
| H | 1.243414  | 0.405019  | 2.235308  |
| C | 2.000632  | 3.115238  | 0.208407  |
| C | 2.723078  | 2.477604  | -0.806456 |
| C | 2.490435  | 3.089602  | 1.513066  |
| C | 3.928079  | 1.855805  | -0.511244 |
| C | 3.687042  | 2.436027  | 1.796924  |
| C | 4.419499  | 1.824935  | 0.790754  |

|   |           |           |           |
|---|-----------|-----------|-----------|
| C | -3.962550 | -0.831226 | 0.256424  |
| C | -3.971431 | -2.093671 | -0.339601 |
| C | -4.027381 | -0.741463 | 1.650485  |
| C | -4.055466 | -3.239506 | 0.445513  |
| C | -4.109121 | -1.893888 | 2.421763  |
| C | -4.126283 | -3.152279 | 1.830102  |
| N | 3.346870  | -2.266053 | 0.359533  |
| C | 2.709902  | -1.175316 | 0.824738  |
| N | 4.053392  | -3.161785 | 0.468208  |
| H | 2.107896  | -0.600711 | 0.137294  |
| C | 2.801146  | -0.893567 | 2.193412  |
| O | 2.117404  | 0.000030  | 2.793870  |
| O | 3.639576  | -1.619282 | 2.908692  |
| C | 3.588428  | -1.454949 | 4.334213  |
| H | 4.358857  | -2.117976 | 4.720954  |
| H | 2.605144  | -1.747056 | 4.706693  |
| H | 3.792206  | -0.420003 | 4.602585  |
| C | 2.923408  | -2.545311 | -2.508117 |
| C | 3.910221  | -3.595722 | -2.308051 |
| C | 5.119160  | -3.502653 | -3.098527 |
| C | 5.332938  | -2.505299 | -3.991490 |
| C | 4.361053  | -1.469640 | -4.168936 |
| C | 3.221903  | -1.481338 | -3.432881 |
| H | 5.863511  | -4.280482 | -2.956219 |
| H | 6.247973  | -2.487246 | -4.575239 |
| H | 4.540649  | -0.675318 | -4.885024 |
| H | 2.481208  | -0.699457 | -3.550453 |
| C | 1.711561  | -2.452428 | -1.803361 |
| C | 3.868563  | -4.546363 | -1.307570 |
| H | 4.724904  | -5.200006 | -1.180071 |
| H | 2.966921  | -4.839556 | -0.792708 |
| O | 1.137558  | -1.266087 | -1.755741 |
| H | 0.294039  | -1.200658 | -1.193734 |
| C | 0.928837  | -3.609753 | -1.298782 |
| C | 0.774516  | -4.720081 | -2.140872 |
| C | 0.247574  | -3.569914 | -0.078473 |
| C | -0.042658 | -5.775619 | -1.763129 |
| H | 1.301302  | -4.741033 | -3.089906 |
| C | -0.571473 | -4.632387 | 0.293975  |
| H | 0.342143  | -2.704738 | 0.568105  |
| C | -0.719080 | -5.732918 | -0.544464 |
| H | -0.164614 | -6.626509 | -2.424994 |
| H | -1.107583 | -4.592087 | 1.236708  |
| H | -1.376779 | -6.546187 | -0.257668 |
| H | 1.905523  | 3.527373  | 2.315389  |
| H | 2.336547  | 2.460749  | -1.819621 |
| H | 5.345076  | 1.305037  | 1.016541  |
| H | -4.014063 | 0.229476  | 2.132785  |
| H | -3.879929 | -2.182676 | -1.417292 |
| H | -4.192372 | -4.047485 | 2.438670  |
| C | -4.122254 | -1.787219 | 3.921249  |
| F | -2.881950 | -1.837526 | 4.428629  |
| F | -4.813388 | -2.792852 | 4.478802  |
| F | -4.671615 | -0.637420 | 4.332229  |
| C | -4.129795 | -4.589676 | -0.208797 |
| F | -5.399600 | -4.950797 | -0.449541 |
| F | -3.599123 | -5.546524 | 0.574962  |
| F | -3.484584 | -4.617833 | -1.380091 |

|                        |           |           |           |   |           |           |           |
|------------------------|-----------|-----------|-----------|---|-----------|-----------|-----------|
| C                      | 4.198279  | 2.377635  | 3.207158  | H | 3.092717  | 1.855804  | -2.652604 |
| F                      | 5.038041  | 3.386905  | 3.479047  | C | 2.471831  | 3.661807  | -3.587683 |
| F                      | 4.883229  | 1.236461  | 3.422250  | C | 3.140628  | 4.472962  | 3.777020  |
| F                      | 3.210764  | 2.429968  | 4.106114  | H | 3.836200  | 2.543166  | 4.498905  |
| C                      | 4.723157  | 1.146016  | -1.569285 | H | 2.475965  | 6.243610  | 2.788553  |
| F                      | 4.785322  | -0.171124 | -1.320542 | H | 2.210067  | 6.436407  | 0.367507  |
| F                      | 5.989266  | 1.589611  | -1.604599 | C | 2.132269  | 5.037709  | -3.423270 |
| F                      | 4.201846  | 1.316645  | -2.790192 | H | 1.892422  | 6.649203  | -2.044182 |
| <b>TS-[4+2]-A3-R-1</b> |           |           |           | H | 2.422026  | 3.215715  | -4.575425 |
| P                      | 0.550848  | 0.048248  | -0.218191 | H | 3.105243  | 4.912262  | 4.768656  |
| O                      | -0.611324 | -0.054915 | 0.702847  | H | 1.850907  | 5.626737  | -4.290508 |
| O                      | 1.850279  | 0.400155  | 0.689006  | C | -0.784214 | -3.509142 | -0.327262 |
| O                      | 0.976364  | -1.360380 | -0.897045 | C | -1.937622 | -3.270805 | 0.440498  |
| C                      | 3.098599  | 0.192986  | 0.130947  | C | -0.889551 | -3.911428 | -1.674376 |
| C                      | 3.577123  | -1.095317 | 0.013105  | C | -1.879456 | -2.773881 | 1.786413  |
| C                      | 1.440028  | -2.329230 | -0.022684 | C | -3.231792 | -3.489946 | -0.144624 |
| C                      | 2.724846  | -2.226539 | 0.467633  | C | -2.187534 | -4.106193 | -2.253651 |
| C                      | 4.850985  | -1.296533 | -0.611485 | C | 0.257705  | -4.149284 | -2.497365 |
| C                      | 7.367083  | -1.604506 | -1.852988 | C | -3.019472 | -2.547451 | 2.498549  |
| C                      | 5.373445  | -2.588739 | -0.892481 | H | -0.910782 | -2.542762 | 2.215389  |
| C                      | 5.611718  | -0.160116 | -1.006046 | C | -4.402956 | -3.265425 | 0.648285  |
| C                      | 6.879850  | -0.346599 | -1.617496 | C | -3.325904 | -3.904393 | -1.471090 |
| C                      | 6.596596  | -2.735948 | -1.494652 | C | -2.286509 | -4.517990 | -3.619355 |
| H                      | 4.788083  | -3.463672 | -0.632920 | H | 1.246816  | -4.013391 | -2.072938 |
| H                      | 7.450088  | 0.532868  | -1.902877 | C | 0.121841  | -4.537961 | -3.797373 |
| H                      | 6.975432  | -3.730872 | -1.704688 | C | -4.301406 | -2.819906 | 1.930525  |
| H                      | 8.335136  | -1.737884 | -2.324291 | H | -2.961385 | -2.137307 | 3.502609  |
| C                      | 3.166021  | -3.191205 | 1.430777  | H | -5.373666 | -3.448388 | 0.194921  |
| C                      | 3.954422  | -5.125384 | 3.327222  | H | -4.309127 | -4.069066 | -1.907963 |
| C                      | 4.421641  | -3.096468 | 2.090502  | C | -1.169446 | -4.725642 | -4.370890 |
| C                      | 2.299854  | -4.266764 | 1.774690  | H | -3.277168 | -4.660402 | -4.042187 |
| C                      | 2.729503  | -5.231597 | 2.723890  | H | 1.004380  | -4.706985 | -4.405629 |
| C                      | 4.802981  | -4.037870 | 3.011898  | H | -5.192706 | -2.651041 | 2.526256  |
| H                      | 5.075487  | -2.261696 | 1.863131  | H | -1.255362 | -5.035723 | -5.407179 |
| H                      | 2.059581  | -6.051443 | 2.967021  | N | -3.668490 | 2.613997  | -0.484077 |
| H                      | 5.763076  | -3.945235 | 3.509015  | C | -2.423653 | 2.352529  | -0.893797 |
| H                      | 4.272652  | -5.864959 | 4.054444  | N | -4.509337 | 3.376438  | -0.244379 |
| C                      | 5.084057  | 1.140104  | -0.805141 | H | -2.125494 | 1.323974  | -1.014263 |
| H                      | 5.672763  | 2.002107  | -1.108218 | C | -1.513377 | 3.410019  | -1.112218 |
| C                      | 3.839134  | 1.337669  | -0.260643 | O | -0.301451 | 3.249597  | -1.402820 |
| C                      | 1.016424  | -4.352066 | 1.177614  | O | -2.004763 | 4.637726  | -0.976006 |
| H                      | 0.368000  | -5.185698 | 1.434618  | C | -1.076427 | 5.706597  | -1.162871 |
| C                      | 0.565109  | -3.399294 | 0.298241  | H | -1.648790 | 6.618158  | -1.000719 |
| O                      | 0.502569  | 0.978128  | -1.433442 | H | -0.255373 | 5.625827  | -0.446669 |
| H                      | 0.127262  | 2.030237  | -1.400837 | H | -0.662674 | 5.677935  | -2.172538 |
| C                      | 3.296942  | 2.714492  | -0.077034 | C | -5.237732 | 0.288510  | -0.413163 |
| C                      | 3.248183  | 3.278166  | 1.213265  | C | -6.274145 | 1.287869  | -0.267517 |
| C                      | 2.903722  | 3.463816  | -1.201031 | C | -7.340252 | 1.260139  | -1.238191 |
| C                      | 3.615524  | 2.544016  | 2.386704  | C | -7.392797 | 0.343214  | -2.239209 |
| C                      | 2.832464  | 4.642393  | 1.372659  | C | -6.350140 | -0.621681 | -2.388195 |
| C                      | 2.515600  | 4.836375  | -1.032049 | C | -5.302209 | -0.625703 | -1.522315 |
| C                      | 2.851989  | 2.904700  | -2.520516 | H | -8.121864 | 2.007574  | -1.139021 |
| C                      | 3.559237  | 3.118870  | 3.621792  | H | -8.225288 | 0.346792  | -2.935801 |
| H                      | 3.938638  | 1.513733  | 2.281413  | H | -6.397245 | -1.348290 | -3.192456 |
| C                      | 2.792105  | 5.209190  | 2.685245  | H | -4.498663 | -1.346868 | -1.624872 |
| C                      | 2.495749  | 5.393150  | 0.245319  | C | -4.086301 | 0.223395  | 0.399473  |
| C                      | 2.154937  | 5.603234  | -2.185054 | C | -6.190647 | 2.390570  | 0.576538  |
|                        |           |           |           | H | -6.956451 | 3.154197  | 0.489038  |

|   |           |           |           |
|---|-----------|-----------|-----------|
| H | -5.638027 | 2.392672  | 1.502627  |
| O | -3.052044 | -0.418390 | -0.103678 |
| H | -2.218228 | -0.402511 | 0.441015  |
| C | -4.015631 | 0.603702  | 1.832925  |
| C | -5.085920 | 0.263575  | 2.671883  |
| C | -2.857663 | 1.160027  | 2.381333  |
| C | -4.998444 | 0.479572  | 4.039420  |
| H | -5.980566 | -0.170638 | 2.235324  |
| C | -2.779026 | 1.383048  | 3.754073  |
| H | -2.018793 | 1.411120  | 1.740577  |
| C | -3.841739 | 1.040903  | 4.583641  |
| H | -5.828308 | 0.207355  | 4.683375  |
| H | -1.878359 | 1.819945  | 4.171841  |
| H | -3.772654 | 1.209471  | 5.653564  |

**TS-[4+2]-A3-R-2**

|   |           |           |           |
|---|-----------|-----------|-----------|
| P | -0.709369 | -0.046726 | 1.068631  |
| O | 0.163332  | -1.209559 | 0.800507  |
| O | -0.851441 | 0.816372  | -0.309948 |
| O | -2.255694 | -0.426924 | 1.346121  |
| C | -1.769378 | 1.853462  | -0.294358 |
| C | -3.114997 | 1.563766  | -0.392554 |
| C | -3.013006 | -0.819798 | 0.252947  |
| C | -3.518454 | 0.146198  | -0.593014 |
| C | -4.050577 | 2.643130  | -0.283987 |
| C | -5.829599 | 4.820645  | -0.066138 |
| C | -5.455167 | 2.434014  | -0.228632 |
| C | -3.558833 | 3.975478  | -0.189501 |
| C | -4.480034 | 5.052141  | -0.094504 |
| C | -6.318714 | 3.493962  | -0.122560 |
| H | -5.837897 | 1.419662  | -0.261781 |
| H | -4.088547 | 6.063638  | -0.033796 |
| H | -7.387712 | 3.314069  | -0.074863 |
| H | -6.525642 | 5.649168  | 0.012071  |
| C | -4.307937 | -0.273669 | -1.714978 |
| C | -5.870956 | -1.186732 | -3.884407 |
| C | -4.772433 | 0.626885  | -2.713350 |
| C | -4.607064 | -1.657243 | -1.867526 |
| C | -5.408373 | -2.084290 | -2.959539 |
| C | -5.533586 | 0.181912  | -3.763832 |
| H | -4.514031 | 1.676953  | -2.642036 |
| H | -5.634592 | -3.142874 | -3.050553 |
| H | -5.875796 | 0.886884  | -4.514480 |
| H | -6.479988 | -1.522115 | -4.717279 |
| C | -2.159881 | 4.208085  | -0.168145 |
| H | -1.795127 | 5.229865  | -0.100379 |
| C | -1.257048 | 3.173832  | -0.194008 |
| C | -4.042801 | -2.598437 | -0.970054 |
| H | -4.219404 | -3.657950 | -1.136046 |
| C | -3.221885 | -2.210726 | 0.058921  |
| O | -0.375217 | 0.918371  | 2.216409  |
| H | 0.643844  | 1.088197  | 2.561230  |
| C | 0.212045  | 3.403842  | -0.118342 |
| C | 1.026347  | 3.104205  | -1.229039 |
| C | 0.774993  | 3.946364  | 1.052743  |
| C | 0.490415  | 2.639007  | -2.472473 |
| C | 2.445476  | 3.295913  | -1.138941 |
| C | 2.183688  | 4.224967  | 1.090675  |

|   |           |           |           |
|---|-----------|-----------|-----------|
| C | 0.000881  | 4.231220  | 2.226050  |
| C | 1.307595  | 2.341751  | -3.522977 |
| H | -0.585547 | 2.534385  | -2.573784 |
| C | 3.271925  | 2.930606  | -2.248956 |
| C | 2.990958  | 3.858926  | 0.014437  |
| C | 2.734978  | 4.860573  | 2.247108  |
| H | -1.046204 | 3.951961  | 2.242041  |
| C | 0.568353  | 4.823957  | 3.314039  |
| C | 2.723075  | 2.461558  | -3.405210 |
| H | 0.881473  | 1.991884  | -4.458054 |
| H | 4.347377  | 3.045382  | -2.143945 |
| H | 4.066032  | 4.011828  | 0.075976  |
| C | 1.951661  | 5.170711  | 3.317455  |
| H | 3.798747  | 5.084319  | 2.247823  |
| H | -0.034385 | 5.028583  | 4.192738  |
| H | 3.355763  | 2.191521  | -4.244927 |
| H | 2.380151  | 5.658673  | 4.187649  |
| C | -2.469509 | -3.212344 | 0.867325  |
| C | -1.326460 | -3.808588 | 0.300748  |
| C | -2.884497 | -3.545929 | 2.167054  |
| C | -0.828715 | -3.451439 | -0.996572 |
| C | -0.588778 | -4.776853 | 1.061311  |
| C | -2.146547 | -4.524045 | 2.914198  |
| C | -4.028267 | -2.942585 | 2.781473  |
| C | 0.301612  | -4.023321 | -1.501696 |
| H | -1.347550 | -2.688852 | -1.568272 |
| C | 0.588898  | -5.359769 | 0.491922  |
| C | -1.020976 | -5.117669 | 2.342744  |
| C | -2.584148 | -4.862426 | 4.233606  |
| H | -4.588135 | -2.199094 | 2.223103  |
| C | -4.409768 | -3.289034 | 4.043382  |
| C | 1.022524  | -4.998454 | -0.747751 |
| H | 0.667323  | -3.721299 | -2.479790 |
| H | 1.134765  | -6.091196 | 1.081481  |
| H | -0.460590 | -5.854018 | 2.914550  |
| C | -3.678734 | -4.266015 | 4.782631  |
| H | -2.017892 | -5.605634 | 4.788092  |
| H | -5.276757 | -2.818549 | 4.495639  |
| H | 1.924566  | -5.436230 | -1.163943 |
| H | -4.000138 | -4.528064 | 5.785379  |
| N | 3.833810  | 0.551717  | 0.206254  |
| C | 2.813350  | 0.583753  | 1.062602  |
| N | 4.808640  | 1.046664  | -0.204577 |
| H | 2.057275  | -0.177206 | 0.974485  |
| C | 2.835511  | 1.362176  | 2.247260  |
| O | 1.867208  | 1.429380  | 3.036437  |
| O | 3.986560  | 1.975300  | 2.529843  |
| C | 4.130228  | 2.452358  | 3.869276  |
| H | 5.003928  | 3.102846  | 3.859180  |
| H | 3.242888  | 2.998727  | 4.183399  |
| H | 4.300957  | 1.606015  | 4.539927  |
| C | 4.698544  | -2.031106 | -0.560428 |
| C | 5.683454  | -1.225441 | -1.239063 |
| C | 7.064056  | -1.542102 | -0.997486 |
| C | 7.439337  | -2.525061 | -0.133914 |
| C | 6.457737  | -3.265980 | 0.587839  |
| C | 5.134882  | -3.005592 | 0.397196  |
| H | 7.813414  | -0.954980 | -1.519996 |

|                        |           |           |           |   |           |           |           |
|------------------------|-----------|-----------|-----------|---|-----------|-----------|-----------|
| H                      | 8.492257  | -2.740969 | 0.017838  | C | 3.773290  | 2.150373  | 0.084024  |
| H                      | 6.767778  | -4.043993 | 1.277009  | C | 3.844868  | 2.590637  | 1.420849  |
| H                      | 4.374368  | -3.568760 | 0.925853  | C | 3.513870  | 3.063278  | -0.955933 |
| C                      | 3.309703  | -1.844324 | -0.719716 | C | 4.092130  | 1.696290  | 2.511553  |
| C                      | 5.373272  | -0.017679 | -1.869072 | C | 3.683484  | 3.985896  | 1.715655  |
| H                      | 6.193912  | 0.570588  | -2.268264 | C | 3.385854  | 4.461535  | -0.651631 |
| H                      | 4.400748  | 0.189295  | -2.295974 | C | 3.344594  | 2.652158  | -2.319847 |
| O                      | 2.545441  | -2.276561 | 0.265432  | C | 4.157002  | 2.153112  | 3.794356  |
| H                      | 1.580775  | -2.139532 | 0.130056  | H | 4.224658  | 0.639851  | 2.304564  |
| C                      | 2.631937  | -1.524091 | -2.000782 | C | 3.761728  | 4.424627  | 3.074750  |
| C                      | 3.093264  | -2.148077 | -3.169587 | C | 3.474899  | 4.888706  | 0.671889  |
| C                      | 1.438473  | -0.800655 | -2.028978 | C | 3.167702  | 5.388228  | -1.720470 |
| C                      | 2.350046  | -2.068397 | -4.339744 | H | 3.375859  | 1.593880  | -2.552379 |
| H                      | 4.020820  | -2.711201 | -3.141249 | C | 3.107567  | 3.564858  | -3.303672 |
| C                      | 0.687182  | -0.744126 | -3.199064 | C | 3.987961  | 3.538739  | 4.084202  |
| H                      | 1.083677  | -0.288291 | -1.142716 | H | 4.338688  | 1.457424  | 4.606959  |
| C                      | 1.134892  | -1.380552 | -4.352368 | H | 3.636331  | 5.484069  | 3.280652  |
| H                      | 2.705616  | -2.563343 | -5.237564 | H | 3.383946  | 5.949766  | 0.897123  |
| H                      | -0.248426 | -0.193969 | -3.194360 | C | 3.034985  | 4.958125  | -3.005436 |
| H                      | 0.542771  | -1.342209 | -5.261278 | H | 3.107293  | 6.446646  | -1.477037 |
| <b>TS-[4+2]-A3-S-1</b> |           |           |           | H | 2.967267  | 3.231259  | -4.326547 |
| P                      | 0.618152  | 0.115038  | -0.110902 | H | 4.043503  | 3.881482  | 5.112273  |
| O                      | -0.525110 | 0.214087  | 0.855868  | H | 2.867495  | 5.669782  | -3.808007 |
| O                      | 1.974201  | 0.074863  | 0.784233  | C | -1.461213 | -3.086664 | -0.128184 |
| O                      | 0.669037  | -1.334553 | -0.846289 | C | -2.429401 | -2.887524 | 0.878984  |
| C                      | 3.124372  | -0.302536 | 0.115256  | C | -1.839700 | -3.099328 | -1.485659 |
| C                      | 3.335027  | -1.638364 | -0.158438 | C | -2.096918 | -2.804467 | 2.272140  |
| C                      | 0.997133  | -2.436405 | -0.081316 | C | -3.809662 | -2.728246 | 0.510569  |
| C                      | 2.316549  | -2.632946 | 0.274725  | C | -3.219998 | -2.926366 | -1.837757 |
| C                      | 4.500309  | -2.005310 | -0.908370 | C | -0.899338 | -3.307362 | -2.546474 |
| C                      | 6.819760  | -2.643141 | -2.386253 | C | -3.060349 | -2.598823 | 3.216573  |
| C                      | 4.739675  | -3.333654 | -1.355587 | H | -1.057031 | -2.881077 | 2.568373  |
| C                      | 5.439845  | -0.995805 | -1.260342 | C | -4.786538 | -2.508653 | 1.532841  |
| C                      | 6.604271  | -1.349435 | -1.992464 | C | -4.172553 | -2.756845 | -0.834776 |
| C                      | 5.867440  | -3.641464 | -2.072479 | C | -3.597425 | -2.937950 | -3.217884 |
| H                      | 4.012365  | -4.105689 | -1.131278 | H | 0.145701  | -3.461083 | -2.301102 |
| H                      | 7.315056  | -0.566726 | -2.242100 | C | -1.297573 | -3.312225 | -3.850144 |
| H                      | 6.028378  | -4.660601 | -2.408598 | C | -4.428673 | -2.449111 | 2.846294  |
| H                      | 7.709973  | -2.903778 | -2.949014 | H | -2.781566 | -2.525200 | 4.263125  |
| C                      | 2.644727  | -3.761002 | 1.094687  | H | -5.822713 | -2.385544 | 1.227990  |
| C                      | 3.206997  | -6.018297 | 2.693680  | H | -5.216837 | -2.617355 | -1.110900 |
| C                      | 3.946228  | -3.973723 | 1.626321  | C | -2.667644 | -3.119384 | -4.196321 |
| C                      | 1.621358  | -4.693839 | 1.421962  | H | -4.647554 | -2.796840 | -3.458990 |
| C                      | 1.937463  | -5.827454 | 2.217291  | H | -0.565943 | -3.465614 | -4.636729 |
| C                      | 4.217452  | -5.071377 | 2.402260  | H | -5.175362 | -2.271129 | 3.613141  |
| H                      | 4.726527  | -3.250263 | 1.417935  | H | -2.962324 | -3.126996 | -5.240850 |
| H                      | 1.145111  | -6.534043 | 2.447729  | N | -3.028378 | 3.228101  | -0.309062 |
| H                      | 5.216194  | -5.212747 | 2.802359  | C | -1.839398 | 2.834651  | -0.785687 |
| H                      | 3.438798  | -6.884697 | 3.304203  | N | -3.781753 | 4.035704  | 0.023353  |
| C                      | 5.187220  | 0.352217  | -0.902188 | H | -1.656515 | 1.783239  | -0.927587 |
| H                      | 5.908042  | 1.116671  | -1.180934 | C | -0.824867 | 3.780512  | -0.959471 |
| C                      | 4.040671  | 0.720591  | -0.242608 | O | 0.378947  | 3.486826  | -1.268348 |
| C                      | 0.296030  | -4.462534 | 0.977607  | O | -1.131939 | 5.051073  | -0.775001 |
| H                      | -0.479620 | -5.177411 | 1.240602  | C | -0.054036 | 5.989986  | -0.864906 |
| C                      | -0.044561 | -3.341751 | 0.259048  | H | -0.500658 | 6.957859  | -0.647215 |
| O                      | 0.747335  | 1.103962  | -1.244866 | H | 0.723093  | 5.741927  | -0.138428 |
| H                      | 0.568167  | 2.401762  | -1.255603 | H | 0.380390  | 5.972077  | -1.865598 |
|                        |           |           |           | C | -3.997628 | 1.198391  | 1.405485  |

|                        |           |           |           |   |           |           |           |
|------------------------|-----------|-----------|-----------|---|-----------|-----------|-----------|
| C                      | -4.957433 | 2.250491  | 1.685441  | C | 1.219589  | 3.272989  | 0.205057  |
| C                      | -5.075834 | 2.671464  | 3.059455  | C | 3.629020  | -2.598401 | 1.578061  |
| C                      | -4.295318 | 2.157043  | 4.045712  | H | 3.785922  | -3.659758 | 1.752144  |
| C                      | -3.305388 | 1.172832  | 3.746576  | C | 3.064426  | -2.191082 | 0.394930  |
| C                      | -3.151956 | 0.731889  | 2.469192  | O | 0.599550  | 0.853302  | -2.241660 |
| H                      | -5.809828 | 3.439797  | 3.283850  | H | -0.398906 | 1.195756  | -2.377152 |
| H                      | -4.418737 | 2.500269  | 5.068371  | C | -0.155219 | 3.623216  | -0.252830 |
| H                      | -2.688981 | 0.762632  | 4.539060  | C | -1.272458 | 3.341929  | 0.558370  |
| H                      | -2.423471 | -0.042207 | 2.257227  | C | -0.321845 | 4.293151  | -1.485533 |
| C                      | -3.827570 | 0.603514  | 0.134367  | C | -1.161718 | 2.670480  | 1.818168  |
| C                      | -5.572050 | 3.022975  | 0.709867  | C | -2.584341 | 3.737134  | 0.125860  |
| H                      | -6.208717 | 3.842984  | 1.024409  | C | -1.627338 | 4.756472  | -1.864327 |
| H                      | -5.686412 | 2.701059  | -0.314901 | C | 0.753325  | 4.503975  | -2.410189 |
| O                      | -2.731861 | -0.006022 | -0.224004 | C | -2.270418 | 2.330669  | 2.532686  |
| H                      | -1.865498 | 0.119150  | 0.345624  | H | -0.178054 | 2.422955  | 2.200885  |
| C                      | -4.904423 | 0.403538  | -0.868007 | C | -3.725064 | 3.351482  | 0.901085  |
| C                      | -6.215910 | 0.132536  | -0.457681 | C | -2.725303 | 4.462884  | -1.055752 |
| C                      | -4.570854 | 0.314114  | -2.221118 | C | -1.784194 | 5.481280  | -3.088053 |
| C                      | -7.181835 | -0.207553 | -1.394877 | H | 1.730648  | 4.096565  | -2.179087 |
| H                      | -6.461831 | 0.181912  | 0.598646  | C | 0.556529  | 5.173422  | -3.582062 |
| C                      | -5.546197 | -0.009076 | -3.160103 | C | -3.578181 | 2.643353  | 2.055229  |
| H                      | -3.541859 | 0.477620  | -2.524803 | H | -2.165206 | 1.812114  | 3.478308  |
| C                      | -6.849601 | -0.274765 | -2.749578 | H | -4.711212 | 3.608942  | 0.524329  |
| H                      | -8.194015 | -0.427120 | -1.071335 | H | -3.717795 | 4.784266  | -1.366102 |
| H                      | -5.280337 | -0.071781 | -4.210403 | C | -0.727375 | 5.690160  | -3.921512 |
| H                      | -7.606950 | -0.538880 | -3.480831 | H | -2.774965 | 5.851944  | -3.339602 |
| <b>TS-[4+2]-A3-S-2</b> |           |           |           | H | 1.383904  | 5.306769  | -4.271316 |
| P                      | 0.778820  | -0.026655 | -0.988363 | H | -4.444695 | 2.313281  | 2.621522  |
| O                      | -0.113214 | -1.193885 | -0.788938 | H | -0.858867 | 6.235271  | -4.850573 |
| O                      | 0.669405  | 0.933197  | 0.316765  | C | 2.593809  | -3.177550 | -0.618384 |
| O                      | 2.350361  | -0.383280 | -1.018746 | C | 1.426066  | -3.919611 | -0.358472 |
| C                      | 1.620408  | 1.932351  | 0.456940  | C | 3.315178  | -3.367710 | -1.810571 |
| C                      | 2.893975  | 1.583572  | 0.861699  | C | 0.623053  | -3.715535 | 0.812559  |
| C                      | 2.880456  | -0.798005 | 0.197314  | C | 0.987199  | -4.897828 | -1.313573 |
| C                      | 3.191104  | 0.153438  | 1.145972  | C | 2.866255  | -4.346701 | -2.758770 |
| C                      | 3.888602  | 2.609319  | 0.955210  | C | 4.497615  | -2.620589 | -2.117293 |
| C                      | 5.781090  | 4.694075  | 1.132090  | C | -0.512291 | -4.440799 | 1.022482  |
| C                      | 5.256717  | 2.331334  | 1.223663  | H | 0.917605  | -2.951231 | 1.524276  |
| C                      | 3.502692  | 3.961019  | 0.737699  | C | -0.202625 | -5.647924 | -1.045467 |
| C                      | 4.475006  | 4.990892  | 0.847703  | C | 1.719235  | -5.091660 | -2.484307 |
| C                      | 6.174788  | 3.346123  | 1.309313  | C | 3.611052  | -4.537160 | -3.965337 |
| H                      | 5.571157  | 1.301481  | 1.351789  | H | 4.847019  | -1.879256 | -1.406011 |
| H                      | 4.159918  | 6.018314  | 0.689112  | C | 5.177195  | -2.829043 | -3.280380 |
| H                      | 7.215674  | 3.113554  | 1.509099  | C | -0.928687 | -5.432935 | 0.085846  |
| H                      | 6.518614  | 5.486029  | 1.209069  | H | -1.116475 | -4.255627 | 1.906008  |
| C                      | 3.708509  | -0.288168 | 2.408371  | H | -0.518781 | -6.386969 | -1.777013 |
| C                      | 4.736714  | -1.241601 | 4.858991  | H | 1.384407  | -5.835804 | -3.203705 |
| C                      | 3.943776  | 0.596975  | 3.496234  | C | 4.729281  | -3.802861 | -4.221277 |
| C                      | 3.959974  | -1.675851 | 2.602218  | H | 3.259787  | -5.282422 | -4.673649 |
| C                      | 4.491054  | -2.123761 | 3.840990  | H | 6.068505  | -2.249542 | -3.497655 |
| C                      | 4.445223  | 0.131975  | 4.684789  | H | -1.839906 | -5.992457 | 0.270464  |
| H                      | 3.714308  | 1.650042  | 3.381045  | H | 5.285360  | -3.953480 | -5.140807 |
| H                      | 4.686655  | -3.185014 | 3.965443  | N | -3.968598 | 0.257854  | -0.263412 |
| H                      | 4.614215  | 0.824031  | 5.503290  | C | -2.788697 | 0.644779  | -0.743186 |
| H                      | 5.139086  | -1.592782 | 5.803368  | N | -5.129655 | 0.295738  | -0.321963 |
| C                      | 2.164028  | 4.257077  | 0.382702  | H | -1.899618 | 0.358660  | -0.206060 |
| H                      | 1.883137  | 5.292993  | 0.210975  | C | -2.731296 | 1.390866  | -1.950668 |
|                        |           |           |           | O | -1.692143 | 1.669380  | -2.579723 |

|                        |           |           |           |   |           |           |           |
|------------------------|-----------|-----------|-----------|---|-----------|-----------|-----------|
| O                      | -3.918455 | 1.778504  | -2.426803 | H | 5.679611  | -1.683315 | 1.224636  |
| C                      | -3.892127 | 2.426148  | -3.698021 | H | 3.221435  | -5.896668 | 2.160970  |
| H                      | -4.924542 | 2.704396  | -3.903348 | H | 6.723823  | -3.445360 | 2.572672  |
| H                      | -3.520562 | 1.742848  | -4.464879 | H | 5.513932  | -5.574438 | 3.029179  |
| H                      | -3.246600 | 3.305646  | -3.667113 | C | 4.902470  | 2.070846  | -0.824403 |
| C                      | -3.848761 | -1.165680 | 2.211881  | H | 5.323012  | 3.050396  | -1.036697 |
| C                      | -5.279325 | -0.988905 | 2.072487  | C | 3.718447  | 1.984918  | -0.134216 |
| C                      | -5.969850 | -0.371014 | 3.177395  | C | 1.805095  | -4.139188 | 0.716770  |
| C                      | -5.337607 | -0.004466 | 4.323244  | H | 1.278438  | -5.061280 | 0.948471  |
| C                      | -3.927026 | -0.186813 | 4.453029  | C | 1.159926  | -3.165128 | -0.007325 |
| C                      | -3.214663 | -0.713847 | 3.421176  | O | 0.522654  | 1.355348  | -1.189607 |
| H                      | -7.040569 | -0.222754 | 3.072148  | H | 0.013351  | 2.308492  | -0.993680 |
| H                      | -5.902731 | 0.427532  | 5.143125  | C | 2.977382  | 3.195746  | 0.300769  |
| H                      | -3.427653 | 0.094552  | 5.374444  | C | 2.629969  | 3.375830  | 1.645671  |
| H                      | -2.141794 | -0.845273 | 3.502615  | C | 2.634086  | 4.169971  | -0.632000 |
| C                      | -3.006039 | -1.658447 | 1.192355  | C | 1.981466  | 4.532027  | 2.063265  |
| C                      | -5.984801 | -1.166929 | 0.886660  | C | 1.953554  | 5.326614  | -0.241182 |
| H                      | -7.026679 | -0.865200 | 0.868462  | C | 1.638453  | 4.752754  | 3.514567  |
| H                      | -5.695392 | -1.873975 | 0.125307  | C | 1.657480  | 5.501511  | 1.106807  |
| O                      | -1.727037 | -1.332600 | 1.286369  | C | 1.504312  | 6.320231  | -1.279285 |
| H                      | -1.160810 | -1.616663 | 0.525414  | H | 0.589180  | 5.039208  | 3.631564  |
| C                      | -3.371541 | -2.701718 | 0.200282  | H | 1.147701  | 6.409807  | 1.426071  |
| C                      | -4.176607 | -3.771398 | 0.617478  | H | 1.087512  | 7.219647  | -0.818467 |
| C                      | -2.836991 | -2.704885 | -1.092403 | C | -0.247768 | -3.353947 | -0.444076 |
| C                      | -4.480925 | -4.803110 | -0.260230 | C | -1.209977 | -3.756887 | 0.486410  |
| H                      | -4.573206 | -3.773142 | 1.628563  | C | -0.613540 | -3.202065 | -1.783674 |
| C                      | -3.149342 | -3.741166 | -1.967796 | C | -2.519850 | -4.030402 | 0.092448  |
| H                      | -2.183290 | -1.901293 | -1.415616 | C | -1.912768 | -3.484707 | -2.203596 |
| C                      | -3.973980 | -4.784591 | -1.560001 | C | -3.541596 | -4.487650 | 1.102470  |
| H                      | -5.109367 | -5.623844 | 0.070170  | C | -2.852010 | -3.896142 | -1.256167 |
| H                      | -2.735115 | -3.732569 | -2.970364 | C | -2.286043 | -3.349757 | -3.659190 |
| H                      | -4.213257 | -5.589919 | -2.247317 | H | -3.407057 | -5.547934 | 1.341325  |
|                        |           |           |           | H | -3.871979 | -4.101917 | -1.576020 |
|                        |           |           |           | H | -3.356518 | -3.513739 | -3.808805 |
|                        |           |           |           | N | -3.821896 | 2.012201  | -0.236266 |
|                        |           |           |           | C | -2.548193 | 2.114655  | -0.620446 |
|                        |           |           |           | N | -4.811797 | 2.507941  | 0.123629  |
|                        |           |           |           | H | -2.051871 | 1.226882  | -0.975437 |
|                        |           |           |           | C | -1.849874 | 3.339776  | -0.544994 |
|                        |           |           |           | O | -0.628575 | 3.460744  | -0.811137 |
|                        |           |           |           | O | -2.560231 | 4.394970  | -0.153022 |
|                        |           |           |           | C | -1.856019 | 5.633108  | -0.066573 |
|                        |           |           |           | H | -2.536856 | 6.321927  | 0.430437  |
|                        |           |           |           | H | -0.932450 | 5.510363  | 0.502395  |
|                        |           |           |           | H | -1.612896 | 5.999264  | -1.066987 |
|                        |           |           |           | C | -4.816798 | -0.467597 | -0.901620 |
|                        |           |           |           | C | -6.055074 | 0.222496  | -0.621681 |
|                        |           |           |           | C | -7.028825 | 0.256906  | -1.681644 |
|                        |           |           |           | C | -6.812528 | -0.325161 | -2.891773 |
|                        |           |           |           | C | -5.567771 | -0.964884 | -3.170544 |
|                        |           |           |           | C | -4.600673 | -1.006555 | -2.215083 |
|                        |           |           |           | H | -7.964662 | 0.770416  | -1.481819 |
|                        |           |           |           | H | -7.582936 | -0.291753 | -3.655651 |
|                        |           |           |           | H | -5.394187 | -1.412984 | -4.143569 |
|                        |           |           |           | H | -3.645226 | -1.479067 | -2.406243 |
|                        |           |           |           | C | -3.736416 | -0.532318 | 0.006540  |
|                        |           |           |           | C | -6.251847 | 1.057870  | 0.479096  |
|                        |           |           |           | H | -7.160152 | 1.651257  | 0.501729  |
| <b>TS-[4+2]-A4-R-1</b> |           |           |           |   |           |           |           |
| P                      | 0.704098  | 0.260989  | -0.127639 |   |           |           |           |
| O                      | -0.426824 | -0.099268 | 0.771049  |   |           |           |           |
| O                      | 1.989231  | 0.601242  | 0.795257  |   |           |           |           |
| O                      | 1.242966  | -0.978996 | -1.017332 |   |           |           |           |
| C                      | 3.207426  | 0.688440  | 0.134867  |   |           |           |           |
| C                      | 3.840253  | -0.474804 | -0.245087 |   |           |           |           |
| C                      | 1.889663  | -1.984214 | -0.309181 |   |           |           |           |
| C                      | 3.194274  | -1.774870 | 0.084697  |   |           |           |           |
| C                      | 5.053576  | -0.375510 | -0.999423 |   |           |           |           |
| C                      | 7.430091  | -0.093893 | -2.491555 |   |           |           |           |
| C                      | 5.723819  | -1.513410 | -1.524681 |   |           |           |           |
| C                      | 5.588566  | 0.914618  | -1.274868 |   |           |           |           |
| C                      | 6.793732  | 1.022759  | -2.018083 |   |           |           |           |
| C                      | 6.880100  | -1.374701 | -2.248936 |   |           |           |           |
| H                      | 5.304177  | -2.498513 | -1.352518 |   |           |           |           |
| H                      | 7.194947  | 2.013810  | -2.210729 |   |           |           |           |
| H                      | 7.375303  | -2.255100 | -2.645316 |   |           |           |           |
| H                      | 8.348197  | -0.000208 | -3.062090 |   |           |           |           |
| C                      | 3.841894  | -2.778211 | 0.875170  |   |           |           |           |
| C                      | 5.038948  | -4.801664 | 2.433860  |   |           |           |           |
| C                      | 5.146906  | -2.608793 | 1.412671  |   |           |           |           |
| C                      | 3.135905  | -3.976759 | 1.174915  |   |           |           |           |
| C                      | 3.770210  | -4.982870 | 1.951082  |   |           |           |           |
| C                      | 5.727861  | -3.594528 | 2.168600  |   |           |           |           |

|   |           |           |           |
|---|-----------|-----------|-----------|
| H | -5.784004 | 0.897703  | 1.437849  |
| O | -2.550943 | -0.804906 | -0.489092 |
| H | -1.785367 | -0.723112 | 0.157205  |
| C | -3.875273 | -0.549869 | 1.485522  |
| C | -4.848635 | -1.383423 | 2.051244  |
| C | -3.014096 | 0.175162  | 2.313065  |
| C | -4.963950 | -1.483877 | 3.431328  |
| H | -5.514398 | -1.939591 | 1.398027  |
| C | -3.144141 | 0.079077  | 3.695751  |
| H | -2.249571 | 0.808725  | 1.875249  |
| C | -4.113457 | -0.747571 | 4.255877  |
| H | -5.716218 | -2.135195 | 3.864043  |
| H | -2.480394 | 0.651174  | 4.335044  |
| H | -4.206673 | -0.821485 | 5.334598  |
| H | 2.329084  | 6.621369  | -1.931386 |
| H | 0.731672  | 5.866574  | -1.908928 |
| H | 2.865297  | 4.006045  | -1.681793 |
| H | 2.880326  | 2.603826  | 2.367941  |
| H | 1.811216  | 3.849305  | 4.102890  |
| H | 2.246168  | 5.555885  | 3.943439  |
| H | 0.129532  | -2.875123 | -2.506239 |
| H | -0.930559 | -3.843149 | 1.533824  |
| H | -2.035996 | -2.353833 | -4.038443 |
| H | -1.745027 | -4.077169 | -4.272061 |
| H | -3.455642 | -3.922834 | 2.034774  |
| H | -4.557592 | -4.360956 | 0.719606  |

**TS-[4+2]-A4-R-2**

|   |           |           |           |
|---|-----------|-----------|-----------|
| P | 0.648580  | -0.159992 | -1.106416 |
| O | -0.501372 | -1.023860 | -0.718071 |
| O | 1.128271  | 0.660729  | 0.210486  |
| O | 1.960541  | -1.007542 | -1.489016 |
| C | 2.386770  | 1.249991  | 0.158011  |
| C | 3.501967  | 0.442216  | 0.261820  |
| C | 2.516568  | -1.714236 | -0.425571 |
| C | 3.318133  | -1.022933 | 0.456177  |
| C | 4.797036  | 1.037512  | 0.125043  |
| C | 7.308723  | 2.292088  | -0.147351 |
| C | 5.994584  | 0.272082  | 0.091753  |
| C | 4.891186  | 2.448626  | -0.023325 |
| C | 6.170762  | 3.053613  | -0.143343 |
| C | 7.214532  | 0.883971  | -0.040428 |
| H | 5.933153  | -0.808134 | 0.162951  |
| H | 6.224704  | 4.133995  | -0.243591 |
| H | 8.117092  | 0.282359  | -0.069374 |
| H | 8.281791  | 2.761885  | -0.245170 |
| C | 3.870698  | -1.725919 | 1.575707  |
| C | 4.933918  | -3.196939 | 3.735402  |
| C | 4.624903  | -1.083290 | 2.594810  |
| C | 3.623109  | -3.122099 | 1.695170  |
| C | 4.185151  | -3.838574 | 2.785293  |
| C | 5.142572  | -1.800545 | 3.642761  |
| H | 4.782896  | -0.012210 | 2.540464  |
| H | 3.996525  | -4.906188 | 2.854325  |
| H | 5.713109  | -1.291129 | 4.412423  |
| H | 5.355417  | -3.751666 | 4.567133  |
| C | 3.708828  | 3.225138  | -0.076233 |
| H | 3.795779  | 4.303344  | -0.180176 |

|   |           |           |           |
|---|-----------|-----------|-----------|
| C | 2.456401  | 2.659527  | -0.013004 |
| C | 2.781133  | -3.768011 | 0.757057  |
| H | 2.577054  | -4.828243 | 0.880810  |
| C | 2.191251  | -3.090692 | -0.284256 |
| O | 0.499235  | 0.817506  | -2.276512 |
| H | -0.252966 | 1.614734  | -2.214949 |
| C | 1.246884  | 3.513033  | -0.149410 |
| C | 0.170227  | 3.427848  | 0.742578  |
| C | 1.220447  | 4.480639  | -1.155289 |
| C | -0.897912 | 4.319502  | 0.654998  |
| C | 0.150956  | 5.367642  | -1.277683 |
| C | -0.892297 | 5.281891  | -0.359302 |
| C | 1.187232  | -3.752043 | -1.155684 |
| C | 0.199088  | -4.536621 | -0.559318 |
| C | 1.197206  | -3.609211 | -2.547814 |
| C | -0.772539 | -5.183054 | -1.327206 |
| C | 0.236640  | -4.237861 | -3.334374 |
| C | -0.738689 | -5.022969 | -2.710601 |
| N | -3.727585 | 1.236766  | -0.256774 |
| C | -2.471611 | 1.545907  | -0.584794 |
| N | -4.868520 | 1.422956  | -0.385095 |
| H | -1.679219 | 0.945733  | -0.173813 |
| C | -2.217029 | 2.496357  | -1.604951 |
| O | -1.137604 | 2.603583  | -2.228698 |
| O | -3.239102 | 3.297025  | -1.906054 |
| C | -3.035922 | 4.179688  | -3.008643 |
| H | -3.982283 | 4.700431  | -3.142416 |
| H | -2.774409 | 3.616793  | -3.906567 |
| H | -2.233522 | 4.885116  | -2.782078 |
| C | -3.627438 | -0.161709 | 2.647136  |
| C | -4.576503 | -0.826228 | 3.429045  |
| C | -5.010214 | -0.258593 | 4.620235  |
| C | -4.505075 | 0.974660  | 5.032385  |
| C | -3.549910 | 1.631681  | 4.260424  |
| C | -3.098714 | 1.055961  | 3.077818  |
| H | -5.742609 | -0.777172 | 5.229969  |
| H | -4.853049 | 1.419522  | 5.959066  |
| H | -3.153269 | 2.589427  | 4.582226  |
| H | -2.345557 | 1.542531  | 2.465254  |
| C | -3.094889 | -0.777548 | 1.406886  |
| O | -1.785816 | -0.748630 | 1.396369  |
| H | -1.321122 | -0.964294 | 0.509892  |
| C | -3.863206 | -1.470091 | 0.445612  |
| C | -5.260078 | -1.177816 | 0.183418  |
| C | -3.199123 | -2.463740 | -0.358028 |
| C | -5.903204 | -1.960545 | -0.840541 |
| C | -3.863296 | -3.169592 | -1.311996 |
| H | -2.150912 | -2.681685 | -0.176701 |
| C | -5.246475 | -2.913962 | -1.552716 |
| H | -6.950468 | -1.753417 | -1.039959 |
| H | -3.336762 | -3.926228 | -1.885053 |
| H | -5.773514 | -3.482400 | -2.312698 |
| H | 2.041141  | 4.527667  | -1.866953 |
| H | 0.183717  | 2.676870  | 1.528502  |
| H | -1.725228 | 5.979847  | -0.429732 |
| H | 1.962633  | -3.000221 | -3.018626 |
| H | 0.172165  | -4.625582 | 0.524408  |
| H | -1.488745 | -5.521945 | -3.322158 |



|   |           |           |           |
|---|-----------|-----------|-----------|
| C | 0.227249  | -4.058865 | -4.831012 |
| C | -1.831734 | -6.022257 | -0.657388 |
| C | 0.126608  | 6.373639  | -2.399722 |
| C | -2.053336 | 4.251194  | 1.620047  |
| H | 0.002112  | 5.869360  | -3.364102 |
| H | 1.060987  | 6.939955  | -2.447261 |
| H | -0.695156 | 7.084065  | -2.279405 |
| H | -2.449688 | 5.247880  | 1.830279  |
| H | -2.869242 | 3.647708  | 1.205328  |
| H | -1.747776 | 3.800225  | 2.568066  |
| H | 1.200219  | -3.722426 | -5.195285 |
| H | -0.026892 | -4.992150 | -5.340411 |
| H | -0.514467 | -3.309239 | -5.124787 |
| H | -1.381316 | -6.814229 | -0.051806 |
| H | -2.488722 | -6.491627 | -1.393737 |
| H | -2.453667 | -5.411181 | 0.004821  |
| C | -5.932921 | -0.051096 | 0.651162  |
| H | -5.676921 | 0.465113  | 1.563006  |
| H | -6.939543 | 0.121528  | 0.285382  |
| H | -4.974531 | -1.777614 | 3.089186  |

**TS-[4+2]-A4-S-1**

|   |           |           |           |
|---|-----------|-----------|-----------|
| P | 0.706613  | 0.303292  | -0.140294 |
| O | -0.443946 | 0.061059  | 0.793936  |
| O | 2.008989  | 0.531014  | 0.797727  |
| O | 1.121255  | -1.034004 | -0.961876 |
| C | 3.240067  | 0.415737  | 0.172567  |
| C | 3.727909  | -0.846225 | -0.091162 |
| C | 1.596702  | -2.086459 | -0.193284 |
| C | 2.893893  | -2.025957 | 0.272162  |
| C | 4.975104  | -0.966116 | -0.785556 |
| C | 7.439451  | -1.111108 | -2.152267 |
| C | 5.511358  | -2.218003 | -1.192783 |
| C | 5.690462  | 0.217875  | -1.121121 |
| C | 6.935060  | 0.111528  | -1.796866 |
| C | 6.710223  | -2.286622 | -1.855284 |
| H | 4.956000  | -3.124511 | -0.979776 |
| H | 7.473440  | 1.024650  | -2.035021 |
| H | 7.100973  | -3.251835 | -2.160540 |
| H | 8.389207  | -1.181826 | -2.672085 |
| C | 3.361477  | -3.067886 | 1.136072  |
| C | 4.201628  | -5.156491 | 2.834975  |
| C | 4.640823  | -3.035010 | 1.754357  |
| C | 2.497093  | -4.160992 | 1.423452  |
| C | 2.954026  | -5.204331 | 2.271778  |
| C | 5.048090  | -4.051818 | 2.579608  |
| H | 5.292621  | -2.187588 | 1.572269  |
| H | 2.286393  | -6.037817 | 2.471613  |
| H | 6.026829  | -4.006728 | 3.046020  |
| H | 4.539792  | -5.956350 | 3.485461  |
| C | 5.138157  | 1.484533  | -0.807257 |
| H | 5.692169  | 2.380154  | -1.076400 |
| C | 3.919487  | 1.611283  | -0.184963 |
| C | 1.190056  | -4.183993 | 0.876295  |
| H | 0.546141  | -5.032927 | 1.091164  |
| C | 0.712768  | -3.165842 | 0.085816  |
| O | 0.595503  | 1.380572  | -1.198473 |
| H | 0.194502  | 2.573533  | -0.965702 |

|   |           |           |           |
|---|-----------|-----------|-----------|
| C | 3.320567  | 2.946945  | 0.066360  |
| C | 2.813557  | 3.294823  | 1.320504  |
| C | 3.292199  | 3.888185  | -0.966776 |
| C | 2.317573  | 4.576597  | 1.558365  |
| C | 2.785978  | 5.169184  | -0.757845 |
| C | 2.324149  | 5.503075  | 0.515466  |
| H | 1.951949  | 6.510566  | 0.696759  |
| C | -0.673669 | -3.196143 | -0.448124 |
| C | -1.740856 | -3.505865 | 0.399991  |
| C | -0.926690 | -2.965485 | -1.803226 |
| C | -3.047069 | -3.584175 | -0.086657 |
| C | -2.219333 | -3.058163 | -2.315312 |
| C | -3.266448 | -3.370492 | -1.447573 |
| H | -4.282142 | -3.419762 | -1.838283 |
| N | -3.475244 | 2.502577  | 0.088119  |
| C | -2.258876 | 2.464528  | -0.471524 |
| N | -4.358164 | 3.044845  | 0.594909  |
| H | -1.885565 | 1.524085  | -0.839408 |
| C | -1.437399 | 3.596416  | -0.415316 |
| O | -0.208104 | 3.603168  | -0.752766 |
| O | -1.976837 | 4.717251  | 0.032949  |
| C | -1.090810 | 5.822491  | 0.234675  |
| H | -1.728119 | 6.646376  | 0.548860  |
| H | -0.358403 | 5.577856  | 1.006390  |
| H | -0.562946 | 6.066047  | -0.689148 |
| C | -3.970829 | -0.016204 | 1.377552  |
| C | -5.111290 | 0.747854  | 1.844903  |
| C | -5.286264 | 0.840839  | 3.273090  |
| C | -4.411134 | 0.282286  | 4.149991  |
| C | -3.260369 | -0.419404 | 3.679115  |
| C | -3.041052 | -0.539403 | 2.341476  |
| H | -6.148902 | 1.392610  | 3.634785  |
| H | -4.583886 | 0.371206  | 5.218112  |
| H | -2.572200 | -0.869088 | 4.386038  |
| H | -2.181191 | -1.096133 | 1.983338  |
| C | -3.697351 | -0.268250 | 0.012204  |
| C | -5.885783 | 1.565735  | 1.033337  |
| H | -6.668792 | 2.159041  | 1.493053  |
| H | -5.953170 | 1.439567  | -0.037468 |
| O | -2.498528 | -0.523406 | -0.424382 |
| H | -1.685850 | -0.295211 | 0.197995  |
| C | -4.720400 | -0.489656 | -1.039624 |
| C | -5.932782 | -1.118465 | -0.731439 |
| C | -4.393925 | -0.233396 | -2.373223 |
| C | -6.808479 | -1.476103 | -1.747731 |
| H | -6.171485 | -1.334473 | 0.305558  |
| C | -5.280325 | -0.579532 | -3.388244 |
| H | -3.435871 | 0.222283  | -2.602875 |
| C | -6.484932 | -1.205610 | -3.078332 |
| H | -7.741231 | -1.974535 | -1.505121 |
| H | -5.022856 | -0.373610 | -4.422253 |
| H | -7.170734 | -1.487070 | -3.870963 |
| H | 3.651166  | 3.602885  | -1.952536 |
| H | 2.820604  | 2.562038  | 2.122263  |
| H | -0.101465 | -2.716984 | -2.464867 |
| H | -1.549388 | -3.665034 | 1.459484  |
| C | 2.694836  | 6.153704  | -1.894854 |
| C | 1.775268  | 4.940146  | 2.917953  |

|   |           |           |           |
|---|-----------|-----------|-----------|
| C | -2.475349 | -2.803859 | -3.778888 |
| C | -4.196675 | -3.849664 | 0.852398  |
| H | 1.556869  | 6.008999  | 2.986133  |
| H | 2.487585  | 4.689616  | 3.708825  |
| H | 0.851840  | 4.390391  | 3.129000  |
| H | 1.782700  | 5.979569  | -2.476154 |
| H | 3.541756  | 6.054993  | -2.578369 |
| H | 2.667672  | 7.183238  | -1.529207 |
| H | -3.523658 | -2.978962 | -4.031888 |
| H | -1.854888 | -3.449662 | -4.407340 |
| H | -2.235816 | -1.767341 | -4.039045 |
| H | -5.131980 | -3.976500 | 0.301514  |
| H | -4.025597 | -4.750310 | 1.449528  |
| H | -4.325332 | -3.014267 | 1.551181  |

**TS-[4+2]-A4-S-2**

|   |           |           |           |
|---|-----------|-----------|-----------|
| P | 0.691202  | 0.201883  | 1.147214  |
| O | -0.205690 | 1.315326  | 0.732504  |
| O | 0.843703  | -0.793921 | -0.125268 |
| O | 2.210804  | 0.652512  | 1.422708  |
| C | 1.902983  | -1.690828 | -0.121867 |
| C | 3.176545  | -1.212385 | -0.356770 |
| C | 2.865919  | 1.148635  | 0.299275  |
| C | 3.369024  | 0.243590  | -0.609278 |
| C | 4.275964  | -2.127427 | -0.288598 |
| C | 6.381627  | -3.999406 | -0.148269 |
| C | 5.630856  | -1.710570 | -0.395777 |
| C | 4.007370  | -3.506642 | -0.067484 |
| C | 5.087647  | -4.427543 | -0.016294 |
| C | 6.652955  | -2.622205 | -0.328068 |
| H | 5.850750  | -0.656512 | -0.523595 |
| H | 4.863685  | -5.478853 | 0.141218  |
| H | 7.680926  | -2.283887 | -0.407211 |
| H | 7.200825  | -4.709346 | -0.102748 |
| C | 3.986394  | 0.746808  | -1.800732 |
| C | 5.189559  | 1.823607  | -4.113975 |
| C | 4.443344  | -0.099912 | -2.846877 |
| C | 4.109779  | 2.155260  | -1.966220 |
| C | 4.733634  | 2.666266  | -3.135414 |
| C | 5.029490  | 0.425280  | -3.970011 |
| H | 4.316770  | -1.172465 | -2.751734 |
| H | 4.830805  | 3.743170  | -3.240497 |
| H | 5.368992  | -0.237704 | -4.759071 |
| H | 5.660835  | 2.224063  | -5.005465 |
| C | 2.672207  | -3.937155 | 0.124565  |
| H | 2.481951  | -4.995090 | 0.284259  |
| C | 1.612371  | -3.060239 | 0.126213  |
| C | 3.575484  | 3.028439  | -0.985990 |
| H | 3.661104  | 4.101566  | -1.135697 |
| C | 2.932718  | 2.558334  | 0.133968  |
| O | 0.358080  | -0.622159 | 2.399410  |
| H | -0.581453 | -1.148919 | 2.474817  |
| C | 0.236025  | -3.547455 | 0.407840  |
| C | -0.860666 | -3.183904 | -0.384617 |
| C | 0.044574  | -4.441027 | 1.463781  |
| C | -2.121783 | -3.729027 | -0.149108 |
| C | -1.211673 | -4.987079 | 1.729361  |
| C | -2.278872 | -4.630076 | 0.909011  |

|   |           |           |           |
|---|-----------|-----------|-----------|
| C | 2.270575  | 3.479027  | 1.092558  |
| C | 1.424910  | 4.473519  | 0.602501  |
| C | 2.464908  | 3.364524  | 2.473382  |
| C | 0.768720  | 5.351382  | 1.467839  |
| C | 1.832846  | 4.236082  | 3.355217  |
| C | 0.985976  | 5.220904  | 2.837057  |
| N | -3.946215 | -0.472321 | 0.269273  |
| C | -2.797532 | -0.760541 | 0.871553  |
| N | -5.104740 | -0.548510 | 0.204387  |
| H | -1.884072 | -0.434524 | 0.404898  |
| C | -2.761752 | -1.596412 | 2.018203  |
| O | -1.732887 | -1.842816 | 2.679053  |
| O | -3.930329 | -2.131725 | 2.371656  |
| C | -3.907987 | -2.946488 | 3.543534  |
| H | -4.933122 | -3.284963 | 3.681981  |
| H | -3.573206 | -2.365893 | 4.405223  |
| H | -3.234210 | -3.793686 | 3.398966  |
| C | -3.551326 | 0.312892  | -2.430373 |
| C | -4.990001 | 0.157728  | -2.399346 |
| C | -5.563273 | -0.761663 | -3.350943 |
| C | -4.810911 | -1.445115 | -4.252460 |
| C | -3.391098 | -1.289076 | -4.271582 |
| C | -2.789782 | -0.461982 | -3.375910 |
| H | -6.641092 | -0.892523 | -3.327025 |
| H | -5.287529 | -2.114858 | -4.961249 |
| H | -2.797585 | -1.827958 | -5.002208 |
| H | -1.713501 | -0.335504 | -3.377163 |
| C | -2.819229 | 1.088697  | -1.507619 |
| C | -5.809667 | 0.631055  | -1.380079 |
| H | -6.855872 | 0.345108  | -1.395841 |
| H | -5.572160 | 1.496595  | -0.780749 |
| O | -1.541005 | 0.788107  | -1.383337 |
| H | -1.045641 | 1.245918  | -0.640046 |
| C | -3.283881 | 2.349301  | -0.871506 |
| C | -3.986201 | 3.273819  | -1.656731 |
| C | -2.923569 | 2.686281  | 0.436949  |
| C | -4.337864 | 4.510502  | -1.133866 |
| H | -4.253934 | 3.008900  | -2.675155 |
| C | -3.283661 | 3.926762  | 0.956482  |
| H | -2.362949 | 1.985649  | 1.046559  |
| C | -3.988683 | 4.838761  | 0.176253  |
| H | -4.877605 | 5.222240  | -1.749655 |
| H | -3.001018 | 4.180129  | 1.973070  |
| H | -4.262217 | 5.806485  | 0.584830  |
| H | 0.886217  | -4.693915 | 2.104095  |
| H | -0.731005 | -2.468651 | -1.192887 |
| H | -3.265305 | -5.050167 | 1.101378  |
| H | 3.114979  | 2.584864  | 2.859352  |
| H | 1.245451  | 4.538274  | -0.468075 |
| H | 0.478830  | 5.897297  | 3.522716  |
| C | 2.070643  | 4.137352  | 4.840716  |
| C | -0.177306 | 6.390088  | 0.920546  |
| C | -1.402035 | -5.914412 | 2.902736  |
| C | -3.307727 | -3.355578 | -1.001237 |
| H | -1.269588 | -5.374988 | 3.846762  |
| H | -0.671936 | -6.728645 | 2.888725  |
| H | -2.401779 | -6.356070 | 2.901451  |
| H | -3.574482 | -4.170877 | -1.682225 |

|   |           |           |           |
|---|-----------|-----------|-----------|
| H | -4.182024 | -3.145694 | -0.376490 |
| H | -3.101475 | -2.468516 | -1.605666 |
| H | 2.427520  | 3.143089  | 5.117710  |
| H | 2.822001  | 4.864677  | 5.165670  |
| H | 1.154277  | 4.339891  | 5.401139  |
| H | 0.295797  | 6.976805  | 0.127856  |
| H | -0.503969 | 7.078891  | 1.703145  |
| H | -1.067136 | 5.917107  | 0.491733  |

**TS-[4+2]-B2-R**

|   |           |           |           |
|---|-----------|-----------|-----------|
| P | -0.687682 | 1.299459  | -0.168978 |
| O | 0.366400  | 0.757478  | 0.749631  |
| O | -1.890599 | 1.763597  | 0.834628  |
| O | -0.223966 | 2.714345  | -0.835682 |
| C | -3.027484 | 2.297273  | 0.256915  |
| C | -3.056448 | 3.662921  | 0.011667  |
| C | 0.270410  | 3.655960  | 0.055577  |
| C | -0.613184 | 4.534792  | 0.666048  |
| C | -4.134675 | 4.223338  | -0.676182 |
| C | -5.232303 | 3.443550  | -1.011484 |
| C | -0.144784 | 5.405953  | 1.655457  |
| C | 1.201309  | 5.447708  | 1.987176  |
| C | -5.221811 | 2.091519  | -0.689422 |
| H | -6.099629 | 1.496383  | -0.915186 |
| C | -4.113409 | 1.472639  | -0.091112 |
| C | 2.080849  | 4.589434  | 1.335617  |
| H | 3.139800  | 4.617680  | 1.573763  |
| C | 1.636100  | 3.668855  | 0.380070  |
| O | -1.230279 | 0.498760  | -1.318137 |
| H | -1.732880 | -0.743531 | -1.588629 |
| C | -4.122055 | 0.000940  | 0.131602  |
| C | -3.359959 | -0.625564 | 1.134590  |
| C | -4.940168 | -0.813226 | -0.657751 |
| C | -3.425899 | -1.999808 | 1.316869  |
| C | -5.032832 | -2.183401 | -0.429523 |
| C | -4.273388 | -2.798135 | 0.552527  |
| H | -4.336917 | -3.867230 | 0.724715  |
| C | 2.611287  | 2.735083  | -0.235936 |
| C | 3.576248  | 2.117373  | 0.567008  |
| C | 2.624777  | 2.489642  | -1.613111 |
| C | 4.549041  | 1.305527  | -0.002000 |
| C | 3.610176  | 1.680520  | -2.167436 |
| C | 4.588571  | 1.093472  | -1.374001 |
| H | 5.344474  | 0.448468  | -1.812433 |
| N | 0.583336  | -3.361675 | -0.145168 |
| C | -0.148099 | -2.366390 | -0.681089 |
| N | 0.715554  | -4.456995 | 0.186933  |
| H | 0.289744  | -1.385430 | -0.750304 |
| C | -1.386310 | -2.636304 | -1.251424 |
| O | -2.115331 | -1.722708 | -1.786768 |
| O | -1.815849 | -3.883183 | -1.259151 |
| C | -2.900250 | -4.240507 | -2.126815 |
| H | -2.478252 | -4.693099 | -3.026386 |
| H | -3.502378 | -4.970980 | -1.589427 |
| H | -3.497913 | -3.370505 | -2.389001 |
| C | 3.250714  | -2.683754 | -0.345719 |
| C | 3.414835  | -4.068935 | 0.044412  |
| C | 4.167812  | -4.909243 | -0.857116 |

|   |           |           |           |
|---|-----------|-----------|-----------|
| C | 4.662823  | -4.452954 | -2.036450 |
| C | 4.418585  | -3.105884 | -2.449828 |
| C | 3.720697  | -2.268099 | -1.640190 |
| H | 4.322326  | -5.942557 | -0.560874 |
| H | 5.231549  | -5.117264 | -2.679551 |
| H | 4.789568  | -2.752961 | -3.406391 |
| H | 3.516239  | -1.250688 | -1.946812 |
| C | 2.563053  | -1.723915 | 0.422928  |
| C | 2.705859  | -4.683905 | 1.066887  |
| H | 2.801481  | -5.759021 | 1.178994  |
| H | 2.290210  | -4.158582 | 1.913188  |
| O | 2.184139  | -0.624185 | -0.181489 |
| H | 1.528807  | -0.012921 | 0.337647  |
| C | 2.406284  | -1.783239 | 1.900842  |
| C | 3.556606  | -1.964333 | 2.678457  |
| C | 1.163645  | -1.620309 | 2.518730  |
| C | 3.458707  | -1.996934 | 4.063426  |
| H | 4.516937  | -2.079261 | 2.187461  |
| C | 1.071560  | -1.675008 | 3.906406  |
| H | 0.273772  | -1.460741 | 1.918715  |
| C | 2.214906  | -1.862613 | 4.677939  |
| H | 4.352924  | -2.130883 | 4.663076  |
| H | 0.101488  | -1.574243 | 4.379032  |
| H | 2.137733  | -1.901209 | 5.759833  |
| H | -6.089576 | 3.876077  | -1.517774 |
| H | 1.564160  | 6.127692  | 2.751621  |
| C | -2.097503 | 4.759846  | 0.438787  |
| C | -3.877983 | 5.685462  | -0.957151 |
| C | -2.369710 | 5.814666  | -0.669942 |
| C | -2.506985 | 5.338919  | 1.824602  |
| C | -1.292917 | 6.172913  | 2.267153  |
| H | -2.065998 | 6.820781  | -0.367878 |
| H | -1.798020 | 5.537707  | -1.561575 |
| H | -4.469731 | 6.322697  | -0.288926 |
| H | -4.140867 | 5.961869  | -1.981673 |
| H | -3.439284 | 5.908335  | 1.776025  |
| H | -2.651902 | 4.504616  | 2.518665  |
| H | -1.340514 | 7.192370  | 1.864980  |
| H | -1.206371 | 6.257287  | 3.353538  |
| H | -5.507191 | -0.387676 | -1.478543 |
| H | -2.717647 | -0.041247 | 1.779650  |
| H | 1.869264  | 2.934244  | -2.250784 |
| H | 3.545114  | 2.246771  | 1.643679  |
| C | -5.997259 | -2.975131 | -1.265636 |
| F | -5.879052 | -4.296077 | -1.061057 |
| F | -5.804017 | -2.754533 | -2.578250 |
| F | -7.267185 | -2.641070 | -1.003786 |
| C | -2.565871 | -2.672677 | 2.349550  |
| F | -1.577086 | -3.381815 | 1.779874  |
| F | -3.274100 | -3.530797 | 3.095806  |
| F | -1.992336 | -1.788353 | 3.180310  |
| C | 3.663231  | 1.440525  | -3.649650 |
| F | 3.831203  | 0.132990  | -3.923420 |
| F | 4.697388  | 2.082363  | -4.214166 |
| F | 2.551678  | 1.844948  | -4.270680 |
| C | 5.566318  | 0.604379  | 0.850515  |
| F | 6.800417  | 1.091698  | 0.656813  |
| F | 5.619818  | -0.706899 | 0.549110  |

|                      |           |           |           |   |           |           |           |
|----------------------|-----------|-----------|-----------|---|-----------|-----------|-----------|
| F                    | 5.294121  | 0.704804  | 2.157101  | H | 2.677035  | 0.239544  | -5.137655 |
| <b>TS-[4+2]-B1-S</b> |           |           |           | H | 2.984351  | -1.495420 | -4.906175 |
| P                    | -1.222641 | -0.115976 | -0.669009 | C | 3.538088  | 0.321588  | 2.177496  |
| O                    | -0.462709 | 1.050484  | -0.131544 | C | 4.942147  | 0.569390  | 1.920805  |
| O                    | -1.121213 | -1.289062 | 0.444539  | C | 5.880949  | -0.343137 | 2.528949  |
| O                    | -2.802190 | 0.159846  | -0.817415 | C | 5.494125  | -1.357690 | 3.345367  |
| C                    | -1.690146 | -2.518499 | 0.117894  | C | 4.107602  | -1.574741 | 3.615913  |
| C                    | -3.049948 | -2.708433 | 0.317591  | C | 3.174106  | -0.781942 | 3.026093  |
| C                    | -3.452183 | 0.590233  | 0.339687  | H | 6.934493  | -0.180301 | 2.321429  |
| C                    | -3.976591 | -0.363558 | 1.199814  | H | 6.238773  | -2.003238 | 3.800300  |
| C                    | -3.652256 | -3.877585 | -0.156606 | H | 3.804539  | -2.368779 | 4.290693  |
| C                    | -2.886717 | -4.886109 | -0.724972 | H | 2.119209  | -0.937974 | 3.216689  |
| C                    | -4.550474 | 0.047456  | 2.406508  | C | 2.479377  | 1.024995  | 1.564277  |
| C                    | -4.664976 | 1.396154  | 2.712957  | C | 5.429683  | 1.460603  | 0.974156  |
| C                    | -1.509298 | -4.709769 | -0.830934 | H | 6.496289  | 1.459471  | 0.776581  |
| H                    | -0.891147 | -5.498574 | -1.248959 | H | 4.897687  | 2.345092  | 0.660041  |
| C                    | -0.884588 | -3.520477 | -0.438119 | O | 1.308812  | 0.423726  | 1.542665  |
| C                    | -4.169441 | 2.336227  | 1.813806  | H | 0.592492  | 0.857032  | 0.967488  |
| H                    | -4.249781 | 3.396391  | 2.034947  | C | 2.519753  | 2.460819  | 1.172376  |
| C                    | -3.531471 | 1.958834  | 0.626353  | C | 3.068509  | 3.374345  | 2.082907  |
| O                    | -0.867841 | -0.693581 | -2.043443 | C | 1.944067  | 2.929700  | -0.012657 |
| H                    | 0.119964  | -0.626463 | -2.510779 | C | 3.063938  | 4.733836  | 1.800283  |
| C                    | 0.589316  | -3.353293 | -0.599620 | H | 3.504794  | 3.004399  | 3.005884  |
| C                    | 1.406232  | -3.187728 | 0.534967  | C | 1.968876  | 4.291273  | -0.302741 |
| C                    | 1.171884  | -3.433975 | -1.879381 | H | 1.482560  | 2.236908  | -0.707136 |
| C                    | 2.788497  | -3.083186 | 0.369166  | C | 2.523253  | 5.194337  | 0.599634  |
| C                    | 2.557972  | -3.339550 | -1.996359 | H | 3.485372  | 5.434104  | 2.513830  |
| C                    | 3.381648  | -3.145526 | -0.888541 | H | 1.537095  | 4.642364  | -1.234341 |
| C                    | -2.954199 | 2.999745  | -0.272591 | H | 2.531630  | 6.255689  | 0.372018  |
| C                    | -1.901164 | 3.809373  | 0.187240  | H | 3.003628  | -3.376080 | -2.990104 |
| C                    | -3.497268 | 3.204457  | -1.553104 | H | 3.413495  | -2.928936 | 1.245882  |
| C                    | -1.418457 | 4.820193  | -0.643770 | H | -3.401081 | 4.378416  | -3.343968 |
| C                    | -2.976072 | 4.218794  | -2.355052 | H | -0.611392 | 5.451971  | -0.279023 |
| C                    | -1.936118 | 5.037389  | -1.918218 | C | 0.335371  | -3.587463 | -3.127095 |
| C                    | -4.073925 | -1.871370 | 1.062345  | H | 0.890328  | -3.224497 | -3.995050 |
| H                    | -3.351411 | -5.799276 | -1.084645 | H | 0.069283  | -4.634015 | -3.309367 |
| H                    | -5.118211 | 1.715791  | 3.646550  | H | -0.592771 | -3.015975 | -3.053406 |
| C                    | -5.376374 | -2.316009 | 0.340847  | C | 4.864694  | -2.941422 | -1.062078 |
| H                    | -5.464157 | -1.753897 | -0.594833 | H | 5.357891  | -3.853980 | -1.412450 |
| H                    | -6.269408 | -2.121264 | 0.941544  | H | 5.054707  | -2.155028 | -1.800279 |
| C                    | -5.150848 | -3.808924 | 0.033747  | H | 5.331405  | -2.636624 | -0.121745 |
| H                    | -5.696957 | -4.146586 | -0.851206 | C | 0.820901  | -3.128206 | 1.923514  |
| H                    | -5.470675 | -4.441474 | 0.870828  | H | 0.387028  | -2.140731 | 2.113938  |
| C                    | -4.138061 | -2.282134 | 2.562597  | H | 0.029131  | -3.871257 | 2.055263  |
| H                    | -3.117241 | -2.300548 | 2.959274  | H | 1.597420  | -3.312662 | 2.669706  |
| H                    | -4.574841 | -3.275099 | 2.700826  | C | -4.639348 | 2.359969  | -2.060317 |
| C                    | -4.935840 | -1.153396 | 3.238580  | H | -4.299424 | 1.347768  | -2.299720 |
| H                    | -6.015501 | -1.339389 | 3.182178  | H | -5.430043 | 2.271270  | -1.309474 |
| H                    | -4.684402 | -1.027918 | 4.295102  | H | -5.070140 | 2.797801  | -2.963345 |
| N                    | 3.581655  | 0.265501  | -0.685435 | C | -1.370756 | 6.110550  | -2.813419 |
| C                    | 2.426155  | -0.140298 | -1.209696 | H | -0.684264 | 5.682600  | -3.551995 |
| N                    | 4.697412  | 0.559155  | -0.802865 | H | -2.161741 | 6.625488  | -3.365220 |
| H                    | 1.606627  | -0.351519 | -0.542176 | H | -0.816968 | 6.855695  | -2.236754 |
| C                    | 2.322979  | -0.368688 | -2.599507 | C | -1.271331 | 3.608262  | 1.544356  |
| O                    | 1.253010  | -0.617683 | -3.200862 | H | -0.292077 | 4.094095  | 1.582218  |
| O                    | 3.463081  | -0.287134 | -3.286314 | H | -1.886638 | 4.031310  | 2.345364  |
| C                    | 3.356770  | -0.490510 | -4.695089 | H | -1.138019 | 2.544523  | 1.755182  |
| H                    | 4.365348  | -0.365341 | -5.083870 |   |           |           |           |

**TS-[4+2]-B2-R**

|   |           |           |           |
|---|-----------|-----------|-----------|
| H | -0.934045 | -0.651980 | -2.553107 |
| P | -1.016392 | 1.052343  | -0.216873 |
| O | -1.102773 | 0.161339  | -1.415844 |
| O | -0.014580 | 0.792939  | 0.870272  |
| H | -4.109740 | 5.660875  | 2.519258  |
| H | -4.043258 | 6.452366  | 0.944587  |
| H | -1.379069 | 6.354848  | 2.789557  |
| C | -3.825527 | 5.516289  | 1.473750  |
| C | -1.269136 | 5.595907  | 2.021205  |
| H | -5.539109 | 4.562948  | 0.437162  |
| C | -4.541872 | 4.323706  | 0.817186  |
| C | -2.371958 | 5.138300  | 1.313129  |
| H | -4.640194 | 3.512322  | 1.545663  |
| C | -0.018043 | 5.051888  | 1.744905  |
| H | 0.858648  | 5.398656  | 2.284035  |
| H | -4.002929 | 5.737107  | -1.399635 |
| H | -5.995156 | 4.385886  | -1.883852 |
| C | -2.235431 | 4.154434  | 0.329441  |
| C | -3.578063 | 3.856562  | -0.313610 |
| C | -3.838141 | 4.675953  | -1.607583 |
| C | -5.049358 | 3.981377  | -2.264438 |
| C | 0.144468  | 4.049595  | 0.783090  |
| C | -0.985020 | 3.604041  | 0.083770  |
| C | -3.945834 | 2.466414  | -0.792540 |
| C | -4.870487 | 2.540459  | -1.838844 |
| H | -2.963137 | 4.585398  | -2.259294 |
| O | -2.465730 | 1.127150  | 0.537163  |
| H | -5.064454 | 4.095279  | -3.351549 |
| C | -3.537595 | 1.225318  | -0.334982 |
| C | -5.438883 | 1.388197  | -2.365846 |
| O | -0.870555 | 2.564186  | -0.823254 |
| C | -4.121019 | 0.049751  | -0.825265 |
| H | -6.151119 | 1.445669  | -3.183172 |
| C | -5.077653 | 0.148458  | -1.836862 |
| H | -5.527465 | -0.762104 | -2.221789 |
| C | 1.492511  | 3.480584  | 0.530366  |
| C | 2.043550  | 3.481170  | -0.753095 |
| C | 2.246379  | 2.971613  | 1.590625  |
| C | 3.345932  | 3.035369  | -0.953158 |
| C | 3.538104  | 2.508420  | 1.370937  |
| C | 4.110711  | 2.562010  | 0.106452  |
| H | 5.124828  | 2.210367  | -0.053716 |
| C | -3.702926 | -1.257206 | -0.255439 |
| C | -3.858793 | -1.493651 | 1.110682  |
| C | -3.138905 | -2.256052 | -1.054092 |
| C | -3.488689 | -2.716603 | 1.662329  |
| C | -2.751569 | -3.464607 | -0.485282 |
| C | -2.931562 | -3.712870 | 0.872646  |
| H | -2.635614 | -4.662532 | 1.305109  |
| N | 1.739837  | -2.961060 | -1.347519 |
| C | 0.891282  | -2.021160 | -1.798051 |
| N | 2.179150  | -4.028753 | -1.349792 |
| H | 0.880372  | -1.063627 | -1.305904 |
| C | 0.076540  | -2.248728 | -2.896547 |
| O | -0.809521 | -1.388749 | -3.286545 |
| O | 0.215559  | -3.353748 | -3.594837 |
| C | -0.545249 | -3.476485 | -4.803000 |

|   |           |           |           |
|---|-----------|-----------|-----------|
| H | -0.373106 | -4.494769 | -5.143599 |
| H | -1.603335 | -3.308887 | -4.610236 |
| H | -0.183419 | -2.757836 | -5.540693 |
| C | 3.841919  | -1.693532 | -0.094781 |
| C | 4.338677  | -3.052401 | -0.068026 |
| C | 5.615647  | -3.287184 | -0.696575 |
| C | 6.297586  | -2.310067 | -1.350102 |
| C | 5.743248  | -0.998707 | -1.466226 |
| C | 4.553316  | -0.717376 | -0.873182 |
| H | 6.016508  | -4.295252 | -0.646907 |
| H | 7.257684  | -2.530610 | -1.806119 |
| H | 6.268260  | -0.229744 | -2.022977 |
| H | 4.113228  | 0.266174  | -0.961813 |
| C | 2.649637  | -1.259589 | 0.528856  |
| C | 3.571115  | -4.160597 | 0.275199  |
| H | 4.009572  | -5.144544 | 0.144686  |
| H | 2.712774  | -4.112986 | 0.928730  |
| O | 2.147990  | -0.118282 | 0.142433  |
| H | 1.258451  | 0.217717  | 0.586077  |
| C | 2.013102  | -1.925372 | 1.693679  |
| C | 2.811584  | -2.251064 | 2.796352  |
| C | 0.636568  | -2.166436 | 1.730345  |
| C | 2.239381  | -2.829375 | 3.921143  |
| H | 3.876370  | -2.045423 | 2.757986  |
| C | 0.074128  | -2.759261 | 2.856755  |
| H | 0.011667  | -1.906555 | 0.878973  |
| C | 0.870355  | -3.090292 | 3.949003  |
| H | 2.859913  | -3.074283 | 4.776679  |
| H | -0.989645 | -2.959233 | 2.887121  |
| H | 0.420515  | -3.546217 | 4.825043  |
| H | 1.457229  | 3.840155  | -1.592298 |
| H | 1.808710  | 2.915817  | 2.581951  |
| H | -4.270445 | -0.715896 | 1.746554  |
| H | -2.976282 | -2.070463 | -2.111112 |
| C | -2.070782 | -4.517888 | -1.309924 |
| F | -2.506239 | -5.746389 | -1.003075 |
| F | -0.743060 | -4.516463 | -1.115194 |
| F | -2.277549 | -4.332414 | -2.625463 |
| C | -3.747165 | -2.957178 | 3.123276  |
| F | -3.069428 | -4.024634 | 3.578319  |
| F | -5.045966 | -3.177962 | 3.366557  |
| F | -3.381398 | -1.903898 | 3.864702  |
| C | 3.968890  | 3.110015  | -2.317790 |
| F | 4.792829  | 2.068298  | -2.536191 |
| F | 4.706711  | 4.220443  | -2.466477 |
| F | 3.050580  | 3.111027  | -3.290204 |
| C | 4.300041  | 1.841786  | 2.478458  |
| F | 3.884001  | 2.236956  | 3.687808  |
| F | 5.614770  | 2.088735  | 2.396622  |
| F | 4.153258  | 0.504375  | 2.426787  |

**TS-[4+2]-B2-S**

|   |           |           |           |
|---|-----------|-----------|-----------|
| H | -1.362071 | -1.051773 | -2.013381 |
| P | -1.213954 | 0.995503  | -0.095912 |
| O | -1.504266 | 0.084881  | -1.246847 |
| O | -0.145840 | 0.669269  | 0.909274  |
| H | -3.396745 | 5.958607  | 2.858206  |
| H | -3.526212 | 6.696164  | 1.261779  |

|   |           |           |           |                      |           |           |           |
|---|-----------|-----------|-----------|----------------------|-----------|-----------|-----------|
| H | -0.622947 | 6.452845  | 2.632999  | C                    | 1.006353  | -2.217547 | 3.649406  |
| C | -3.301963 | 5.759796  | 1.787541  | C                    | 1.464769  | -1.455423 | 2.621545  |
| C | -0.696555 | 5.649279  | 1.906825  | H                    | 2.720830  | -5.097994 | 3.037497  |
| H | -5.233245 | 4.930584  | 1.081111  | H                    | 1.089316  | -4.170579 | 4.608571  |
| C | -4.210148 | 4.616757  | 1.306158  | H                    | 0.292584  | -1.810243 | 4.355818  |
| C | -1.930518 | 5.250363  | 1.413594  | H                    | 1.126449  | -0.429774 | 2.527335  |
| H | -4.253413 | 3.835970  | 2.072478  | C                    | 2.767068  | -1.115625 | 0.591648  |
| C | 0.447509  | 4.992070  | 1.467523  | C                    | 3.638405  | -4.014179 | 0.859944  |
| H | 1.423380  | 5.298605  | 1.831977  | H                    | 3.817104  | -5.070854 | 1.029707  |
| H | -3.870334 | 5.949140  | -0.996861 | H                    | 4.279287  | -3.545472 | 0.130853  |
| H | -6.049565 | 4.821608  | -1.120210 | O                    | 2.076193  | -0.075877 | 0.234389  |
| C | -2.032145 | 4.217062  | 0.475804  | H                    | 1.129191  | 0.150017  | 0.621189  |
| C | -3.483807 | 4.040099  | 0.055996  | C                    | 4.010361  | -1.195417 | -0.216302 |
| C | -3.857881 | 4.874743  | -1.201064 | C                    | 3.923725  | -1.025359 | -1.599910 |
| C | -5.226969 | 4.314601  | -1.639022 | C                    | 5.259027  | -1.261355 | 0.406309  |
| C | 0.378136  | 3.927248  | 0.562058  | C                    | 5.081793  | -0.945999 | -2.364546 |
| C | -0.881885 | 3.546150  | 0.076594  | H                    | 2.944923  | -0.930321 | -2.059146 |
| C | -4.066395 | 2.695678  | -0.330851 | C                    | 6.415431  | -1.162113 | -0.359967 |
| C | -5.133171 | 2.864983  | -1.217935 | H                    | 5.313209  | -1.367886 | 1.485035  |
| H | -3.114136 | 4.682516  | -1.981094 | C                    | 6.328353  | -1.009733 | -1.743439 |
| O | -2.551303 | 1.240837  | 0.804085  | H                    | 5.009551  | -0.805447 | -3.437630 |
| H | -5.406163 | 4.424565  | -2.711765 | H                    | 7.385653  | -1.192035 | 0.124558  |
| C | -3.714897 | 1.420573  | 0.075082  | H                    | 7.233679  | -0.931239 | -2.336756 |
| C | -5.893141 | 1.776007  | -1.624585 | H                    | 1.228163  | 3.247697  | -1.954883 |
| O | -0.987456 | 2.460930  | -0.778897 | H                    | 2.331159  | 3.040486  | 2.185636  |
| C | -4.459617 | 0.301181  | -0.323434 | H                    | -3.641282 | -0.568878 | 2.129398  |
| H | -6.724573 | 1.905481  | -2.310534 | H                    | -4.193901 | -1.853054 | -1.929451 |
| C | -5.561235 | 0.504381  | -1.159406 | C                    | -3.282241 | -4.391621 | -1.597057 |
| H | -6.148071 | -0.356171 | -1.467399 | F                    | -4.000961 | -5.477471 | -1.282612 |
| C | 1.629434  | 3.234651  | 0.161437  | F                    | -2.003016 | -4.799739 | -1.707955 |
| C | 1.940544  | 2.985816  | -1.179016 | F                    | -3.673585 | -3.988342 | -2.815120 |
| C | 2.565407  | 2.885231  | 1.136472  | C                    | -2.690035 | -2.888736 | 3.111360  |
| C | 3.171755  | 2.436760  | -1.523573 | F                    | -1.709914 | -3.800822 | 3.171968  |
| C | 3.784231  | 2.320184  | 0.778065  | F                    | -3.721260 | -3.374191 | 3.821120  |
| C | 4.109524  | 2.098358  | -0.553305 | F                    | -2.264281 | -1.787379 | 3.745203  |
| H | 5.060501  | 1.653023  | -0.828130 | C                    | 3.468954  | 2.198817  | -2.977116 |
| C | -4.010129 | -1.057879 | 0.064270  | F                    | 4.777840  | 2.018997  | -3.202064 |
| C | -3.598331 | -1.340756 | 1.369505  | F                    | 3.066105  | 3.229543  | -3.735062 |
| C | -3.921205 | -2.064431 | -0.900969 | F                    | 2.835532  | 1.109850  | -3.451051 |
| C | -3.091872 | -2.595412 | 1.692359  | C                    | 4.694131  | 1.857357  | 1.876686  |
| C | -3.418159 | -3.313937 | -0.563297 | F                    | 4.802082  | 2.771350  | 2.852551  |
| C | -2.991152 | -3.592943 | 0.731413  | F                    | 5.929206  | 1.581271  | 1.440511  |
| H | -2.572210 | -4.562115 | 0.981747  | F                    | 4.215387  | 0.737403  | 2.454889  |
| N | 1.485177  | -3.108977 | -0.618639 |                      |           |           |           |
| C | 0.454338  | -2.333941 | -1.003361 |                      |           |           |           |
| N | 2.130670  | -4.062315 | -0.686460 |                      |           |           |           |
| H | 0.189973  | -1.491603 | -0.384911 |                      |           |           |           |
| C | -0.221502 | -2.611869 | -2.185755 |                      |           |           |           |
| O | -1.213785 | -1.909695 | -2.614116 |                      |           |           |           |
| O | 0.182475  | -3.624880 | -2.921473 |                      |           |           |           |
| C | -0.501469 | -3.851333 | -4.160798 |                      |           |           |           |
| H | -0.027834 | -4.733038 | -4.586276 |                      |           |           |           |
| H | -1.560606 | -4.029569 | -3.979989 |                      |           |           |           |
| H | -0.377012 | -2.990448 | -4.819648 |                      |           |           |           |
| C | 2.422369  | -1.961032 | 1.673354  |                      |           |           |           |
| C | 2.916513  | -3.317504 | 1.822906  |                      |           |           |           |
| C | 2.376419  | -4.074164 | 2.924765  |                      |           |           |           |
| C | 1.468105  | -3.559878 | 3.795059  |                      |           |           |           |
|   |           |           |           | <b>TS-[4+2]-B3-R</b> |           |           |           |
|   |           |           |           | H                    | -0.133763 | -0.642942 | 2.722100  |
|   |           |           |           | P                    | 1.157419  | 0.223295  | 0.501792  |
|   |           |           |           | O                    | 0.843791  | -0.495327 | 1.784086  |
|   |           |           |           | O                    | 0.088430  | 0.795624  | -0.370266 |
|   |           |           |           | H                    | 5.877070  | 1.389583  | -3.346980 |
|   |           |           |           | H                    | 6.729634  | 1.899983  | -1.889977 |
|   |           |           |           | H                    | 4.471268  | 3.840929  | -3.174819 |
|   |           |           |           | C                    | 5.806482  | 1.434215  | -2.256955 |
|   |           |           |           | C                    | 4.021765  | 3.344448  | -2.320182 |
|   |           |           |           | H                    | 6.501794  | -0.517019 | -1.463347 |
|   |           |           |           | C                    | 5.582693  | 0.056558  | -1.612584 |
|   |           |           |           | C                    | 4.593492  | 2.199133  | -1.783630 |
|   |           |           |           | H                    | 4.910081  | -0.535073 | -2.243118 |

|   |           |           |           |
|---|-----------|-----------|-----------|
| C | 2.843463  | 3.832890  | -1.763247 |
| H | 2.369242  | 4.717399  | -2.178093 |
| H | 6.692662  | 1.338979  | 0.473922  |
| H | 7.255017  | -1.038172 | 0.684641  |
| C | 4.014872  | 1.558215  | -0.684842 |
| C | 4.852553  | 0.360433  | -0.269188 |
| C | 5.897150  | 0.680210  | 0.834233  |
| C | 6.404471  | -0.704220 | 1.291202  |
| C | 2.214297  | 3.192390  | -0.688674 |
| C | 2.828147  | 2.049544  | -0.155109 |
| C | 4.249166  | -0.914332 | 0.291933  |
| C | 5.196907  | -1.588841 | 1.066522  |
| H | 5.385427  | 1.180344  | 1.662999  |
| O | 1.995230  | -0.757008 | -0.502020 |
| H | 6.732512  | -0.710462 | 2.334188  |
| C | 3.004924  | -1.491851 | 0.089973  |
| C | 4.945836  | -2.874671 | 1.528189  |
| O | 2.245632  | 1.364870  | 0.899438  |
| C | 2.734766  | -2.800315 | 0.509645  |
| H | 5.683019  | -3.403492 | 2.124811  |
| C | 3.731243  | -3.484547 | 1.212835  |
| H | 3.527764  | -4.499203 | 1.542683  |
| C | 0.923826  | 3.739899  | -0.173195 |
| C | 0.869991  | 4.344286  | 1.097935  |
| C | -0.224813 | 3.703905  | -0.991579 |
| C | 2.003604  | 4.398999  | 1.972895  |
| C | -0.354874 | 4.947084  | 1.545241  |
| C | -1.438929 | 4.323334  | -0.540253 |
| C | -0.255882 | 3.007011  | -2.245554 |
| C | 1.920532  | 4.991204  | 3.197744  |
| H | 2.938340  | 3.957819  | 1.644667  |
| C | -0.398694 | 5.559617  | 2.837727  |
| C | -1.473355 | 4.934551  | 0.712364  |
| C | -2.601684 | 4.275804  | -1.375880 |
| H | 0.633112  | 2.476407  | -2.566377 |
| C | -1.395215 | 2.947017  | -2.992146 |
| C | 0.700003  | 5.580507  | 3.641775  |
| H | 2.790938  | 5.017641  | 3.845363  |
| H | -1.334118 | 6.008409  | 3.160604  |
| H | -2.395049 | 5.402937  | 1.051663  |
| C | -2.586169 | 3.605392  | -2.561065 |
| H | -3.505423 | 4.769366  | -1.027491 |
| H | -1.405895 | 2.376993  | -3.916253 |
| H | 0.655027  | 6.046736  | 4.620714  |
| H | -3.479310 | 3.557915  | -3.176717 |
| C | 1.423045  | -3.434938 | 0.185525  |
| C | 1.121160  | -3.762720 | -1.154831 |
| C | 0.512791  | -3.755898 | 1.211010  |
| C | 2.035538  | -3.522660 | -2.232702 |
| C | -0.124131 | -4.407278 | -1.467704 |
| C | -0.739525 | -4.381369 | 0.882685  |
| C | 0.792955  | -3.497553 | 2.592379  |
| C | 1.748558  | -3.920888 | -3.506365 |
| H | 2.980222  | -3.035232 | -2.017201 |
| C | -0.391636 | -4.799682 | -2.818021 |
| C | -1.035805 | -4.675647 | -0.446562 |
| C | -1.647034 | -4.724780 | 1.934831  |
| H | 1.707774  | -2.975919 | 2.848961  |

|   |           |           |           |
|---|-----------|-----------|-----------|
| C | -0.077114 | -3.884045 | 3.568002  |
| C | 0.518320  | -4.576784 | -3.807236 |
| H | 2.464569  | -3.740515 | -4.301690 |
| H | -1.338338 | -5.288184 | -3.031052 |
| H | -1.980513 | -5.157437 | -0.688152 |
| C | -1.318817 | -4.505408 | 3.238347  |
| H | -2.596300 | -5.180432 | 1.667607  |
| H | 0.168591  | -3.694556 | 4.608686  |
| H | 0.310566  | -4.888711 | -4.825705 |
| H | -2.005802 | -4.790474 | 4.029766  |
| N | -3.371124 | -1.422705 | 0.924964  |
| C | -2.206249 | -1.070651 | 1.494162  |
| N | -4.350869 | -2.031874 | 0.880304  |
| H | -1.533575 | -0.445783 | 0.934377  |
| C | -1.972888 | -1.275184 | 2.849638  |
| O | -0.899503 | -0.883051 | 3.435195  |
| O | -2.921079 | -1.827218 | 3.583309  |
| C | -2.684388 | -1.911252 | 4.990748  |
| H | -3.555559 | -2.420611 | 5.397501  |
| H | -1.774235 | -2.478153 | 5.190630  |
| H | -2.589418 | -0.911217 | 5.417546  |
| C | -4.534664 | 0.812949  | -0.446253 |
| C | -5.575398 | -0.169001 | -0.651676 |
| C | -6.904124 | 0.202364  | -0.235934 |
| C | -7.167768 | 1.386133  | 0.379698  |
| C | -6.115187 | 2.308603  | 0.658280  |
| C | -4.842103 | 2.014210  | 0.275830  |
| H | -7.702329 | -0.511995 | -0.414812 |
| H | -8.184421 | 1.628135  | 0.674215  |
| H | -6.335270 | 3.244524  | 1.160391  |
| H | -4.026366 | 2.703650  | 0.464900  |
| C | -3.186212 | 0.631416  | -0.837830 |
| C | -5.336304 | -1.500879 | -0.977208 |
| H | -6.182644 | -2.178340 | -1.021819 |
| H | -4.436219 | -1.831795 | -1.475615 |
| O | -2.292368 | 1.329688  | -0.202515 |
| H | -1.296086 | 1.150378  | -0.418440 |
| C | -2.759438 | -0.127253 | -2.043579 |
| C | -3.469134 | 0.079175  | -3.234601 |
| C | -1.611938 | -0.924701 | -2.054504 |
| C | -3.027798 | -0.496705 | -4.418749 |
| H | -4.358679 | 0.701605  | -3.218994 |
| C | -1.166885 | -1.488821 | -3.245298 |
| H | -1.048761 | -1.102499 | -1.145983 |
| C | -1.871226 | -1.276942 | -4.426484 |
| H | -3.579195 | -0.327537 | -5.338040 |
| H | -0.260538 | -2.083869 | -3.240715 |
| H | -1.518235 | -1.718190 | -5.353488 |

**TS-[4+2]-B3-S**

|   |           |           |           |
|---|-----------|-----------|-----------|
| P | -1.177708 | 0.332723  | -0.224440 |
| O | 0.033998  | 0.586423  | 0.627144  |
| O | -2.273439 | -0.222727 | 0.839456  |
| O | -1.851678 | 1.722689  | -0.733800 |
| C | -3.493867 | -0.609734 | 0.320136  |
| C | -4.499782 | 0.334721  | 0.193722  |
| C | -2.125865 | 2.677797  | 0.230903  |
| C | -3.350322 | 2.649197  | 0.889190  |

|   |           |           |           |                      |           |           |           |
|---|-----------|-----------|-----------|----------------------|-----------|-----------|-----------|
| C | -5.692805 | -0.015735 | -0.443756 | N                    | 2.828654  | -2.403409 | -0.459767 |
| C | -5.919201 | -1.326404 | -0.843267 | C                    | 1.662041  | -1.993606 | -0.986460 |
| C | -3.589454 | 3.561225  | 1.922414  | N                    | 3.755040  | -3.096158 | -0.443800 |
| C | -2.656974 | 4.538332  | 2.241870  | H                    | 1.053271  | -1.323975 | -0.401515 |
| C | -4.921851 | -2.279367 | -0.641107 | C                    | 1.308105  | -2.356687 | -2.281372 |
| H | -5.081649 | -3.307452 | -0.952441 | O                    | 0.259449  | -1.926359 | -2.882295 |
| C | -3.679444 | -1.936587 | -0.094670 | O                    | 2.125283  | -3.148798 | -2.953999 |
| C | -1.458340 | 4.581942  | 1.536332  | C                    | 1.860596  | -3.317157 | -4.350069 |
| H | -0.710444 | 5.332232  | 1.775166  | H                    | 2.610794  | -4.023871 | -4.698957 |
| C | -1.158552 | 3.645594  | 0.539816  | H                    | 0.854438  | -3.707362 | -4.500447 |
| O | -1.116630 | -0.534233 | -1.443725 | H                    | 1.964382  | -2.361752 | -4.868745 |
| H | -0.337804 | -1.304509 | -2.255676 | C                    | 4.673114  | 0.360440  | 0.144371  |
| C | -2.564219 | -2.922070 | -0.003181 | C                    | 4.730641  | 0.739394  | -1.198374 |
| C | -1.987407 | -3.232648 | 1.246707  | C                    | 5.913523  | 1.246659  | -1.727427 |
| C | -2.079257 | -3.538264 | -1.178096 | C                    | 7.030392  | 1.404310  | -0.910625 |
| C | -2.479461 | -2.692675 | 2.479971  | C                    | 6.968922  | 1.044292  | 0.436579  |
| C | -0.876781 | -4.141204 | 1.313209  | C                    | 5.796033  | 0.519901  | 0.962915  |
| C | -1.001213 | -4.483677 | -1.089141 | H                    | 5.960006  | 1.529617  | -2.774019 |
| C | -2.605179 | -3.252342 | -2.481841 | H                    | 7.949193  | 1.811741  | -1.320297 |
| C | -1.903224 | -3.014380 | 3.672371  | H                    | 7.835084  | 1.179442  | 1.075799  |
| H | -3.334350 | -2.026214 | 2.455101  | H                    | 5.733472  | 0.240064  | 2.010385  |
| C | -0.285590 | -4.436644 | 2.582665  | C                    | 3.360130  | -0.016748 | 0.727447  |
| C | -0.409451 | -4.742830 | 0.146529  | O                    | 2.415896  | 0.693155  | 0.213715  |
| C | -0.558173 | -5.156261 | -2.272555 | H                    | 1.389498  | 0.573715  | 0.454936  |
| H | -3.352457 | -2.474940 | -2.584881 | C                    | 3.169132  | -0.936314 | 1.799881  |
| C | -2.170225 | -3.927294 | -3.583759 | C                    | 4.040154  | -2.064546 | 2.061239  |
| C | -0.782283 | -3.894316 | 3.727964  | C                    | 2.012143  | -0.734749 | 2.627041  |
| H | -2.300396 | -2.598379 | 4.592883  | C                    | 3.672235  | -2.909251 | 3.166813  |
| H | 0.570789  | -5.104830 | 2.607184  | C                    | 1.726415  | -1.563308 | 3.668535  |
| H | 0.423843  | -5.439831 | 0.202644  | H                    | 1.377822  | 0.122985  | 2.434477  |
| C | -1.148004 | -4.914575 | -3.477171 | C                    | 2.575571  | -2.674621 | 3.938161  |
| H | 0.246246  | -5.881130 | -2.178871 | H                    | 4.309063  | -3.765525 | 3.369967  |
| H | -2.592070 | -3.699065 | -4.557259 | H                    | 0.855429  | -1.380006 | 4.288039  |
| H | -0.330972 | -4.128809 | 4.687396  | H                    | 2.345047  | -3.338321 | 4.766615  |
| H | -0.831302 | -5.458891 | -4.362243 | H                    | -6.852462 | -1.607100 | -1.322171 |
| C | 0.170793  | 3.693421  | -0.136483 | H                    | -2.849280 | 5.247762  | 3.041089  |
| C | 1.342238  | 3.498368  | 0.624316  | C                    | -4.573934 | 1.767854  | 0.686156  |
| C | 0.261554  | 3.991261  | -1.511870 | C                    | -6.563615 | 1.208188  | -0.622052 |
| C | 1.309572  | 3.097393  | 2.001252  | C                    | -5.573957 | 2.358777  | -0.347200 |
| C | 2.628567  | 3.645797  | 0.001828  | C                    | -5.199040 | 1.833008  | 2.110207  |
| C | 1.553764  | 4.103809  | -2.129441 | C                    | -4.911268 | 3.264857  | 2.591301  |
| C | -0.893028 | 4.208377  | -2.331982 | H                    | -6.054295 | 3.272265  | 0.014845  |
| C | 2.461041  | 2.904157  | 2.707242  | H                    | -5.024306 | 2.600426  | -1.263017 |
| H | 0.348095  | 2.914585  | 2.467722  | H                    | -7.391062 | 1.213033  | 0.097895  |
| C | 3.811970  | 3.451633  | 0.782262  | H                    | -7.006193 | 1.259514  | -1.620505 |
| C | 2.704089  | 3.938689  | -1.357937 | H                    | -6.261182 | 1.572601  | 2.108711  |
| C | 1.635908  | 4.400419  | -3.526832 | H                    | -4.672700 | 1.117340  | 2.750856  |
| H | -1.875993 | 4.145236  | -1.878719 | H                    | -5.687648 | 3.962573  | 2.253770  |
| C | -0.772557 | 4.491422  | -3.659970 | H                    | -4.855158 | 3.346354  | 3.680101  |
| C | 3.734516  | 3.098563  | 2.095281  | C                    | 5.007358  | -2.540558 | 1.176400  |
| H | 2.410973  | 2.582532  | 3.742955  | H                    | 5.532201  | -1.912231 | 0.474436  |
| H | 4.776700  | 3.558857  | 0.290835  | H                    | 5.501114  | -3.474926 | 1.422694  |
| H | 3.681420  | 4.032388  | -1.827222 | H                    | 3.837352  | 0.647728  | -1.807837 |
| C | 0.511621  | 4.585412  | -4.272392 |                      |           |           |           |
| H | 2.622092  | 4.478199  | -3.976574 |                      |           |           |           |
| H | -1.661999 | 4.648984  | -4.261360 | <b>TS-[4+2]-B4-R</b> |           |           |           |
| H | 4.639660  | 2.939421  | 2.673324  | P                    | 1.197663  | -0.234817 | -0.435362 |
| H | 0.585611  | 4.810496  | -5.331455 | O                    | 0.083307  | -0.846515 | 0.358552  |
|   |           |           |           | O                    | 2.193103  | 0.361394  | 0.706413  |



|   |           |           |           |                      |           |           |           |
|---|-----------|-----------|-----------|----------------------|-----------|-----------|-----------|
| O | 2.110995  | -1.363457 | -1.161222 | C                    | -2.910104 | -0.643887 | 2.039082  |
| C | 3.380616  | 0.945763  | 0.300442  | C                    | -3.738748 | -1.303897 | 2.955261  |
| C | 4.489954  | 0.125987  | 0.129892  | C                    | -1.794429 | 0.060168  | 2.498696  |
| C | 2.441185  | -2.451030 | -0.360550 | C                    | -3.463220 | -1.244895 | 4.314863  |
| C | 3.586231  | -2.381424 | 0.418265  | H                    | -4.603420 | -1.849795 | 2.589802  |
| C | 5.680495  | 0.665969  | -0.362568 | C                    | -1.530361 | 0.125438  | 3.864052  |
| C | 5.794227  | 2.031327  | -0.577842 | H                    | -1.132122 | 0.547407  | 1.790899  |
| C | 3.857278  | -3.401492 | 1.335983  | C                    | -2.361460 | -0.523061 | 4.772451  |
| C | 3.033280  | -4.514301 | 1.419525  | H                    | -4.107258 | -1.761927 | 5.018453  |
| C | 4.692904  | 2.844574  | -0.339447 | H                    | -0.664565 | 0.678305  | 4.214887  |
| H | 4.793253  | 3.915936  | -0.472071 | H                    | -2.148409 | -0.473279 | 5.835373  |
| C | 3.449201  | 2.329831  | 0.059506  | H                    | 6.726182  | 2.463536  | -0.929563 |
| C | 1.913378  | -4.587902 | 0.595881  | H                    | 3.245666  | -5.309698 | 2.127653  |
| H | 1.259405  | -5.453196 | 0.644955  | C                    | 4.695547  | -1.345761 | 0.452848  |
| C | 1.578620  | -3.555775 | -0.287889 | C                    | 6.699639  | -0.423463 | -0.600237 |
| O | 0.932050  | 0.777946  | -1.517432 | C                    | 5.832425  | -1.693929 | -0.549017 |
| H | 0.252530  | 1.868319  | -1.708904 | C                    | 5.207980  | -1.537818 | 1.909265  |
| C | 2.286577  | 3.254475  | 0.187634  | C                    | 5.067070  | -3.048400 | 2.169696  |
| C | 1.232964  | 3.048822  | 1.095601  | H                    | 6.383437  | -2.591381 | -0.254138 |
| C | 2.257231  | 4.409543  | -0.600462 | H                    | 5.384154  | -1.875569 | -1.531249 |
| C | 0.196051  | 3.972001  | 1.217299  | H                    | 7.462387  | -0.427617 | 0.188145  |
| C | 1.255446  | 5.370292  | -0.463027 | H                    | 7.222078  | -0.302264 | -1.553100 |
| C | 0.227200  | 5.136483  | 0.444425  | H                    | 6.225673  | -1.160375 | 2.043671  |
| H | -0.575606 | 5.865299  | 0.548743  | H                    | 4.546273  | -0.984385 | 2.583593  |
| C | 0.315354  | -3.622578 | -1.065953 | H                    | 5.954752  | -3.595891 | 1.829426  |
| C | -0.857418 | -4.036391 | -0.433706 | H                    | 4.927469  | -3.286380 | 3.227673  |
| C | 0.271827  | -3.284305 | -2.424141 | H                    | 3.025078  | 4.566224  | -1.352197 |
| C | -2.064858 | -4.115756 | -1.130313 | H                    | 1.228088  | 2.164752  | 1.723727  |
| C | -0.915740 | -3.373070 | -3.144747 | H                    | 1.178337  | -2.949230 | -2.919183 |
| C | -2.075045 | -3.793349 | -2.484949 | H                    | -0.838593 | -4.251525 | 0.632356  |
| H | -3.009894 | -3.855814 | -3.040363 | C                    | 1.301078  | 6.633356  | -1.287258 |
| N | -3.148969 | 1.844331  | 0.030953  | C                    | -0.955584 | 3.741125  | 2.162462  |
| C | -1.970880 | 1.721616  | -0.598701 | C                    | -0.950880 | -3.044867 | -4.615748 |
| N | -4.038570 | 2.460611  | 0.425958  | C                    | -3.333694 | -4.474203 | -0.401509 |
| H | -1.506270 | 0.751817  | -0.655502 | H                    | 2.115552  | 7.285296  | -0.956530 |
| C | -1.439525 | 2.818873  | -1.286454 | H                    | 1.472837  | 6.411493  | -2.345278 |
| O | -0.329620 | 2.786859  | -1.909433 | H                    | 0.369257  | 7.198476  | -1.201510 |
| O | -2.158710 | 3.927402  | -1.312514 | H                    | -1.911300 | 3.795850  | 1.628885  |
| C | -1.744521 | 4.956494  | -2.217771 | H                    | -0.979380 | 4.502438  | 2.948591  |
| H | -2.029232 | 4.678511  | -3.235169 | H                    | -0.892935 | 2.762297  | 2.642109  |
| H | -2.281666 | 5.850816  | -1.906688 | H                    | -0.112047 | -2.404164 | -4.895918 |
| H | -0.668374 | 5.105701  | -2.160565 | H                    | -1.877809 | -2.530406 | -4.882508 |
| C | -4.500601 | -0.651313 | 0.029341  | H                    | -0.893884 | -3.955351 | -5.221608 |
| C | -5.553095 | 0.175967  | 0.587501  | H                    | -4.163828 | -4.629811 | -1.094841 |
| C | -6.818038 | 0.169205  | -0.112095 | H                    | -3.619595 | -3.664569 | 0.280855  |
| C | -7.013724 | -0.531623 | -1.257673 | H                    | -3.208576 | -5.381179 | 0.196814  |
| C | -5.944522 | -1.283991 | -1.838522 |                      |           |           |           |
| C | -4.732350 | -1.317445 | -1.226116 |                      |           |           |           |
| H | -7.622834 | 0.762827  | 0.311438  | <b>TS-[4+2]-B4-S</b> |           |           |           |
| H | -7.983585 | -0.513739 | -1.745181 | H                    | 0.624546  | 1.950221  | -1.590033 |
| H | -6.107716 | -1.831056 | -2.760984 | P                    | 1.223944  | -0.287796 | -0.278322 |
| H | -3.909150 | -1.884796 | -1.647949 | O                    | 1.091187  | 0.722464  | -1.383484 |
| C | -3.211499 | -0.783384 | 0.587632  | O                    | 0.067300  | -0.585878 | 0.639140  |
| C | -5.370094 | 1.122639  | 1.582432  | H                    | 5.018953  | -3.882685 | 2.913190  |
| H | -6.204071 | 1.768616  | 1.836039  | H                    | 5.705183  | -4.347175 | 1.356915  |
| H | -4.555817 | 1.102229  | 2.290834  | H                    | 2.872420  | -5.598511 | 2.237757  |
| O | -2.267810 | -1.230365 | -0.195886 | C                    | 4.991854  | -3.668765 | 1.841343  |
| H | -1.283362 | -1.185013 | 0.140273  | C                    | 2.654218  | -4.792536 | 1.543498  |
|   |           |           |           | H                    | 6.375871  | -1.979012 | 1.457183  |

|   |           |           |           |                           |           |           |           |
|---|-----------|-----------|-----------|---------------------------|-----------|-----------|-----------|
| C | 5.306463  | -2.200381 | 1.514173  | H                         | -1.528760 | -0.535732 | 4.534696  |
| C | 3.609222  | -3.828655 | 1.256152  | H                         | -1.591674 | -1.164716 | 2.177149  |
| H | 4.864052  | -1.551225 | 2.276881  | C                         | -3.254338 | -0.368477 | 0.320311  |
| C | 1.401910  | -4.700090 | 0.945721  | C                         | -5.135763 | 1.782599  | 1.391033  |
| H | 0.644485  | -5.448774 | 1.155954  | H                         | -5.754785 | 2.528620  | 1.877502  |
| H | 5.921479  | -3.402500 | -0.807421 | H                         | -5.434010 | 1.501440  | 0.392556  |
| H | 7.377730  | -1.441016 | -0.567732 | O                         | -2.179173 | -0.832871 | -0.228254 |
| C | 3.335278  | -2.794148 | 0.354749  | H                         | -1.228437 | -0.742200 | 0.242313  |
| C | 4.578145  | -1.935169 | 0.163602  | C                         | -4.419533 | -0.526977 | -0.586940 |
| C | 5.468691  | -2.427947 | -1.010915 | C                         | -4.235984 | -0.355176 | -1.961589 |
| C | 6.499512  | -1.298229 | -1.209104 | C                         | -5.639373 | -1.010211 | -0.102905 |
| C | 1.069774  | -3.648607 | 0.082387  | C                         | -5.276285 | -0.631991 | -2.842586 |
| C | 2.067519  | -2.703055 | -0.207068 | H                         | -3.269918 | -0.016122 | -2.323228 |
| C | 4.547560  | -0.444541 | -0.132146 | C                         | -6.668288 | -1.308222 | -0.987900 |
| C | 5.716376  | -0.072626 | -0.797165 | H                         | -5.768050 | -1.154197 | 0.965918  |
| H | 4.843888  | -2.520955 | -1.905104 | C                         | -6.490159 | -1.114428 | -2.357725 |
| O | 2.418912  | 0.080463  | 0.754389  | H                         | -5.135593 | -0.483365 | -3.908487 |
| H | 6.861505  | -1.230832 | -2.238701 | H                         | -7.609094 | -1.695354 | -0.610837 |
| C | 3.611565  | 0.520802  | 0.208413  | H                         | -7.297015 | -1.343638 | -3.046415 |
| C | 5.998124  | 1.270941  | -1.000731 | H                         | 0.251283  | -3.060760 | -2.465741 |
| O | 1.777005  | -1.617154 | -1.024512 | H                         | -1.201435 | -3.984479 | 1.461767  |
| C | 3.838701  | 1.891301  | -0.017102 | H                         | 1.668203  | 1.864263  | 1.736277  |
| H | 6.920432  | 1.578965  | -1.484089 | H                         | 3.681549  | 4.334589  | -1.154078 |
| C | 5.079226  | 2.228409  | -0.583300 | C                         | 2.200363  | 6.550876  | -0.847720 |
| H | 5.327048  | 3.275064  | -0.716171 | C                         | -0.347941 | 3.545002  | 2.314802  |
| C | -0.316293 | -3.556160 | -0.450302 | C                         | -2.153336 | -2.970605 | -3.738987 |
| C | -0.577296 | -3.268340 | -1.794669 | C                         | -3.855290 | -3.941017 | 0.908567  |
| C | -1.393416 | -3.802789 | 0.406270  | H                         | 1.304558  | 7.171498  | -0.760489 |
| C | -1.883051 | -3.255203 | -2.283354 | H                         | 2.429847  | 6.424268  | -1.910347 |
| C | -2.709483 | -3.775066 | -0.056822 | H                         | 3.030586  | 7.106716  | -0.400575 |
| C | -2.937933 | -3.516804 | -1.406549 | H                         | -1.251597 | 4.036748  | 1.940398  |
| H | -3.961985 | -3.473948 | -1.775898 | H                         | -0.146042 | 3.943583  | 3.314648  |
| C | 2.827184  | 2.953726  | 0.269043  | H                         | -0.559853 | 2.476355  | 2.413018  |
| C | 1.769608  | 2.786806  | 1.180198  | H                         | -2.089519 | -3.884780 | -4.338751 |
| C | 2.913759  | 4.180149  | -0.402608 | H                         | -1.427341 | -2.260001 | -4.142239 |
| C | 0.816949  | 3.784156  | 1.385510  | H                         | -3.155812 | -2.555093 | -3.873902 |
| C | 2.016522  | 5.219465  | -0.160700 | H                         | -4.811006 | -4.001678 | 0.382283  |
| C | 0.957363  | 5.003351  | 0.718984  | H                         | -3.903469 | -3.085250 | 1.593786  |
| H | 0.223296  | 5.791108  | 0.882167  | H                         | -3.738624 | -4.840335 | 1.520548  |
| N | -2.760630 | 2.348779  | 0.075731  |                           |           |           |           |
| C | -1.580835 | 2.103505  | -0.504109 | <b>TS-(3+2)-B2-1R2S5R</b> |           |           |           |
| N | -3.637968 | 3.017156  | 0.410600  | H                         | -0.182723 | -0.144186 | 1.711218  |
| H | -1.156358 | 1.120518  | -0.420668 | P                         | -1.334108 | -1.003920 | 0.115866  |
| C | -0.923243 | 3.105603  | -1.221621 | O                         | -1.149915 | -0.331768 | 1.519261  |
| O | 0.199737  | 2.929171  | -1.803480 | O                         | -0.206235 | -0.944351 | -0.825156 |
| O | -1.514445 | 4.280948  | -1.328024 | H                         | -5.065243 | -3.803534 | -3.730600 |
| C | -0.898917 | 5.239793  | -2.194904 | H                         | -5.595414 | -4.819210 | -2.391273 |
| H | -1.433343 | 6.171331  | -2.018984 | H                         | -2.703534 | -5.429855 | -3.708447 |
| H | 0.158444  | 5.341308  | -1.955493 | C                         | -4.982342 | -3.947498 | -2.650363 |
| H | -1.012709 | 4.924710  | -3.234432 | C                         | -2.525259 | -4.858965 | -2.802576 |
| C | -3.308798 | 0.073780  | 1.668039  | H                         | -6.486879 | -2.642240 | -1.672535 |
| C | -4.284585 | 1.019501  | 2.178143  | C                         | -5.409137 | -2.702827 | -1.846840 |
| C | -4.181484 | 1.354770  | 3.577915  | C                         | -3.551946 | -4.142047 | -2.202450 |
| C | -3.228567 | 0.826890  | 4.390042  | H                         | -5.097686 | -1.798045 | -2.378835 |
| C | -2.269778 | -0.097439 | 3.875633  | C                         | -1.249046 | -4.815537 | -2.243955 |
| C | -2.304374 | -0.442145 | 2.560003  | H                         | -0.436413 | -5.368251 | -2.706025 |
| H | -4.904042 | 2.063548  | 3.971886  | H                         | -5.725650 | -4.639882 | -0.027581 |
| H | -3.197294 | 1.103976  | 5.439283  | H                         | -7.334297 | -2.867561 | 0.524331  |

|   |           |           |           |                           |           |           |           |
|---|-----------|-----------|-----------|---------------------------|-----------|-----------|-----------|
| C | -3.316653 | -3.411705 | -1.034640 | H                         | 6.296534  | 1.951768  | -3.397697 |
| C | -4.601277 | -2.799553 | -0.519235 | H                         | 8.062394  | 2.773295  | -1.930487 |
| C | -5.329887 | -3.750765 | 0.470854  | H                         | 7.587312  | 3.305064  | 0.477196  |
| C | -6.412458 | -2.870782 | 1.118304  | H                         | 5.352932  | 2.864912  | 1.408170  |
| C | -0.973986 | -4.046401 | -1.108846 | C                         | 3.185453  | 2.051218  | 0.116551  |
| C | -2.036840 | -3.349232 | -0.517521 | C                         | 3.812756  | 1.413110  | -2.766434 |
| C | -4.649448 | -1.495477 | 0.265677  | H                         | 2.783517  | 1.198314  | -2.509836 |
| C | -5.765433 | -1.505147 | 1.111746  | C                         | 2.443166  | -0.183899 | 1.560531  |
| H | -4.613174 | -4.076020 | 1.231961  | O                         | 1.332723  | 0.072157  | 2.007017  |
| O | -2.672546 | -0.355516 | -0.520573 | C                         | 2.823755  | -0.022019 | 0.140382  |
| H | -6.679663 | -3.197466 | 2.126643  | H                         | 2.092450  | -0.350982 | -0.598639 |
| C | -3.853181 | -0.356174 | 0.217731  | N                         | 4.102822  | -0.487981 | -0.083011 |
| C | 1.454467  | -3.621344 | -1.481236 | N                         | 5.160950  | -0.082014 | -0.233917 |
| C | 0.407903  | -3.887833 | -0.595132 | O                         | 3.462253  | -0.495005 | 2.342735  |
| C | -6.141894 | -0.371814 | 1.817379  | C                         | 3.244983  | -0.340031 | 3.751673  |
| O | -1.801964 | -2.492716 | 0.553351  | H                         | 4.171516  | -0.662672 | 4.220581  |
| C | -3.931350 | 3.050050  | -0.164566 | H                         | 3.044764  | 0.711526  | 3.964890  |
| C | -4.232688 | 0.813146  | 0.892169  | H                         | 2.409791  | -0.957939 | 4.076496  |
| H | -7.010404 | -0.387386 | 2.468412  | O                         | 3.123375  | 2.349720  | 1.468770  |
| C | -5.389244 | 0.790450  | 1.675118  | H                         | 2.208975  | 2.580963  | 1.686153  |
| C | 2.739328  | -3.389768 | -1.006227 | H                         | 4.110088  | 1.219286  | -3.791477 |
| C | 0.684539  | -3.923373 | 0.772414  | C                         | 2.019447  | 2.621591  | -0.652954 |
| C | -3.264944 | 4.266461  | -0.298339 | C                         | 0.751782  | 2.041592  | -0.647054 |
| C | -3.475972 | 2.092120  | 0.741899  | C                         | 2.204625  | 3.837317  | -1.322381 |
| H | -5.678314 | 1.697977  | 2.196089  | C                         | -0.296515 | 2.620673  | -1.356861 |
| C | 3.017064  | -3.413330 | 0.357074  | H                         | 0.578727  | 1.116976  | -0.114038 |
| C | 1.974661  | -3.681216 | 1.235308  | C                         | 1.149707  | 4.432696  | -2.003316 |
| C | -2.126960 | 4.541201  | 0.447131  | H                         | 3.187861  | 4.297127  | -1.320467 |
| C | -2.346961 | 2.377536  | 1.513018  | C                         | -0.101067 | 3.817751  | -2.037516 |
| C | -1.672264 | 3.580425  | 1.343132  | H                         | -1.268160 | 2.131524  | -1.363965 |
| C | 3.802855  | -3.003815 | -1.995713 | H                         | 1.308742  | 5.372471  | -2.522366 |
| F | 5.025022  | -3.015760 | -1.452749 | H                         | -0.923384 | 4.274244  | -2.579385 |
| F | 3.585315  | -1.765240 | -2.472625 |                           |           |           |           |
| F | 3.813075  | -3.828087 | -3.052774 |                           |           |           |           |
| C | 2.200368  | -3.697506 | 2.719015  | <b>TS-(3+2)-B2-1R2S5S</b> |           |           |           |
| F | 1.343129  | -2.862853 | 3.338781  | H                         | -0.638730 | 1.143439  | 1.004382  |
| F | 3.439912  | -3.314959 | 3.053314  | P                         | -1.819879 | -0.427520 | 0.083908  |
| F | 1.996269  | -4.912785 | 3.243459  | O                         | -1.485932 | 0.644306  | 1.176944  |
| H | 1.252279  | -3.543939 | -2.545322 | O                         | -0.720788 | -0.972745 | -0.724528 |
| H | 4.015505  | -3.206126 | 0.724710  | H                         | -6.598774 | -3.236451 | -2.529679 |
| H | -0.113888 | -4.113805 | 1.482277  | H                         | -7.260638 | -3.415587 | -0.905542 |
| H | -4.811901 | 2.847376  | -0.766729 | H                         | -4.838222 | -5.349100 | -1.812227 |
| H | -1.985138 | 1.642362  | 2.219643  | C                         | -6.449593 | -2.956419 | -1.483793 |
| H | -1.583019 | 5.468367  | 0.305135  | C                         | -4.400848 | -4.560504 | -1.207903 |
| C | -3.743232 | 5.246975  | -1.331032 | H                         | -7.390631 | -0.971626 | -1.176159 |
| F | -3.313615 | 4.911498  | -2.561040 | C                         | -6.403731 | -1.432444 | -1.272255 |
| F | -3.304800 | 6.486954  | -1.084720 | C                         | -5.100284 | -3.387883 | -0.959305 |
| F | -5.081347 | 5.286922  | -1.389210 | H                         | -5.886817 | -0.960612 | -2.114161 |
| C | -0.408679 | 3.834914  | 2.113625  | C                         | -3.112752 | -4.700398 | -0.699912 |
| F | -0.634046 | 4.441263  | 3.285189  | H                         | -2.550088 | -5.608527 | -0.893807 |
| F | 0.447849  | 4.598237  | 1.424839  | H                         | -7.120458 | -2.271449 | 1.166226  |
| F | 0.236115  | 2.678139  | 2.393567  | H                         | -8.048288 | -0.014828 | 0.864357  |
| C | 4.502197  | 2.108218  | -0.442178 | C                         | -4.542020 | -2.375448 | -0.172139 |
| C | 4.723048  | 1.905178  | -1.892772 | C                         | -5.538671 | -1.244419 | 0.008010  |
| C | 6.090320  | 2.147808  | -2.349039 | C                         | -6.426179 | -1.433145 | 1.270377  |
| C | 7.065241  | 2.603650  | -1.535382 | C                         | -7.124061 | -0.071966 | 1.451917  |
| C | 6.801716  | 2.889113  | -0.144081 | C                         | -2.501280 | -3.680699 | 0.037374  |
| C | 5.575829  | 2.647226  | 0.370371  | C                         | -3.248406 | -2.522033 | 0.302739  |
|   |           |           |           | C                         | -5.118010 | 0.204334  | 0.186117  |

|   |           |           |           |                           |           |           |           |
|---|-----------|-----------|-----------|---------------------------|-----------|-----------|-----------|
| C | -6.087295 | 0.892364  | 0.923790  | C                         | 1.623219  | 1.713078  | -0.062514 |
| H | -5.775648 | -1.631921 | 2.128229  | O                         | 0.687830  | 2.022844  | 0.660956  |
| O | -2.972631 | 0.185465  | -0.880067 | C                         | 2.005864  | 0.293274  | -0.326987 |
| H | -7.389556 | 0.134524  | 2.491941  | H                         | 1.289918  | -0.408516 | 0.103552  |
| C | -4.003002 | 0.889444  | -0.270814 | N                         | 2.239397  | -0.053757 | -1.632130 |
| C | -0.139639 | -4.278075 | -0.478542 | N                         | 3.010240  | -0.635303 | -2.244761 |
| C | -1.074886 | -3.779656 | 0.431500  | O                         | 2.476640  | 2.587220  | -0.562685 |
| C | -5.989944 | 2.263061  | 1.117435  | C                         | 2.575516  | 3.876810  | 0.062668  |
| O | -2.664948 | -1.463268 | 0.995236  | H                         | 2.700446  | 4.610918  | -0.732265 |
| C | -1.979677 | 2.692611  | -1.702419 | H                         | 1.689774  | 4.085476  | 0.659394  |
| C | -3.865081 | 2.272882  | -0.074614 | H                         | 3.464485  | 3.853155  | 0.700079  |
| H | -6.750162 | 2.799566  | 1.676541  | O                         | 3.165163  | -1.341852 | 1.279872  |
| C | -4.891920 | 2.943624  | 0.599421  | H                         | 3.446462  | -1.268164 | 2.201478  |
| C | 1.212266  | -4.313689 | -0.155258 | H                         | 5.884751  | 2.038131  | -2.226982 |
| C | -0.620985 | -3.315145 | 1.668550  | C                         | 4.083740  | 0.844389  | 1.480048  |
| C | -0.847090 | 3.403151  | -2.078002 | C                         | 5.364913  | 1.398747  | 1.566602  |
| C | -2.646675 | 3.002095  | -0.508661 | C                         | 3.120928  | 1.243044  | 2.419166  |
| H | -4.815464 | 4.018452  | 0.731327  | C                         | 5.647243  | 2.379570  | 2.512362  |
| C | 1.665680  | -3.837632 | 1.067452  | H                         | 6.137351  | 1.067679  | 0.883956  |
| C | 0.736274  | -3.324754 | 1.962952  | C                         | 3.402801  | 2.226829  | 3.362765  |
| C | -0.366803 | 4.455867  | -1.308252 | H                         | 2.142469  | 0.771551  | 2.416893  |
| C | -2.136290 | 4.033564  | 0.284781  | C                         | 4.665931  | 2.809000  | 3.404019  |
| C | -1.020573 | 4.757508  | -0.122480 | H                         | 6.646688  | 2.799812  | 2.560117  |
| C | 2.199001  | -4.771144 | -1.193313 | H                         | 2.635123  | 2.528447  | 4.067711  |
| F | 3.373103  | -5.122390 | -0.644033 | H                         | 4.891272  | 3.576253  | 4.137604  |
| F | 2.450486  | -3.807798 | -2.087337 |                           |           |           |           |
| F | 1.738139  | -5.830774 | -1.875668 |                           |           |           |           |
| C | 1.178836  | -2.674057 | 3.238951  | <b>TS-(3+2)-B2-1S2R5R</b> |           |           |           |
| F | 2.486961  | -2.864644 | 3.488424  | H                         | 0.499395  | 0.153467  | 1.834084  |
| F | 0.498137  | -3.125362 | 4.299542  | P                         | 0.927002  | 1.238172  | 0.039780  |
| F | 0.981519  | -1.342175 | 3.194445  | O                         | 1.313172  | 0.462824  | 1.345817  |
| H | -0.462959 | -4.603844 | -1.462301 | O                         | -0.164307 | 0.707815  | -0.799160 |
| H | 2.720651  | -3.836640 | 1.308612  | H                         | 2.619615  | 5.788293  | -3.609644 |
| H | -1.323553 | -2.913371 | 2.390555  | H                         | 2.761146  | 6.790942  | -2.166779 |
| H | -2.341501 | 1.895536  | -2.340544 | H                         | -0.194901 | 6.163739  | -3.281506 |
| H | -2.604258 | 4.266090  | 1.236554  | C                         | 2.583244  | 5.767123  | -2.517538 |
| H | 0.497215  | 5.024824  | -1.629413 | C                         | -0.019912 | 5.484335  | -2.453259 |
| C | -0.074260 | 2.967641  | -3.290612 | H                         | 4.595623  | 5.198603  | -1.778026 |
| F | 0.801391  | 1.999262  | -2.969413 | C                         | 3.593357  | 4.780354  | -1.904015 |
| F | 0.631358  | 3.976328  | -3.819480 | C                         | 1.267147  | 5.242076  | -1.994152 |
| F | -0.871945 | 2.477863  | -4.245683 | H                         | 3.672084  | 3.892676  | -2.540021 |
| C | -0.494452 | 5.832292  | 0.784227  | C                         | -1.089102 | 4.833131  | -1.844666 |
| F | -1.458224 | 6.680044  | 1.165243  | H                         | -2.102651 | 5.027238  | -2.181787 |
| F | 0.477772  | 6.549603  | 0.203143  | H                         | 3.191784  | 6.444603  | 0.159221  |
| F | 0.023220  | 5.304788  | 1.908059  | H                         | 5.467221  | 5.550348  | 0.385838  |
| C | 4.574040  | -0.738978 | -0.548312 | C                         | 1.488133  | 4.370642  | -0.923310 |
| C | 5.376843  | 0.154989  | -1.423796 | C                         | 2.955579  | 4.361327  | -0.546450 |
| C | 6.248886  | -0.524154 | -2.384424 | C                         | 3.283666  | 5.423634  | 0.539622  |
| C | 6.363033  | -1.864039 | -2.467457 | C                         | 4.705904  | 5.064039  | 1.007458  |
| C | 5.620312  | -2.719989 | -1.574663 | C                         | -0.894685 | 3.914913  | -0.806197 |
| C | 4.783864  | -2.173496 | -0.667153 | C                         | 0.416437  | 3.696458  | -0.364027 |
| H | 6.816062  | 0.117086  | -3.053565 | C                         | 3.660810  | 3.147419  | 0.033844  |
| H | 7.023907  | -2.307035 | -3.206367 | C                         | 4.738638  | 3.564770  | 0.822249  |
| H | 5.732595  | -3.797025 | -1.630157 | H                         | 2.579314  | 5.303170  | 1.369124  |
| H | 4.229890  | -2.813319 | 0.005214  | O                         | 2.289367  | 1.365280  | -0.805285 |
| C | 3.740616  | -0.295309 | 0.545749  | H                         | 4.899534  | 5.357683  | 2.042397  |
| C | 5.294242  | 1.504217  | -1.490187 | C                         | 3.448700  | 1.790376  | -0.156494 |
| H | 4.649655  | 2.091359  | -0.854185 | C                         | -3.062408 | 2.715433  | -1.050190 |
|   |           |           |           | C                         | -2.052135 | 3.198802  | -0.219119 |

|   |           |           |           |                           |           |           |           |
|---|-----------|-----------|-----------|---------------------------|-----------|-----------|-----------|
| C | 5.646612  | 2.643602  | 1.323355  | C                         | -2.295251 | -1.568772 | 4.302435  |
| O | 0.673699  | 2.732049  | 0.609220  | H                         | -3.045493 | -2.129897 | 4.854593  |
| C | 3.726056  | -1.077590 | -1.204601 | H                         | -1.319466 | -2.052165 | 4.370276  |
| C | 4.365124  | 0.833605  | 0.306874  | H                         | -2.224496 | -0.544080 | 4.670526  |
| H | 6.491023  | 2.966943  | 1.923944  | O                         | -1.881105 | -1.261753 | -1.851229 |
| C | 5.470734  | 1.294592  | 1.032540  | H                         | -1.041302 | -0.811690 | -1.654476 |
| C | -4.196503 | 2.113899  | -0.510013 | H                         | -2.441117 | -3.703827 | 1.442182  |
| C | -2.176641 | 3.018616  | 1.165359  | C                         | -0.939325 | -3.014252 | -0.467088 |
| C | 3.707501  | -2.438072 | -1.491334 | C                         | 0.094765  | -2.435965 | 0.264857  |
| C | 4.221656  | -0.616474 | 0.020349  | C                         | -0.809348 | -4.346076 | -0.875457 |
| H | 6.207491  | 0.574071  | 1.372496  | C                         | 1.198862  | -3.181409 | 0.662032  |
| C | -4.341941 | 1.973281  | 0.861499  | H                         | 0.023931  | -1.394287 | 0.535748  |
| C | -3.308039 | 2.409657  | 1.688255  | C                         | 0.299383  | -5.092469 | -0.491944 |
| C | 4.199769  | -3.368485 | -0.588260 | H                         | -1.594986 | -4.799667 | -1.470432 |
| C | 4.668185  | -1.561594 | 0.952164  | C                         | 1.294775  | -4.521106 | 0.298338  |
| C | 4.666991  | -2.915232 | 0.640563  | H                         | 1.977162  | -2.712657 | 1.257571  |
| C | -5.213789 | 1.534118  | -1.453691 | H                         | 0.378540  | -6.129766 | -0.801006 |
| F | -6.329108 | 1.159164  | -0.819609 | H                         | 2.141671  | -5.112798 | 0.631756  |
| F | -4.718182 | 0.458791  | -2.082591 |                           |           |           |           |
| F | -5.556855 | 2.417251  | -2.403968 |                           |           |           |           |
| C | -3.444830 | 2.194844  | 3.168238  | <b>TS-(3+2)-B2-1S2R5S</b> |           |           |           |
| F | -2.288446 | 2.371162  | 3.817668  | H                         | -0.238586 | -1.057756 | -0.949530 |
| F | -3.860854 | 0.939116  | 3.426672  | P                         | -2.000854 | -0.143592 | -0.146397 |
| F | -4.347696 | 3.018360  | 3.715826  | O                         | -1.218448 | -1.031391 | -1.173681 |
| H | -2.957821 | 2.790158  | -2.128390 | O                         | -1.286455 | 0.885828  | 0.616817  |
| H | -5.219750 | 1.489988  | 1.276073  | H                         | -7.738323 | 0.318172  | 2.062173  |
| H | -1.389327 | 3.352705  | 1.831081  | H                         | -8.289138 | -0.002160 | 0.418957  |
| H | 3.366231  | -0.376255 | -1.948186 | H                         | -7.175757 | 2.942623  | 1.083501  |
| H | 5.017340  | -1.241063 | 1.927897  | C                         | -7.400087 | 0.044755  | 1.059421  |
| H | 4.196248  | -4.425833 | -0.827836 | C                         | -6.359894 | 2.405441  | 0.610034  |
| C | 3.065248  | -2.898740 | -2.770768 | H                         | -7.256041 | -2.166660 | 0.972664  |
| F | 1.731604  | -2.907889 | -2.663135 | C                         | -6.617381 | -1.281216 | 1.032103  |
| F | 3.452214  | -4.137886 | -3.102336 | C                         | -6.386033 | 1.020818  | 0.510578  |
| F | 3.373294  | -2.087272 | -3.793781 | H                         | -6.001956 | -1.363826 | 1.933761  |
| C | 5.064647  | -3.926665 | 1.675697  | C                         | -5.251780 | 3.098086  | 0.132166  |
| F | 5.840902  | -3.397045 | 2.629204  | H                         | -5.215554 | 4.179304  | 0.223342  |
| F | 5.724177  | -4.958397 | 1.133805  | H                         | -7.470278 | -1.077236 | -1.494773 |
| F | 3.979276  | -4.436869 | 2.287653  | H                         | -7.271365 | -3.470926 | -0.961179 |
| C | -3.419222 | -2.844547 | -1.058500 | C                         | -5.348373 | 0.333396  | -0.125620 |
| C | -3.865111 | -3.929564 | -0.148429 | C                         | -5.675893 | -1.149096 | -0.200146 |
| C | -5.069669 | -4.643819 | -0.569404 | C                         | -6.463641 | -1.503986 | -1.493244 |
| C | -5.696723 | -4.394343 | -1.735923 | C                         | -6.444566 | -3.042549 | -1.540462 |
| C | -5.192091 | -3.398119 | -2.656941 | C                         | -4.154671 | 2.434308  | -0.430687 |
| C | -4.105976 | -2.667870 | -2.332741 | C                         | -4.243382 | 1.038928  | -0.576112 |
| H | -5.445610 | -5.407323 | 0.106260  | C                         | -4.618821 | -2.244417 | -0.220925 |
| H | -6.586348 | -4.957282 | -2.002223 | C                         | -5.112831 | -3.362444 | -0.902972 |
| H | -5.684173 | -3.255313 | -3.612780 | H                         | -5.919915 | -1.101333 | -2.353999 |
| H | -3.705918 | -1.925785 | -3.012218 | O                         | -2.789460 | -1.144980 | 0.864627  |
| C | -2.139032 | -2.213169 | -0.902925 | H                         | -6.522501 | -3.438870 | -2.556132 |
| C | -3.320113 | -4.203811 | 1.057475  | C                         | -3.337294 | -2.290483 | 0.308490  |
| H | -3.770676 | -4.962023 | 1.689391  | C                         | -2.469095 | 4.141722  | 0.209709  |
| C | -1.997491 | -0.881710 | 2.093825  | C                         | -2.877982 | 3.149940  | -0.686183 |
| O | -0.946064 | -0.351325 | 2.437517  | C                         | -4.377744 | -4.537392 | -0.969384 |
| C | -2.531398 | -0.851056 | 0.713958  | O                         | -3.193269 | 0.328155  | -1.137184 |
| H | -2.164013 | 0.014657  | 0.158509  | C                         | -0.717368 | -2.816540 | 1.850774  |
| N | -3.912612 | -0.906612 | 0.652586  | C                         | -2.552136 | -3.453570 | 0.224904  |
| N | -4.702793 | -1.443511 | 0.012678  | H                         | -4.771313 | -5.408751 | -1.483362 |
| O | -2.747828 | -1.563201 | 2.944726  | C                         | -3.112677 | -4.578291 | -0.390821 |
|   |           |           |           | C                         | -1.205524 | 4.711948  | 0.117102  |

|   |           |           |           |
|---|-----------|-----------|-----------|
| C | -1.989593 | 2.777706  | -1.699642 |
| C | 0.612763  | -2.874722 | 2.247512  |
| C | -1.140710 | -3.482286 | 0.691502  |
| H | -2.533004 | -5.495307 | -0.432466 |
| C | -0.288623 | 4.273010  | -0.829514 |
| C | -0.702065 | 3.299340  | -1.729147 |
| C | 1.552708  | -3.606573 | 1.529624  |
| C | -0.185260 | -4.189635 | -0.047852 |
| C | 1.140520  | -4.254380 | 0.372265  |
| C | -0.815695 | 5.734980  | 1.144159  |
| F | 0.307525  | 6.383711  | 0.812683  |
| F | -0.609731 | 5.169512  | 2.347922  |
| F | -1.780671 | 6.650946  | 1.315039  |
| C | 0.280211  | 2.666365  | -2.665146 |
| F | 1.441741  | 3.327189  | -2.729165 |
| F | -0.196554 | 2.539591  | -3.906925 |
| F | 0.585605  | 1.406242  | -2.247050 |
| H | -3.122746 | 4.439538  | 1.023610  |
| H | 0.724310  | 4.658573  | -0.845895 |
| H | -2.272024 | 2.024449  | -2.425756 |
| H | -1.423924 | -2.246621 | 2.441551  |
| H | -0.473132 | -4.679351 | -0.973253 |
| H | 2.587695  | -3.653073 | 1.852371  |
| C | 1.080214  | -2.065192 | 3.424434  |
| F | 1.603064  | -0.890661 | 3.018983  |
| F | 2.044078  | -2.699739 | 4.105971  |
| F | 0.089213  | -1.784875 | 4.273406  |
| C | 2.133901  | -5.059806 | -0.418967 |
| F | 2.116719  | -6.351786 | -0.063989 |
| F | 3.383087  | -4.614177 | -0.242311 |
| F | 1.864355  | -5.014962 | -1.735417 |
| C | 5.394917  | 0.619009  | -0.620835 |
| C | 6.199557  | 0.671335  | 0.618092  |
| C | 7.642950  | 0.569436  | 0.417039  |
| C | 8.211733  | 0.547774  | -0.807764 |
| C | 7.410159  | 0.622966  | -2.004406 |
| C | 6.061109  | 0.646467  | -1.905148 |
| H | 8.260533  | 0.532926  | 1.310277  |
| H | 9.292281  | 0.487616  | -0.897889 |
| H | 7.892791  | 0.663330  | -2.974537 |
| H | 5.434632  | 0.702922  | -2.787547 |
| C | 3.971099  | 0.772416  | -0.578601 |
| C | 5.702933  | 0.691526  | 1.879744  |
| H | 4.650719  | 0.793796  | 2.110935  |
| C | 2.279100  | -1.421957 | -0.563852 |
| O | 1.156518  | -0.988346 | -0.348821 |
| C | 3.414634  | -1.038124 | 0.293052  |
| H | 3.187065  | -0.911157 | 1.348239  |
| N | 4.533083  | -1.804580 | 0.049385  |
| N | 5.578591  | -1.701029 | -0.400045 |
| O | 2.594959  | -2.161911 | -1.610348 |
| C | 1.589078  | -2.240008 | -2.629451 |
| H | 2.026925  | -2.838362 | -3.423793 |
| H | 0.689970  | -2.723075 | -2.240787 |
| H | 1.353193  | -1.231988 | -2.977749 |
| O | 3.349701  | 0.655006  | -1.809681 |
| H | 2.546080  | 1.193394  | -1.803721 |
| H | 6.386061  | 0.644847  | 2.721029  |

|   |          |          |           |
|---|----------|----------|-----------|
| C | 3.341629 | 1.843009 | 0.285826  |
| C | 2.053137 | 1.739598 | 0.821254  |
| C | 4.036414 | 3.053320 | 0.423339  |
| C | 1.490416 | 2.810321 | 1.516274  |
| H | 1.467934 | 0.833401 | 0.718137  |
| C | 3.474606 | 4.115079 | 1.119839  |
| H | 5.028095 | 3.145374 | -0.007335 |
| C | 2.203339 | 3.993951 | 1.679811  |
| H | 0.485300 | 2.705282 | 1.913004  |
| H | 4.032443 | 5.039746 | 1.228128  |
| H | 1.768344 | 4.820841 | 2.229465  |

**TS-(3+2)-B2-3R5R**

|   |           |           |           |
|---|-----------|-----------|-----------|
| H | 0.245762  | -0.094119 | -1.388377 |
| P | 1.806167  | 0.233311  | 0.083123  |
| O | 0.791199  | 0.678262  | -1.021337 |
| O | 1.296682  | -0.478223 | 1.267031  |
| H | 7.554120  | 0.764219  | 1.960381  |
| H | 8.047690  | 0.366647  | 0.315245  |
| H | 6.952036  | -1.996369 | 2.239398  |
| C | 7.180835  | 0.595245  | 0.947186  |
| C | 6.137957  | -1.724090 | 1.574923  |
| H | 7.014534  | 2.570733  | -0.048154 |
| C | 6.385932  | 1.793224  | 0.394676  |
| C | 6.161911  | -0.519104 | 0.884987  |
| H | 5.799068  | 2.246137  | 1.200354  |
| C | 5.038387  | -2.568946 | 1.432491  |
| H | 4.996637  | -3.508086 | 1.976047  |
| H | 7.151766  | 0.628007  | -1.888834 |
| H | 6.859159  | 3.020000  | -2.376632 |
| C | 5.111394  | -0.159391 | 0.034744  |
| C | 5.405902  | 1.168835  | -0.640935 |
| C | 6.125826  | 0.987454  | -2.007488 |
| C | 6.029557  | 2.370011  | -2.680213 |
| C | 3.957373  | -2.216713 | 0.621273  |
| C | 4.015026  | -0.999709 | -0.070475 |
| C | 4.311862  | 2.146229  | -1.039172 |
| C | 4.714387  | 2.894401  | -2.150693 |
| H | 5.571428  | 0.251288  | -2.598572 |
| O | 2.588297  | 1.569209  | 0.527138  |
| H | 6.046149  | 2.313344  | -3.771628 |
| C | 3.069338  | 2.397261  | -0.480744 |
| C | 1.976476  | -3.276469 | 1.704077  |
| C | 2.725548  | -3.045582 | 0.548939  |
| C | 3.919000  | 3.920332  | -2.643991 |
| O | 2.907689  | -0.573844 | -0.797359 |
| C | 0.722687  | 3.692777  | 1.031249  |
| C | 2.243388  | 3.426503  | -0.952381 |
| H | 4.236051  | 4.499161  | -3.505890 |
| C | 2.696501  | 4.189922  | -2.031620 |
| C | 0.759396  | -3.942746 | 1.628988  |
| C | 2.245445  | -3.520047 | -0.671372 |
| C | -0.549455 | 3.844410  | 1.573505  |
| C | 0.900896  | 3.639111  | -0.354331 |
| H | 2.067734  | 4.994340  | -2.401742 |
| C | 0.279080  | -4.425917 | 0.416578  |
| C | 1.042651  | -4.219773 | -0.726657 |
| C | -1.671486 | 3.940735  | 0.758333  |

|   |           |           |           |
|---|-----------|-----------|-----------|
| C | -0.222314 | 3.750323  | -1.175158 |
| C | -1.488719 | 3.899269  | -0.619192 |
| C | -0.080448 | -4.025050 | 2.871795  |
| F | -1.177256 | -4.770604 | 2.691243  |
| F | -0.484573 | -2.800649 | 3.250051  |
| F | 0.604987  | -4.542234 | 3.899947  |
| C | 0.596730  | -4.779017 | -2.045746 |
| F | 0.736270  | -3.880408 | -3.034949 |
| F | -0.692527 | -5.153034 | -2.022362 |
| F | 1.315461  | -5.853765 | -2.397310 |
| H | 2.310237  | -2.861873 | 2.650277  |
| H | -0.677624 | -4.932754 | 0.361815  |
| H | 2.801852  | -3.327805 | -1.583702 |
| H | 1.580217  | 3.605245  | 1.690720  |
| H | -0.110596 | 3.673776  | -2.252692 |
| H | -2.662558 | 4.025536  | 1.188777  |
| C | -0.680338 | 3.898727  | 3.071404  |
| F | -0.267098 | 2.755498  | 3.642176  |
| F | -1.941346 | 4.111101  | 3.461591  |
| F | 0.077591  | 4.879015  | 3.586079  |
| C | -2.661406 | 4.026442  | -1.546577 |
| F | -2.685572 | 5.218561  | -2.158517 |
| F | -3.829997 | 3.879618  | -0.908537 |
| F | -2.613323 | 3.096826  | -2.519405 |
| C | -3.304003 | 0.466253  | 1.218223  |
| C | -4.744152 | 0.126081  | 1.151107  |
| C | -5.448611 | 0.189164  | 2.431421  |
| C | -4.897818 | 0.707518  | 3.551988  |
| C | -3.542815 | 1.193878  | 3.560637  |
| C | -2.797034 | 1.054371  | 2.443046  |
| H | -6.473395 | -0.156913 | 2.444794  |
| H | -5.490802 | 0.766765  | 4.459517  |
| H | -3.119806 | 1.640100  | 4.454051  |
| H | -1.751831 | 1.353319  | 2.440629  |
| C | -2.348276 | 0.322115  | 0.192606  |
| C | -5.456470 | -0.352373 | 0.079742  |
| H | -1.432575 | 0.901818  | 0.301319  |
| C | -1.380015 | -1.877127 | -1.042112 |
| O | -0.598315 | -1.338344 | -1.823138 |
| C | -1.459291 | -1.459948 | 0.361642  |
| H | -0.508775 | -1.254207 | 0.861431  |
| N | -2.307993 | -2.141734 | 1.187380  |
| N | -3.134564 | -1.998427 | 1.960099  |
| O | -2.290544 | -2.749232 | -1.425497 |
| C | -2.436421 | -2.901617 | -2.850628 |
| H | -3.199342 | -3.666396 | -2.977117 |
| H | -2.768549 | -1.954220 | -3.278909 |
| H | -1.491749 | -3.209546 | -3.293531 |
| H | -2.662507 | 0.210272  | -0.838194 |
| O | -6.670210 | -0.956363 | 0.369328  |
| H | -7.277396 | -0.770424 | -0.357546 |
| C | -5.153982 | -0.361918 | -1.360269 |
| C | -5.583558 | -1.449365 | -2.142404 |
| C | -4.603423 | 0.748991  | -2.018397 |
| C | -5.451306 | -1.430207 | -3.527265 |
| H | -6.021839 | -2.310679 | -1.647185 |
| C | -4.453039 | 0.757411  | -3.399168 |
| H | -4.321421 | 1.618107  | -1.434024 |

|   |           |           |           |
|---|-----------|-----------|-----------|
| C | -4.879770 | -0.330560 | -4.162887 |
| H | -5.790646 | -2.280915 | -4.111095 |
| H | -4.027091 | 1.631136  | -3.880435 |
| H | -4.778491 | -0.313172 | -5.243223 |

**TS-(3+2)-B2-3R5S**

|   |           |           |           |
|---|-----------|-----------|-----------|
| H | -0.917879 | 0.589727  | 1.909765  |
| P | -1.305708 | -0.938131 | 0.464596  |
| O | -1.625768 | -0.114933 | 1.751382  |
| O | 0.008071  | -0.756689 | -0.165443 |
| H | -4.028698 | -4.869740 | -3.404042 |
| H | -4.647442 | -5.680685 | -1.966616 |
| H | -1.541861 | -6.115832 | -2.750770 |
| C | -4.100249 | -4.796632 | -2.315847 |
| C | -1.567021 | -5.369458 | -1.962935 |
| H | -5.870675 | -3.548950 | -1.837339 |
| C | -4.778549 | -3.496157 | -1.845930 |
| C | -2.745945 | -4.704656 | -1.652718 |
| H | -4.482135 | -2.670644 | -2.501275 |
| C | -0.403229 | -5.043067 | -1.272491 |
| H | 0.525837  | -5.549775 | -1.515263 |
| H | -5.208016 | -5.075462 | 0.270645  |
| H | -7.033975 | -3.428983 | 0.212040  |
| C | -2.776992 | -3.757885 | -0.625731 |
| C | -4.190033 | -3.239059 | -0.427674 |
| C | -4.978250 | -4.067067 | 0.625833  |
| C | -6.227087 | -3.216850 | 0.923856  |
| C | -0.384696 | -4.051107 | -0.283774 |
| C | -1.604788 | -3.434057 | 0.038434  |
| C | -4.488402 | -1.828449 | 0.056133  |
| C | -5.706798 | -1.808893 | 0.745204  |
| H | -4.366671 | -4.153146 | 1.529784  |
| O | -2.493115 | -0.655122 | -0.609160 |
| H | -6.627688 | -3.386872 | 1.926471  |
| C | -3.784199 | -0.642090 | -0.091415 |
| C | 2.014280  | -3.446589 | -0.531444 |
| C | 0.900948  | -3.589232 | 0.300818  |
| C | -6.246901 | -0.618173 | 1.210560  |
| O | -1.653341 | -2.426800 | 0.994823  |
| C | -3.370660 | 2.425463  | -1.052671 |
| C | -4.310965 | 0.575196  | 0.359908  |
| H | -7.189152 | -0.611966 | 1.749566  |
| C | -5.551849 | 0.571238  | 0.999022  |
| C | 3.206814  | -2.922734 | -0.043209 |
| C | 1.020763  | -3.202279 | 1.640101  |
| C | -2.659049 | 3.616881  | -1.182529 |
| C | -3.536043 | 1.839191  | 0.202291  |
| H | -5.956716 | 1.513152  | 1.356567  |
| C | 3.316592  | -2.509248 | 1.276853  |
| C | 2.208225  | -2.650439 | 2.105211  |
| C | -2.072976 | 4.219887  | -0.077456 |
| C | -2.971881 | 2.461153  | 1.320655  |
| C | -2.233428 | 3.628239  | 1.172037  |
| C | 4.375763  | -2.786285 | -0.979012 |
| F | 5.343603  | -2.025439 | -0.467210 |
| F | 3.998228  | -2.247587 | -2.151918 |
| F | 4.909972  | -3.985335 | -1.266827 |
| C | 2.245254  | -2.066344 | 3.487090  |

|                         |           |           |           |   |           |           |           |
|-------------------------|-----------|-----------|-----------|---|-----------|-----------|-----------|
| F                       | 3.488078  | -2.008604 | 3.980596  | P | 1.357672  | -0.862600 | 0.346195  |
| F                       | 1.489945  | -2.755505 | 4.350194  | O | 1.193500  | 0.230878  | -0.760848 |
| F                       | 1.770330  | -0.800292 | 3.482203  | O | 0.679793  | -0.709558 | 1.639435  |
| H                       | 1.937524  | -3.699050 | -1.585091 | H | 4.467739  | -5.720104 | 2.036379  |
| H                       | 4.231855  | -2.049543 | 1.634971  | H | 4.141662  | -6.428956 | 0.455987  |
| H                       | 0.176056  | -3.295383 | 2.313111  | H | 1.757277  | -6.391289 | 2.612450  |
| H                       | -3.806619 | 1.956137  | -1.929229 | C | 4.042727  | -5.512880 | 1.050959  |
| H                       | -3.079668 | 2.004122  | 2.298156  | C | 1.578966  | -5.563317 | 1.933419  |
| H                       | -1.500740 | 5.135358  | -0.187474 | H | 5.621512  | -4.576487 | -0.194644 |
| C                       | -2.610529 | 4.320416  | -2.509701 | C | 4.710921  | -4.314737 | 0.351479  |
| F                       | -1.504539 | 5.069247  | -2.636364 | C | 2.597816  | -5.075865 | 1.126841  |
| F                       | -3.658810 | 5.140774  | -2.662821 | H | 4.964887  | -3.550826 | 1.093475  |
| F                       | -2.637501 | 3.460680  | -3.540826 | C | 0.322366  | -4.964806 | 1.871247  |
| C                       | -1.607635 | 4.302396  | 2.360018  | H | -0.490815 | -5.335697 | 2.487602  |
| F                       | -2.186423 | 5.484113  | 2.614436  | H | 3.701328  | -5.624553 | -1.751335 |
| F                       | -0.301949 | 4.557740  | 2.141897  | H | 5.654106  | -4.380752 | -2.578336 |
| F                       | -1.691096 | 3.564456  | 3.472345  | C | 2.372785  | -4.002629 | 0.259232  |
| C                       | 4.038298  | 0.829890  | -0.047938 | C | 3.607083  | -3.745470 | -0.584942 |
| C                       | 4.586888  | 0.862654  | -1.431697 | C | 3.572097  | -4.551141 | -1.915225 |
| C                       | 6.046350  | 0.858842  | -1.551174 | C | 4.679485  | -3.919391 | -2.778787 |
| C                       | 6.864484  | 0.891386  | -0.481893 | C | 0.083169  | -3.862413 | 1.046431  |
| C                       | 6.330771  | 0.927827  | 0.865235  | C | 1.132568  | -3.381052 | 0.257254  |
| C                       | 4.997885  | 0.907112  | 1.051869  | C | 3.970748  | -2.368709 | -1.108531 |
| H                       | 6.455937  | 0.833213  | -2.553248 | C | 4.663609  | -2.480299 | -2.318336 |
| H                       | 7.940498  | 0.884089  | -0.624713 | H | 2.599078  | -4.392844 | -2.391737 |
| H                       | 7.007742  | 0.958322  | 1.712493  | O | 2.957178  | -0.994753 | 0.568390  |
| H                       | 4.578243  | 0.909908  | 2.056601  | H | 4.490691  | -4.016825 | -3.851019 |
| C                       | 2.743462  | 0.426502  | 0.304512  | C | 3.753637  | -1.113533 | -0.563373 |
| C                       | 3.869409  | 1.029892  | -2.576419 | C | -1.719025 | -2.414046 | 2.037922  |
| H                       | 2.583373  | 0.168498  | 1.349168  | C | -1.276028 | -3.248586 | 1.008690  |
| C                       | 1.099366  | 2.188424  | 1.701102  | C | 5.192563  | -1.357018 | -2.938511 |
| O                       | 0.132616  | 1.639120  | 2.215090  | O | 0.961228  | -2.211631 | -0.479390 |
| C                       | 1.470802  | 2.083698  | 0.281323  | C | 4.175480  | 1.617184  | 0.787582  |
| H                       | 0.696092  | 1.847100  | -0.443255 | C | 4.279908  | 0.039618  | -1.163844 |
| N                       | 2.388877  | 3.010555  | -0.103849 | H | 5.734953  | -1.443920 | -3.874797 |
| N                       | 3.517219  | 3.161559  | -0.229463 | C | 5.011728  | -0.109750 | -2.346752 |
| O                       | 1.988404  | 2.850382  | 2.424049  | C | -3.025582 | -1.937214 | 2.027284  |
| C                       | 1.754711  | 2.851521  | 3.839001  | C | -2.150886 | -3.575957 | -0.028423 |
| H                       | 2.554206  | 3.455649  | 4.261319  | C | 4.002129  | 2.899404  | 1.303753  |
| H                       | 0.777983  | 3.285759  | 4.052569  | C | 4.055996  | 1.386421  | -0.584033 |
| H                       | 1.793915  | 1.828553  | 4.217490  | H | 5.438445  | 0.775144  | -2.809323 |
| H                       | 2.103405  | -0.122567 | -0.369565 | C | -3.909107 | -2.283347 | 1.010504  |
| O                       | 4.565321  | 1.247756  | -3.747794 | C | -3.457902 | -3.096641 | -0.020853 |
| H                       | 3.968828  | 1.075250  | -4.484431 | C | 3.710473  | 3.972954  | 0.475026  |
| C                       | 2.399550  | 1.134815  | -2.755904 | C | 3.742809  | 2.465383  | -1.418929 |
| C                       | 1.848887  | 2.374548  | -3.122764 | C | 3.577770  | 3.738672  | -0.891681 |
| C                       | 1.561042  | 0.020536  | -2.671921 | C | -3.527190 | -1.059899 | 3.139728  |
| C                       | 0.481915  | 2.501708  | -3.345931 | F | -4.231410 | -1.758398 | 4.040990  |
| H                       | 2.505019  | 3.236918  | -3.206840 | F | -4.340083 | -0.098433 | 2.670828  |
| C                       | 0.194266  | 0.146620  | -2.904260 | F | -2.527899 | -0.456546 | 3.798858  |
| H                       | 1.985475  | -0.942840 | -2.406584 | C | -4.428956 | -3.492268 | -1.096012 |
| C                       | -0.347952 | 1.384291  | -3.232012 | F | -3.816273 | -4.114847 | -2.119372 |
| H                       | 0.061212  | 3.466911  | -3.607259 | F | -5.074384 | -2.432380 | -1.601912 |
| H                       | -0.448147 | -0.720601 | -2.798969 | F | -5.364491 | -4.329323 | -0.627925 |
| H                       | -1.413914 | 1.481145  | -3.403086 | H | -1.028345 | -2.115612 | 2.818118  |
|                         |           |           |           | H | -4.921752 | -1.891053 | 1.002851  |
|                         |           |           |           | H | -1.815352 | -4.223645 | -0.831835 |
|                         |           |           |           | H | 4.407461  | 0.796106  | 1.458021  |
| <b>TS-(3+2)-B2-3S5R</b> |           |           |           |   |           |           |           |
| H                       | 0.514916  | 0.004220  | -1.481283 |   |           |           |           |



|                         |           |           |           |   |           |           |           |
|-------------------------|-----------|-----------|-----------|---|-----------|-----------|-----------|
| H                       | 3.612124  | 2.303607  | -2.483904 | C | 3.409479  | -4.749384 | 2.076314  |
| H                       | 3.580615  | 4.968944  | 0.883133  | H | 6.985180  | -1.754622 | 1.771894  |
| C                       | 4.148551  | 3.091006  | 2.787740  | C | 5.927100  | -2.020236 | 1.847591  |
| F                       | 3.283174  | 2.319107  | 3.462275  | C | 4.320209  | -3.763886 | 1.720584  |
| F                       | 3.933754  | 4.359596  | 3.154742  | H | 5.450818  | -1.330983 | 2.552409  |
| F                       | 5.376553  | 2.749610  | 3.204115  | C | 2.161367  | -4.775394 | 1.458399  |
| C                       | 3.156692  | 4.871876  | -1.783464 | H | 1.438961  | -5.541230 | 1.724486  |
| F                       | 3.507707  | 4.663928  | -3.058470 | H | 6.650584  | -3.361880 | -0.348068 |
| F                       | 3.695090  | 6.033930  | -1.392583 | H | 7.912231  | -1.249723 | -0.361756 |
| F                       | 1.821025  | 5.035496  | -1.764027 | C | 4.005197  | -2.820666 | 0.737091  |
| C                       | -3.961586 | 2.594253  | -1.624110 | C | 5.194638  | -1.913825 | 0.479279  |
| C                       | -4.338177 | 3.539440  | -0.535053 | C | 6.109535  | -2.461972 | -0.653146 |
| C                       | -5.687653 | 4.104997  | -0.599795 | C | 7.028621  | -1.279223 | -1.010839 |
| C                       | -6.578162 | 3.756627  | -1.547371 | C | 1.798516  | -3.814389 | 0.509870  |
| C                       | -6.233600 | 2.792617  | -2.574461 | C | 2.743962  | -2.838743 | 0.164480  |
| C                       | -5.001196 | 2.256057  | -2.598140 | C | 5.037317  | -0.472572 | 0.027541  |
| H                       | -5.954803 | 4.823043  | 0.165572  | C | 6.132632  | -0.090213 | -0.753243 |
| H                       | -7.567436 | 4.202955  | -1.550223 | H | 5.483985  | -2.714841 | -1.515340 |
| H                       | -6.967152 | 2.522062  | -3.326452 | O | 2.888996  | 0.036043  | 0.952523  |
| H                       | -4.721742 | 1.545313  | -3.372647 | H | 7.386467  | -1.315390 | -2.042934 |
| C                       | -2.650415 | 2.239522  | -1.982285 | C | 4.031092  | 0.446730  | 0.279393  |
| C                       | -3.603685 | 3.807471  | 0.579538  | C | -0.683891 | -3.920680 | 0.753967  |
| H                       | -1.801545 | 2.825638  | -1.662228 | C | 0.434935  | -3.793395 | -0.075415 |
| C                       | -1.755635 | -0.369838 | -1.889750 | C | 6.255627  | 1.213880  | -1.212819 |
| O                       | -0.635636 | -0.452192 | -2.385908 | O | 2.374517  | -1.807965 | -0.697457 |
| C                       | -2.087911 | 0.580633  | -0.821612 | C | 2.342782  | 2.846948  | 1.247831  |
| H                       | -1.287076 | 0.889504  | -0.152674 | C | 4.116804  | 1.766464  | -0.187660 |
| N                       | -3.289543 | 0.374307  | -0.221687 | H | 7.110633  | 1.512543  | -1.811152 |
| N                       | -4.371914 | 0.754180  | -0.246837 | C | 5.254371  | 2.133897  | -0.914849 |
| O                       | -2.800182 | -1.017356 | -2.378117 | C | -1.962165 | -3.902595 | 0.212893  |
| C                       | -2.546593 | -1.831023 | -3.531605 | C | 0.241122  | -3.644889 | -1.449101 |
| H                       | -3.507057 | -2.270355 | -3.786367 | C | 1.332461  | 3.788015  | 1.411484  |
| H                       | -2.161227 | -1.212098 | -4.343313 | C | 3.014777  | 2.738221  | 0.023397  |
| H                       | -1.818781 | -2.606492 | -3.286863 | H | 5.342330  | 3.158991  | -1.261947 |
| H                       | -2.533092 | 1.788714  | -2.965660 | C | -2.157932 | -3.756508 | -1.157901 |
| O                       | -4.190496 | 4.550275  | 1.577138  | C | -1.046306 | -3.627858 | -1.979226 |
| H                       | -3.506879 | 4.794214  | 2.210734  | C | 0.968299  | 4.644683  | 0.376693  |
| C                       | -2.252790 | 3.307538  | 0.936115  | C | 2.628570  | 3.579260  | -1.022792 |
| C                       | -1.097665 | 3.819091  | 0.336831  | C | 1.621759  | 4.521662  | -0.841566 |
| C                       | -2.127207 | 2.345051  | 1.950661  | C | -3.168115 | -4.090610 | 1.090332  |
| C                       | 0.156855  | 3.332887  | 0.694875  | F | -4.131826 | -3.205347 | 0.799280  |
| H                       | -1.189250 | 4.590956  | -0.422665 | F | -2.868713 | -3.960518 | 2.389601  |
| C                       | -0.872361 | 1.857384  | 2.304008  | F | -3.701423 | -5.310979 | 0.925410  |
| H                       | -3.022572 | 1.952160  | 2.424998  | C | -1.213961 | -3.441294 | -3.461308 |
| C                       | 0.270550  | 2.347198  | 1.671527  | F | -2.410822 | -3.882667 | -3.885579 |
| H                       | 1.040313  | 3.718658  | 0.199656  | F | -0.273485 | -4.102500 | -4.148991 |
| H                       | -0.779364 | 1.069058  | 3.041276  | F | -1.123752 | -2.151584 | -3.816282 |
| H                       | 1.243313  | 1.951109  | 1.943874  | H | -0.552684 | -4.002988 | 1.827620  |
| <b>TS-(3+2)-B2-3S5S</b> |           |           |           | H | -3.160288 | -3.756089 | -1.573566 |
| H                       | 0.657840  | 1.000639  | -1.041326 | H | 1.095934  | -3.547035 | -2.109918 |
| P                       | 1.673425  | -0.559729 | 0.054464  | H | 2.607874  | 2.194864  | 2.072734  |
| O                       | 1.459020  | 0.399602  | -1.156850 | H | 3.104180  | 3.482992  | -1.994224 |
| O                       | 0.532896  | -0.864148 | 0.933438  | H | 0.183674  | 5.379504  | 0.518987  |
| H                       | 5.708469  | -3.587295 | 3.387827  | C | 0.660645  | 3.927031  | 2.749810  |
| H                       | 6.439439  | -4.151064 | 1.886149  | F | -0.576993 | 4.425695  | 2.624518  |
| H                       | 3.655507  | -5.480611 | 2.839964  | F | 1.340012  | 4.747244  | 3.561931  |
| C                       | 5.684680  | -3.472100 | 2.301224  | F | 0.564224  | 2.744170  | 3.377064  |
|                         |           |           |           | C | 1.218900  | 5.365030  | -2.017628 |

|                           |           |           |           |   |           |           |           |
|---------------------------|-----------|-----------|-----------|---|-----------|-----------|-----------|
| F                         | 2.280610  | 5.919026  | -2.616098 | H | -6.690336 | -2.382110 | -0.082051 |
| F                         | 0.386525  | 6.356484  | -1.661074 | H | -7.666622 | -0.157522 | 0.266177  |
| F                         | 0.584115  | 4.632812  | -2.945793 | C | -3.949169 | -2.067101 | -0.937274 |
| C                         | -3.718754 | -0.132947 | 1.602498  | C | -4.991290 | -1.042512 | -0.538890 |
| C                         | -4.971248 | 0.553363  | 1.208580  | C | -6.060091 | -1.640528 | 0.416852  |
| C                         | -5.912800 | 0.802166  | 2.297792  | C | -6.836417 | -0.416572 | 0.934407  |
| C                         | -5.816206 | 0.158165  | 3.482280  | C | -1.927084 | -3.417988 | -0.817844 |
| C                         | -4.740217 | -0.766918 | 3.746094  | C | -2.757279 | -2.402659 | -0.322533 |
| C                         | -3.739125 | -0.886801 | 2.846752  | C | -4.661472 | 0.251970  | 0.194225  |
| H                         | -6.746005 | 1.464361  | 2.097254  | C | -5.780287 | 0.665278  | 0.927183  |
| H                         | -6.572143 | 0.322107  | 4.244360  | H | -5.545709 | -2.132846 | 1.248595  |
| H                         | -4.727118 | -1.333184 | 4.671000  | O | -2.360804 | 0.618754  | -0.426670 |
| H                         | -2.892991 | -1.540379 | 3.042132  | H | -7.261531 | -0.573188 | 1.929492  |
| C                         | -2.540245 | -0.177613 | 0.834888  | C | -3.534410 | 1.066599  | 0.175855  |
| C                         | -5.278706 | 1.023467  | -0.034503 | C | 0.515604  | -3.821366 | -1.050992 |
| H                         | -2.557390 | 0.026240  | -0.229065 | C | -0.596291 | -3.691748 | -0.216908 |
| C                         | -1.294800 | 2.260090  | 0.059542  | C | -5.816145 | 1.912528  | 1.533627  |
| O                         | -0.527592 | 2.001447  | -0.859536 | O | -2.351772 | -1.632107 | 0.764758  |
| C                         | -1.404799 | 1.443639  | 1.282345  | C | -2.540034 | 4.321999  | -0.376589 |
| H                         | -0.487632 | 0.972786  | 1.626295  | C | -3.556341 | 2.349679  | 0.740833  |
| N                         | -2.141328 | 2.008743  | 2.283344  | H | -6.688594 | 2.228973  | 2.097313  |
| N                         | -3.107129 | 1.875101  | 2.878484  | C | -4.717905 | 2.758706  | 1.401854  |
| O                         | -2.173822 | 3.247526  | -0.003639 | C | 1.794425  | -4.011631 | -0.526854 |
| C                         | -2.198174 | 3.999753  | -1.224169 | C | -0.418642 | -3.761407 | 1.168878  |
| H                         | -3.113528 | 4.586382  | -1.179388 | C | -1.526752 | 5.268206  | -0.553915 |
| H                         | -1.329758 | 4.656480  | -1.277630 | C | -2.422205 | 3.310248  | 0.577890  |
| H                         | -2.200865 | 3.326736  | -2.081798 | H | -4.735378 | 3.752100  | 1.839420  |
| H                         | -1.787516 | -0.909578 | 1.117488  | C | 1.942033  | -4.078777 | 0.858957  |
| O                         | -6.297263 | 1.953107  | -0.132047 | C | 0.848091  | -3.951533 | 1.717870  |
| H                         | -6.745462 | 1.818944  | -0.976252 | C | -0.380067 | 5.171178  | 0.231116  |
| C                         | -4.672698 | 0.672048  | -1.331534 | C | -1.268545 | 3.248617  | 1.364522  |
| C                         | -4.390818 | -0.660889 | -1.673534 | C | -0.232043 | 4.162844  | 1.185089  |
| C                         | -4.479339 | 1.666110  | -2.299706 | C | 2.991437  | -4.078926 | -1.442552 |
| C                         | -3.887286 | -0.973755 | -2.926927 | C | 1.038547  | -4.036245 | 3.211567  |
| H                         | -4.560970 | -1.438028 | -0.933165 | H | 0.387985  | -3.718200 | -2.125771 |
| C                         | -3.963495 | 1.349653  | -3.555574 | H | 2.936121  | -4.213965 | 1.281731  |
| H                         | -4.729054 | 2.693934  | -2.050744 | H | -1.277723 | -3.653442 | 1.824614  |
| C                         | -3.658392 | 0.030549  | -3.870394 | H | -3.433988 | 4.366494  | -0.994081 |
| H                         | -3.684123 | -2.006028 | -3.189812 | H | -1.184103 | 2.474692  | 2.117899  |
| H                         | -3.803295 | 2.136222  | -4.287047 | H | 0.435322  | 5.874244  | 0.071151  |
| H                         | -3.251253 | -0.224024 | -4.843203 | C | -1.674255 | 6.368408  | -1.574183 |
| <b>TS-(3+2)-B4-1R2S5R</b> |           |           |           | C | 1.051741  | 4.039831  | 1.966719  |
| H                         | -0.225295 | 0.311731  | 2.012192  | C | 5.082326  | 0.477260  | -0.448034 |
| P                         | -1.397115 | -0.391280 | 0.383654  | C | 5.097484  | -0.114265 | -1.800160 |
| O                         | -1.187960 | 0.210957  | 1.825702  | C | 6.412084  | -0.551918 | -2.260333 |
| O                         | -0.189678 | -0.693267 | -0.398022 | C | 7.544764  | -0.344830 | -1.552314 |
| H                         | -5.549846 | -1.995325 | -3.753909 | C | 7.515795  | 0.328475  | -0.279394 |
| H                         | -6.465918 | -2.718738 | -2.432892 | C | 6.326369  | 0.708612  | 0.246166  |
| H                         | -3.838048 | -4.282586 | -3.518704 | H | 6.452651  | -1.046521 | -3.227087 |
| C                         | -5.586069 | -2.106828 | -2.667069 | H | 8.497258  | -0.679610 | -1.952773 |
| C                         | -3.547213 | -3.760828 | -2.611965 | H | 8.442145  | 0.528710  | 0.247383  |
| H                         | -6.639418 | -0.336299 | -1.841643 | H | 6.276560  | 1.219003  | 1.201155  |
| C                         | -5.632783 | -0.754583 | -1.929009 | C | 3.868575  | 1.002592  | 0.102869  |
| C                         | -4.328468 | -2.729984 | -2.106700 | C | 4.004090  | -0.369977 | -2.565749 |
| H                         | -5.005803 | -0.027864 | -2.455762 | H | 2.999674  | -0.058063 | -2.310914 |
| C                         | -2.364007 | -4.101296 | -1.958970 | C | 2.322204  | -0.473495 | 1.884573  |
| H                         | -1.740239 | -4.899694 | -2.349362 | O | 1.448576  | 0.327816  | 2.185651  |
|                           |           |           |           | C | 2.782736  | -0.698069 | 0.494086  |

|   |           |           |           |
|---|-----------|-----------|-----------|
| H | 1.983424  | -0.861605 | -0.232421 |
| N | 3.773689  | -1.655625 | 0.454579  |
| N | 4.889894  | -1.779397 | 0.266312  |
| O | 3.021936  | -1.134460 | 2.796853  |
| C | 2.731377  | -0.798388 | 4.157385  |
| H | 3.390577  | -1.421315 | 4.757845  |
| H | 2.936148  | 0.260103  | 4.327111  |
| H | 1.685058  | -1.010376 | 4.383571  |
| O | 4.008083  | 1.527076  | 1.382240  |
| H | 3.237453  | 2.086623  | 1.551497  |
| H | 4.131511  | -0.877054 | -3.516636 |
| C | 2.970405  | 1.851827  | -0.767929 |
| C | 1.579291  | 1.844538  | -0.666918 |
| C | 3.582071  | 2.765655  | -1.636877 |
| C | 0.805114  | 2.691177  | -1.457665 |
| H | 1.082584  | 1.162226  | 0.009229  |
| C | 2.810789  | 3.628634  | -2.405551 |
| H | 4.664683  | 2.778241  | -1.713931 |
| C | 1.419114  | 3.586308  | -2.325753 |
| H | -0.277940 | 2.649922  | -1.375338 |
| H | 3.298255  | 4.328511  | -3.076890 |
| H | 0.815268  | 4.251978  | -2.935467 |
| H | 2.810816  | -4.762199 | -2.277000 |
| H | 3.217070  | -3.093357 | -1.869764 |
| H | 3.882076  | -4.417860 | -0.907854 |
| H | 2.017893  | -3.643764 | 3.499836  |
| H | 0.982973  | -5.073008 | 3.559404  |
| H | 0.267067  | -3.469993 | 3.740535  |
| H | -2.241774 | 6.028120  | -2.443954 |
| H | -0.698354 | 6.720705  | -1.917386 |
| H | -2.205199 | 7.227103  | -1.150152 |
| H | 1.910358  | 4.156842  | 1.295210  |
| H | 1.118365  | 3.060913  | 2.451977  |
| H | 1.129899  | 4.809169  | 2.741671  |

**TS-(3+2)-B4-1R2S5S**

|   |           |           |           |
|---|-----------|-----------|-----------|
| H | -0.250672 | 1.331727  | 1.294637  |
| P | -1.377861 | -0.099664 | 0.105236  |
| O | -1.075143 | 0.771133  | 1.370694  |
| O | -0.235090 | -0.586779 | -0.693200 |
| H | -5.550329 | -2.216670 | -3.679047 |
| H | -6.499526 | -2.685725 | -2.269565 |
| H | -3.917997 | -4.461477 | -3.067992 |
| C | -5.600930 | -2.143891 | -2.589529 |
| C | -3.618075 | -3.818790 | -2.245786 |
| H | -6.612645 | -0.235073 | -2.084175 |
| C | -5.617421 | -0.688614 | -2.087574 |
| C | -4.367475 | -2.698486 | -1.915370 |
| H | -4.964790 | -0.075612 | -2.717724 |
| C | -2.461994 | -4.100470 | -1.521853 |
| H | -1.866523 | -4.975825 | -1.762342 |
| H | -6.760060 | -1.935827 | -0.014402 |
| H | -7.624072 | 0.365728  | -0.018260 |
| C | -3.977589 | -1.865416 | -0.861842 |
| C | -4.999992 | -0.760311 | -0.661293 |
| C | -6.095274 | -1.156760 | 0.369149  |
| C | -6.815007 | 0.165763  | 0.694898  |
| C | -2.019959 | -3.266192 | -0.489372 |

|   |           |           |           |
|---|-----------|-----------|-----------|
| C | -2.801388 | -2.143874 | -0.183322 |
| C | -4.628019 | 0.618541  | -0.145414 |
| C | -5.703762 | 1.179500  | 0.547924  |
| H | -5.603615 | -1.539843 | 1.269285  |
| O | -2.355189 | 0.732963  | -0.871768 |
| H | -7.257061 | 0.173479  | 1.694726  |
| C | -3.459332 | 1.349445  | -0.289761 |
| C | 0.415209  | -3.836379 | -0.472754 |
| C | -0.758453 | -3.568699 | 0.236552  |
| C | -5.633294 | 2.483015  | 1.019887  |
| O | -2.332714 | -1.216695 | 0.756773  |
| C | -1.291853 | 3.410101  | -1.083893 |
| C | -3.344938 | 2.662937  | 0.187321  |
| H | -6.471291 | 2.926749  | 1.548820  |
| C | -4.466473 | 3.215572  | 0.819319  |
| C | 1.596122  | -4.175238 | 0.193655  |
| C | -0.743661 | -3.631770 | 1.632489  |
| C | -0.147338 | 4.197276  | -1.193035 |
| C | -2.084550 | 3.444256  | 0.073280  |
| H | -4.407624 | 4.241137  | 1.169804  |
| C | 1.572805  | -4.259033 | 1.585203  |
| C | 0.415593  | -3.990241 | 2.317532  |
| C | 0.202948  | 5.029971  | -0.125524 |
| C | -1.689833 | 4.264081  | 1.132533  |
| C | -0.552989 | 5.069616  | 1.043222  |
| C | 2.867052  | -4.429218 | -0.575291 |
| C | 0.409510  | -4.104858 | 3.820377  |
| H | 0.412411  | -3.752008 | -1.557841 |
| H | 2.487609  | -4.514994 | 2.114991  |
| H | -1.653961 | -3.413849 | 2.185439  |
| H | -1.583691 | 2.776153  | -1.915136 |
| H | -2.271954 | 4.265055  | 2.050767  |
| H | 1.091952  | 5.653177  | -0.210870 |
| C | 0.685658  | 4.188978  | -2.449594 |
| C | -0.157392 | 5.948256  | 2.203434  |
| C | 4.415440  | -0.288915 | -1.270471 |
| C | 5.467084  | 0.504651  | -0.592338 |
| C | 6.732053  | 0.605601  | -1.319125 |
| C | 6.979335  | -0.079847 | -2.453938 |
| C | 5.988508  | -0.966710 | -3.021998 |
| C | 4.767938  | -1.060295 | -2.453143 |
| H | 7.494310  | 1.248986  | -0.887967 |
| H | 7.943336  | 0.018690  | -2.944212 |
| H | 6.234646  | -1.555385 | -3.898855 |
| H | 4.006203  | -1.711687 | -2.865451 |
| C | 3.166477  | -0.583567 | -0.624504 |
| C | 5.304151  | 1.202426  | 0.554880  |
| H | 4.406153  | 1.156073  | 1.157465  |
| C | 2.008679  | 2.260562  | 0.337486  |
| O | 1.179857  | 2.138022  | 1.229837  |
| C | 2.164895  | 1.305403  | -0.778308 |
| H | 1.223495  | 0.873618  | -1.117191 |
| N | 2.903532  | 1.794599  | -1.843292 |
| N | 3.820170  | 1.470731  | -2.453867 |
| O | 2.907920  | 3.239908  | 0.333411  |
| C | 2.980934  | 4.024571  | 1.525700  |
| H | 3.649940  | 4.850660  | 1.292318  |
| H | 1.991222  | 4.385021  | 1.805491  |

|   |           |           |           |
|---|-----------|-----------|-----------|
| H | 3.393020  | 3.417574  | 2.335718  |
| O | 2.305299  | -1.285853 | -1.422031 |
| H | 1.449477  | -1.405453 | -0.968824 |
| H | 6.112557  | 1.825431  | 0.923456  |
| C | 3.138069  | -0.978599 | 0.831297  |
| C | 4.224264  | -1.686117 | 1.364988  |
| C | 2.022604  | -0.762382 | 1.637249  |
| C | 4.212054  | -2.101721 | 2.691022  |
| H | 5.086925  | -1.887312 | 0.737968  |
| C | 2.011881  | -1.168176 | 2.968954  |
| H | 1.159302  | -0.266223 | 1.223103  |
| C | 3.113240  | -1.825591 | 3.504750  |
| H | 5.067235  | -2.636415 | 3.092515  |
| H | 1.134399  | -0.969843 | 3.576970  |
| H | 3.113631  | -2.133453 | 4.546122  |
| H | -0.977956 | 6.610877  | 2.493017  |
| H | 0.705640  | 6.570697  | 1.954012  |
| H | 0.098650  | 5.345848  | 3.081506  |
| H | 0.422537  | 5.032601  | -3.096216 |
| H | 1.750235  | 4.269992  | -2.212660 |
| H | 0.534022  | 3.270124  | -3.021177 |
| H | 1.427762  | -4.123893 | 4.215617  |
| H | -0.120213 | -3.264438 | 4.278316  |
| H | -0.093473 | -5.023233 | 4.140731  |
| H | 3.680188  | -4.714102 | 0.096370  |
| H | 2.730971  | -5.229764 | -1.308955 |
| H | 3.169022  | -3.527401 | -1.116851 |

**TS-(3+2)-B4-1S2R5R**

|   |           |           |           |
|---|-----------|-----------|-----------|
| H | -0.246267 | 0.574303  | 1.799786  |
| P | -1.284071 | -0.266721 | 0.085669  |
| O | -1.119589 | 0.670780  | 1.331233  |
| O | -0.112160 | -0.502213 | -0.779610 |
| H | -5.253336 | -3.210951 | -3.367754 |
| H | -5.906462 | -3.934592 | -1.899363 |
| H | -3.102949 | -5.074655 | -3.015164 |
| C | -5.196386 | -3.188240 | -2.276289 |
| C | -2.866738 | -4.390070 | -2.206190 |
| H | -6.552652 | -1.588002 | -1.552053 |
| C | -5.487546 | -1.793154 | -1.691698 |
| C | -3.801828 | -3.464866 | -1.764005 |
| H | -5.076085 | -1.024097 | -2.353543 |
| C | -1.611887 | -4.424209 | -1.603587 |
| H | -0.875165 | -5.154012 | -1.924618 |
| H | -6.035158 | -3.349054 | 0.417398  |
| H | -7.421554 | -1.334932 | 0.650718  |
| C | -3.489584 | -2.587197 | -0.722632 |
| C | -4.701102 | -1.759565 | -0.349222 |
| C | -5.535138 | -2.442774 | 0.770525  |
| C | -6.503375 | -1.347442 | 1.250719  |
| C | -1.252592 | -3.526058 | -0.590850 |
| C | -2.218774 | -2.602725 | -0.173429 |
| C | -4.603148 | -0.346469 | 0.199310  |
| C | -5.699679 | -0.087412 | 1.028459  |
| H | -4.858808 | -2.721281 | 1.585291  |
| O | -2.510152 | 0.361908  | -0.743048 |
| H | -6.802546 | -1.472036 | 2.294887  |
| C | -3.684636 | 0.664641  | -0.047296 |

|   |           |           |           |
|---|-----------|-----------|-----------|
| C | 1.216629  | -3.708256 | -0.839465 |
| C | 0.109020  | -3.576273 | -0.003481 |
| C | -5.917265 | 1.184815  | 1.535663  |
| O | -1.889065 | -1.610243 | 0.752785  |
| C | -2.568097 | 3.293800  | -1.256236 |
| C | -3.896441 | 1.972817  | 0.413593  |
| H | -6.770391 | 1.388619  | 2.175668  |
| C | -5.033562 | 2.204706  | 1.198392  |
| C | 2.501118  | -3.876283 | -0.315100 |
| C | 0.299805  | -3.551042 | 1.385210  |
| C | -1.900550 | 4.459284  | -1.636714 |
| C | -3.019288 | 3.118026  | 0.054923  |
| H | -5.220146 | 3.216678  | 1.543121  |
| C | 2.652688  | -3.914540 | 1.068830  |
| C | 1.568988  | -3.717791 | 1.931258  |
| C | -1.692916 | 5.454997  | -0.682480 |
| C | -2.746357 | 4.111610  | 1.002949  |
| C | -2.085529 | 5.285896  | 0.647260  |
| C | 3.691292  | -3.946166 | -1.234107 |
| C | 1.797088  | -3.661032 | 3.420268  |
| H | 1.078993  | -3.662185 | -1.916972 |
| H | 3.647091  | -4.051132 | 1.489488  |
| H | -0.557281 | -3.418750 | 2.039420  |
| H | -2.763917 | 2.524227  | -1.996897 |
| H | -3.061095 | 3.964934  | 2.032990  |
| H | -1.197776 | 6.379176  | -0.976716 |
| C | -1.380181 | 4.620136  | -3.040608 |
| C | -1.771342 | 6.343082  | 1.675085  |
| C | 4.644051  | 0.218430  | -0.977078 |
| C | 5.560437  | 1.031194  | -0.143675 |
| C | 6.983879  | 0.814189  | -0.398792 |
| C | 7.436357  | 0.038296  | -1.404899 |
| C | 6.520089  | -0.616122 | -2.312624 |
| C | 5.189326  | -0.521267 | -2.105122 |
| H | 7.682481  | 1.328542  | 0.255681  |
| H | 8.505192  | -0.078678 | -1.557387 |
| H | 6.907681  | -1.159446 | -3.167480 |
| H | 4.481099  | -0.976219 | -2.788293 |
| C | 3.223631  | 0.410381  | -0.924136 |
| C | 5.183211  | 1.831113  | 0.879445  |
| H | 5.940161  | 2.310457  | 1.491419  |
| C | 2.360282  | 0.090244  | 2.226305  |
| O | 1.241183  | 0.501079  | 2.503870  |
| C | 2.727555  | -0.537057 | 0.937902  |
| H | 1.907080  | -1.117186 | 0.506789  |
| N | 3.872349  | -1.312785 | 1.023905  |
| N | 4.848119  | -1.453563 | 0.437294  |
| O | 3.374823  | 0.201584  | 3.077334  |
| C | 3.082527  | 0.870429  | 4.306702  |
| H | 4.014083  | 0.866441  | 4.867927  |
| H | 2.753659  | 1.891979  | 4.108154  |
| H | 2.298319  | 0.339366  | 4.849314  |
| O | 2.528398  | -0.459540 | -1.718141 |
| H | 1.569152  | -0.319541 | -1.602076 |
| H | 4.149836  | 2.043021  | 1.120527  |
| C | 2.661097  | 1.806477  | -0.868475 |
| C | 1.477443  | 2.105184  | -0.201581 |
| C | 3.288533  | 2.814741  | -1.610414 |

|   |           |           |           |
|---|-----------|-----------|-----------|
| C | 0.927188  | 3.381321  | -0.242038 |
| H | 0.977693  | 1.328186  | 0.349339  |
| C | 2.743479  | 4.092955  | -1.656742 |
| H | 4.208360  | 2.590949  | -2.141355 |
| C | 1.564736  | 4.381634  | -0.969304 |
| H | 0.001454  | 3.579807  | 0.290020  |
| H | 3.241884  | 4.866829  | -2.231985 |
| H | 1.139031  | 5.380374  | -1.005515 |
| H | 3.524534  | -4.654472 | -2.050455 |
| H | 4.596161  | -4.239125 | -0.697296 |
| H | 3.869918  | -2.961076 | -1.679867 |
| H | 2.476518  | -2.837996 | 3.670586  |
| H | 2.257712  | -4.582925 | 3.787418  |
| H | 0.861195  | -3.507218 | 3.961474  |
| H | -1.332996 | 5.673308  | -3.328887 |
| H | -2.007729 | 4.091745  | -3.762026 |
| H | -0.367386 | 4.207661  | -3.112170 |
| H | -0.713838 | 6.305889  | 1.957230  |
| H | -1.971257 | 7.344592  | 1.284776  |
| H | -2.363235 | 6.204547  | 2.582450  |

**TS-(3+2)-B4-1S2R5S**

|   |           |           |           |
|---|-----------|-----------|-----------|
| H | -0.217704 | -0.976623 | -1.272721 |
| P | -1.742732 | 0.066194  | -0.213696 |
| O | -1.177725 | -0.795266 | -1.405411 |
| O | -0.855443 | 1.017073  | 0.466289  |
| H | -6.662780 | 0.740887  | 3.278993  |
| H | -7.627159 | 0.643633  | 1.806619  |
| H | -6.019682 | 3.379742  | 2.420118  |
| C | -6.610140 | 0.542235  | 2.205266  |
| C | -5.433957 | 2.825767  | 1.692679  |
| H | -6.751217 | -1.653163 | 1.915941  |
| C | -6.018476 | -0.841887 | 1.881466  |
| C | -5.654535 | 1.470223  | 1.491586  |
| H | -5.218058 | -1.073957 | 2.591575  |
| C | -4.434705 | 3.465503  | 0.963607  |
| H | -4.251606 | 4.526238  | 1.105884  |
| H | -7.424442 | -0.367457 | -0.345262 |
| H | -7.319143 | -2.808346 | -0.073032 |
| C | -4.899774 | 0.757847  | 0.555027  |
| C | -5.389345 | -0.676573 | 0.467736  |
| C | -6.485507 | -0.856261 | -0.620192 |
| C | -6.609516 | -2.381970 | -0.792693 |
| C | -3.628137 | 2.771848  | 0.054182  |
| C | -3.884093 | 1.405640  | -0.131019 |
| C | -4.474009 | -1.839644 | 0.126368  |
| C | -5.201972 | -2.852088 | -0.505893 |
| H | -6.126537 | -0.407820 | -1.552264 |
| O | -2.376678 | -0.965210 | 0.868688  |
| H | -6.949845 | -2.670713 | -1.790719 |
| C | -3.121867 | -2.025202 | 0.370349  |
| C | -1.645325 | 4.284945  | 0.070967  |
| C | -2.514781 | 3.458387  | -0.649202 |
| C | -4.602610 | -4.065275 | -0.813635 |
| O | -3.051179 | 0.652673  | -0.957011 |
| C | -0.414417 | -2.984978 | 1.478931  |
| C | -2.482692 | -3.238215 | 0.067230  |
| H | -5.168534 | -4.856766 | -1.295535 |

|   |           |           |           |
|---|-----------|-----------|-----------|
| C | -3.257747 | -4.253683 | -0.505655 |
| C | -0.593049 | 4.942079  | -0.558629 |
| C | -2.319277 | 3.297259  | -2.020298 |
| C | 0.934894  | -3.243650 | 1.733734  |
| C | -1.032136 | -3.450460 | 0.316391  |
| H | -2.784218 | -5.206479 | -0.721354 |
| C | -0.422801 | 4.765983  | -1.935020 |
| C | -1.274816 | 3.951826  | -2.676957 |
| C | 1.664635  | -3.988396 | 0.810172  |
| C | -0.263094 | -4.171985 | -0.609326 |
| C | 1.079600  | -4.455655 | -0.372308 |
| C | 0.362919  | 5.810787  | 0.217924  |
| C | -1.096203 | 3.790901  | -4.165687 |
| H | -1.776844 | 4.384259  | 1.145714  |
| H | 0.398619  | 5.274466  | -2.436817 |
| H | -2.988523 | 2.652914  | -2.583752 |
| H | -0.991422 | -2.415407 | 2.200358  |
| H | -0.725795 | -4.511806 | -1.533275 |
| H | 2.715047  | -4.201926 | 1.002945  |
| C | 1.575506  | -2.707673 | 2.989446  |
| C | 1.899136  | -5.250330 | -1.357421 |
| C | 5.644398  | 0.388659  | -0.097400 |
| C | 6.289740  | 0.169462  | 1.212359  |
| C | 7.736679  | -0.017926 | 1.157751  |
| C | 8.449595  | 0.103339  | 0.015704  |
| C | 7.808065  | 0.422845  | -1.233123 |
| C | 6.459267  | 0.542846  | -1.278298 |
| H | 8.237065  | -0.243528 | 2.095525  |
| H | 9.527152  | -0.030448 | 0.038659  |
| H | 8.405531  | 0.565737  | -2.126522 |
| H | 5.950311  | 0.781372  | -2.204982 |
| C | 4.234191  | 0.621646  | -0.191381 |
| C | 5.643802  | 0.020882  | 2.397395  |
| H | 4.580481  | 0.175259  | 2.525482  |
| C | 2.446984  | -1.472422 | -0.752647 |
| O | 1.331016  | -0.995495 | -0.679965 |
| C | 3.475165  | -1.231492 | 0.290189  |
| H | 3.105488  | -1.224729 | 1.312126  |
| N | 4.569895  | -2.047519 | 0.114976  |
| N | 5.672463  | -2.013188 | -0.174790 |
| O | 2.891525  | -2.159879 | -1.795319 |
| C | 1.981663  | -2.251513 | -2.896339 |
| H | 2.492989  | -2.847671 | -3.648942 |
| H | 1.056753  | -2.738971 | -2.577344 |
| H | 1.764186  | -1.251538 | -3.277649 |
| O | 3.759216  | 0.746554  | -1.489974 |
| H | 2.969834  | 1.304117  | -1.459219 |
| H | 6.214379  | -0.219516 | 3.287925  |
| C | 3.546010  | 1.583891  | 0.752952  |
| C | 2.169620  | 1.528393  | 0.992613  |
| C | 4.277048  | 2.671993  | 1.250853  |
| C | 1.536498  | 2.528773  | 1.730712  |
| H | 1.554984  | 0.722936  | 0.604774  |
| C | 3.648513  | 3.656900  | 2.000856  |
| H | 5.341420  | 2.732821  | 1.051092  |
| C | 2.276777  | 3.585718  | 2.247328  |
| H | 0.462728  | 2.459531  | 1.869162  |
| H | 4.230299  | 4.488154  | 2.386416  |

|   |           |           |           |
|---|-----------|-----------|-----------|
| H | 1.788603  | 4.362473  | 2.828343  |
| H | 0.040836  | 5.920976  | 1.256358  |
| H | 0.434952  | 6.809345  | -0.223615 |
| H | 1.367244  | 5.375647  | 0.225327  |
| H | -0.107392 | 4.128214  | -4.484973 |
| H | -1.840978 | 4.375895  | -4.715084 |
| H | -1.215801 | 2.746261  | -4.465259 |
| H | 1.088537  | -3.108653 | 3.883150  |
| H | 1.482906  | -1.616638 | 3.036433  |
| H | 2.636193  | -2.968650 | 3.041167  |
| H | 2.850221  | -4.749465 | -1.564185 |
| H | 1.365767  | -5.383684 | -2.302223 |
| H | 2.129432  | -6.244291 | -0.961489 |

**TS-(3+2)-B4-3R5R**

|   |           |           |           |
|---|-----------|-----------|-----------|
| H | 0.241969  | -0.024391 | -1.212445 |
| P | -1.329424 | 0.040869  | 0.227995  |
| O | -0.454771 | -0.645113 | -0.885027 |
| O | -0.663508 | 0.861740  | 1.252003  |
| H | -6.559188 | 0.583771  | 3.064498  |
| H | -7.350136 | 0.786124  | 1.502427  |
| H | -5.655503 | 3.264625  | 2.702236  |
| C | -6.394876 | 0.544421  | 1.984461  |
| C | -5.024297 | 2.779071  | 1.964099  |
| H | -6.642301 | -1.563215 | 1.335542  |
| C | -5.858905 | -0.820409 | 1.510731  |
| C | -5.306044 | 1.490366  | 1.531625  |
| H | -5.167069 | -1.223021 | 2.257728  |
| C | -3.905034 | 3.438066  | 1.457156  |
| H | -3.670724 | 4.446804  | 1.783979  |
| H | -6.953002 | 0.119992  | -0.739876 |
| H | -7.051071 | -2.332674 | -0.879400 |
| C | -4.488343 | 0.861681  | 0.587372  |
| C | -5.055346 | -0.496861 | 0.218426  |
| C | -6.025102 | -0.400197 | -0.993917 |
| C | -6.234390 | -1.859009 | -1.437987 |
| C | -3.043364 | 2.818254  | 0.547840  |
| C | -3.356450 | 1.517134  | 0.132862  |
| C | -4.188793 | -1.668001 | -0.219052 |
| C | -4.906482 | -2.491372 | -1.091672 |
| H | -5.527196 | 0.159890  | -1.792192 |
| O | -2.152477 | -1.150584 | 0.922817  |
| H | -6.475453 | -1.949537 | -2.500520 |
| C | -2.895249 | -2.024373 | 0.134891  |
| C | -0.886528 | 4.017299  | 0.969266  |
| C | -1.811419 | 3.491297  | 0.061418  |
| C | -4.366312 | -3.690043 | -1.536289 |
| O | -2.447355 | 0.812830  | -0.656226 |
| C | -0.397401 | -3.375384 | 1.334759  |
| C | -2.313866 | -3.226183 | -0.297959 |
| H | -4.928136 | -4.336386 | -2.203866 |
| C | -3.088888 | -4.053742 | -1.120943 |
| C | 0.275613  | 4.642050  | 0.522593  |
| C | -1.556715 | 3.589997  | -1.305317 |
| C | 0.907691  | -3.749790 | 1.656850  |
| C | -0.923111 | -3.610364 | 0.060475  |
| H | -2.666509 | -5.000048 | -1.443736 |
| C | 0.491609  | 4.752420  | -0.855163 |

|   |           |           |           |
|---|-----------|-----------|-----------|
| C | -0.407997 | 4.225178  | -1.779814 |
| C | 1.689339  | -4.371675 | 0.682972  |
| C | -0.115057 | -4.239785 | -0.893154 |
| C | 1.191135  | -4.625988 | -0.596808 |
| C | 1.294303  | 5.185951  | 1.492160  |
| C | -0.144551 | 4.292979  | -3.261881 |
| H | -1.063491 | 3.893541  | 2.034737  |
| H | 1.388856  | 5.260227  | -1.205806 |
| H | -2.265110 | 3.162760  | -2.010248 |
| H | -1.012665 | -2.897795 | 2.090047  |
| H | -0.502676 | -4.404216 | -1.895921 |
| H | 2.712734  | -4.655676 | 0.923215  |
| C | 1.454666  | -3.517689 | 3.041463  |
| C | 2.071045  | -5.263121 | -1.642122 |
| C | 3.500312  | -0.543182 | 1.751157  |
| C | 4.751759  | -0.605008 | 0.970291  |
| C | 5.977268  | -0.621849 | 1.765405  |
| C | 5.979627  | -0.773830 | 3.110392  |
| C | 4.753241  | -0.867017 | 3.852097  |
| C | 3.583501  | -0.721994 | 3.186441  |
| H | 6.913871  | -0.561712 | 1.227505  |
| H | 6.927283  | -0.829836 | 3.637853  |
| H | 4.770476  | -1.009997 | 4.926846  |
| H | 2.640418  | -0.734942 | 3.728243  |
| C | 2.224597  | -0.270330 | 1.231936  |
| C | 4.896876  | -0.523688 | -0.396363 |
| H | 1.395109  | -0.316080 | 1.933485  |
| C | 2.086129  | 1.907613  | -0.692595 |
| O | 1.287936  | 1.365226  | -1.434750 |
| C | 2.092728  | 1.681105  | 0.774083  |
| H | 1.134354  | 1.873669  | 1.256050  |
| N | 3.163940  | 2.206468  | 1.433184  |
| N | 4.083839  | 2.030115  | 2.073076  |
| O | 3.043558  | 2.738175  | -1.100045 |
| C | 3.090245  | 3.062704  | -2.492974 |
| H | 4.144523  | 3.140618  | -2.756371 |
| H | 2.598323  | 2.290568  | -3.081502 |
| H | 2.594732  | 4.024274  | -2.639266 |
| H | 1.934754  | -0.545473 | 0.227422  |
| O | 6.170155  | -0.206749 | -0.853821 |
| H | 6.334125  | -0.720161 | -1.654745 |
| C | 3.932928  | -0.713160 | -1.487925 |
| C | 4.123247  | -0.006252 | -2.690058 |
| C | 2.894825  | -1.660995 | -1.448341 |
| C | 3.279634  | -0.194954 | -3.779761 |
| H | 4.936525  | 0.711152  | -2.749709 |
| C | 2.037504  | -1.827647 | -2.529051 |
| H | 2.762513  | -2.275970 | -0.561939 |
| C | 2.219157  | -1.091821 | -3.700430 |
| H | 3.447779  | 0.371045  | -4.692052 |
| H | 1.225788  | -2.544436 | -2.449933 |
| H | 1.549846  | -1.229497 | -4.543064 |
| H | 1.168861  | 4.747984  | 2.485650  |
| H | 2.310384  | 4.969416  | 1.148001  |
| H | 1.204901  | 6.272472  | 1.593249  |
| H | -1.064566 | 4.491173  | -3.817503 |
| H | 0.575224  | 5.078924  | -3.506171 |
| H | 0.257038  | 3.337934  | -3.618310 |

|   |          |           |           |
|---|----------|-----------|-----------|
| H | 0.905611 | -2.721865 | 3.551676  |
| H | 2.510183 | -3.235320 | 3.008246  |
| H | 1.367939 | -4.424037 | 3.650256  |
| H | 2.877295 | -4.582228 | -1.935966 |
| H | 1.502026 | -5.514069 | -2.540482 |
| H | 2.533213 | -6.178944 | -1.263106 |

**TS-(3+2)-B4-3R5S**

|   |           |           |           |
|---|-----------|-----------|-----------|
| H | 0.509969  | 1.028283  | -2.223662 |
| P | 1.293980  | -0.246718 | -0.733740 |
| O | 1.405296  | 0.638899  | -2.023248 |
| O | -0.056497 | -0.523523 | -0.228028 |
| H | 5.131558  | -2.816320 | 3.365581  |
| H | 6.034297  | -3.368840 | 1.955220  |
| H | 3.245802  | -4.851791 | 2.733597  |
| C | 5.195269  | -2.739430 | 2.276976  |
| C | 3.035135  | -4.177991 | 1.908556  |
| H | 6.400768  | -0.937416 | 1.805231  |
| C | 5.365725  | -1.290073 | 1.787566  |
| C | 3.916561  | -3.154182 | 1.587940  |
| H | 4.767442  | -0.620743 | 2.414592  |
| C | 1.857747  | -4.313199 | 1.177342  |
| H | 1.153658  | -5.102102 | 1.423884  |
| H | 6.430763  | -2.586695 | -0.304731 |
| H | 7.498084  | -0.378591 | -0.199653 |
| C | 3.643905  | -2.291898 | 0.523090  |
| C | 4.766333  | -1.284594 | 0.349191  |
| C | 5.844480  | -1.739518 | -0.672201 |
| C | 6.685125  | -0.472871 | -0.929869 |
| C | 1.530598  | -3.440156 | 0.132019  |
| C | 2.462132  | -2.439025 | -0.186043 |
| C | 4.521168  | 0.137157  | -0.129046 |
| C | 5.669324  | 0.634660  | -0.754795 |
| H | 5.342301  | -2.044652 | -1.595938 |
| O | 2.199022  | 0.444269  | 0.424697  |
| H | 7.141996  | -0.463158 | -1.923045 |
| C | 3.418600  | 0.967401  | 0.002589  |
| C | -0.947108 | -3.663513 | 0.229263  |
| C | 0.209242  | -3.523540 | -0.543685 |
| C | 5.741936  | 1.961666  | -1.155611 |
| O | 2.186741  | -1.510896 | -1.187507 |
| C | 2.078543  | 3.694026  | 1.178294  |
| C | 3.472951  | 2.319213  | -0.359190 |
| H | 6.632497  | 2.342563  | -1.646421 |
| C | 4.652351  | 2.803059  | -0.927186 |
| C | -2.213535 | -3.665436 | -0.356202 |
| C | 0.089074  | -3.409412 | -1.930534 |
| C | 0.980931  | 4.511093  | 1.465304  |
| C | 2.294824  | 3.202645  | -0.107409 |
| H | 4.697543  | 3.848594  | -1.216243 |
| C | -2.302657 | -3.534138 | -1.742735 |
| C | -1.164561 | -3.407687 | -2.540299 |
| C | 0.087305  | 4.807987  | 0.439823  |
| C | 1.402513  | 3.546950  | -1.128550 |
| C | 0.288830  | 4.342610  | -0.863792 |
| C | -3.457934 | -3.787405 | 0.486226  |
| C | -1.288712 | -3.217120 | -4.031029 |
| H | -0.857640 | -3.730783 | 1.311711  |

|   |           |           |           |
|---|-----------|-----------|-----------|
| H | -3.287290 | -3.509641 | -2.206968 |
| H | 0.982671  | -3.300199 | -2.538366 |
| H | 2.780036  | 3.435485  | 1.968940  |
| H | 1.579028  | 3.175421  | -2.133722 |
| H | -0.780863 | 5.429257  | 0.652988  |
| C | 0.793435  | 5.070616  | 2.853025  |
| C | -0.677830 | 4.719838  | -1.958500 |
| C | -4.344520 | -0.452961 | -0.124849 |
| C | -4.776134 | -0.674656 | 1.284029  |
| C | -6.118940 | -1.229949 | 1.472476  |
| C | -6.975979 | -1.416923 | 0.450343  |
| C | -6.602619 | -1.076055 | -0.909632 |
| C | -5.362262 | -0.618071 | -1.161738 |
| H | -6.410832 | -1.477882 | 2.485663  |
| H | -7.962692 | -1.827543 | 0.640988  |
| H | -7.317953 | -1.210834 | -1.714046 |
| H | -5.053079 | -0.388007 | -2.179321 |
| C | -3.015234 | -0.450786 | -0.564639 |
| C | -4.081419 | -0.327351 | 2.400461  |
| H | -2.847780 | -0.631689 | -1.625358 |
| C | -2.019572 | 1.789003  | -1.969329 |
| O | -0.971687 | 1.562582  | -2.553732 |
| C | -2.284578 | 1.518385  | -0.546913 |
| H | -1.442540 | 1.498168  | 0.140951  |
| N | -3.417169 | 2.119679  | -0.092162 |
| N | -4.523764 | 1.921675  | 0.123712  |
| O | -3.101510 | 2.223233  | -2.617356 |
| C | -2.949251 | 2.400393  | -4.027498 |
| H | -3.924018 | 2.722481  | -4.386826 |
| H | -2.191942 | 3.159414  | -4.233024 |
| H | -2.651951 | 1.460730  | -4.496283 |
| H | -2.203234 | -0.804948 | 0.053870  |
| O | -4.704063 | -0.477446 | 3.623442  |
| H | -4.034215 | -0.385217 | 4.309436  |
| C | -2.747501 | 0.317460  | 2.509460  |
| C | -2.678725 | 1.676301  | 2.859596  |
| C | -1.561563 | -0.406789 | 2.375250  |
| C | -1.447255 | 2.303797  | 3.006721  |
| H | -3.602655 | 2.236187  | 2.977854  |
| C | -0.327971 | 0.216576  | 2.546949  |
| H | -1.602128 | -1.457080 | 2.099283  |
| C | -0.268481 | 1.572016  | 2.848681  |
| H | -1.404964 | 3.363512  | 3.240156  |
| H | 0.584616  | -0.350823 | 2.401559  |
| H | 0.696791  | 2.059217  | 2.940480  |
| H | -0.668580 | 5.799929  | -2.134321 |
| H | -0.421605 | 4.217324  | -2.893935 |
| H | -1.704752 | 4.445287  | -1.689718 |
| H | -0.167161 | 5.582725  | 2.948162  |
| H | 1.581035  | 5.792762  | 3.089746  |
| H | 0.837892  | 4.283933  | 3.613511  |
| H | -1.330071 | -2.150975 | -4.280689 |
| H | -0.431909 | -3.643068 | -4.558671 |
| H | -2.197666 | -3.684364 | -4.417579 |
| H | -4.331886 | -3.389854 | -0.037834 |
| H | -3.659111 | -4.833648 | 0.740552  |
| H | -3.359973 | -3.228783 | 1.422135  |

**TS-(3+2)-B4-3S5R**

|   |           |           |           |
|---|-----------|-----------|-----------|
| H | -0.330612 | 0.440210  | 1.267487  |
| P | -1.393535 | 0.226780  | -0.619933 |
| O | -0.720928 | 1.023095  | 0.558899  |
| O | -0.718358 | 0.218075  | -1.924777 |
| H | -6.727049 | -2.644558 | -1.527849 |
| H | -6.598517 | -3.266748 | 0.115059  |
| H | -4.848274 | -4.754766 | -2.039441 |
| C | -6.131536 | -2.591710 | -0.612394 |
| C | -4.180727 | -4.043915 | -1.561821 |
| H | -6.844303 | -0.872249 | 0.592377  |
| C | -6.014193 | -1.161765 | -0.057922 |
| C | -4.686663 | -2.967091 | -0.848317 |
| H | -5.962570 | -0.445465 | -0.884314 |
| C | -2.801279 | -4.200248 | -1.654595 |
| H | -2.379695 | -5.044231 | -2.191871 |
| H | -5.451454 | -2.679721 | 2.076145  |
| H | -6.491486 | -0.611787 | 2.904167  |
| C | -3.831863 | -2.052324 | -0.222149 |
| C | -4.650905 | -1.148455 | 0.689160  |
| C | -4.823843 | -1.784563 | 2.099665  |
| C | -5.397121 | -0.648657 | 2.968014  |
| C | -1.918277 | -3.261278 | -1.110571 |
| C | -2.459901 | -2.163827 | -0.424891 |
| C | -4.254384 | 0.260867  | 1.081122  |
| C | -4.775475 | 0.577479  | 2.340092  |
| H | -3.834808 | -2.070591 | 2.473034  |
| O | -2.877982 | 0.839110  | -0.778587 |
| H | -5.139365 | -0.751051 | 4.025522  |
| C | -3.533127 | 1.215498  | 0.388179  |
| C | 0.336364  | -2.628071 | -2.018831 |
| C | -0.450285 | -3.478989 | -1.247742 |
| C | -4.642085 | 1.858936  | 2.854791  |
| O | -1.608571 | -1.206247 | 0.117399  |
| C | -2.732208 | 3.698522  | -1.246225 |
| C | -3.379525 | 2.521885  | 0.875442  |
| H | -5.049280 | 2.109451  | 3.829685  |
| C | -3.966210 | 2.823255  | 2.109144  |
| C | 1.703131  | -2.870803 | -2.182203 |
| C | 0.139338  | -4.594421 | -0.639532 |
| C | -2.023624 | 4.687378  | -1.934415 |
| C | -2.595382 | 3.543123  | 0.134520  |
| H | -3.870235 | 3.834526  | 2.492397  |
| C | 2.274298  | -3.968007 | -1.543060 |
| C | 1.504098  | -4.841462 | -0.768900 |
| C | -1.175839 | 5.527069  | -1.216225 |
| C | -1.724375 | 4.394000  | 0.827815  |
| C | -1.015611 | 5.393370  | 0.166603  |
| C | 2.515355  | -1.949584 | -3.056033 |
| C | 2.154460  | -6.010188 | -0.072563 |
| H | -0.116262 | -1.770873 | -2.504627 |
| H | 3.343627  | -4.146556 | -1.643298 |
| H | -0.478366 | -5.264463 | -0.044535 |
| H | -3.400885 | 3.042091  | -1.794914 |
| H | -1.588388 | 4.256640  | 1.897850  |
| H | -0.616893 | 6.297838  | -1.743326 |
| C | -2.161233 | 4.811155  | -3.430321 |
| C | -0.084781 | 6.315847  | 0.912928  |

|   |           |           |           |
|---|-----------|-----------|-----------|
| C | 4.949125  | 0.047714  | 1.553078  |
| C | 5.743382  | 0.915357  | 0.639450  |
| C | 7.190540  | 0.686601  | 0.625001  |
| C | 7.780347  | -0.297775 | 1.330033  |
| C | 6.998966  | -1.191781 | 2.159532  |
| C | 5.668035  | -1.014947 | 2.251707  |
| H | 7.784405  | 1.346130  | 0.004697  |
| H | 8.857434  | -0.424307 | 1.282380  |
| H | 7.491413  | -1.984124 | 2.712886  |
| H | 5.069116  | -1.661940 | 2.888920  |
| C | 3.645764  | 0.305175  | 2.007745  |
| C | 5.247530  | 1.789973  | -0.280950 |
| H | 3.228452  | 1.301291  | 1.977405  |
| C | 1.381084  | -1.245022 | 1.418791  |
| O | 0.463418  | -0.757621 | 2.065643  |
| C | 2.287739  | -0.413102 | 0.611738  |
| H | 1.840777  | 0.461291  | 0.143050  |
| N | 3.167642  | -1.078419 | -0.180373 |
| N | 4.274403  | -1.349855 | -0.277464 |
| O | 1.721813  | -2.520906 | 1.488821  |
| C | 0.857013  | -3.333562 | 2.292372  |
| H | 1.217340  | -4.352642 | 2.166724  |
| H | 0.914618  | -3.019608 | 3.336322  |
| H | -0.169969 | -3.240949 | 1.933812  |
| H | 3.316318  | -0.283719 | 2.861240  |
| O | 6.128753  | 2.335716  | -1.190979 |
| H | 5.696862  | 3.089045  | -1.608218 |
| C | 3.835481  | 2.152987  | -0.546902 |
| C | 3.095206  | 2.958553  | 0.325696  |
| C | 3.236609  | 1.719416  | -1.740467 |
| C | 1.761154  | 3.251429  | 0.055857  |
| H | 3.571912  | 3.336513  | 1.225807  |
| C | 1.902112  | 2.013648  | -2.010324 |
| H | 3.817416  | 1.109227  | -2.428326 |
| C | 1.157686  | 2.769138  | -1.104205 |
| H | 1.177252  | 3.839081  | 0.756979  |
| H | 1.420284  | 1.621791  | -2.899862 |
| H | 0.106411  | 2.969062  | -1.289818 |
| H | 2.330270  | -2.156870 | -4.114845 |
| H | 2.231651  | -0.908771 | -2.868359 |
| H | 3.586327  | -2.059094 | -2.868582 |
| H | 2.909460  | -5.665449 | 0.642259  |
| H | 2.662382  | -6.665372 | -0.786371 |
| H | 1.419211  | -6.609782 | 0.470242  |
| H | -1.674978 | 3.968364  | -3.931827 |
| H | -3.212317 | 4.807724  | -3.731307 |
| H | -1.703150 | 5.732378  | -3.796582 |
| H | 0.905283  | 6.333810  | 0.446987  |
| H | -0.466151 | 7.341671  | 0.912589  |
| H | 0.034166  | 6.003020  | 1.953270  |

**TS-(3+2)-B4-3S5S**

|   |           |           |           |
|---|-----------|-----------|-----------|
| H | -0.464443 | 1.515731  | 1.128077  |
| P | -1.493504 | -0.146698 | 0.161753  |
| O | -1.218193 | 0.881897  | 1.305760  |
| O | -0.384701 | -0.542360 | -0.725088 |
| H | -5.644772 | -3.278564 | -2.881461 |
| H | -6.362377 | -3.715086 | -1.331681 |



|   |           |           |           |                        |           |           |           |
|---|-----------|-----------|-----------|------------------------|-----------|-----------|-----------|
| H | -3.629879 | -5.186023 | -2.235427 | H                      | 4.758406  | -1.716366 | -4.705460 |
| C | -5.596246 | -3.089286 | -1.805879 | H                      | 2.388007  | -2.272863 | -4.096306 |
| C | -3.351332 | -4.410828 | -1.527896 | H                      | 1.443357  | -1.413992 | -1.968641 |
| H | -6.838685 | -1.301905 | -1.376151 | C                      | 2.612970  | 0.180516  | -0.273415 |
| C | -5.789979 | -1.603417 | -1.450902 | C                      | 5.685197  | -0.202454 | -0.539198 |
| C | -4.229325 | -3.378029 | -1.229466 | H                      | 3.191985  | 0.744651  | 0.452214  |
| H | -5.307955 | -0.978746 | -2.209999 | C                      | 1.458098  | 2.700831  | -0.083975 |
| C | -2.096256 | -4.432695 | -0.923986 | O                      | 0.751694  | 2.553304  | 0.903492  |
| H | -1.401960 | -5.238227 | -1.142560 | C                      | 1.567274  | 1.687278  | -1.136527 |
| H | -6.502763 | -2.766612 | 0.849603  | H                      | 0.658319  | 1.150289  | -1.404009 |
| H | -7.720886 | -0.634118 | 0.726881  | N                      | 2.334087  | 1.979330  | -2.225034 |
| C | -3.869246 | -2.379676 | -0.319317 | N                      | 3.183417  | 1.571066  | -2.873558 |
| C | -5.028538 | -1.420389 | -0.106485 | O                      | 2.292772  | 3.725373  | -0.225611 |
| C | -5.937077 | -1.858761 | 1.077430  | C                      | 2.364697  | 4.615857  | 0.893237  |
| C | -6.824262 | -0.631185 | 1.358822  | H                      | 3.038201  | 5.413546  | 0.587136  |
| C | -1.683051 | -3.422829 | -0.047545 | H                      | 1.372828  | 5.005354  | 1.125394  |
| C | -2.599632 | -2.399874 | 0.236587  | H                      | 2.760392  | 4.088067  | 1.763184  |
| C | -4.833343 | 0.048058  | 0.232495  | H                      | 1.694554  | -0.264830 | 0.102358  |
| C | -5.909394 | 0.514609  | 0.992184  | O                      | 6.970379  | 0.058289  | -0.969185 |
| H | -5.302045 | -2.060684 | 1.946166  | H                      | 7.582328  | -0.243890 | -0.286385 |
| O | -2.696191 | 0.421603  | -0.759706 | C                      | 5.525531  | -0.156156 | 0.927548  |
| H | -7.161580 | -0.579821 | 2.397442  | C                      | 4.708420  | -1.074585 | 1.608285  |
| C | -3.815025 | 0.924205  | -0.109396 | C                      | 6.298281  | 0.734957  | 1.684050  |
| C | 0.789554  | -3.723048 | -0.279085 | C                      | 4.645257  | -1.075792 | 2.991438  |
| C | -0.313865 | -3.434595 | 0.532045  | H                      | 4.110115  | -1.775204 | 1.034000  |
| C | -5.999399 | 1.856888  | 1.334986  | C                      | 6.235368  | 0.729372  | 3.077186  |
| O | -2.197602 | -1.314803 | 1.018464  | H                      | 6.936081  | 1.448909  | 1.170736  |
| C | -2.062322 | 3.179557  | -1.300332 | C                      | 5.409118  | -0.171725 | 3.736493  |
| C | -3.860836 | 2.282774  | 0.237210  | H                      | 4.003740  | -1.792623 | 3.496013  |
| H | -6.840328 | 2.225287  | 1.914717  | H                      | 6.834791  | 1.434838  | 3.644291  |
| C | -4.987204 | 2.728061  | 0.940852  | H                      | 5.359771  | -0.178052 | 4.820429  |
| C | 2.075838  | -3.800998 | 0.253176  | H                      | -0.556720 | 5.678225  | 2.503029  |
| C | -0.112563 | -3.198942 | 1.893608  | H                      | -0.312369 | 6.888360  | 1.231033  |
| C | -1.054850 | 4.097576  | -1.589675 | H                      | -1.900659 | 6.692940  | 1.983452  |
| C | -2.748342 | 3.219898  | -0.076549 | H                      | 0.736399  | 4.258376  | -2.778701 |
| H | -5.055577 | 3.781614  | 1.193158  | H                      | -0.722816 | 4.839605  | -3.587510 |
| C | 2.240939  | -3.585677 | 1.625145  | H                      | -0.448539 | 3.102673  | -3.409013 |
| C | 1.163937  | -3.270605 | 2.452613  | H                      | 1.505205  | -1.929167 | 4.104236  |
| C | -0.735363 | 5.072977  | -0.638896 | H                      | 3.923926  | -3.247372 | -0.726689 |
| C | -2.384108 | 4.187661  | 0.861849  | H                      | 2.957805  | -4.412050 | -1.619883 |
| C | -1.385907 | 5.125788  | 0.591022  | H                      | 3.859073  | -4.930176 | -0.180543 |
| C | 3.267526  | -4.118608 | -0.614837 | H                      | 2.256237  | -3.518965 | 4.298922  |
| C | 1.370160  | -3.000823 | 3.921676  | H                      | 0.508902  | -3.326908 | 4.509890  |
| H | 0.641694  | -3.874942 | -1.345580 |                        |           |           |           |
| H | 3.236297  | -3.678020 | 2.058828  | <b>TS-[4+2]-B2-R-2</b> |           |           |           |
| H | -0.964444 | -2.972794 | 2.528560  | H                      | 1.103998  | 1.198524  | -1.978110 |
| H | -2.330319 | 2.431916  | -2.040014 | P                      | 1.794654  | -0.508407 | -0.103866 |
| H | -2.876078 | 4.200206  | 1.831221  | O                      | 1.858230  | 0.545535  | -1.185157 |
| H | 0.043942  | 5.799197  | -0.866430 | O                      | 0.581525  | -0.725404 | 0.716822  |
| C | -0.332966 | 4.069825  | -2.913581 | H                      | 5.498109  | -4.604236 | 2.697940  |
| C | -1.016907 | 6.154229  | 1.630368  | H                      | 6.086727  | -5.008609 | 1.086306  |
| C | 3.292236  | -0.488520 | -1.303818 | H                      | 3.209944  | -6.148221 | 1.962619  |
| C | 4.753862  | -0.486006 | -1.498331 | C                      | 5.443891  | -4.316880 | 1.644539  |
| C | 5.204650  | -0.821579 | -2.844949 | C                      | 3.021256  | -5.266269 | 1.358354  |
| C | 4.379045  | -1.427322 | -3.729908 | H                      | 6.930432  | -2.706690 | 1.303611  |
| C | 3.006788  | -1.723243 | -3.394102 | C                      | 5.850859  | -2.852381 | 1.400037  |
| C | 2.491452  | -1.271167 | -2.225440 | C                      | 4.029932  | -4.343929 | 1.113224  |
| H | 6.244457  | -0.643100 | -3.090560 | H                      | 5.494122  | -2.229160 | 2.226479  |

|   |           |           |           |                        |           |           |           |
|---|-----------|-----------|-----------|------------------------|-----------|-----------|-----------|
| C | 1.750725  | -5.028978 | 0.845072  | C                      | -5.084251 | 1.468903  | 0.570498  |
| H | 0.957736  | -5.745297 | 1.036163  | H                      | 0.444571  | -2.529950 | -2.106622 |
| H | 6.283475  | -3.935288 | -1.007603 | H                      | -0.723909 | -4.436055 | 1.560668  |
| H | 7.842313  | -2.047666 | -0.756288 | H                      | 3.330068  | 1.904513  | 2.406488  |
| C | 3.792364  | -3.226793 | 0.308734  | H                      | 3.315395  | 3.106471  | -1.709413 |
| C | 5.083580  | -2.445735 | 0.109153  | C                      | 1.233070  | 4.853177  | -1.539917 |
| C | 5.873286  | -2.930082 | -1.140297 | F                      | 1.325760  | 6.171362  | -1.307846 |
| C | 6.947434  | -1.847728 | -1.358364 | F                      | -0.083243 | 4.581611  | -1.648629 |
| C | 1.454863  | -3.875345 | 0.106043  | F                      | 1.784852  | 4.616129  | -2.737153 |
| C | 2.511797  | -2.991676 | -0.176468 | C                      | 1.325159  | 3.456444  | 3.251370  |
| C | 5.120689  | -0.942605 | -0.117638 | F                      | 0.311065  | 4.327107  | 3.357636  |
| C | 6.240506  | -0.598832 | -0.883151 | F                      | 2.269837  | 3.830121  | 4.127643  |
| H | 5.190621  | -2.948334 | -1.996051 | F                      | 0.870255  | 2.262336  | 3.668987  |
| O | 3.062637  | -0.281868 | 0.909729  | C                      | -2.009658 | -1.682690 | -2.836819 |
| H | 7.269349  | -1.771800 | -2.400335 | F                      | -2.991813 | -0.805302 | -2.552163 |
| C | 4.252267  | 0.056638  | 0.294015  | F                      | -2.462530 | -2.448235 | -3.841823 |
| C | 6.528892  | 0.728445  | -1.170634 | F                      | -0.970256 | -0.982247 | -3.311961 |
| O | 2.288229  | -1.850637 | -0.912475 | C                      | -3.366085 | -3.982923 | 1.359945  |
| C | 4.509111  | 1.405282  | -0.002618 | F                      | -2.946603 | -4.889421 | 2.250766  |
| H | 7.398451  | 0.988807  | -1.766305 | F                      | -4.447520 | -4.494358 | 0.745368  |
| C | 5.663379  | 1.723959  | -0.719971 | F                      | -3.790894 | -2.912653 | 2.055987  |
| H | 5.861699  | 2.766024  | -0.954104 | O                      | -5.927973 | 2.472423  | 0.259375  |
| C | 0.046403  | -3.559180 | -0.251321 | H                      | -6.610735 | 2.138888  | -0.336733 |
| C | -0.314700 | -2.847576 | -1.403256 | C                      | -5.484702 | 0.142850  | 0.024293  |
| C | -0.970449 | -3.927931 | 0.635624  | C                      | -5.742920 | -0.916325 | 0.901082  |
| C | -1.641076 | -2.495068 | -1.627446 | C                      | -5.730289 | -0.015334 | -1.343961 |
| C | -2.297728 | -3.614285 | 0.373276  | C                      | -6.237830 | -2.118939 | 0.412361  |
| C | -2.652395 | -2.890025 | -0.758413 | H                      | -5.538588 | -0.793603 | 1.960084  |
| H | -3.688811 | -2.616244 | -0.943887 | C                      | -6.215789 | -1.225884 | -1.830276 |
| C | 3.480041  | 2.424550  | 0.326535  | H                      | -5.492341 | 0.795119  | -2.027294 |
| C | 2.940656  | 2.525630  | 1.605938  | C                      | -6.474023 | -2.276740 | -0.953209 |
| C | 2.939944  | 3.213342  | -0.697261 | H                      | -6.420755 | -2.939826 | 1.095909  |
| C | 1.871359  | 3.386776  | 1.854340  | H                      | -6.379487 | -1.350026 | -2.895497 |
| C | 1.865296  | 4.050146  | -0.441666 | H                      | -6.849030 | -3.222062 | -1.331746 |
| C | 1.316610  | 4.146474  | 0.837303  | H                      | -3.245858 | -0.546337 | 0.281106  |
| H | 0.466400  | 4.791625  | 1.029711  | H                      | -1.573164 | -0.446217 | 1.045103  |
| N | -2.474581 | 1.408014  | -0.719487 |                        |           |           |           |
| C | -1.177873 | 1.279741  | -1.085769 | <b>TS-[4+2]-B2-R-3</b> |           |           |           |
| N | -3.490659 | 1.908884  | -0.952160 | H                      | -0.211505 | -0.501623 | -1.160169 |
| H | -0.528638 | 0.715235  | -0.439502 | P                      | -0.514922 | 1.290718  | 0.144667  |
| C | -0.732662 | 1.882680  | -2.264377 | O                      | -0.830736 | 0.259040  | -0.986233 |
| O | 0.479419  | 1.817778  | -2.660779 | O                      | 0.244501  | 0.859036  | 1.335665  |
| O | -1.602096 | 2.542817  | -3.003929 | H                      | -2.277019 | 6.996039  | 1.576914  |
| C | -1.098377 | 3.133634  | -4.207937 | H                      | -1.856674 | 7.412430  | -0.084163 |
| H | -1.945023 | 3.661929  | -4.640814 | H                      | 0.510815  | 6.956622  | 2.071664  |
| H | -0.285756 | 3.821765  | -3.976755 | C                      | -1.968648 | 6.575835  | 0.616314  |
| H | -0.740777 | 2.355772  | -4.884732 | C                      | 0.449225  | 6.056170  | 1.468565  |
| C | -2.998770 | 0.946995  | 1.837010  | H                      | -3.800941 | 5.951383  | -0.465581 |
| C | -4.212520 | 1.704916  | 1.650522  | C                      | -2.954367 | 5.523929  | 0.078632  |
| C | -4.427933 | 2.867594  | 2.463214  | C                      | -0.684609 | 5.786195  | 0.714209  |
| C | -3.539097 | 3.222282  | 3.431491  | H                      | -3.348134 | 4.932598  | 0.911683  |
| C | -2.333081 | 2.480391  | 3.618131  | C                      | 1.500592  | 5.142809  | 1.462378  |
| C | -2.072255 | 1.394191  | 2.843518  | H                      | 2.393562  | 5.331861  | 2.050282  |
| H | -5.335267 | 3.438392  | 2.306586  | H                      | -1.816216 | 6.280195  | -2.228571 |
| H | -3.742347 | 4.080099  | 4.064032  | H                      | -4.079039 | 5.493499  | -2.770745 |
| H | -1.612772 | 2.799239  | 4.363142  | C                      | -0.774921 | 4.622680  | -0.056103 |
| H | -1.139435 | 0.847264  | 2.942228  | C                      | -2.086816 | 4.594634  | -0.821125 |
| C | -2.567874 | -0.016481 | 0.934006  | C                      | -1.969168 | 5.197553  | -2.248777 |

|   |           |           |           |                        |           |           |           |
|---|-----------|-----------|-----------|------------------------|-----------|-----------|-----------|
| C | -3.273370 | 4.772295  | -2.953311 | C                      | 5.003660  | -2.301543 | -2.049188 |
| C | 1.426926  | 3.957726  | 0.725200  | H                      | 4.168691  | -0.806814 | -0.788492 |
| C | 0.271204  | 3.712333  | -0.024342 | C                      | 3.825217  | -4.408012 | -2.171361 |
| C | -2.818811 | 3.302516  | -1.131413 | C                      | 4.877080  | -3.635275 | -2.545889 |
| C | -3.580938 | 3.445108  | -2.296095 | H                      | 5.831631  | -1.676692 | -2.365612 |
| H | -1.111563 | 4.739590  | -2.752185 | H                      | 3.706015  | -5.409804 | -2.573324 |
| O | -1.957350 | 1.861486  | 0.586832  | H                      | 5.617260  | -4.022366 | -3.238734 |
| H | -3.159762 | 4.683184  | -4.036718 | H                      | 3.147035  | 3.267990  | -1.270900 |
| C | -2.859498 | 2.099867  | -0.448261 | H                      | 2.135089  | 2.388974  | 2.803559  |
| C | -4.428525 | 2.429341  | -2.718652 | H                      | -4.333712 | 0.720361  | 1.782654  |
| O | 0.136759  | 2.503816  | -0.703712 | H                      | -3.047748 | -1.419264 | -1.711998 |
| C | -3.718263 | 1.064608  | -0.836267 | C                      | -2.906754 | -3.866021 | -0.588502 |
| H | -5.015798 | 2.540141  | -3.625007 | F                      | -3.528501 | -4.940608 | -0.083941 |
| C | -4.509097 | 1.253158  | -1.971651 | F                      | -1.590588 | -4.042411 | -0.375876 |
| H | -5.171898 | 0.451137  | -2.283305 | F                      | -3.101777 | -3.862096 | -1.911827 |
| C | 2.539430  | 2.968726  | 0.770973  | C                      | -4.523719 | -1.426230 | 3.440956  |
| C | 3.343576  | 2.739130  | -0.342780 | F                      | -3.698752 | -2.197409 | 4.173020  |
| C | 2.788012  | 2.255794  | 1.947492  | F                      | -5.754397 | -1.936857 | 3.587449  |
| C | 4.405664  | 1.839134  | -0.265455 | F                      | -4.527577 | -0.205367 | 3.985627  |
| C | 3.828597  | 1.338996  | 1.999471  | C                      | 5.257622  | 1.629976  | -1.485745 |
| C | 4.661300  | 1.137231  | 0.903024  | F                      | 6.207428  | 0.702109  | -1.280400 |
| H | 5.476535  | 0.424285  | 0.953987  | F                      | 5.872583  | 2.760109  | -1.860954 |
| C | -3.736468 | -0.208552 | -0.067983 | F                      | 4.522444  | 1.220751  | -2.528564 |
| C | -4.083032 | -0.210907 | 1.286066  | C                      | 3.971227  | 0.452736  | 3.202642  |
| C | -3.381130 | -1.410780 | -0.680025 | F                      | 3.575831  | 1.063980  | 4.326035  |
| C | -4.102953 | -1.403410 | 1.999038  | F                      | 5.236504  | 0.048025  | 3.378743  |
| C | -3.391042 | -2.595273 | 0.050680  | F                      | 3.219239  | -0.654637 | 3.069130  |
| C | -3.764019 | -2.607100 | 1.388016  | H                      | 0.906226  | -4.486742 | -0.359022 |
| H | -3.775280 | -3.536407 | 1.948770  | H                      | 3.026974  | -4.003049 | 1.733849  |
| N | 0.396360  | -2.972962 | -2.082291 |                        |           |           |           |
| C | -0.216647 | -3.541525 | -3.102809 | <b>TS-[4+2]-B2-S-2</b> |           |           |           |
| N | 0.541249  | -2.020942 | -1.427458 | H                      | -0.610575 | -0.973466 | -2.188127 |
| H | 0.047274  | -4.540758 | -3.395571 | P                      | -1.878684 | -0.393185 | -0.234223 |
| C | -1.203690 | -2.779371 | -3.843331 | O                      | -1.360369 | -1.220831 | -1.416614 |
| O | -1.789308 | -3.170408 | -4.828404 | O                      | -1.067804 | 0.683459  | 0.365016  |
| O | -1.396357 | -1.538496 | -3.314988 | H                      | -6.939509 | -0.859684 | 3.384704  |
| C | -2.272854 | -0.701805 | -4.061931 | H                      | -7.818468 | -1.061603 | 1.869488  |
| H | -2.292421 | 0.251211  | -3.531946 | H                      | -6.813026 | 1.892302  | 2.707515  |
| H | -1.903035 | -0.574910 | -5.081747 | C                      | -6.815038 | -0.980940 | 2.305461  |
| H | -3.275067 | -1.138747 | -4.109538 | C                      | -6.106512 | 1.515330  | 1.974523  |
| C | 1.347685  | -2.739009 | 1.279588  | H                      | -6.495088 | -3.138766 | 1.906192  |
| C | 2.017749  | -3.722009 | 2.018005  | C                      | -5.944653 | -2.194242 | 1.934094  |
| C | 1.395927  | -4.322920 | 3.104199  | C                      | -6.046527 | 0.159347  | 1.680500  |
| C | 0.108071  | -3.936564 | 3.471444  | H                      | -5.130056 | -2.295205 | 2.658610  |
| C | -0.559178 | -2.954755 | 2.744860  | C                      | -5.221812 | 2.383794  | 1.342773  |
| C | 0.054274  | -2.357704 | 1.647729  | H                      | -5.248630 | 3.444524  | 1.574133  |
| H | 1.922030  | -5.081550 | 3.674019  | H                      | -7.365188 | -1.918789 | -0.321104 |
| H | -0.373337 | -4.396429 | 4.328394  | H                      | -6.758388 | -4.292032 | -0.116098 |
| H | -1.554809 | -2.643248 | 3.040805  | C                      | -5.149370 | -0.328130 | 0.725756  |
| H | -0.476618 | -1.608043 | 1.068206  | C                      | -5.331913 | -1.828747 | 0.550055  |
| C | 2.090570  | -2.024576 | 0.207739  | C                      | -6.337387 | -2.190031 | -0.578896 |
| C | 1.635585  | -4.649912 | -1.139317 | C                      | -6.136159 | -3.702830 | -0.800729 |
| H | 1.534743  | -5.573033 | -1.703062 | C                      | -4.271323 | 1.921056  | 0.425744  |
| O | 2.155059  | -0.699668 | 0.315122  | C                      | -4.266452 | 0.551269  | 0.113074  |
| H | 1.568058  | -0.332204 | 1.010867  | C                      | -4.185075 | -2.760083 | 0.195001  |
| C | 3.007514  | -2.621542 | -0.682721 | C                      | -4.666787 | -3.881735 | -0.489519 |
| C | 4.086652  | -1.814466 | -1.171300 | H                      | -6.054856 | -1.644029 | -1.484751 |
| C | 2.817948  | -3.937887 | -1.249762 | O                      | -2.301445 | -1.469024 | 0.920423  |

|   |           |           |           |                        |           |           |           |
|---|-----------|-----------|-----------|------------------------|-----------|-----------|-----------|
| H | -6.385964 | -4.019082 | -1.816862 | F                      | -0.133322 | 4.085064  | -3.526805 |
| C | -2.826882 | -2.656735 | 0.440039  | F                      | -2.018842 | 3.201966  | -4.116724 |
| C | -3.814537 | -4.917887 | -0.846917 | F                      | -0.489044 | 1.972772  | -3.228860 |
| O | -3.349158 | 0.049900  | -0.789954 | C                      | -0.905688 | 5.459341  | 1.303321  |
| C | -1.941693 | -3.688299 | 0.089558  | F                      | -1.823882 | 6.262922  | 1.859219  |
| H | -4.191961 | -5.783705 | -1.382249 | F                      | 0.022132  | 6.240979  | 0.731174  |
| C | -2.456655 | -4.821725 | -0.539619 | F                      | -0.302373 | 4.813779  | 2.320366  |
| H | -1.776218 | -5.621127 | -0.818502 | O                      | 6.321512  | 1.629222  | -0.469982 |
| C | -3.212711 | 2.819524  | -0.098660 | H                      | 6.946515  | 0.902263  | -0.584967 |
| C | -2.732265 | 2.719147  | -1.407977 | C                      | 5.467441  | -0.162643 | 0.841308  |
| C | -2.602127 | 3.735089  | 0.759824  | C                      | 5.756415  | -1.233225 | -0.012478 |
| C | -1.626440 | 3.456031  | -1.809936 | C                      | 5.502189  | -0.353481 | 2.226493  |
| C | -1.525927 | 4.503241  | 0.328186  | C                      | 6.051788  | -2.487135 | 0.514018  |
| C | -1.006537 | 4.356033  | -0.951166 | H                      | 5.697044  | -1.090897 | -1.087318 |
| H | -0.140932 | 4.923785  | -1.270201 | C                      | 5.816490  | -1.603141 | 2.747374  |
| C | -0.487960 | -3.483123 | 0.316217  | H                      | 5.275979  | 0.480703  | 2.883835  |
| C | -0.026672 | -3.070804 | 1.564661  | C                      | 6.086172  | -2.672140 | 1.894474  |
| C | 0.429161  | -3.589161 | -0.736445 | H                      | 6.237065  | -3.320087 | -0.156583 |
| C | 1.319173  | -2.771604 | 1.759850  | H                      | 5.834821  | -1.746892 | 3.822311  |
| C | 1.769263  | -3.288232 | -0.527819 | H                      | 6.316685  | -3.649224 | 2.306122  |
| C | 2.232744  | -2.879072 | 0.722109  | H                      | 3.085227  | -0.220856 | 1.233443  |
| H | 3.280318  | -2.630849 | 0.873898  | H                      | 1.440896  | 0.601141  | 1.360184  |
| N | 2.824367  | 0.434667  | -1.002130 |                        |           |           |           |
| C | 1.606041  | 0.012452  | -1.380640 |                        |           |           |           |
| N | 3.917376  | 0.634326  | -1.334921 | <b>TS-[4+2]-B2-S-3</b> |           |           |           |
| H | 0.795638  | 0.100680  | -0.678417 | H                      | -0.492956 | -0.300396 | -1.143000 |
| C | 1.400279  | -0.444841 | -2.701350 | P                      | 0.154313  | 1.409499  | 0.074898  |
| O | 0.295464  | -0.873866 | -3.113670 | O                      | -0.537481 | 0.700314  | -1.124159 |
| O | 2.447270  | -0.414871 | -3.518092 | O                      | 0.774071  | 0.589353  | 1.139638  |
| C | 2.212365  | -0.884781 | -4.846829 | H                      | 0.629635  | 7.155402  | 2.161626  |
| H | 3.161189  | -0.766237 | -5.366279 | H                      | 1.059969  | 7.594795  | 0.509203  |
| H | 1.909918  | -1.932433 | -4.827391 | H                      | 3.255519  | 6.091950  | 2.358759  |
| H | 1.432235  | -0.290748 | -5.325669 | C                      | 0.706123  | 6.771182  | 1.141353  |
| C | 3.090157  | 1.951540  | 1.226817  | C                      | 2.835734  | 5.346900  | 1.690114  |
| C | 4.436311  | 2.217720  | 0.778137  | H                      | -1.295851 | 6.949963  | 0.203107  |
| C | 4.857846  | 3.582121  | 0.635595  | C                      | -0.622519 | 6.194908  | 0.618082  |
| C | 4.037129  | 4.612075  | 0.977032  | C                      | 1.632322  | 5.581863  | 1.037103  |
| C | 2.704341  | 4.359385  | 1.421963  | H                      | -1.144773 | 5.683337  | 1.433053  |
| C | 2.247503  | 3.082958  | 1.519866  | C                      | 3.489937  | 4.131397  | 1.498296  |
| H | 5.864781  | 3.768905  | 0.283056  | H                      | 4.429481  | 3.930352  | 2.004232  |
| H | 4.394251  | 5.634370  | 0.909320  | H                      | 0.544570  | 6.779671  | -1.721190 |
| H | 2.052956  | 5.188846  | 1.671545  | H                      | -1.880728 | 6.864211  | -2.107198 |
| H | 1.225139  | 2.882655  | 1.825709  | C                      | 1.083207  | 4.622288  | 0.181504  |
| C | 2.509021  | 0.692433  | 1.174297  | C                      | -0.203220 | 5.135329  | -0.443252 |
| C | 5.286680  | 1.207967  | 0.284824  | C                      | 0.026939  | 5.821332  | -1.819239 |
| H | -3.193691 | 2.028515  | -2.104589 | C                      | -1.383420 | 5.942000  | -2.431279 |
| H | -2.940421 | 3.820691  | 1.788207  | C                      | 2.949524  | 3.140939  | 0.673466  |
| H | -0.728263 | -2.948981 | 2.383804  | C                      | 1.736298  | 3.410168  | 0.028786  |
| H | 0.076749  | -3.840297 | -1.731581 | C                      | -1.359036 | 4.212787  | -0.790437 |
| C | 2.755726  | -3.375899 | -1.656328 | C                      | -2.086766 | 4.727367  | -1.868863 |
| F | 3.522124  | -4.475424 | -1.569548 | H                      | 0.642290  | 5.161971  | -2.440025 |
| F | 3.596097  | -2.327027 | -1.661200 | O                      | -0.938876 | 2.404186  | 0.722123  |
| F | 2.150772  | -3.406139 | -2.853652 | H                      | -1.371828 | 5.948791  | -3.524183 |
| C | 1.734348  | -2.284443 | 3.117676  | C                      | -1.771964 | 3.028644  | -0.206949 |
| F | 3.052325  | -2.041559 | 3.185172  | C                      | -3.247013 | 4.099039  | -2.302035 |
| F | 1.440141  | -3.177593 | 4.074083  | O                      | 1.134082  | 2.410005  | -0.728549 |
| F | 1.102232  | -1.147390 | 3.441782  | C                      | -2.948342 | 2.376562  | -0.607017 |
| C | -1.062996 | 3.186816  | -3.175438 | H                      | -3.811031 | 4.496295  | -3.140283 |
|   |           |           |           | C                      | -3.681927 | 2.943029  | -1.652975 |

|   |           |           |           |                        |           |           |           |
|---|-----------|-----------|-----------|------------------------|-----------|-----------|-----------|
| H | -4.600135 | 2.456414  | -1.969011 | F                      | -6.188708 | -2.472494 | -0.362383 |
| C | 3.595354  | 1.811586  | 0.516541  | F                      | -4.257811 | -3.409346 | -0.501000 |
| C | 3.914237  | 1.312928  | -0.746583 | F                      | -4.930793 | -2.078028 | -2.073687 |
| C | 3.844891  | 1.016358  | 1.636998  | C                      | -3.748676 | -0.143680 | 3.603532  |
| C | 4.478440  | 0.046678  | -0.879346 | F                      | -4.002633 | -1.364405 | 4.100235  |
| C | 4.386643  | -0.253968 | 1.487454  | F                      | -4.667832 | 0.690004  | 4.112663  |
| C | 4.713260  | -0.752185 | 0.231177  | F                      | -2.561687 | 0.250844  | 4.086906  |
| H | 5.115176  | -1.752348 | 0.119752  | C                      | 4.801734  | -0.444999 | -2.261152 |
| C | -3.382383 | 1.123439  | 0.062703  | F                      | 5.407268  | -1.639946 | -2.246695 |
| C | -3.332375 | 1.026390  | 1.454658  | F                      | 5.603145  | 0.409617  | -2.912661 |
| C | -3.874513 | 0.034096  | -0.670199 | F                      | 3.691193  | -0.572281 | -3.010747 |
| C | -3.768879 | -0.125541 | 2.101490  | C                      | 4.504305  | -1.129696 | 2.701526  |
| C | -4.319548 | -1.104549 | -0.008697 | F                      | 4.975566  | -0.446184 | 3.756042  |
| C | -4.271626 | -1.196680 | 1.380298  | F                      | 5.318305  | -2.171450 | 2.493908  |
| H | -4.618548 | -2.091485 | 1.884698  | F                      | 3.308849  | -1.622350 | 3.064949  |
| N | -1.145878 | -2.642474 | -1.644549 |                        |           |           |           |
| C | -2.086822 | -2.834227 | -2.546167 |                        |           |           |           |
| N | -0.315374 | -1.944147 | -1.218070 | <b>TS-[4+2]-B4-R-2</b> |           |           |           |
| H | -2.663623 | -3.740341 | -2.534883 | H                      | -0.694288 | -1.496043 | -1.839482 |
| C | -2.411597 | -1.752396 | -3.465952 | P                      | -1.535088 | 0.235086  | -0.527399 |
| O | -3.235171 | -1.818325 | -4.350629 | O                      | -1.465256 | -0.795414 | -1.674595 |
| O | -1.718029 | -0.624089 | -3.178497 | O                      | -0.312838 | 0.843561  | 0.035112  |
| C | -2.030081 | 0.512004  | -3.975623 | H                      | -5.493710 | 2.913412  | 3.309527  |
| H | -1.503312 | 1.346249  | -3.512790 | H                      | -6.553139 | 3.091079  | 1.911191  |
| H | -1.699688 | 0.359147  | -5.005791 | H                      | -3.988327 | 5.045871  | 2.229480  |
| H | -3.108703 | 0.692855  | -3.981164 | C                      | -5.611605 | 2.645736  | 2.256049  |
| C | 0.022270  | -3.092311 | 1.149980  | C                      | -3.716475 | 4.282450  | 1.506576  |
| C | -1.007418 | -4.036736 | 0.755286  | H                      | -6.558528 | 0.641444  | 2.178462  |
| C | -2.128573 | -4.190676 | 1.653404  | C                      | -5.592014 | 1.126702  | 2.016321  |
| C | -2.239615 | -3.480862 | 2.804613  | C                      | -4.450029 | 3.108619  | 1.408739  |
| C | -1.247934 | -2.513546 | 3.156298  | H                      | -4.859807 | 0.659705  | 2.683133  |
| C | -0.173874 | -2.316912 | 2.345558  | C                      | -2.600747 | 4.452008  | 0.691648  |
| H | -2.894631 | -4.906967 | 1.372519  | H                      | -2.002313 | 5.354991  | 0.768119  |
| H | -3.086783 | -3.638297 | 3.464388  | H                      | -6.940485 | 1.967393  | -0.144607 |
| H | -1.344993 | -1.953337 | 4.078993  | H                      | -7.733650 | -0.291418 | 0.403991  |
| H | 0.596956  | -1.613069 | 2.641065  | C                      | -4.105994 | 2.123474  | 0.476860  |
| C | 1.177326  | -2.820890 | 0.381430  | C                      | -5.091939 | 0.967379  | 0.550096  |
| C | -1.085301 | -4.634926 | -0.489337 | C                      | -6.288981 | 1.135120  | -0.426355 |
| H | -1.969787 | -5.221233 | -0.720136 | C                      | -6.993643 | -0.235857 | -0.403802 |
| H | -0.238442 | -4.765303 | -1.146425 | C                      | -2.197052 | 3.466228  | -0.215242 |
| O | 1.872812  | -1.709306 | 0.532735  | C                      | -2.984124 | 2.307570  | -0.319771 |
| H | 1.362672  | -0.935071 | 0.887567  | C                      | -4.714122 | -0.478419 | 0.265853  |
| C | 1.932815  | -3.790581 | -0.445013 | C                      | -5.842291 | -1.184027 | -0.157114 |
| C | 2.643526  | -3.315405 | -1.550475 | H                      | -5.894850 | 1.332365  | -1.428537 |
| C | 2.051971  | -5.130209 | -0.062484 | O                      | -2.381079 | -0.392199 | 0.707784  |
| C | 3.447212  | -4.179269 | -2.285607 | H                      | -7.519180 | -0.457410 | -1.336723 |
| H | 2.548029  | -2.270897 | -1.826725 | C                      | -3.504332 | -1.143246 | 0.407870  |
| C | 2.858898  | -5.989435 | -0.797584 | C                      | -5.782748 | -2.561243 | -0.317200 |
| H | 1.511897  | -5.487384 | 0.809189  | O                      | -2.595789 | 1.280542  | -1.171144 |
| C | 3.553908  | -5.516581 | -1.910758 | C                      | -3.392565 | -2.531464 | 0.214002  |
| H | 3.994749  | -3.801103 | -3.142220 | H                      | -6.662052 | -3.124222 | -0.615771 |
| H | 2.955011  | -7.027347 | -0.496743 | C                      | -4.574617 | -3.217872 | -0.103626 |
| H | 4.184245  | -6.191227 | -2.481161 | H                      | -4.538578 | -4.296951 | -0.205058 |
| H | 3.716245  | 1.912824  | -1.629980 | C                      | -0.916387 | 3.603917  | -0.956413 |
| H | 3.567709  | 1.375182  | 2.623657  | C                      | -0.821828 | 3.324783  | -2.319785 |
| H | -2.951860 | 1.855893  | 2.041249  | C                      | 0.238695  | 3.959175  | -0.252832 |
| H | -3.905485 | 0.073273  | -1.755111 | C                      | 0.406737  | 3.384126  | -2.979125 |
| C | -4.920444 | -2.264928 | -0.752835 | C                      | 1.478341  | 4.016999  | -0.885354 |
|   |           |           |           | C                      | 1.545883  | 3.722825  | -2.248986 |

|   |           |           |           |
|---|-----------|-----------|-----------|
| H | 2.511320  | 3.746545  | -2.750957 |
| C | -2.091043 | -3.259709 | 0.272751  |
| C | -1.002925 | -2.827637 | 1.049572  |
| C | -1.931672 | -4.426698 | -0.483474 |
| C | 0.206984  | -3.520787 | 1.055762  |
| C | -0.753219 | -5.170499 | -0.446434 |
| C | 0.313950  | -4.700457 | 0.315887  |
| H | 1.254337  | -5.249674 | 0.321384  |
| N | 2.934281  | -1.049158 | -0.334145 |
| C | 1.781685  | -1.140467 | -1.007222 |
| N | 3.915391  | -1.584094 | 0.000002  |
| H | 1.087096  | -0.327541 | -0.910686 |
| C | 1.410055  | -2.318530 | -1.704696 |
| O | 0.282582  | -2.465789 | -2.211135 |
| O | 2.346101  | -3.266054 | -1.806929 |
| C | 2.001962  | -4.390672 | -2.614796 |
| H | 2.750969  | -5.151566 | -2.398696 |
| H | 1.001370  | -4.744233 | -2.369936 |
| H | 2.038083  | -4.114315 | -3.671795 |
| C | 2.906248  | 0.661005  | 1.701764  |
| C | 4.015281  | -0.091436 | 2.227572  |
| C | 3.901201  | -0.661929 | 3.536240  |
| C | 2.802616  | -0.429787 | 4.309387  |
| C | 1.707759  | 0.331231  | 3.802619  |
| C | 1.748854  | 0.837191  | 2.539385  |
| H | 4.729654  | -1.251473 | 3.910201  |
| H | 2.756575  | -0.829836 | 5.317070  |
| H | 0.829759  | 0.484651  | 4.421538  |
| H | 0.899626  | 1.359577  | 2.108083  |
| C | 2.798208  | 1.005819  | 0.357060  |
| C | 5.112764  | -0.458044 | 1.419579  |
| H | -1.713132 | 3.032718  | -2.868080 |
| H | 0.172797  | 4.131780  | 0.818969  |
| H | -1.085008 | -1.931862 | 1.652815  |
| H | -2.731586 | -4.757509 | -1.139424 |
| C | -0.647400 | -6.453709 | -1.233487 |
| C | 1.382005  | -3.001925 | 1.846826  |
| C | 0.490238  | 3.082414  | -4.454007 |
| C | 2.722763  | 4.366071  | -0.106229 |
| O | 5.871705  | -1.473923 | 1.883125  |
| H | 6.701228  | -1.500673 | 1.390278  |
| C | 5.804803  | 0.430503  | 0.442834  |
| C | 5.945927  | 1.795610  | 0.717474  |
| C | 6.422196  | -0.112395 | -0.688403 |
| C | 6.678719  | 2.606604  | -0.140441 |
| H | 5.466655  | 2.211674  | 1.598678  |
| C | 7.159599  | 0.702928  | -1.541961 |
| H | 6.281172  | -1.165418 | -0.917076 |
| C | 7.287270  | 2.062238  | -1.271076 |
| H | 6.781384  | 3.664635  | 0.077474  |
| H | 7.623615  | 0.277069  | -2.425320 |
| H | 7.858709  | 2.698047  | -1.939198 |
| H | 3.653961  | 1.163109  | -0.284786 |
| H | 1.848022  | 1.404695  | 0.009920  |
| H | 0.372570  | -6.846563 | -1.217344 |
| H | -0.940683 | -6.304016 | -2.277492 |
| H | -1.306280 | -7.222544 | -0.817859 |
| H | 2.325986  | -3.238729 | 1.345964  |

|   |           |           |           |
|---|-----------|-----------|-----------|
| H | 1.417304  | -3.444408 | 2.848493  |
| H | 1.324628  | -1.915355 | 1.964547  |
| H | 3.615717  | 3.948695  | -0.581299 |
| H | 2.669108  | 3.972586  | 0.913479  |
| H | 2.857318  | 5.451002  | -0.038469 |
| H | 0.062959  | 3.898462  | -5.045719 |
| H | -0.065358 | 2.173427  | -4.699362 |
| H | 1.526304  | 2.946000  | -4.772213 |

**TS-[4+2]-B4-R-3**

|   |           |           |           |
|---|-----------|-----------|-----------|
| H | 0.557567  | -0.486412 | -0.946087 |
| P | -1.081079 | 0.272880  | 0.334967  |
| O | -0.368106 | -0.693604 | -0.670760 |
| O | -0.271334 | 0.939363  | 1.376526  |
| H | -6.728316 | 1.784281  | 1.989955  |
| H | -7.058372 | 2.075817  | 0.283170  |
| H | -5.327641 | 4.276288  | 1.888383  |
| C | -6.308850 | 1.689516  | 0.984913  |
| C | -4.625052 | 3.670261  | 1.324391  |
| H | -6.738799 | -0.362032 | 0.257362  |
| C | -5.910802 | 0.242928  | 0.637647  |
| C | -4.998980 | 2.427392  | 0.831414  |
| H | -5.508718 | -0.250741 | 1.528373  |
| C | -3.331224 | 4.130668  | 1.093753  |
| H | -3.030130 | 5.108982  | 1.455510  |
| H | -6.229428 | 1.246649  | -1.823827 |
| H | -6.669861 | -1.165168 | -1.992875 |
| C | -4.091313 | 1.650491  | 0.107145  |
| C | -4.764080 | 0.389971  | -0.404089 |
| C | -5.359488 | 0.583773  | -1.827343 |
| C | -5.671265 | -0.844218 | -2.313860 |
| C | -2.384414 | 3.360118  | 0.407415  |
| C | -2.794717 | 2.107648  | -0.066997 |
| C | -4.016540 | -0.917472 | -0.595471 |
| C | -4.598932 | -1.660049 | -1.628327 |
| H | -4.591522 | 1.031367  | -2.466742 |
| O | -2.235992 | -0.635886 | 0.987815  |
| H | -5.636964 | -0.938753 | -3.402453 |
| C | -2.938413 | -1.450115 | 0.092277  |
| C | -4.148568 | -2.940542 | -1.919203 |
| O | -1.870967 | 1.254535  | -0.673681 |
| C | -2.476003 | -2.750733 | -0.155183 |
| H | -4.597205 | -3.515502 | -2.723755 |
| C | -3.109242 | -3.483015 | -1.164719 |
| H | -2.760108 | -4.492402 | -1.361986 |
| C | -1.005439 | 3.869761  | 0.197085  |
| C | -0.398742 | 3.792728  | -1.057076 |
| C | -0.319848 | 4.486156  | 1.249630  |
| C | 0.865093  | 4.342682  | -1.277900 |
| C | 0.941871  | 5.040744  | 1.055238  |
| C | 1.511624  | 4.977376  | -0.219180 |
| H | 2.490466  | 5.425660  | -0.384647 |
| C | -1.362246 | -3.344884 | 0.628530  |
| C | -1.397232 | -3.307205 | 2.022205  |
| C | -0.299796 | -3.994845 | -0.012885 |
| C | -0.409872 | -3.938744 | 2.781590  |
| C | 0.709470  | -4.612615 | 0.721670  |
| C | 0.629086  | -4.587143 | 2.118038  |

|   |           |           |           |
|---|-----------|-----------|-----------|
| H | 1.407750  | -5.077985 | 2.700086  |
| N | 2.951314  | -1.366142 | -1.435693 |
| C | 2.987069  | -2.562049 | -1.994337 |
| N | 2.318110  | -0.415588 | -1.206857 |
| H | 3.885485  | -3.149989 | -1.942980 |
| C | 1.801879  | -3.047098 | -2.682275 |
| O | 1.699480  | -4.147924 | -3.186910 |
| O | 0.807239  | -2.131450 | -2.684803 |
| C | -0.399996 | -2.495090 | -3.346326 |
| H | -1.180020 | -1.871707 | -2.908202 |
| H | -0.306260 | -2.304542 | -4.418835 |
| H | -0.622197 | -3.553198 | -3.195887 |
| C | 3.200220  | 0.026073  | 1.588356  |
| C | 4.288696  | 0.235811  | 2.445964  |
| C | 4.431868  | -0.525608 | 3.597882  |
| C | 3.490227  | -1.506563 | 3.900109  |
| C | 2.409668  | -1.719306 | 3.049704  |
| C | 2.255551  | -0.956293 | 1.894658  |
| H | 5.275786  | -0.353047 | 4.257620  |
| H | 3.598386  | -2.106219 | 4.798279  |
| H | 1.678507  | -2.486155 | 3.273723  |
| H | 1.418316  | -1.147152 | 1.229925  |
| C | 3.084266  | 0.949112  | 0.424832  |
| C | 5.096768  | -1.091594 | -0.490680 |
| H | 5.813056  | -1.764668 | -0.953136 |
| O | 2.060544  | 1.785425  | 0.408190  |
| H | 1.312929  | 1.518293  | 0.997724  |
| C | 4.158532  | 1.231694  | -0.446285 |
| C | 4.171774  | 2.517961  | -1.083260 |
| C | 5.154264  | 0.248417  | -0.824016 |
| C | 5.138505  | 2.859816  | -1.975407 |
| H | 3.402780  | 3.224983  | -0.792606 |
| C | 6.142957  | 0.668654  | -1.792391 |
| C | 6.147543  | 1.912004  | -2.334926 |
| H | 5.152883  | 3.853943  | -2.410570 |
| H | 6.898124  | -0.057659 | -2.078231 |
| H | 6.914872  | 2.190466  | -3.050188 |
| H | -0.924512 | 3.311291  | -1.876964 |
| H | -0.776339 | 4.515697  | 2.235775  |
| H | -2.215517 | -2.795373 | 2.521965  |
| H | -0.254064 | -4.013623 | -1.098416 |
| C | 1.876248  | -5.285278 | 0.044658  |
| C | -0.473614 | -3.901729 | 4.288190  |
| C | 1.518945  | 4.217379  | -2.629663 |
| C | 1.698232  | 5.668230  | 2.197930  |
| H | 4.549381  | -1.482730 | 0.353709  |
| H | 5.019828  | 0.997830  | 2.194911  |
| H | 1.902687  | 3.201318  | -2.773511 |
| H | 0.809335  | 4.423068  | -3.435488 |
| H | 2.360984  | 4.907682  | -2.729729 |
| H | 2.456556  | 4.978144  | 2.582102  |
| H | 2.213467  | 6.578436  | 1.879576  |
| H | 1.031148  | 5.922844  | 3.024451  |
| H | 2.805755  | -4.754257 | 0.276806  |
| H | 1.761029  | -5.296648 | -1.041197 |
| H | 1.990259  | -6.314950 | 0.396964  |
| H | 0.363204  | -4.445637 | 4.733427  |
| H | -0.444259 | -2.870844 | 4.655879  |

|                        |           |           |           |
|------------------------|-----------|-----------|-----------|
| H                      | -1.401116 | -4.351477 | 4.654434  |
| <b>TS-[4+2]-B4-S-2</b> |           |           |           |
| P                      | 1.572191  | -0.136896 | -0.414328 |
| O                      | 0.435623  | -0.912222 | 0.120669  |
| O                      | 2.124577  | 0.831474  | 0.770312  |
| O                      | 2.876931  | -1.019613 | -0.797084 |
| C                      | 3.145932  | 1.718633  | 0.469292  |
| C                      | 4.455976  | 1.268169  | 0.563823  |
| C                      | 3.341001  | -1.858286 | 0.209603  |
| C                      | 4.277539  | -1.355054 | 1.102474  |
| C                      | 5.504809  | 2.099132  | 0.161916  |
| C                      | 5.252979  | 3.407944  | -0.221090 |
| C                      | 4.687858  | -2.136834 | 2.186545  |
| C                      | 4.231971  | -3.438722 | 2.328848  |
| C                      | 3.939399  | 3.862714  | -0.242829 |
| H                      | 3.743869  | 4.895141  | -0.510632 |
| C                      | 2.849995  | 3.029101  | 0.053108  |
| C                      | 3.327586  | -3.940298 | 1.399431  |
| H                      | 2.975764  | -4.962520 | 1.492702  |
| C                      | 2.831625  | -3.161148 | 0.344835  |
| O                      | 1.437214  | 0.698842  | -1.705921 |
| H                      | 0.591863  | 1.271687  | -1.973897 |
| C                      | 1.463413  | 3.549869  | -0.114793 |
| C                      | 0.380212  | 3.112180  | 0.664785  |
| C                      | 1.227658  | 4.545020  | -1.069240 |
| C                      | -0.893132 | 3.653765  | 0.497652  |
| C                      | -0.026824 | 5.133225  | -1.223251 |
| C                      | -1.081147 | 4.673183  | -0.439239 |
| H                      | -2.074543 | 5.099813  | -0.570729 |
| C                      | 1.779831  | -3.721985 | -0.544129 |
| C                      | 0.810709  | -4.569256 | 0.001158  |
| C                      | 1.751338  | -3.469383 | -1.920418 |
| C                      | -0.155769 | -5.181131 | -0.797622 |
| C                      | 0.777059  | -4.042656 | -2.735214 |
| C                      | -0.163782 | -4.903215 | -2.163833 |
| H                      | -0.910625 | -5.373918 | -2.801031 |
| N                      | -3.105719 | 0.595505  | -0.602410 |
| C                      | -1.869383 | 0.826189  | -1.061527 |
| N                      | -4.234596 | 0.885358  | -0.659799 |
| H                      | -1.084913 | 0.167628  | -0.736319 |
| C                      | -1.606730 | 1.854484  | -2.001910 |
| O                      | -0.475506 | 2.062273  | -2.477749 |
| O                      | -2.656171 | 2.594379  | -2.371490 |
| C                      | -2.405467 | 3.538249  | -3.411134 |
| H                      | -2.187071 | 3.018382  | -4.346924 |
| H                      | -3.320500 | 4.121123  | -3.505929 |
| H                      | -1.560158 | 4.175131  | -3.150709 |
| C                      | -3.539752 | -1.822713 | 0.364414  |
| C                      | -4.942407 | -1.565928 | 0.167722  |
| C                      | -5.697136 | -2.462633 | -0.655967 |
| C                      | -5.118972 | -3.567476 | -1.205365 |
| C                      | -3.726450 | -3.819865 | -1.026163 |
| C                      | -2.965812 | -2.972761 | -0.281128 |
| H                      | -6.749016 | -2.252610 | -0.808224 |
| H                      | -5.717904 | -4.256804 | -1.791450 |
| H                      | -3.266186 | -4.679919 | -1.503348 |
| H                      | -1.893685 | -3.127690 | -0.176836 |

|                        |           |           |           |   |           |           |           |
|------------------------|-----------|-----------|-----------|---|-----------|-----------|-----------|
| C                      | -2.674040 | -0.881477 | 0.912712  | H | -6.452586 | 2.076716  | 2.450485  |
| C                      | -5.536599 | -0.347965 | 0.565365  | H | -6.927961 | 2.414637  | 0.787022  |
| H                      | 6.064831  | 4.070455  | -0.505889 | H | -4.923951 | 4.480961  | 2.260813  |
| H                      | 4.562975  | -4.055591 | 3.158987  | C | -6.137064 | 1.976887  | 1.408580  |
| C                      | 5.021000  | -0.030187 | 1.115208  | C | -4.315655 | 3.852306  | 1.617481  |
| C                      | 6.818091  | 1.353183  | 0.205234  | H | -6.748112 | -0.036853 | 0.704610  |
| C                      | 6.355617  | -0.110785 | 0.321916  | C | -5.854677 | 0.516681  | 1.007193  |
| C                      | 5.328454  | 0.099486  | 2.635202  | C | -4.808978 | 2.645737  | 1.137803  |
| C                      | 5.594821  | -1.343452 | 3.097244  | H | -5.394438 | -0.012046 | 1.848259  |
| H                      | 7.085977  | -0.765745 | 0.805351  | C | -3.022775 | 4.244121  | 1.276047  |
| H                      | 6.142454  | -0.512385 | -0.674059 | H | -2.626404 | 5.189074  | 1.635242  |
| H                      | 7.415568  | 1.654373  | 1.074495  | H | -6.363806 | 1.565121  | -1.401836 |
| H                      | 7.428066  | 1.536785  | -0.683488 | H | -6.936460 | -0.820548 | -1.548722 |
| H                      | 6.156262  | 0.786184  | 2.833063  | C | -4.023565 | 1.835065  | 0.314141  |
| H                      | 4.435427  | 0.488011  | 3.135604  | C | -4.809950 | 0.618568  | -0.141997 |
| H                      | 6.645366  | -1.622595 | 2.948870  | C | -5.532108 | 0.861267  | -1.497713 |
| H                      | 5.365078  | -1.502067 | 4.154400  | C | -5.960513 | -0.543136 | -1.965731 |
| H                      | 2.032830  | 4.860119  | -1.726499 | C | -2.196684 | 3.438523  | 0.484034  |
| H                      | 0.528422  | 2.339012  | 1.409943  | C | -2.725946 | 2.225702  | 0.025216  |
| H                      | 2.500694  | -2.820464 | -2.362011 | C | -4.152179 | -0.722253 | -0.420329 |
| H                      | 0.802592  | -4.751063 | 1.072773  | C | -4.865189 | -1.419111 | -1.401059 |
| C                      | -0.221479 | 6.242856  | -2.226928 | H | -4.809671 | 1.280530  | -2.205695 |
| C                      | -2.064287 | 3.154111  | 1.306324  | O | -2.218724 | -0.542417 | 0.980233  |
| C                      | 0.732843  | -3.725632 | -4.208356 | H | -6.040621 | -0.621505 | -3.053188 |
| C                      | -1.165596 | -6.117108 | -0.180215 | C | -3.036622 | -1.313988 | 0.147361  |
| H                      | -1.603557 | -1.069370 | 0.872835  | C | -4.497363 | -2.709884 | -1.756012 |
| H                      | -3.000063 | -0.122347 | 1.610173  | O | -1.908788 | 1.344310  | -0.682120 |
| C                      | -5.304293 | 0.357252  | 1.858555  | C | -2.648157 | -2.625193 | -0.167163 |
| C                      | -5.378069 | 1.752428  | 1.924099  | H | -5.046565 | -3.250391 | -2.521156 |
| C                      | -5.131692 | -0.380587 | 3.034623  | C | -3.409696 | -3.309149 | -1.121008 |
| C                      | -5.254094 | 2.402557  | 3.148490  | H | -3.126275 | -4.327253 | -1.371119 |
| H                      | -5.487280 | 2.323000  | 1.005650  | C | -0.802241 | 3.841067  | 0.164104  |
| C                      | -5.007987 | 0.272921  | 4.254722  | C | -0.333871 | 3.807464  | -1.149387 |
| H                      | -5.081656 | -1.463747 | 2.977903  | C | 0.056898  | 4.263233  | 1.184746  |
| C                      | -5.065859 | 1.664657  | 4.313894  | C | 0.970208  | 4.204048  | -1.455557 |
| H                      | -5.293064 | 3.486192  | 3.188351  | C | 1.366291  | 4.642068  | 0.905904  |
| H                      | -4.869194 | -0.304951 | 5.162324  | C | 1.803500  | 4.619530  | -0.421024 |
| H                      | -4.963839 | 2.172037  | 5.267470  | H | 2.830652  | 4.901980  | -0.645639 |
| O                      | -6.714341 | -0.050239 | -0.023561 | C | -1.477966 | -3.262801 | 0.491196  |
| H                      | -7.136332 | 0.671156  | 0.459441  | C | -1.322792 | -3.155454 | 1.874664  |
| H                      | 0.309012  | 7.148413  | -1.916143 | C | -0.544750 | -4.005145 | -0.244550 |
| H                      | -1.278562 | 6.498383  | -2.337268 | C | -0.262311 | -3.778249 | 2.532000  |
| H                      | 0.167337  | 5.959495  | -3.210052 | C | 0.523198  | -4.638529 | 0.391901  |
| H                      | -2.346106 | 3.869351  | 2.087065  | C | 0.652076  | -4.508252 | 1.777421  |
| H                      | -2.938045 | 3.004420  | 0.662382  | H | 1.489022  | -4.992682 | 2.277460  |
| H                      | -1.833654 | 2.200479  | 1.788802  | N | 2.708512  | -1.590871 | -1.263601 |
| H                      | -1.892656 | -5.570785 | 0.430244  | C | 2.643951  | -2.712189 | -1.963505 |
| H                      | -1.718344 | -6.664514 | -0.948360 | N | 2.216248  | -0.557796 | -1.032638 |
| H                      | -0.676086 | -6.849093 | 0.468281  | H | 3.341974  | -3.502764 | -1.759616 |
| H                      | 0.143990  | -2.820678 | -4.389527 | C | 1.511089  | -2.923601 | -2.846648 |
| H                      | 0.276181  | -4.539439 | -4.777033 | O | 1.243657  | -3.984009 | -3.379610 |
| H                      | 1.735449  | -3.548827 | -4.604841 | O | 0.754122  | -1.814974 | -2.986797 |
|                        |           |           |           | C | -0.485055 | -1.994432 | -3.666328 |
|                        |           |           |           | H | -0.894782 | -0.994700 | -3.799232 |
|                        |           |           |           | H | -0.326679 | -2.489934 | -4.625394 |
|                        |           |           |           | H | -1.170051 | -2.588565 | -3.054243 |
|                        |           |           |           | C | 3.246069  | -0.337513 | 1.438690  |
|                        |           |           |           | C | 4.009070  | -1.527536 | 1.126285  |
| <b>TS-[4+2]-B4-S-3</b> |           |           |           |   |           |           |           |
| H                      | 0.483931  | -0.629451 | -0.980342 |   |           |           |           |
| P                      | -1.080623 | 0.296649  | 0.219325  |   |           |           |           |
| O                      | -0.505137 | -0.633029 | -0.893369 |   |           |           |           |
| O                      | -0.144253 | 0.882729  | 1.208013  |   |           |           |           |



|   |           |           |           |
|---|-----------|-----------|-----------|
| C | 3.940365  | -2.615021 | 2.069353  |
| C | 3.183410  | -2.549976 | 3.195995  |
| C | 2.394415  | -1.393938 | 3.468414  |
| C | 2.409058  | -0.342279 | 2.603955  |
| H | 4.523811  | -3.504632 | 1.849404  |
| H | 3.176526  | -3.382801 | 3.893114  |
| H | 1.799494  | -1.346417 | 4.373903  |
| H | 1.820955  | 0.541555  | 2.823830  |
| C | 3.208217  | 0.813734  | 0.610672  |
| C | 4.614543  | -1.760869 | -0.101227 |
| H | 5.070625  | -2.732163 | -0.269513 |
| H | 4.916171  | -0.972746 | -0.775067 |
| O | 2.233403  | 1.691191  | 0.675468  |
| H | 1.340510  | 1.326523  | 0.959799  |
| C | 4.350269  | 1.353482  | -0.168483 |
| C | 4.084735  | 2.066372  | -1.340782 |
| C | 5.660156  | 1.260990  | 0.309860  |
| C | 5.127962  | 2.654235  | -2.047000 |
| H | 3.056982  | 2.141042  | -1.682162 |
| C | 6.698676  | 1.859537  | -0.393366 |
| H | 5.855347  | 0.717466  | 1.229511  |
| C | 6.434905  | 2.551825  | -1.574429 |
| H | 4.922268  | 3.191211  | -2.967648 |
| H | 7.714184  | 1.791233  | -0.017685 |
| H | 7.248470  | 3.014367  | -2.123989 |
| H | -0.996013 | 3.473226  | -1.943956 |
| H | -0.296259 | 4.251780  | 2.213022  |
| H | -2.045586 | -2.583362 | 2.449443  |
| H | -0.640632 | -4.087652 | -1.325737 |
| C | 1.509764  | -5.481920 | -0.375393 |
| C | -0.148921 | -3.693042 | 4.032569  |
| C | 1.457214  | 4.176970  | -2.882869 |
| C | 2.328062  | 4.990340  | 2.010753  |
| H | 1.436013  | -5.313195 | -1.451878 |
| H | 2.533264  | -5.259665 | -0.055943 |
| H | 1.333360  | -6.545408 | -0.181303 |
| H | -0.840959 | -4.391086 | 4.515367  |
| H | 0.860449  | -3.942709 | 4.369263  |
| H | -0.393059 | -2.688665 | 4.388814  |
| H | 2.996021  | 4.142597  | 2.197889  |
| H | 2.949988  | 5.848963  | 1.743875  |
| H | 1.804049  | 5.220152  | 2.941247  |
| H | 1.321876  | 3.185727  | -3.327303 |
| H | 0.904440  | 4.889374  | -3.503073 |
| H | 2.517833  | 4.435718  | -2.940357 |

#### <sup>1</sup>INT0

|   |           |           |           |
|---|-----------|-----------|-----------|
| C | -3.447441 | -1.468426 | 0.146863  |
| C | -2.280260 | -1.999788 | 0.684687  |
| C | -1.126307 | -1.225409 | 0.699583  |
| C | -1.131107 | 0.082334  | 0.202340  |
| C | -2.315586 | 0.636233  | -0.321861 |
| C | -3.455330 | -0.169276 | -0.352287 |
| H | -4.354712 | -2.063506 | 0.115597  |
| H | -2.265762 | -3.007582 | 1.085659  |
| H | -0.209252 | -1.629242 | 1.117735  |
| H | -4.370937 | 0.238034  | -0.771953 |
| C | 0.111637  | 0.914631  | 0.310960  |

|   |           |           |           |
|---|-----------|-----------|-----------|
| C | 1.452056  | 0.277152  | 0.081907  |
| C | 2.570742  | 0.903680  | 0.639703  |
| C | 1.622614  | -0.857053 | -0.716958 |
| C | 3.841485  | 0.386697  | 0.425806  |
| H | 2.416768  | 1.797387  | 1.235275  |
| C | 2.898987  | -1.364322 | -0.943798 |
| H | 0.759920  | -1.331093 | -1.174123 |
| C | 4.006404  | -0.748974 | -0.366708 |
| H | 4.705705  | 0.869001  | 0.870727  |
| H | 3.028410  | -2.238869 | -1.572842 |
| H | 5.000048  | -1.150587 | -0.538609 |
| O | 0.047108  | 2.098314  | 0.588156  |
| C | -2.391631 | 2.047384  | -0.847265 |
| H | -2.385491 | 2.765266  | -0.024363 |
| H | -1.533453 | 2.293260  | -1.476644 |
| H | -3.305683 | 2.182233  | -1.429538 |

#### <sup>3</sup>INT0

|   |           |           |           |
|---|-----------|-----------|-----------|
| C | 3.514577  | -1.446961 | -0.137165 |
| C | 2.323222  | -2.039138 | -0.550482 |
| C | 1.154884  | -1.295715 | -0.573192 |
| C | 1.141103  | 0.053399  | -0.160217 |
| C | 2.356744  | 0.665148  | 0.242873  |
| C | 3.514918  | -0.108699 | 0.247152  |
| H | 4.436586  | -2.018136 | -0.118890 |
| H | 2.306502  | -3.075022 | -0.872964 |
| H | 0.236132  | -1.743444 | -0.936256 |
| H | 4.443353  | 0.354200  | 0.570214  |
| C | -0.116021 | 0.781916  | -0.198721 |
| C | -1.455538 | 0.250715  | -0.057895 |
| C | -2.553723 | 0.972111  | -0.574888 |
| C | -1.707471 | -0.943874 | 0.650234  |
| C | -3.846448 | 0.497276  | -0.411643 |
| H | -2.375044 | 1.891809  | -1.122173 |
| C | -3.004011 | -1.411312 | 0.793091  |
| H | -0.881424 | -1.482977 | 1.101098  |
| C | -4.082142 | -0.698682 | 0.264569  |
| H | -4.677434 | 1.060965  | -0.823661 |
| H | -3.178897 | -2.333868 | 1.337542  |
| H | -5.094221 | -1.069597 | 0.384917  |
| O | -0.065275 | 2.091712  | -0.421953 |
| C | 2.423477  | 2.100186  | 0.699479  |
| H | 2.270135  | 2.798032  | -0.129425 |
| H | 1.654506  | 2.315457  | 1.446882  |
| H | 3.400582  | 2.310656  | 1.139182  |

#### <sup>3</sup>TS1

|   |           |           |           |
|---|-----------|-----------|-----------|
| C | 3.575366  | -1.411211 | -0.207697 |
| C | 2.362478  | -2.075216 | -0.399557 |
| C | 1.160839  | -1.391873 | -0.323449 |
| C | 1.132171  | -0.009339 | -0.028859 |
| C | 2.372462  | 0.662457  | 0.146250  |
| C | 3.567528  | -0.041657 | 0.046521  |
| H | 4.514997  | -1.948197 | -0.275043 |
| H | 2.356118  | -3.134080 | -0.637721 |
| H | 0.236123  | -1.912220 | -0.541468 |
| H | 4.504547  | 0.492590  | 0.178179  |
| C | -0.084397 | 0.758926  | 0.005336  |

|                         |           |           |           |                         |           |           |           |
|-------------------------|-----------|-----------|-----------|-------------------------|-----------|-----------|-----------|
| C                       | -1.448559 | 0.238774  | 0.013099  | H                       | -4.734124 | 0.975649  | -0.524629 |
| C                       | -2.479037 | 0.994812  | -0.577467 | H                       | -2.961414 | -2.484676 | 1.299600  |
| C                       | -1.786862 | -0.966833 | 0.655460  | H                       | -4.988897 | -1.224027 | 0.604687  |
| C                       | -3.789084 | 0.538312  | -0.560782 | O                       | -0.118591 | 2.053038  | -0.832557 |
| H                       | -2.231062 | 1.934809  | -1.058260 | C                       | 2.103289  | 1.952929  | 1.114898  |
| C                       | -3.100118 | -1.417405 | 0.661906  | H                       | 2.958444  | 2.391584  | 1.613836  |
| H                       | -1.022051 | -1.528310 | 1.180778  | H                       | 0.784517  | 2.272712  | -1.092932 |
| C                       | -4.107526 | -0.673714 | 0.049883  | H                       | 1.151469  | 2.460121  | 1.192218  |
| H                       | -4.567702 | 1.130190  | -1.031489 |                         |           |           |           |
| H                       | -3.341472 | -2.348506 | 1.164915  | <b><sup>3</sup>INT2</b> |           |           |           |
| H                       | -5.132197 | -1.029905 | 0.058841  | C                       | 3.829432  | -0.551807 | -0.429091 |
| O                       | -0.040530 | 2.100550  | 0.008572  | C                       | 3.432388  | 0.677302  | -0.951625 |
| C                       | 2.354906  | 2.123951  | 0.430040  | C                       | 2.136545  | 1.138364  | -0.714802 |
| H                       | 3.040892  | 2.729540  | -0.164451 | C                       | 1.222919  | 0.401866  | 0.040476  |
| H                       | 1.209616  | 2.432157  | 0.104697  | C                       | 1.633209  | -0.845605 | 0.612223  |
| H                       | 2.375433  | 2.397628  | 1.488352  | C                       | 2.944434  | -1.295918 | 0.335903  |
|                         |           |           |           | H                       | 4.831714  | -0.925266 | -0.611735 |
| <b><sup>3</sup>INT1</b> |           |           |           | H                       | 4.117766  | 1.269907  | -1.547941 |
| C                       | 3.629224  | -1.238576 | -0.068945 | H                       | 1.812703  | 2.081345  | -1.147691 |
| C                       | 2.551294  | -1.850841 | -0.706035 | H                       | 3.263014  | -2.241830 | 0.764869  |
| C                       | 1.325780  | -1.186531 | -0.785639 | C                       | -0.110054 | 0.978929  | 0.276804  |
| C                       | 1.143634  | 0.072928  | -0.219376 | C                       | -1.365959 | 0.362222  | 0.010767  |
| C                       | 2.238503  | 0.702163  | 0.458788  | C                       | -2.572501 | 1.013485  | 0.367653  |
| C                       | 3.474214  | 0.016407  | 0.498762  | C                       | -1.453592 | -0.897645 | -0.631315 |
| H                       | 4.587979  | -1.743254 | -0.010839 | C                       | -3.795874 | 0.418772  | 0.111684  |
| H                       | 2.663205  | -2.832756 | -1.153043 | H                       | -2.520560 | 1.982660  | 0.849892  |
| H                       | 0.491403  | -1.646109 | -1.307045 | C                       | -2.686611 | -1.479017 | -0.876737 |
| H                       | 4.307159  | 0.485881  | 1.014564  | H                       | -0.545166 | -1.399953 | -0.946867 |
| C                       | -0.143141 | 0.770161  | -0.368765 | C                       | -3.866907 | -0.831851 | -0.506847 |
| C                       | -1.430814 | 0.221562  | -0.109232 | H                       | -4.708458 | 0.932734  | 0.397783  |
| C                       | -2.597405 | 0.934926  | -0.481542 | H                       | -2.730393 | -2.443703 | -1.372713 |
| C                       | -1.595689 | -1.024221 | 0.545637  | H                       | -4.829131 | -1.292199 | -0.703742 |
| C                       | -3.854318 | 0.414215  | -0.225225 | O                       | -0.153430 | 2.294984  | 0.631453  |
| H                       | -2.489023 | 1.892372  | -0.977363 | C                       | 0.794838  | -1.602218 | 1.468465  |
| C                       | -2.860479 | -1.529822 | 0.792905  | H                       | 1.152665  | -2.538064 | 1.879499  |
| H                       | -0.720299 | -1.575446 | 0.872423  | H                       | 0.719278  | 2.553301  | 0.953020  |
| C                       | -4.001041 | -0.821359 | 0.408599  | H                       | -0.189600 | -1.260077 | 1.752642  |

## 16. References

1. Frisch, M. J. *et al.* Gaussian 16 Rev. C.01. (2016).
2. Lu, T. & Chen, F. Multiwfn: A multifunctional wavefunction analyzer. *J. Comput. Chem.* **33**, 580–592 (2012).
3. Lu, T. & Chen, F. Atomic dipole moment corrected Hirshfeld population method. *J. Theor. Comput. Chem.* **11**, 163–183 (2012).
4. Breneman, C. M. & Wiberg, K. B. Determining atom-centered monopoles from molecular electrostatic potentials. The need for high sampling density in formamide conformational analysis. *J. Comput. Chem.* **11**, 361–373 (1990).
5. Reed, A. E., Weinstock, R. B. & Weinhold, F. Natural population analysis. *J. Chem. Phys.* **83**, 735–746 (1985).
6. Fonseca Guerra, C., Handgraaf, J.-W., Baerends, E. J. & Bickelhaupt, F. M. Voronoi deformation density (VDD) charges: Assessment of the Mulliken, Bader, Hirshfeld, Weinhold, and VDD methods for charge analysis. *J. Comput. Chem.* **25**, 189–210 (2004).
7. Falivene, L. *et al.* Towards the online computer-aided design of catalytic pockets. *Nat. Chem.* **11**, 872–879 (2019).
8. Lin, Y.-S., Li, G.-D., Mao, S.-P. & Chai, J.-D. Long-Range Corrected Hybrid Density Functionals with Improved Dispersion Corrections. *J. Chem. Theory Comput.* **9**, 263–272 (2013).
9. Mardirossian, N. & Head-Gordon, M.  $\omega$ B97M-V: A combinatorially optimized, range-separated hybrid, meta-GGA density functional with VV10 nonlocal correlation. *J. Chem. Phys.* **144**, 214110 (2016).
10. Najibi, A. & Goerigk, L. The Nonlocal Kernel in van der Waals Density Functionals as an Additive Correction: An Extensive Analysis with Special Emphasis on the B97M-V and  $\omega$ B97M-V Approaches. *J. Chem. Theory Comput.* **14**, 5725–5738 (2018).
11. Najibi, A. & Goerigk, L. DFT-D4 counterparts of leading meta-generalized-gradient approximation and hybrid density functionals for energetics and geometries. *J. Comput. Chem.* **41**, 2562–2572 (2020).
12. Goerigk, L. & Grimme, S. Efficient and Accurate Double-Hybrid-Meta-GGA Density Functionals—Evaluation with the Extended GMTKN30 Database for General Main Group Thermochemistry, Kinetics, and Noncovalent Interactions. *J. Chem. Theory Comput.* **7**, 291–309 (2011).
13. Neese, F. Software update: The ORCA program system—Version 5.0. *WIREs Comput. Mol. Sci.* **12**, e1606 (2022).
